# Supplementary material for: Chilling stress response in tobacco seedlings: insights from transcriptome, proteome, and phosphoproteome analyses
Source: Frontiers journal article supplement (doi:10.3389/fpls.2024.1390993), 2024-05-28
Supplement: Data_Sheet_2.zip [file Data_Sheet_2.zip]

## Sheet: S_prot
Supplementary Table S2 Statistically quantified proteins of the global proteome samples under chilling treatment
Protein	Description	Gene	S_0h_1	S_0h_2	S_0h_3	S_24h_1	S_24h_2	S_24h_3
A0A024AXE8	Dihydroflavonol reductase	LOC107770552	34316	15636.1	0	23890.1	7544	37690.2
A0A059TCI1	Cysteine proteinase inhibitor	LOC107761445	332600	489223	483179	251822	221118	184121
A0A059TCN3	Cystein protease inhibitor 3		10262	20457.1	18089.9	20739.9	18716.2	23575.8
A0A1S4BM24	omega-6 fatty acid desaturase, chloroplastic-like isoform X2	LOC107809769	2412000	1.37288e+06	764333	472838	2.05533e+06	402903
A0A067YEE1	Lycopene epsilon-cyclase	LcyE	180740	200151	190926	232206	211313	0
F6N7C2	Zeta-carotene desaturase		1189000	973231	1.77371e+06	1.83054e+06	1.85488e+06	1.51583e+06
A0A068BIS3	Tocopherol cyclase	TC	95496	140095	61327.4	62137.9	93202.6	79075.4
A0A1S3ZAM9	Fructose-bisphosphatase	LOC107784747	22237000	2.6537e+07	2.30157e+07	2.65172e+07	1.96726e+07	2.82596e+07
A0A068JCD7	Fructokinase	FRK2	95194	94469	111576	117122	100316	121822
A0A1S4BVA9	ATP-dependent 6-phosphofructokinase	LOC107812275	906370	211902	385300	141662	47439	238103
A0A068JDA3	Endoglucanase	Cel3	105330	0	74052.8	276065	395275	92036.1
A0A068JFR6	Triosephosphate isomerase	LOC107804179	22470000	1.92715e+07	1.37282e+07	18552105	1.75694e+07	1.59768e+07
A0A1S4D0G2	Fructose-bisphosphate aldolase	LOC107824494	1888200	1.99942e+06	1.6423e+06	1.21299e+06	1.46716e+06	1.14102e+06
A0A075EYQ1	Malate dehydrogenase [NADP], chloroplastic	chMDH	184580	55585.7	153010	92119.6	65233.2	208762
A0A075EYQ4	Ubiquitin-conjugating enzyme E2 35-like protein	Fni3	757820	597008	853003	869884	588802	608944
A0A075EYQ6	Eukaryotic translation initiation factor 5A	eIF-5A3	5689100	3.71594e+06	3.71684e+06	2.51771e+06	4.22098e+06	5.36083e+06
A0A075EZT4	Acyl-coenzyme A oxidase	Acx1B	41343	42105	38816.1	36858.5	29382.2	42775.4
A0A1S4B5M6	Malate dehydrogenase	LOC107804686	441950	578647	708565	132089	485170	567194
A0A1S4B7R8	osmotin-like protein	LOC107805329	64040	0	7479.2	0	89187.8	26277.7
Q40561	Proteinase inhibitor type-2		150850	293576	195334	129591	88617.9	65879
A0A1S4D4Z4	BRASSINOSTEROID INSENSITIVE 1-associated receptor kinase 1-like	LOC107825933	0	0	112546	0	111137	0
A0A075F1U0	Constitutive plastid-lipid associated protein	CHRD	439550	447130	385350	408021	353510	285029
A0A075F1U5	Protein tyrosine phosphatase	ptpkis1	125760	368766	396247	447314	575293	854767
A0A075F2H4	Ubiquitin-conjugating enzyme E2 36-like protein	Ubc13-2	49379	0	184841	45326.3	53126.9	208928
A0A075F933	Cysteine proteinase inhibitor	CYS3	529710	574437	536046	509551	543218	412569
A0A075F9G5	Cysteine protease inhibitor	CYS2	282840	2009052	527342	2.40693e+06	3.06952e+06	2.30472e+06
A0A1S3Y855	mRNA cap-binding protein	LOC107773302	101470	107753	88398.5	94655.6	0	83712.7
A0A1S4BT88	Glucose-6-phosphate isomerase	LOC107811651	966820	1.10717e+06	996400	1.02574e+06	873335	1.02771e+06
A0A076FNH2	Solanesyl diphosphate synthase 1-like protein	LOC107832641	183210	999069	755407	541728	661346	969765
A0A076FNJ9	Delta-aminolevulinic acid dehydratase		7275600	4.1176e+06	6.68041e+06	1.12197e+07	7.98601e+06	9.07433e+06
A0A076FU21	Temperature-induced lipocalin	TIL	76706	39882.5	84375.4	70674.3	52842.5	80770.8
A0A1S3XT26	Alkaline/neutral invertase	LOC107768486	0	61141.9	0	66759.3	79862.4	52269
A0A076KWF9	Gluaredoxin	LOC107801695	1881000	1.90002e+06	1.51575e+06	1.76235e+06	911120	1.69766e+06
A0A076KWG3	Transaldolase	LOC107792012	0	141719	217552	0	154296	145147
A0A076KWG4	CLB1	LOC107779296	526540	603072	370228	432828	582070	464981
A0A1S4D239	GDP-L-galactose phosphorylase 1-like	LOC107825126	0	2091.1	3752.5	34307.2	32952	32747.6
A0A1S3ZMX9	Biotin carboxyl carrier protein of acetyl-CoA carboxylase	LOC107788710	943870	1.02853e+06	814490	799478	1.06973e+06	99652.9
A0A1S4BT56	PHD finger protein Alfin1-like	LOC107811534	22575	3028.3	16120.8	13957.3	15342.4	13405.4
A0A076L1Y1	Chlorophyll a-b binding protein, chloroplastic	LOC107793205	15532000	1.27286e+07	2.01318e+07	18864361	2.38147e+07	2.30549e+07
A0A076L1Z5	Remorin 2	LOC107810092	28007	42598.4	26963	0	0	30784.5
A0A1S4B8P1	Peptide-methionine (S)-S-oxide reductase	LOC107805741	2602900	3.14764e+06	2.70277e+06	2.74652e+06	2.70611e+06	2.71028e+06
A0A1S3XFC3	Nascent polypeptide-associated complex subunit beta	LOC107764413	5344900	5.29494e+06	5.69767e+06	6.30593e+06	6.35865e+06	5.89612e+06
A0A076L2E2	40S ribosomal protein S25	LOC107768022	359580	48457.3	398936	409014	27584.1	298168
A0A1S4CUN3	3-deoxy-8-phosphooctulonate synthase	LOC107822777	88202	63696.4	83343.3	80080.9	79164	86662.3
A0A1S4AQ81	remorin-like	LOC107800107	2692200	2.65004e+06	1.53152e+06	1.63622e+06	2.48227e+06	1.45279e+06
A0A076L2G1	Sulfurtransferase	LOC107787523	163100	59724.8	123554	96116.5	160649	140800
A0A076L4P6	Importin subunit alpha		104250	74541.9	111141	78495	0	105167
A0A1S4ANZ1	Glutamine--fructose-6-phosphate transaminase (isomerizing)	LOC107799616	20219	23037.8	14084	19688.5	18520.1	12762.8
A0A076L4Q6	Aminoaldehyde dehydrogenase 2		36699	39086.5	589721	183402	33667.6	45162.1
A9CM20	Voltage-dependent anion channel	NtVDAC1	804570	871029	736211	1.38048e+06	1.52702e+06	1.28845e+06
A0A1S4A4A8	uncharacterized protein Os08g0359500-like isoform X2	LOC107793601	705720	804218	518366	553645	1.02661e+06	503888
A0A077D7Q3	Asparagine--tRNA ligase		103080	139079	44803.2	35637.1	119687	108858
A0A1S3ZGB5	protein NRT1/ PTR FAMILY 8.3-like isoform X2	LOC107786525	72004	24115.5	62708.2	257934	185981	190956
A0A1S4A804	Ammonium transporter	LOC107794756	72896	94283.6	98279.4	74981.4	96447.9	83834.3
A0A1S3X7H3	Glutathione transferase	LOC107761963	56806	66776.7	0	0	17173.8	94584.3
A0A077D837	Glutathione synthetase	LOC107832748	24515	27863	62590.9	62061.1	181761	66916.4
A0A077D9P0	40S ribosomal protein S17	LOC107769059	987330	1.20583e+06	1.06643e+06	1036383	1.56257e+06	1.13992e+06
A0A077D9R7	L-lactate dehydrogenase	LOC107806030	53252	54637.8	315876	153384	51195.8	39365.7
A0A077DBL0	Xyloglucan-specific fungal endoglucanase inhibitor protein		165410	55920.8	137261	129612	28502.6	285173
A0A077DBL2	20 kDa chaperonin, chloroplastic-like	LOC107831277	2484100	2.302e+06	2.07646e+06	2.32482e+06	1.8199e+06	1.71358e+06
A0A077DBL4	Calnexin-like protein		2081500	2.25194e+06	2674164	2.80293e+06	3.36779e+06	1.83701e+06
A0A1S4B576	Threonine dehydratase	LOC107804602	284930	255117	253093	376335	319222	249008
A0A1S4D3J2	mitochondrial uncoupling protein 1-like	LOC107825495	175890	703954	647329	234735	116614	118382
A0A1S3X5I0	Carbonic anhydrase	LOC107761423	2965500	3.63079e+06	3.34445e+06	2520060	2.9209e+06	3.69392e+06
A0A1S3ZYK1	elongation factor 1-delta 1-like isoform X2	LOC107791787	9289500	9.98608e+06	8.51618e+06	9.42737e+06	7.92087e+06	8300042
A0A1S3YSP2	metal transporter Nramp3-like	LOC107779295	18478	24821.5	27929.4	33354.1	35993.2	33197.7
A0A097BTV9	V-type proton ATPase catalytic subunit A	LOC107818091	269130	179214	179029	103730	195442	138146
A0A1S4BSD0	betaine aldehyde dehydrogenase, chloroplastic-like isoform X2	LOC107811392	76298	44500.4	224739	163305	43071	125140
A0A097BTX9	Mitochondrial carnitine/acylcarnitine carrier-like protein-like isoform 1	LOC107790364	2864700	4.00491e+06	3.12116e+06	3.54098e+06	2.92836e+06	4.02261e+06
A0A1S4CDT5	protein mago nashi homolog	LOC107817934	64145	71497.2	51143.2	193435	237252	119146
A0A1S4BY15	60S ribosomal protein L2, mitochondrial-like	LOC107812987	22300	20134.5	22695.3	32679.4	16570.6	2152.8
A0A1S3ZS56	universal stress protein A-like protein	LOC107789885	177040	78107.1	153738	112259	88968.8	203453
A0A1S4DJ12	Succinate--CoA ligase [ADP-forming] subunit alpha, mitochondrial	LOC107830273	1337500	1.16383e+06	1.21512e+06	1.24524e+06	1.29744e+06	1.06966e+06
A0A097BU11	Nucleobase-ascorbate transporter 6-like isoform 1		119960	120625	105248	0	0	349142
A0A1S3ZZH1	subtilisin-like protease SBT1.7	LOC107792103	55053	91622.3	52355.2	44604.5	26631.1	49368
A0A1S4CCD8	carotenoid 9,10(9,10)-cleavage dioxygenase-like isoform X3	LOC107817468	238450	210332	224759	221139	143344	217853
A0A1S3XKW8	cell division topological specificity factor homolog, chloroplastic-like	LOC107766240	95809	89847	83501	121718	100066	86452.1
A0A0A8WH00	Aquaporin PIP1 5	LOC107806766	52665	53470	80375.5	48436.5	0	45780.3
A0A0A8WH05	Aquaporin PIP2 4a	LOC107792086	2159900	2.2997e+06	1.77119e+06	1.95595e+06	1.93664e+06	1.8317e+06
A0A0A8WH07	Aquaporin PIP2 7a	LOC107789972	13224000	1.54339e+07	10948354	1.09249e+07	1.48218e+07	1.01408e+07
A0A0A8WH11	Aquaporin PIP2 10	LOC107794452	165850	280662	137231	251238	218675	213694
A0A0A8WHB3	Aquaporin PIP1 2b	LOC107779998	618470	0	561539	533190	707250	520224
A0A0A8WK74	Aquaporin PIP2 3b	LOC107762778	125870	138849	111273	0	144698	153652
A0A0A8WK75	Aquaporin PIP2 6b	LOC107815182	2360200	4.61102e+06	3.76213e+06	2.32216e+06	4.3712e+06	2.80572e+06
A0A1S4BCP4	aquaporin PIP2-1-like	LOC107806939	3809500	3.06909e+06	4.54593e+06	1.77669e+06	3759639	4.41789e+06
A0A0A8WK03	Aquaporin PIP1 2a	LOC107812756	233110	136021	188319	204717	0	190336
A0A0A8WK08	Aquaporin PIP2 8	LOC107824457	932970	1.00505e+06	1.01316e+06	875433	802603	971623
A0A0A8WK73	Aquaporin PIP1 4	LOC107817177	116120	131727	187914	249641	142874	350060
A0A0A8WK76	Aquaporin PIP2 9b	LOC107763243	862830	2163538	975698	1.0631e+06	1.22049e+06	1.30305e+06
Q9MB66	Thionin like protein	Nt-thionin	2518000	3.34716e+06	2.61099e+06	3.65473e+06	3.02996e+06	3.2e+06
A0A1S4BAR2	betaine aldehyde dehydrogenase, chloroplastic-like	LOC107806351	2273000	1465261	1.91856e+06	1.74597e+06	1.99191e+06	1.43333e+06
A0A0C4FSU3	DEF2 protein	DEF2	66620	0	56308.6	0	0	44198.8
A0A0C4FSU4	BADH2 protein	BADH2	58376	53030.1	45864.6	53933.3	73031.1	41767.9
A0A0C4Y311	Nicotiana tabacum cultivar SR1 cystathionine gamma synthase 1 mRNA	LOC107774020	586680	898795	1.03085e+06	954326	920753	775580
Q9ZR68	Aquaporin 1	aqp1	3735300	4.43967e+06	3.76758e+06	3.61378e+06	4.05963e+06	4.33947e+06
A0A0D3QSL6	50S ribosomal protein L22, chloroplastic	RPL17	521260	397495	481633	617294	610693	596900
A2V884	Translationally controlled tumor protein like protein (Fragment)	RsRG3-8	5031500	1.77937e+06	4.76376e+06	3780653	5.62231e+06	4.94687e+06
A0A0F7R4E4	Methyltransferase	GLMT1	214960	221423	393963	492156	343912	299418
A0A1S3XZF4	heterodimeric geranylgeranyl pyrophosphate synthase small subunit, chloroplastic-like	LOC107770520	2123700	1.04712e+06	1582260	2.2334e+06	1.83573e+06	1.73714e+06
A0A0H3U4Y9	Polygalacturonase inhibiting protein	PGIP2	681830	886593	211810	656864	768946	201142
A0A0H3U5M2	Polygalacturonase inhibiting protein	PGIP1	865420	629780	1.09787e+06	873907	798199	826985
A0A1S4DN81	vesicle transport v-SNARE 12-like	LOC107831362	0	72668.1	17557.2	47400.5	47505.5	0
A0A1S3Y9J9	sorting nexin 1	LOC107774006	51774	61645.7	0	65530.8	70098.9	73705.9
A0A0K2GN10	Glyceraldehyde-3-phosphate dehydrogenase	GAPC1	0	875218	756024	756294	618812	739957
A0A1S3ZWT0	probable carotenoid cleavage dioxygenase 4, chloroplastic	LOC107791323	124770	119860	17226.7	0	131464	185205
A0A1S4CC34	carotenoid 9,10(9,10)-cleavage dioxygenase 1-like isoform X1	LOC107817469	392690	421459	417849	549601	204031	454540
A0A1S4BY78	gibberellin-regulated protein 1-like isoform X2	LOC107813154	46104	68677.7	0	0	17242.6	57392.9
A0A0R4WFQ1	Mannose-binding lectin	MBL2	450750	461803	381843	321050	379152	325773
U3GKW9	Snakin-1	SN1	55222	75391.3	48334.1	70521.8	80884.1	0
A0A0R4WFW8	Mannose-binding lectin	MBL1	2079700	3.13999e+06	2.2204e+06	1189542	1.29354e+06	1.02209e+06
A0A0R4X9V9	Mannose-binding lectin	MBL3	797330	859644	421316	748380	620624	816456
A0A0S0N610	Tubulin beta chain	TUB1	2017200	1.11251e+06	1.33258e+06	1.5193e+06	1.03443e+06	1630081
A0A1S3YYR6	Tubulin beta chain	LOC107781181	0	86279.7	70910.1	85212.1	101328	0
A0A0S1TP11	Glycine-rich RNA-binding protein	GRBP1	1033900	961113	929250	0	1.11388e+06	0
A0A0U3BZQ6	ABC transporter G family-like protein (Fragment)		236570	255829	204067	0	176658	240404
A0A139ZSG9	6-phosphogluconate dehydrogenase, decarboxylating	LOC107779182	816710	760019	382237	959158	340048	474492
A0A140G1P2	Photosystem II protein D1	psbA	56298000	7.04017e+07	60893712	4.92259e+07	3.74874e+07	4.95749e+07
P06374	30S ribosomal protein S16, chloroplastic	rps16	2068800	2.21015e+06	1852153	1.94674e+06	1.58e+06	1.9027e+06
A0A140G1P7	ATP synthase subunit alpha	atpA	13720000	1.40493e+07	14471114	1.56189e+07	7.63716e+06	1.58474e+07
Q36600	ATPase subunit I		17783000	1.64635e+07	1.90431e+07	1.74597e+07	1.60764e+07	1.84508e+07
P69372	ATP synthase subunit a, chloroplastic	atpI	3979900	4.55613e+06	4.65833e+06	4.4884e+06	3.06367e+06	4.73873e+06
P06355	30S ribosomal protein S2, chloroplastic	rps2	1305400	1.41509e+06	7.82548e+06	582056	1.41131e+06	873059
A0A140G1Q2	DNA-directed RNA polymerase	rpoC2	1661000	2.16123e+06	1.42376e+06	1.58995e+06	2.00579e+06	1.35514e+06
A0A140G1Q3	DNA-directed RNA polymerase subunit gamma	rpoC1	200040	149029	186641	280160	174972	183867
P06271	DNA-directed RNA polymerase subunit beta	rpoB	1379200	934457	851184	1.3296e+06	931452	1256818
A0A140G1Q7	Photosystem II D2 protein	psbD	81126000	9.20046e+07	8.48323e+07	8.00993e+07	8.29093e+07	7.64642e+07
A0A140G1Q8	Photosystem II CP43 reaction center protein	psbC	82780000	1.01598e+08	9.42543e+07	9.09556e+07	9.68607e+07	7.8091e+07
P06371	30S ribosomal protein S14, chloroplastic	rps14	173790	374610	324195	581922	94082.1	840068
P06407	Photosystem I P700 chlorophyll a apoprotein A2	psaB	80746000	9.92e+07	9.77467e+07	8.41402e+07	6.80393e+07	1.06624e+08
P06405	Photosystem I P700 chlorophyll a apoprotein A1	psaA	44647000	5.08893e+07	4.44444e+07	3.35005e+07	4.56294e+07	4.7572e+07
P12204	Photosystem I assembly protein Ycf3	ycf3	410980	230828	326217	394436	298604	270231
P06359	30S ribosomal protein S4, chloroplastic	rps4	5275500	3.6267e+06	3.89657e+06	2.70404e+06	3.47203e+06	3.00291e+06
A0A140G1R8	NADH-quinone oxidoreductase subunit C	ndhJ	2036200	2.04623e+06	2.02268e+06	1.14501e+06	1.48964e+06	2157626
A0A140G1R9	NADH-quinone oxidoreductase subunit B	ndhK	2422600	2.49241e+06	2.10941e+06	2.27947e+06	2.33181e+06	2.31854e+06
P00834	ATP synthase epsilon chain, chloroplastic	atpE	14512000	1.51407e+07	1.63361e+07	15826775	18025855	1.60564e+07
A0A140G1S2	ATP synthase subunit beta	atpB	212350000	2.32515e+08	2.55913e+08	260831068	253146351	2.03697e+08
P00876	Ribulose bisphosphate carboxylase large chain	rbcL	816620000	7.32212e+08	7.76079e+08	8.18326e+08	8.31822e+08	6.80555e+08
P12219	Acetyl-coenzyme A carboxylase carboxyl transferase subunit beta, chloroplastic	accD	1539200	1.64017e+06	763807	965547	984536	784129
P12207	Photosystem I assembly protein Ycf4	ycf4	949400	962632	317908	358654	1452825	501997
P06449	Cytochrome f	petA	43067000	4.89894e+07	39401338	4.12649e+07	4.6728e+07	51541261
P60139	Photosystem II reaction center protein L	psbL	1201800	1.91175e+06	1.52838e+06	1.42573e+06	1.45844e+06	1.28391e+06
A0A140G1T3	Cytochrome b559 subunit alpha	psbE	20491000	2.71372e+07	1.54162e+07	21159699	2.47229e+07	2.3431e+07
P06393	50S ribosomal protein L33, chloroplastic	rpl33	107750	112927	105066	112586	131051	110341
P69660	30S ribosomal protein S18, chloroplastic	rps18	1232800	1.25233e+06	1.14649e+06	1.33564e+06	1.32427e+06	1.41475e+06
P06386	50S ribosomal protein L20, chloroplastic	rpl20	489200	160351	647784	4.87478e+06	6.36828e+06	470599
P12210	ATP-dependent Clp protease proteolytic subunit	clpP	1640900	1.76104e+06	1.14659e+06	1.64011e+06	1.32267e+06	876908
P06411	Photosystem II CP47 reaction center protein	psbB	99340000	1.26155e+08	1.35411e+08	1.14849e+08	1.33379e+08	1.42968e+08
P06249	Cytochrome b6-f complex subunit 4	petD	6630800	7.38234e+06	6.39404e+06	6.34955e+06	6.9764e+06	7.474e+06
P06269	DNA-directed RNA polymerase subunit alpha	rpoA	137910	193867	120431	183914	81774	150898
P69656	30S ribosomal protein S11, chloroplastic	rps11	2257400	2.24984e+06	918708	2.09273e+06	0	813691
P06363	30S ribosomal protein S8, chloroplastic	rps8	4452800	4.18683e+06	4.47648e+06	4.98524e+06	4.92658e+06	4.4754e+06
P06382	50S ribosomal protein L14, chloroplastic	rpl14	3327100	3.58439e+06	3.16816e+06	2.86221e+06	3.0709e+06	3.41787e+06
P06384	50S ribosomal protein L16, chloroplastic	rpl16	2928800	1.48715e+06	2.13579e+06	2.58855e+06	1967833	2.71603e+06
P06357	30S ribosomal protein S3, chloroplastic	rps3	5661300	7.14941e+06	6.86549e+06	3.74042e+06	5.56245e+06	3.42572e+06
P06389	50S ribosomal protein L22, chloroplastic	rpl22	868960	874967	868196	1.28977e+06	637860	620811
P02376	30S ribosomal protein S19, chloroplastic	rps19	1549100	2.08237e+06	2.49413e+06	975232	1.51303e+06	967310
P62732	30S ribosomal protein S7, chloroplastic	rps7-A	6331300	6.1719e+06	6.17519e+06	6.40207e+06	6.35005e+06	7.11677e+06
Q70CV7	NAD(P)H-quinone oxidoreductase subunit 5, chloroplastic (Fragment)	ndhF	48450000	50159268	5.57455e+07	5.60228e+07	3.63671e+07	5.38605e+07
P06262	NAD(P)H-quinone oxidoreductase chain 4, chloroplastic	ndhD	114790	52026.7	122220	80230.4	7829.5	145932
P62094	Photosystem I iron-sulfur center	psaC	66795000	74919980	5.51077e+07	4.7552e+07	5.40925e+07	6.83939e+07
P06252	NAD(P)H-quinone oxidoreductase subunit I, chloroplastic	ndhI	1357000	1.51669e+06	1.05824e+06	1.24698e+06	20817.1	1.42492e+06
A0A140G1X4	NADH-quinone oxidoreductase subunit H	ndhA	1895600	1.55774e+06	1.82516e+06	1.43546e+06	1432298	1404796
P12133	NAD(P)H-quinone oxidoreductase subunit H, chloroplastic	ndhH	2349900	3.34915e+06	2.53265e+06	3.55091e+06	3.69382e+06	3.91456e+06
P06373	30S ribosomal protein S15, chloroplastic	rps15	1107600	1.0504e+06	1.06946e+06	1.1488e+06	1.12147e+06	209879
P12222	Protein TIC 214	TIC214	1694800	1.58906e+06	1.15579e+06	990118	1718643	922496
A0A140G1Y2	Protein Ycf2	ycf2	641080	725048	738112	627358	787018	1.29077e+06
P06391	50S ribosomal protein L23, chloroplastic	rpl23-A	697670	28019.1	458858	727782	684590	769066
A0A140G1Y4	ribosomal protein L2	rpl2	8735600	8.16964e+06	5.74842e+06	7.90684e+06	8.07362e+06	7.26818e+06
A0A6J3ZX44	Ribosomal protein S12 (Fragment)	rps12	248690	572154	529202	601559	193870	434998
A0A1S3ZTZ5	GTP-binding protein SAR1A-like	LOC107790375	81857	86055.5	71057.7	92193.3	262091	0
X5CLZ0	diacylglycerol kinase		59136	58739.3	14392.3	903.9	54144.1	18477.3
I7FJJ6	Mitogen-activated protein kinase	MPK2	25639	20990.2	20111.6	13571.4	17475.4	0
A0A1S3X6Y3	uncharacterized protein sll1770-like isoform X2	LOC107761847	2334200	1379063	1.99155e+06	3.04404e+06	2.16152e+06	1.11625e+06
A0A1S3XJN0	eukaryotic translation initiation factor 2 subunit alpha-like	LOC107765718	627130	541005	632004	608019	416479	613788
A0A1J0F5X8	E3 ubiquitin ligase HOS1b		69952	25484.4	21765.3	515089	24428.2	42048.8
A0A1S3WX25	Glucose-6-phosphate 1-dehydrogenase	LOC107758909	88640	34797.6	73337.1	83227	20099.2	92846.8
A0A1S4D952	acyl-protein thioesterase 2-like isoform X2	LOC107827345	218290	320095	383976	392501	372547	296365
A0A1S3WX93	Nucleolar protein 10	LOC107758953	30878	20859.3	0	0	78725.9	0
A0A1S3XV16	transcription factor DIVARICATA-like	LOC107769058	19380	23961.6	21385.2	18194.8	25964.8	16535.3
A0A1S4CN25	uncharacterized protein LOC107820817	LOC107820817	407610	399066	894336	183852	383957	514937
A0A1S3WXG3	NADH--cytochrome b5 reductase 1-like	LOC107759015	661910	807999	830148	969110	826524	952523
A0A1S3WXH3	extensin-2-like	LOC107759023	1084200	737113	897965	920500	1.36498e+06	1.12388e+06
A0A1S3WXK3	rhodanese-like domain-containing protein 10 isoform X2	LOC107759045	407010	380905	361616	286068	458221	287905
A0A1S3XFM7	ras-related protein RABA5c-like	LOC107764506	0	224282	0	0	0	0
A0A1S4AGK6	Transmembrane 9 superfamily member	LOC107797386	367660	442972	170629	338383	155500	64112.8
A0A1S4C3Z3	WD-40 repeat-containing protein MSI4-like	LOC107814868	53701	41652.6	39932	23582	46608.7	12635.6
A0A1S3WXP0	Serine hydroxymethyltransferase	LOC107759094	82444	94287.8	0	93293.9	0	0
A0A1S3WXP3	geraniol 8-hydroxylase-like	LOC107759080	202160	454514	87736.4	371083	120478	313331
A0A1S3WXP6	Methyltransferase	LOC107759039	3124300	1.86514e+06	1.35189e+06	2.03069e+06	1.67426e+06	4.27688e+06
A0A1S3WXS1	14-3-3 protein 9-like isoform X2	LOC107759102	82545	93890.9	13705.9	105328	15144.1	150179
Q6IVK2	UDP-glucuronate decarboxylase (Fragment)		143240	141572	118541	144682	75470.3	184873
A0A1S4CD43	serine carboxypeptidase-like 18 isoform X2	LOC107817712	0	0	0	89232.5	78841.8	0
A0A1S4DSB7	uncharacterized protein LOC107832682	LOC107832682	131770	156612	130014	47780.3	41394.4	111481
A0A1S3WXV2	bifunctional monothiol glutaredoxin-S16, chloroplastic-like	LOC107758982	227360	223727	200722	162435	233755	166072
A0A1S3ZAS7	Peroxidase	LOC107784680	24763	25952.6	44778	30537.6	25191.9	31059.9
A0A1S4C7H9	translation initiation factor eIF-2B subunit beta-like isoform X2	LOC107815973	54674	62772.7	52632.2	50229.2	42135.2	56937.3
A0A1S3WXX4	Transmembrane 9 superfamily member	LOC107759103	64230	3458	6752.5	0	0	0
A0A1S3WXY4	Beta-glucosidase	LOC107759116	855600	845159	1.00121e+06	797727	755288	865893
A0A1S4AVU6	Serine/threonine-protein phosphatase	LOC107801901	30273	48284.5	0	0	10151.7	76031.7
A0A1S3WXZ7	Exocyst complex component Sec8	LOC107758906	99659	228598	111707	112668	107519	257468
A0A1S3ZW93	60S ribosomal protein L21-2-like	LOC107791104	505830	421281	478084	503295	571130	418530
A0A1S3Z0A4	Phosphoinositide phospholipase C	LOC107781653	42692	0	46293.2	27366.9	5139.3	47338.6
A0A1S3ZZ96	U1 small nuclear ribonucleoprotein 70 kDa-like	LOC107792003	175870	74725.2	12000.6	6169	37364.7	0
A0A1S3WY30	vacuolar-sorting receptor 1-like	LOC107759156	430930	451089	384239	385805	474745	297261
A0A1S4DLA0	60S ribosomal protein L35-like	LOC107830981	981040	1.0274e+06	842592	1.13764e+06	1.22026e+06	702918
A0A1S3WY43	H/ACA ribonucleoprotein complex subunit 4-like	LOC107759237	211110	116320	154668	93026.7	222769	45289.2
A0A1S3Y8C8	O-fucosyltransferase family protein	LOC107773678	82444	74422.5	68892.4	36495.1	150397	34684.2
A0A1S3WY66	Transcription elongation factor 1 homolog	LOC107759182	0	0	30904.3	0	0	0
A0A1S3WY84	bifunctional epoxide hydrolase 2-like	LOC107759209	190140	296728	207150	196168	55978.9	61285.9
A0A1S4DFT4	malignant T-cell-amplified sequence 1 homolog	LOC107829156	0	157817	0	169058	0	0
A0A1S3WY98	KH domain-containing protein At4g18375-like	LOC107759303	23039	19736.5	20591.7	20644.7	22276.9	19728.2
A0A1S3WYA8	20 kDa chaperonin, chloroplastic-like	LOC107759119	1645900	1.75161e+06	914169	2268617	1762449	1892637
A0A1S3WYC1	Fumarate hydratase	LOC107759249	38311	56909.5	31817	26503.9	65819.2	14643
A0A1S3WYF7	uncharacterized protein LOC107759286	LOC107759286	105720	67603.1	105865	71548.6	84037.7	91790.6
A0A1S3WYG1	60S ribosomal protein L22-3-like	LOC107759189	153690	0	201641	0	6171.3	0
A0A1S3WYG6	L-ascorbate peroxidase 1, cytosolic	LOC107759348	1062000	1.21012e+06	1.06805e+06	690823	667859	958727
A0A1S3WYI2	protease Do-like 8, chloroplastic	LOC107759360	31484	20537.7	29607.4	0	0	36945.8
A0A1S3WYL9	Werner Syndrome-like exonuclease	LOC107759394	0	52123.1	0	45096.9	59385.9	0
A0A1S3WYM6	actin-101	LOC107759349	292550	205032	287916	194715	214730	311782
A0A1S4CPJ5	NAP1-related protein 2-like	LOC107821085	35486	47507.3	86921.7	5084	97746	0
A0A1S3WYR5	extensin-like isoform X2	LOC107759431	207860	202267	302907	86709.9	395470	88627.6
A0A1S3WYR8	Fructose-bisphosphate aldolase	LOC107759369	8742400	8848438	9.77346e+06	5.9988e+06	7562052	9.05984e+06
A0A1S3WYS6	uncharacterized protein At2g27730, mitochondrial-like	LOC107759442	101430	103662	83313	85816.2	102339	79740
A0A1S3WYW8	intracellular ribonuclease LX-like	LOC107759406	30064	31291	34494.7	26556.1	22858.3	36534.4
A0A1S3WZ09	60S ribosomal protein L30-like	LOC107759448	161770	112204	130226	571889	164995	106758
A0A1S4C071	protein FMP32, mitochondrial-like	LOC107813696	35978	35763.3	32034.4	33448.3	34244.4	34236.2
A0A1S3YTD9	uncharacterized protein YKR070W-like	LOC107779499	53402	47862.4	46678.3	44716.1	39277.5	52862.9
A0A1S3YWM6	Phospholipase D	LOC107780667	33502	31503.6	186570	154889	180499	225462
A0A1S3WZ56	bifunctional dTDP-4-dehydrorhamnose 3,5-epimerase/dTDP-4-dehydrorhamnose reductase	LOC107759475	728840	434142	895428	817722	625922	593339
A0A1S3WZ66	ACT domain-containing protein DS12, chloroplastic-like	LOC107759486	555400	607701	564248	597044	516464	395117
A0A1S4A4R1	Protein TIC 20	LOC107793677	1200200	1.13597e+06	770105	669661	15170.4	0
A0A1S4DHL0	probable LRR receptor-like serine/threonine-protein kinase At5g10290	LOC107830000	69136	76996.9	12571.8	8591.9	52401	45983.8
A0A1S3WZ87	protein STRICTOSIDINE SYNTHASE-LIKE 6-like	LOC107759420	340890	89803	305768	295497	101504	57808.8
A0A1S3WZ92	Reticulon-like protein	LOC107759445	103430	367111	106734	65274.8	126808	500349
A0A1S4C1K4	ATP synthase subunit O, mitochondrial-like	LOC107814191	1819600	2.29645e+06	1.37746e+06	1.38939e+06	2.33365e+06	1.69013e+06
A0A1S4DAS5	Ubiquitin carboxyl-terminal hydrolase	LOC107827849	0	0	0	15623	0	0
A0A1S3WZE1	Peroxidase	LOC107759554	0	96951.3	47578	0	0	44961.9
A0A1S3WZE3	coatomer subunit beta-1-like	LOC107759478	302930	0	329290	404100	230418	348279
A0A1S3WZF8	membrane-associated 30 kDa protein, chloroplastic-like	LOC107759493	1869200	4568598	3.85623e+06	4.48625e+06	5165791	4.07902e+06
A0A1S3ZKA1	Pectate lyase	LOC107787860	15719	19369.9	19500	55176.2	40526.4	0
A0A1S3WZJ6	Starch synthase, chloroplastic/amyloplastic	LOC107759522	5547000	5379676	6.56921e+06	5.74807e+06	4.95192e+06	7.08359e+06
A0A1S3XUW8	COP9 signalosome complex subunit 8	LOC107768852	43747	47642.5	44439.3	47564.3	0	44048.4
A0A1S3WZM1	putative septum site-determining protein minD homolog, chloroplastic	LOC107759529	251670	178334	172630	303042	180545	163428
A0A1S4DC28	glutathionyl-hydroquinone reductase YqjG-like isoform X2	LOC107828221	86971	70314.7	157468	105880	87125.9	124830
A0A1S3WZQ8	Aconitate hydratase	LOC107759563	1489300	0	1.35058e+06	1.36481e+06	92512.2	1.73659e+06
A0A1S3WZT4	serine/threonine-protein kinase HT1-like	LOC107759674	40451	238464	197598	103945	159353	64202.3
A0A1S3WZX1	elongation factor 1-beta-like	LOC107759618	1448000	0	1.29609e+06	1.46812e+06	1.62014e+06	0
A0A1S4BMU6	protein GPR107-like	LOC107810012	113010	49084.7	61706.4	132868	140443	117652
A0A1S3WZY8	Diphosphomevalonate decarboxylase	LOC107759723	26754	30315.9	27728.2	33310	31337.4	31255.7
A0A1S3WZZ3	alpha-glucosidase-like	LOC107759721	615810	703964	670295	667767	941498	700098
A0A1S3X013	non-specific lipid transfer protein GPI-anchored 2-like	LOC107759803	140600	477430	400078	94590	0	85165.9
A0A1S3X040	Adenine phosphoribosyltransferase	LOC107759759	2513300	2.17401e+06	2445311	2.35216e+06	2.29741e+06	1.72906e+06
A0A1S3X050	ras-related protein RABE1a-like	LOC107759767	16203	15100.9	11708.5	15154.1	15810.3	12851.3
A0A1S3X073	phosphoglycolate phosphatase 1B, chloroplastic-like	LOC107759700	10161000	1.30784e+07	1.129e+07	1.10764e+07	1.23368e+07	1.41232e+07
A0A1S4AAS5	frataxin, mitochondrial-like	LOC107795592	22908	23395	25387.1	26452.7	18402	24097.9
A0A1S3X092	beta-carotene isomerase D27, chloroplastic-like	LOC107759732	164420	185561	171417	160254	156142	143289
A0A1S4DNY4	xylulose 5-phosphate/phosphate translocator, chloroplastic-like	LOC107831852	13173	17439.6	9460.4	9305.5	0	14628.6
A0A1S3X0C4	serine/threonine-protein phosphatase 2A 65 kDa regulatory subunit A beta isoform-like	LOC107759848	591900	550484	452986	387351	583217	545263
A0A1S3X0F2	Protein DETOXIFICATION	LOC107759866	0	57854.2	38074.1	39957.5	44920.7	55005.1
A0A1S4CPK8	subtilisin-like protease SBT1.8	LOC107821261	101450	91208.6	0	134905	108521	37993.2
A0A1S3X0H2	Transcription elongation factor SPT5	LOC107759904	0	159094	12791.1	161216	73175.6	13761.5
A0A1S3X0I4	Ribosomal protein L19	LOC107759916	287250	278054	262787	226186	357237	187107
A0A1S3X0Z6	glutathione S-transferase L3-like isoform X2	LOC107759987	761960	812576	569201	806286	599237	696006
A0A1S4CGS9	diacylglycerol kinase	LOC107818851	458040	368274	381287	377236	451753	98959.5
A0A1S4BM22	anamorsin homolog	LOC107809741	2738100	2.31949e+06	2.34463e+06	2.79925e+06	2.8826e+06	35372.1
A0A1S3X0K2	uncharacterized protein LOC107759934 isoform X1	LOC107759934	193050	197564	249494	174577	204753	255411
A0A1S3X0L3	LOW QUALITY PROTEIN: G-type lectin S-receptor-like serine/threonine-protein kinase At2g19130	LOC107760015	26398	28931.3	25027.3	21873.3	12546.7	21231.2
A0A1S3X0M5	60S ribosomal protein L4-like	LOC107759872	347210	260018	300946	341188	444563	382719
A0A1S4C5I3	Beta-ketoacyl-[acyl-carrier-protein] synthase III	LOC107815403	3533000	3.60157e+06	4.12047e+06	3.99626e+06	3.41836e+06	4.02527e+06
A0A1S3X0P4	uncharacterized protein LOC107760047	LOC107760047	128100	134010	57281	59763.8	135042	66017.2
A0A1S4BF20	Dirigent protein	LOC107807552	179270	26171.5	16520.1	8155.2	0	5570.5
A0A1S3X0T3	glycine-rich RNA-binding protein-like isoform X1	LOC107760024	68257	68521.6	190542	46268.2	237367	169600
A0A1S3YY28	protein LHCP TRANSLOCATION DEFECT-like	LOC107781119	895990	451581	576065	624543	420733	1.03789e+06
A0A1S3YU22	cytochrome c1-1, heme protein, mitochondrial	LOC107779532	1844500	1.29747e+06	1.04601e+06	1.16262e+06	1522433	1267767
A0A1S3ZTK5	CBS domain-containing protein CBSX1, chloroplastic-like	LOC107790338	605900	483107	614062	1.26213e+06	933849	856636
A0A1S3X0Y5	Ferredoxin--NADP reductase, chloroplastic	LOC107760150	3449200	3.11947e+06	3.71007e+06	4.114e+06	1.24434e+06	3.8774e+06
A0A1S4A5I6	thylakoid lumenal 17.4 kDa protein, chloroplastic-like	LOC107793983	2308300	2.75258e+06	1.00081e+06	1.11061e+06	1.10527e+06	2.268e+06
A0A1S4A5K4	chromophore lyase CRL, chloroplastic-like isoform X2	LOC107793916	0	12772.6	0	31860.4	33479.5	0
V5Z2L2	HCpro-interacting protein 2	hip2	20246	16843.7	16153.1	15721.3	17418.1	17123.6
A0A1S3X119	5-3 exoribonuclease 2-like	LOC107760109	164430	173255	53981.6	138263	45935.6	154791
A0A1S3X130	stress protein DDR48-like	LOC107760194	2081000	1.63755e+06	1.39728e+06	2.09038e+06	1251684	1.7242e+06
A0A1S3ZQT7	uncharacterized protein LOC107789386	LOC107789386	220640	140556	222323	284808	311952	153630
A0A1S4AQR4	probable sodium-coupled neutral amino acid transporter 6	LOC107800438	0	105784	0	222685	0	280318
A0A1S3X1A6	myosin-9-like	LOC107759966	4987100	4.62725e+06	3.60959e+06	4.29992e+06	5.76841e+06	5.01477e+06
A0A1S3X1A8	NAD(P)H-quinone oxidoreductase subunit N, chloroplastic-like	LOC107760205	142600	176104	168516	185664	121808	163207
A0A1S4A559	probable leucine-rich repeat receptor-like protein kinase At1g35710	LOC107793870	0	0	16288.6	29161.6	0	11804
A0A1S4C6K5	uncharacterized protein LOC107815611	LOC107815611	91400	94907.9	86884.3	83900.6	85205.1	66200.8
A0A1S4ALQ5	Pyruvate dehydrogenase E1 component subunit alpha	LOC107799031	711540	1.14843e+06	1.1565e+06	692625	1.01366e+06	1.28646e+06
A0A1S3YJT0	V-type proton ATPase subunit E-like	LOC107777047	2998000	2.68869e+06	2.53528e+06	3.06267e+06	2.26473e+06	2892097
A0A1S4A718	vacuolar protein sorting-associated protein 53 A-like isoform X2	LOC107794431	33478	36306.8	29882.3	35700.6	34340.8	27460
A0A1S3XI75	4-hydroxy-3-methylbut-2-enyl diphosphate reductase, chloroplastic-like	LOC107765472	3612000	3.04688e+06	4.03758e+06	5.08547e+06	2.87583e+06	4.93293e+06
A0A1S4B2Y7	50S ribosomal protein L6, chloroplastic-like	LOC107803875	5159600	3.89577e+06	3.17544e+06	4.18781e+06	3.59003e+06	3029679
A0A1S3X1J4	plastid lipid-associated protein 3, chloroplastic-like	LOC107760189	158450	160791	185144	146709	130214	175682
A0A1S3X1L9	Fructose-bisphosphatase	LOC107760211	1125800	1.12801e+06	1.07816e+06	1.06228e+06	962954	865926
A0A1S3X1Q2	40S ribosomal protein S7	LOC107760389	0	0	164483	176440	104270	0
A0A1S3X1Q4	1,3-beta-glucan synthase	LOC107760121	254790	192139	229732	202710	277962	154702
A0A1S3X1S5	Pyruvate dehydrogenase E1 component subunit alpha	LOC107760338	1769500	1.61472e+06	1.74066e+06	2.94002e+06	1.87231e+06	1.38732e+06
A0A1S4BPE9	Signal recognition particle subunit SRP68	LOC107810486	137220	136943	32716.7	274171	132840	149847
A0A1S3X1W2	FKBP12-interacting protein of 37 kDa-like	LOC107760369	0	14500.7	22219.2	0	0	0
A0A1S3X1X7	transformation/transcription domain-associated protein-like	LOC107760306	6518.6	2579	4485.3	5024.4	3972.5	0
A0A1S3X1Y4	protochlorophyllide-dependent translocon component 52, chloroplastic-like	LOC107760466	458360	497613	666373	685929	706149	750330
A0A1S3X220	Ubiquitinyl hydrolase 1	LOC107760236	254850	88399.5	119380	127554	238434	67060.2
A0A1S3X228	Protein-serine/threonine phosphatase	LOC107760360	224500	118541	220170	63599.9	534526	114102
A0A1S3X240	guanylate-binding protein 5-like	LOC107760512	112390	229530	158115	99231.9	91669.4	79011.2
A0A1S4A5R5	nephrocystin-3-like	LOC107794015	282800	393191	361485	431149	336607	125903
A0A1S4B8K7	Cellulose synthase	LOC107805577	268040	110067	120805	242464	0	232054
A0A1S3X265	putative oligosaccharyltransferase complex subunit CG9662	LOC107760274	14264	14176.1	15689.2	12572.1	11864.3	10587.1
A0A1S3X2N7	sister chromatid cohesion 1 protein 4-like isoform X2	LOC107760537	151110	0	162947	142594	285095	9142.8
A0A1S4AH37	probable leucine-rich repeat receptor-like protein kinase At1g35710	LOC107797612	50056	44484.7	57149.6	70995.8	27370.8	66084.7
A0A1S3X6M0	Lipoxygenase	LOC107761738	88786	32246.2	0	42463.8	0	0
A0A1S3X2A2	xanthoxin dehydrogenase-like	LOC107760487	209170	173873	224153	306175	130765	348921
A0A1S4CFY2	Conserved oligomeric Golgi complex subunit 2	LOC107818534	23581	8745.1	17882.7	15537	0	0
A0A1S3XFS0	IST1-like protein	LOC107764592	15182	18869.3	17260	20510.6	16954.8	15620.6
A0A1S3X2B6	small EDRK-rich factor 2-like	LOC107760491	128980	92525.1	0	103864	96381.4	99934.9
A0A1S3X2B9	Oxoglutarate dehydrogenase (succinyl-transferring)	LOC107760583	2636300	3.93809e+06	1.87409e+06	3.85611e+06	2.10877e+06	3.78693e+06
A0A1S3X2C4	DEAD-box ATP-dependent RNA helicase 31-like	LOC107760327	141620	6543.5	10372.2	116026	16124.5	0
A0A1S3X2D3	cyclase-associated protein 1-like	LOC107760595	403030	417940	506499	664716	296161	296100
Q8LK72	Non-specific lipid-transfer protein	NtLTP1	0	639583	800854	567559	531751	229510
A0A1S3X2D8	Coatomer subunit gamma	LOC107760598	3497100	2.10928e+06	3.04241e+06	4.40476e+06	4.08727e+06	4.05236e+06
A0A1S3X2F9	Phospholipid-transporting ATPase	LOC107760557	21273	20640.4	16492.8	14060.7	17777	18706.3
A0A1S3X2H1	nudix hydrolase 3-like	LOC107760629	324150	463971	367044	828635	230876	192239
A0A1S4AJ37	hypersensitive-induced response protein 1-like	LOC107798171	165290	334245	256125	137915	150649	99007
A0A1S4A393	glucan endo-1,3-beta-D-glucosidase-like isoform X2	LOC107793272	157630	130596	113102	104959	106625	96016.5
A0A1S3X381	uncharacterized protein LOC107760700 isoform X4	LOC107760700	27024	26661.7	28403.5	26175.2	25347.9	26475.7
A0A1S3X2S4	Ubiquitin carboxyl-terminal hydrolase	LOC107760663	39710	36313.1	36428.5	0	0	43734.3
A0A1S3X2T9	60S ribosomal protein L30-like	LOC107760678	1937500	1.9105e+06	470129	2.41082e+06	454861	421505
A0A1S3X2Y7	Methyltransferase	LOC107760513	0	123390	0	60807	0	92723
A0A1S3X2Z0	triosephosphate isomerase, chloroplastic-like	LOC107760622	11560000	1.53124e+07	1.08574e+07	1.48634e+07	1.25031e+07	1.93488e+07
A0A1S3Y0C2	uncharacterized protein LOC107770620	LOC107770620	363770	306836	425804	126704	260222	421284
Q40568	Phosphate translocator		2766900	2.8615e+06	2769789	2.6078e+06	2.45922e+06	3.02238e+06
A0A1S3ZHI5	uncharacterized protein LOC107786789	LOC107786789	0	217694	149968	138509	209352	152601
A0A1S3X320	2-isopropylmalate synthase	LOC107760648	1284900	1.06663e+06	589691	1.70615e+06	1.0231e+06	964302
A0A1S4DHU2	AT-hook motif nuclear-localized protein	LOC107829884	75750	96727.1	78822.9	95164.4	0	0
A0A1S3X344	uncharacterized protein LOC107760560	LOC107760560	624420	408692	834667	791666	723007	707839
A0A1S3Z6H6	replication factor C subunit 2-like	LOC107783617	31266	25597.6	25072.8	27136.6	0	24175.3
A0A1S3X369	actin-depolymerizing factor 2	LOC107760585	1508100	243491	965166	444939	340369	1.43499e+06
Q5NTA8	Putative 5-epi-aristolochene synthase (Fragment)	HRR8	15606	41294.4	8277.8	0	17828.6	27476.6
A0A1S4AVM3	NADH dehydrogenase [ubiquinone] iron-sulfur protein 8, mitochondrial-like	LOC107801885	265250	734547	170447	45671.3	459138	598493
Q40456	Heterotrimeric GTP-binding protein beta subunit (Fragment)		35384	28750.1	43373.9	23175.5	22512	22965.4
A0A1S3X3T3	nucleosome assembly protein 12 isoform X2	LOC107760768	43074	68390.7	0	57860.5	69439.5	37127.2
A0A1S3X398	copper transport protein ATX1-like isoform X2	LOC107760780	4427100	4.95801e+06	3.7034e+06	3.62893e+06	1646512	4.6247e+06
A0A1S3X3A0	uncharacterized protein LOC107760716	LOC107760716	733260	437515	992701	1.01683e+06	1083237	730335
A0A1S3X3B5	protein TPLATE	LOC107760733	442980	395998	269408	310659	502508	292859
A0A1S3X3C5	Thioredoxin reductase	LOC107760805	62694	94192.5	107583	1785.2	112845	4867.6
A0A1S3X3F7	probable leucine-rich repeat receptor-like protein kinase At5g49770	LOC107760767	54446	64748	60517.7	44171.4	56832.1	37303.1
A0A1S3ZPM8	fatty acid desaturase 4, chloroplastic-like	LOC107788973	23616	0	41223.9	32717.3	30340.9	0
A0A1S3X3I0	10 kDa chaperonin-like	LOC107760854	790530	2.34452e+06	681768	2.07614e+06	2.31289e+06	585763
A0A1S3X3J1	haloacid dehalogenase-like hydrolase domain-containing protein At3g48420	LOC107760931	592590	500137	785500	662515	645417	757641
A0A1S4DMW4	ubiquitin domain-containing protein DSK2b-like	LOC107831485	418940	195983	369187	382703	343465	383792
A0A1S3X3T1	uncharacterized protein LOC107760951 isoform X1	LOC107760951	782080	957981	1.16842e+06	881555	631427	888499
O04361	Prohibitin	LOC107817175	1304300	973702	965519	1.05921e+06	899240	791506
A0A1S3X3Q5	uncharacterized protein LOC107760858	LOC107760858	368370	391389	326682	336653	237711	356972
A0A1S3YBC0	COP9 signalosome complex subunit 5b-like	LOC107774324	88650	69077.8	74112.4	205495	69324.8	153906
A0A1S3X3V9	heterogeneous nuclear ribonucleoprotein 1-like	LOC107760899	2199100	2.20857e+06	1671820	2.18804e+06	2.20108e+06	1.88655e+06
A0A1S3X3W7	calcium-dependent protein kinase 4-like	LOC107760952	40083	142724	98078.3	44600.4	89355.2	33266.3
A0A1S3X3Y8	uncharacterized protein At5g02240-like	LOC107761048	777560	0	984867	1.19302e+06	0	0
A0A1S3X434	50S ribosomal protein L5, chloroplastic	LOC107761040	9170700	6192744	8.10912e+06	8.96359e+06	6.59419e+06	8.45466e+06
A0A1S3ZHY2	uncharacterized protein LOC107786972	LOC107786972	82579	48303.3	38835.3	46556.9	0	0
A0A1S3X451	Ubiquitin receptor RAD23	LOC107761114	76755	54538.3	69409	59903	52162.5	62496.9
A0A1S3X477	uncharacterized protein LOC107760898 isoform X1	LOC107760898	86151	66402.8	70516.9	95926.1	90155.7	74620.5
A0A1S3X4V2	uncharacterized protein LOC107761091 isoform X2	LOC107761091	3421.2	15778.5	0	12641.8	6696.8	0
A0A1S3X4E4	glutathionyl-hydroquinone reductase YqjG-like	LOC107761137	21729	12190.3	18932.9	0	21014.3	16999.8
A0A1S3X4F3	uncharacterized protein LOC107761144 isoform X2	LOC107761144	19263	0	14190.1	8125.1	3094.2	15869.5
A0A1S3X4X1	Inositol hexakisphosphate and diphosphoinositol-pentakisphosphate kinase	LOC107761206	9911.5	10993.1	12894.2	13628.7	14507.6	14018.1
A0A1S3XQS4	uncharacterized protein LOC107767513	LOC107767513	1222400	1.56162e+06	1.84336e+06	1.76286e+06	1.8355e+06	1.6898e+06
A0A1S4A2T2	2-methyl-6-phytyl-1,4-hydroquinone methyltransferase, chloroplastic-like	LOC107793127	1531900	1.79822e+06	1.60753e+06	1.47508e+06	1.58894e+06	1.8515e+06
A0A1S3X4K9	Mitochondrial import inner membrane translocase subunit	LOC107761004	24559	33017.1	32852.1	42092.1	23038.3	33397.9
A0A1S4DHP8	Protein phosphatase	LOC107829842	45112	43198.5	52558.4	59653.2	44538.8	49892.3
A0A1S3X4M4	protein DMR6-LIKE OXYGENASE 2-like	LOC107761017	0	0	10705.8	12044.9	0	0
A0A1S4ARC4	Serine hydroxymethyltransferase	LOC107800464	4864400	5.50138e+06	7.2863e+06	7.45903e+06	4.61902e+06	4.60833e+06
A0A1S3X4P9	Sm protein F	LOC107761142	15625	30181.9	24244.9	23585.1	31495.6	23081.5
A0A1S3X4Q5	GTP-binding protein OBGC, chloroplastic-like isoform X1	LOC107761275	87370	13983.3	86827.7	75802.5	100385	79254.5
A0A1S4AMY4	ERAD-associated E3 ubiquitin-protein ligase component HRD3A-like	LOC107799383	28273	0	24474.3	0	26967.1	44448.7
A0A1S3X4U1	Conserved oligomeric Golgi complex subunit 8	LOC107761300	28112	35128.6	25867.3	35516.3	34599.9	27182.4
A0A1S3X4U8	Methylenetetrahydrofolate reductase	LOC107761305	1882000	1.49731e+06	2.7712e+06	2.48412e+06	1.56223e+06	1.68825e+06
A0A1S3X501	40S ribosomal protein S16-like	LOC107761136	89678	24735.6	0	92516.9	35281.1	0
A0A1S3X544	H(+)-exporting diphosphatase	LOC107761395	6005100	3179585	5.59821e+06	5.95191e+06	5.91531e+06	5.26306e+06
A0A1S3X559	Adenosylhomocysteinase	LOC107761175	19396000	1.33455e+07	14024325	1.47252e+07	1.32508e+07	1.43775e+07
A0A1S3XCP1	uncharacterized protein LOC107763540 isoform X2	LOC107763540	21774	0	15716.5	24063.2	6020.1	0
A0A1S3X593	Phosphoenolpyruvate carboxykinase (ATP)	LOC107761446	2014500	1.0048e+06	1.55406e+06	1.60807e+06	2.12953e+06	1.41884e+06
A0A1S3X5A3	Vacuolar proton pump subunit B	LOC107761463	17294000	1.21965e+07	1.50382e+07	1.6698e+07	1.91439e+07	1.38312e+07
A0A1S3X5D0	NAD(P)H dehydrogenase (quinone)	LOC107761412	764960	1.59922e+06	1.42801e+06	851957	1.60144e+06	1.22663e+06
A0A1S3X5E0	probable nucleoredoxin 1	LOC107761425	513360	737113	476386	507432	767673	333913
A0A1S4CGV4	uncharacterized protein At2g24330-like	LOC107818823	6123300	7.06216e+06	14599.5	0	15017.9	14931.6
A0A1S3X5F8	Eukaryotic translation initiation factor 3 subunit A	LOC107761510	109660	72179	36161.6	77090.4	97029.3	70735.3
A0A1S3X5G0	carboxymethylenebutenolidase homolog	LOC107761401	100220	67805.2	55349.3	105481	220888	200954
A0A1S3X5G4	brefeldin A-inhibited guanine nucleotide-exchange protein 5-like	LOC107761455	853380	363257	438581	687936	737031	526572
A0A1S3X5H7	Xylulose kinase	LOC107761269	10154	15078.9	59015.6	15589.3	11620.1	65477.5
A0A1S3X5I4	GrpE protein homolog	LOC107761529	86187	48633.3	53600.5	78829.8	50117.8	0
A0A1S3ZVK8	cytochrome b5-like	LOC107790893	78868	72827.3	64111.2	72927.7	71684.9	59396.9
A0A1S3X5L8	40S ribosomal protein S17-like	LOC107761505	0	0	0	0	0	151141
A0A1S3X5M1	probable receptor-like protein kinase At5g18500	LOC107761475	33821	60737.6	29903.5	31005.5	0	36806.5
A0A1S3X6E6	Sucrose-phosphate synthase	LOC107761563	445770	245806	215429	156824	476351	191144
A0A1S3X5Q3	chlorophyll(Ide) b reductase NOL, chloroplastic-like	LOC107761536	29646	259222	398299	122650	50951.5	144572
A9ZMJ1	Phenylalanine ammonia-lyase (Fragment)	NtPAL	90180	32052.5	79467.8	169704	228571	171292
A0A1S3X5S0	LOW QUALITY PROTEIN: nuclear-pore anchor-like	LOC107761488	10131	11063.3	7232.3	9222.6	12897.6	5655.2
A0A1S3X5S4	Glycosyltransferase	LOC107761609	19815	0	14576.2	0	23615.1	22163.5
A0A1S3X5U9	RNA-binding protein BRN1-like isoform X2	LOC107761631	39515	46369.9	39893.6	0	0	27601.6
A0A1S3X5W6	Peptidylprolyl isomerase	LOC107761526	237290	207441	257217	261804	266368	239474
A0A1S3X5X7	uncharacterized protein LOC107761659	LOC107761659	115310	107271	25041.4	47080	35646.9	0
A0A1S3X5Y9	60S ribosomal protein L37a	LOC107761416	384860	532060	409348	720810	461156	430640
A0A1S3X5Z4	2-methylene-furan-3-one reductase	LOC107761424	8476400	8.72317e+06	1.34613e+07	12559860	1.22118e+07	1.53364e+07
A0A1S3ZI83	3-oxoacyl-[acyl-carrier-protein] reductase	LOC107787149	162600	131612	147117	175160	103198	138666
A0A1S3X5Z8	uncharacterized protein LOC107761618	LOC107761618	490800	364692	420052	456692	389289	479767
A0A1S3X615	uncharacterized aarF domain-containing protein kinase At5g05200, chloroplastic-like	LOC107761569	98463	98811.4	116226	95988.5	89901.1	120683
A0A1S3YXZ2	Germin-like protein	LOC107780885	115450	1.24626e+06	119460	54626.4	70675.7	456332
F1KPE8	15-cis-phytoene synthase	psy1	143760	422056	203805	182184	195935	28112.5
A0A1S3ZA14	TLD domain-containing protein 1-like	LOC107784438	57379	53124.4	50167.7	50523	40152.5	50234
A0A1S3X674	30S ribosomal protein S1-like	LOC107761621	205470	258950	0	0	193894	0
Q9FV62	Guanine nucleotide-binding protein alpha subunit		23255	23422.2	20793.9	19510.4	19083.2	0
A0A1S3X6A4	Pyruvate kinase	LOC107761670	41333	29550.3	30665.7	50054.1	26794	32400.3
A0A1S3X6B1	transmembrane emp24 domain-containing protein p24delta3-like isoform X1	LOC107761539	129280	113063	101366	67650	0	70328.3
A0A1S3X6B4	uncharacterized protein LOC107761715	LOC107761715	287240	75588.2	324266	311744	86904.6	333868
A0A1S3X6F5	60S acidic ribosomal protein P1-like	LOC107761577	109890	110120	60307.4	73382.2	68340.9	63593
A0A1S3XSN3	signal recognition particle 43 kDa protein, chloroplastic-like	LOC107768293	1264100	2.53483e+06	1072597	1026657	2.85347e+06	2.34299e+06
A0A1S3X6J4	NADH dehydrogenase [ubiquinone] iron-sulfur protein 2-like	LOC107761612	423620	0	492428	381577	455434	412912
A0A1S3X6Y5	uncharacterized membrane protein At1g16860-like isoform X2	LOC107761836	19639	16885.6	17293.4	0	21009.7	18987.2
A0A1S4CMU5	ABC transporter B family member 10-like	LOC107820502	0	42822.5	15998.5	13482.3	28355.8	0
A0A1S3X6L9	Pyridoxal phosphate homeostasis protein	LOC107761802	440140	426182	463670	412465	335323	289121
A0A1S3X6M1	uncharacterized protein At2g37660, chloroplastic-like isoform X1	LOC107761634	1271900	1.13964e+06	643326	846193	546647	789294
A0A1S3XHA6	GDSL esterase/lipase At1g29670-like	LOC107765206	613650	0	739294	601743	0	0
A0A1S3X6T2	thioredoxin-like 2, chloroplastic isoform X1	LOC107761688	10925	14383.4	9249.3	0	9121.6	11380.4
A0A1S3Z5U5	probable dolichyl-diphosphooligosaccharide--protein glycosyltransferase subunit 3B	LOC107783311	186560	115000	119380	126899	127129	107676
A0A1S3ZCD1	universal stress protein A-like protein	LOC107785251	13642	8916.6	10182.1	0	0	7400
A0A1S4B2G1	Xylose isomerase	LOC107803724	574590	1.07135e+06	728307	535258	174272	590264
A0A1S3X778	uncharacterized protein LOC107761820 isoform X3	LOC107761820	381670	422192	338387	333172	582999	313065
A0A1S3X6W9	Pyrophosphate--fructose 6-phosphate 1-phosphotransferase subunit alpha	LOC107761890	776380	592787	566896	695706	620854	420620
Q93YF5	Histone-lysine N-methyltransferase, H3 lysine-9 specific SUVH1	SUVH1	34097	26257.4	27145	31613.6	95259.9	74287.6
A0A1S3X6Y4	Glutaredoxin-dependent peroxiredoxin	LOC107761969	3336400	2.31708e+06	2.24426e+06	1.58882e+06	281070	2.17366e+06
A0A1S3X706	Phosphoglucomutase (alpha-D-glucose-1,6-bisphosphate-dependent)	LOC107761864	3854300	3.58303e+06	3.98673e+06	3.72711e+06	3.52582e+06	5.72945e+06
A0A1S3X711	Phosphoribulokinase	LOC107761746	4046900	4.12797e+06	4.17445e+06	4.12966e+06	4.90273e+06	4.54153e+06
A0A1S3YAQ0	SH3 domain-containing protein 3-like	LOC107774350	306770	154339	94745.6	282382	330690	259128
A0A1S3X756	nitrogen regulatory protein P-II homolog isoform X1	LOC107761932	650620	267884	233654	256664	289648	616896
I2FJN7	Polyadenylate-binding protein	PABP	2489600	2.76724e+06	2.28105e+06	3.04741e+06	2.38055e+06	3.99773e+06
A0A1S3Y0S4	uncharacterized protein LOC107770758	LOC107770758	18489	15004.5	11047.4	15226.8	16246.1	0
A0A1S3X7E9	uncharacterized protein LOC107761891	LOC107761891	73892	99114.1	74535.9	45841.2	16345.9	25821
A0A1S3X7F3	rhodanese-like domain-containing protein 9, chloroplastic	LOC107761899	424760	298802	384471	403834	410275	379899
A0A1S3X7H5	Trehalose 6-phosphate phosphatase	LOC107762039	23247	50910.2	42822	51214.1	71946.3	42225.7
A0A1S3X7K3	Methionine aminopeptidase	LOC107762171	361900	278777	485696	634289	622631	412989
A0A1S3X7K7	ATP synthase subunit d, mitochondrial	LOC107761950	10814	10607.7	7337.7	9181.5	0	11931.1
A0A1S3X7M0	ATP synthase subunit gamma, mitochondrial	LOC107762073	1110100	661766	1.2319e+06	1.2481e+06	1.35363e+06	1.2608e+06
A0A1S4ASU6	uncharacterized protein LOC107800848	LOC107800848	0	26481.5	25098	19599.4	31004.8	41438.3
A0A1S3YA14	putative S-adenosyl-L-methionine-dependent methyltransferase Mb0746c	LOC107774097	21010	24489.4	5.97727e+06	6.09196e+06	6.73925e+06	6.71674e+06
A0A1S4B5J6	Pre-mRNA cleavage factor Im 25 kDa subunit	LOC107804660	179800	0	129387	185572	206049	164457
A0A1S4D4J9	uncharacterized protein C6C3.02c-like	LOC107825864	128110	119996	131611	128117	89195.8	128314
A0A1S3X7T0	Phosphoenolpyruvate carboxylase	LOC107762239	3715300	5.83444e+06	3772133	4681179	4.47109e+06	5.42498e+06
A0A1S3X7U7	chloroplastic group IIB intron splicing facilitator CRS2-B, chloroplastic-like	LOC107762066	32841	25090.6	47242.4	56047.4	27667.8	19212.8
A0A1S4CB00	probable 2,3-bisphosphoglycerate-independent phosphoglycerate mutase	LOC107817040	1915900	1.48108e+06	1.63321e+06	432500	1.35214e+06	352404
A0A1S3X7Y0	non-classical arabinogalactan protein 31-like	LOC107762179	76932	82535.4	46593.4	59085	130031	29794.7
P29449	Thioredoxin H-type 1		944100	759213	986201	448574	792844	969898
A0A1S3X810	Signal peptidase I	LOC107762203	106300	99496.4	0	158012	161326	0
A0A1S4DQ31	fasciclin-like arabinogalactan protein 17	LOC107832235	837670	482803	216541	382898	499859	79271.1
A0A1S3X832	staphylococcal nuclease domain-containing protein 1-like	LOC107762347	376300	177675	405264	210461	403681	398059
A0A1S3Y9V0	uncharacterized protein LOC107774098	LOC107774098	1191500	1.12948e+06	1.31115e+06	1.0631e+06	931590	1.4278e+06
A0A1S3X845	NAD(P)H dehydrogenase (quinone)	LOC107762151	209680	163514	205574	183555	278283	298323
A0A1S3X8A3	Nuclear pore complex protein	LOC107762287	26498	28014.9	26604.2	21318.4	0	19563.4
A0A1S4A6Z0	aspartic proteinase-like protein 2	LOC107794443	11637	10213.9	0	29274.3	24037.1	13239.5
A0A1S3X8C1	protein IN2-1 homolog B-like isoform X2	LOC107762421	574420	761349	438076	422692	462108	718678
A0A1S3X8D5	basic leucine zipper and W2 domain-containing protein 2-like	LOC107762222	690200	883325	845392	669487	818164	610039
A0A1S4A1M1	Polynucleotide adenylyltransferase	LOC107792847	13222	0	12343.3	14894.1	0	13330.2
A0A1S3Y0C9	1-aminocyclopropane-1-carboxylate oxidase homolog	LOC107770851	10377	19820.3	13707.9	20602.8	31532.3	0
A0A1S3X8G7	vesicle-associated protein 1-2-like	LOC107762211	0	16426.8	45767.6	86606.5	106014	84059.9
A0A1S3X8H2	uncharacterized protein LOC107762466	LOC107762466	149450	281615	250323	240560	294292	174444
A0A1S3X8J3	Carboxypeptidase	LOC107762483	56203	61070.7	38316.7	39571.5	53767.9	56667.4
A0A1S3X8M8	protein transport protein Sec24-like At4g32640	LOC107762318	728650	394929	463518	457296	374393	198001
A0A1S4AQT5	exocyst complex component EXO84B-like	LOC107800394	113410	24752.3	97295.9	22349.3	24922.4	99895.1
A0A1S3X8Q5	50S ribosomal protein L10, chloroplastic-like	LOC107762422	2819100	2.90455e+06	2.79648e+06	3.05264e+06	2255210	1.11647e+06
A0A1S3X8Q9	26S proteasome non-ATPase regulatory subunit 8 homolog A-like isoform X2	LOC107762302	0	58265.9	0	49679.4	7393.2	58630.5
A0A1S3X8R4	26S proteasome non-ATPase regulatory subunit 8 homolog A-like	LOC107762432	59199	51784.8	41932.5	53599.5	53152.1	46644.1
A0A1S4CGL9	DNA (Cytosine-5)-methyltransferase CMT2-like	LOC107818784	28183	19972.2	16491.8	19194	18835.5	19013.7
A0A1S3X8S4	stem-specific protein TSJT1-like	LOC107762442	267910	259453	264626	298793	266529	278592
A0A1S3X8T3	DEAD-box ATP-dependent RNA helicase 8-like	LOC107762362	416550	529285	464115	353771	439116	205997
A0A1S3X8T4	carboxyl-terminal-processing peptidase 2, chloroplastic-like	LOC107762452	747150	973074	601922	558549	625991	706767
A0A1S4CQH3	uncharacterized protein LOC107821402	LOC107821402	204600	222617	0	0	0	163594
A0A1S3X8Z4	ras-related protein RABC1	LOC107762524	127050	453026	483058	403118	408761	544599
A0A1S3X901	beta-fructofuranosidase, insoluble isoenzyme 1-like	LOC107762439	351540	242423	328279	312952	96396.3	265487
A0A1S3X902	phototropin-1-like	LOC107762531	104590	116718	121998	64277.7	166922	0
A0A1S4BWM2	heterogeneous nuclear ribonucleoprotein F-like	LOC107812664	16718	13755	12647.6	14472.3	0	11538.5
A0A1S3X946	abscisic acid receptor PYR1-like	LOC107762606	120060	217977	55213.8	321972	174846	232507
A0A1S3X948	macrophage migration inhibitory factor homolog	LOC107762576	21662	63610.6	32306.3	30460.8	69340.9	21955.6
A0A1S3XE22	G-type lectin S-receptor-like serine/threonine-protein kinase At1g34300	LOC107764033	20170	25004.7	11716.6	17692.1	0	23249.6
A0A1S3XA50	microtubule-associated protein 70-2-like	LOC107762809	34686	28673.7	30311.9	30922.6	18183	24323.5
A0A1S3X969	NADH dehydrogenase [ubiquinone] iron-sulfur protein 7, mitochondrial-like	LOC107762627	217210	0	150432	184170	149870	131787
A0A1S4BF64	traB domain-containing protein-like	LOC107807566	19343	24791.1	23781.9	18184.6	22370.9	19448.4
A0A1S3X991	RNA-binding protein Musashi homolog 2-like	LOC107762486	177920	0	0	0	0	137925
A0A1S3X9B6	pentatricopeptide repeat-containing protein At1g79080, chloroplastic-like	LOC107762517	0	0	0	0	0	62032.4
A0A1S3X9C0	Protein-serine/threonine phosphatase	LOC107762525	74058	116917	121523	186074	126372	139352
A0A1S3X9D6	Nucleoside diphosphate kinase	LOC107762688	4704600	98787.3	3.86523e+06	4.342e+06	2.89453e+06	4.23374e+06
H9CCI2	[Acyl-carrier-protein] S-malonyltransferase	MT	1934300	1.47102e+06	2.27094e+06	2.11996e+06	1.21636e+06	1.22309e+06
A0A1S3X9G6	Glucose-1-phosphate adenylyltransferase	LOC107762694	55592	70401.7	36331.4	63266.1	62425.9	73501.3
A0A1S3X9F6	Adenylosuccinate synthetase, chloroplastic	LOC107762705	3167600	3.58209e+06	3.55511e+06	3364687	2.53445e+06	3.25585e+06
Q8LNZ4	Tobacco nucleolin	NNF1	329910	32062.9	63733.1	58950.9	45731.5	75982
A0A1S3X9H1	NEDD8-conjugating enzyme Ubc12-like	LOC107762697	33752	21772.6	29474.9	26973.8	11730.2	34085.8
A0A1S4DFT6	peroxisome biogenesis protein 22-like	LOC107829233	53722	55444.3	48999.2	54043.8	53115.4	46850.9
Q7M275	NADPH--cytochrome P450 reductase		38372	29064.3	38106.5	45075.4	50047.9	131886
A0A1S4DFS7	pentatricopeptide repeat-containing protein At1g71460, chloroplastic-like	LOC107829236	17503	14583.5	13119.6	23984.3	0	22071.7
A0A1S3X9L9	uncharacterized protein LOC107762645	LOC107762645	563720	648946	407174	324992	558378	434080
A0A1S4CPE4	protein RETICULATA, chloroplastic-like	LOC107821219	0	44915.1	124747	157070	0	181688
A0A1S3X9Q3	Prohibitin	LOC107762680	1261500	855455	1.04783e+06	1.28793e+06	552427	1.02516e+06
A0A1S3X9R8	probable alpha,alpha-trehalose-phosphate synthase [UDP-forming] 7	LOC107762801	134960	82036.8	120825	40304.6	309475	47169.4
A0A1S3Z0C6	calmodulin-binding receptor-like cytoplasmic kinase 2	LOC107781676	7732.9	9042.3	8197.8	8537.5	7681.8	8185.7
A0A1S3X9T5	protein STABILIZED1-like	LOC107762664	22366	24072.6	18387.1	19057.9	21770	20040.1
A0A1S3X9T6	protein usf-like	LOC107762794	0	188442	178028	169232	0	154724
A0A1S3X9U6	ATP-dependent zinc metalloprotease FTSH 2, chloroplastic	LOC107762804	15618000	2.03545e+07	1.63846e+07	1.66796e+07	1.72495e+07	21213504
P93375	Actin-104 (Fragment)		348230	371667	399310	338619	95797.7	43776.3
A0A1S3X9U9	uncharacterized protein LOC107762811	LOC107762811	46245	55232.7	1606.8	142123	52552.4	130172
Q50LG5	Peroxidase	NtPOX1	235300	33132.3	25920.8	0	0	0
A0A1S3XDQ4	BSD domain-containing protein 1-like	LOC107764070	27187	0	28687.5	29652	26158.6	30293.5
A0A1S3X9W8	sm-like protein LSM2	LOC107762847	96197	41831.7	93031.2	105389	59116.4	50897.6
A0A1S4C0X2	Elongation factor Tu	LOC107813892	1425200	1.02947e+06	863809	1.26182e+06	1.14859e+06	1.01806e+06
A0A1S4B303	dentin sialophosphoprotein-like	LOC107804014	57992	30503.4	40738.7	12909	36047.1	20192.7
A0A1S3XA08	3-deoxy-8-phosphooctulonate synthase	LOC107762726	408660	535569	1.17318e+06	520321	668673	466264
A0A1S3XA26	Cysteine desulfurase	LOC107762876	539100	561292	380862	487928	433898	274799
A0A1S3XA41	gibberellin-regulated protein 9-like	LOC107762899	145790	143311	157185	148798	138861	0
A0A1S3XA80	uncharacterized protein LOC107762835 isoform X2	LOC107762835	155970	121348	53240.7	159722	186634	920140
A0A1S3XA85	acetylajmalan esterase-like isoform X3	LOC107762939	0	48653.2	0	299848	173837	0
A0A1S3XA86	acetylajmalan esterase-like	LOC107762940	72508	46077.7	31103.4	139236	85347.3	69326.3
A0A1S3XA93	endo-1,31,4-beta-D-glucanase-like	LOC107762850	1191600	1.70814e+06	885400	889049	3.135e+06	1.09946e+06
A0A1S3XAA8	uncharacterized protein LOC107762863	LOC107762863	809590	849684	782427	841853	1.35501e+06	965396
A0A1S3XAB9	Glutamate dehydrogenase	LOC107762966	822100	873763	647814	777456	534274	381270
A0A1S3XAC3	Tubulin alpha chain	LOC107762878	0	171432	0	147149	120845	0
A0A1S3XAD0	Beta-galactosidase	LOC107762980	467260	173391	63378.3	47794.6	233525	117144
A0A1S3Z242	cytochrome c oxidase subunit 6a, mitochondrial-like	LOC107782102	1787500	2.15631e+06	1.82365e+06	2.00049e+06	2.42252e+06	1.64225e+06
A0A1S4BDP9	uncharacterized protein LOC107807165	LOC107807165	285250	316786	355804	81308.4	324211	298467
A0A1S3XAM7	6-phosphofructo-2-kinase/fructose-2, 6-bisphosphatase-like isoform X5	LOC107763053	67815	73084	0	60978	0	0
U3PPV5	Sterol 22-desaturase	SD1	85504	0	89886.5	0	0	99393
A0A1S3XAL0	H/ACA ribonucleoprotein complex subunit	LOC107762965	0	28627.6	0	64543.8	218812	0
A0A1S3XAM4	Transmembrane 9 superfamily member	LOC107762982	9327.6	11058.1	9734.5	0	12162.5	10328.3
A0A1S3XAN0	uncharacterized protein LOC107763083	LOC107763083	188170	0	146460	157326	0	0
A0A1S3XAN1	40S ribosomal protein S14-2	LOC107763058	7158300	6.267e+06	4.01827e+06	7.28621e+06	4.94091e+06	5032470
A0A1S3XAR3	protein DJ-1 homolog B-like	LOC107763100	17254	145259	177674	213737	265256	283193
A0A1S4CJP3	pre-mRNA-splicing factor SYF1-like	LOC107819808	41704	66375.6	88780.6	50048	28439.5	50286
A0A1S3Y7U3	CLP protease regulatory subunit CLPX1, mitochondrial-like	LOC107773337	180000	145343	150604	153036	145225	168770
Q9FSF6	60S ribosomal protein L11-1-like (Fragment)	rbl11-like	2666600	2.25508e+06	2.29783e+06	2663493	2.25211e+06	2287798
A0A1S3XB04	40S ribosomal protein S2-3-like	LOC107763154	6686200	7055876	9.54683e+06	1.01715e+07	7.33809e+06	9.04701e+06
A0A1S3XAY9	RWD domain-containing protein 1-like	LOC107763144	15203	26314	23744.5	29755.4	27358.2	12803.8
A0A1S3XAZ4	trafficking protein particle complex subunit 13-like	LOC107763146	13686	14893.5	13012.5	14697.5	12631.5	15481.3
A0A1S3XB16	Spermidine synthase	LOC107763093	1215900	692862	809305	1.40761e+06	1.23907e+06	1.15806e+06
A0A1S3XB34	probable proteasome inhibitor	LOC107763060	11040	13059.6	11344.6	7470.4	9608.4	0
A0A1S3XB37	Carboxypeptidase	LOC107763201	334210	638881	614082	472141	690599	315100
F2VJ74	Aspartic protease 1		1007000	1.17556e+06	963538	1.1317e+06	1.1318e+06	1.10685e+06
A0A1S4CW38	primase homolog protein-like isoform X3	LOC107823224	37347	37219.1	36412.3	39728.2	40035.5	40899.7
A0A1S3ZMX0	flowering time control protein FPA-like isoform X2	LOC107788536	0	0	30808.2	0	0	0
A0A1S3XB94	TOM1-like protein 2	LOC107763152	53503	0	11501.3	62907.8	0	0
A0A1S3XB98	pheophytinase, chloroplastic-like	LOC107763257	194940	148317	34043.9	59344	301815	54531.8
A0A1S3XBA9	23 kDa subunit of oxygen evolving system of photosystem II	LOC107763119	1028700	1.21347e+06	1.85791e+06	1.96445e+06	2.10521e+06	2.03708e+06
A0A1S3XBB8	1-acyl-sn-glycerol-3-phosphate acyltransferase 1, chloroplastic-like	LOC107763278	108330	84407	94839.6	80503.7	98802.2	103518
A0A1S3XBC3	pentatricopeptide repeat-containing protein At3g49240-like	LOC107763128	264210	548357	468401	95801.2	459356	202458
A0A1S4D1I1	Beta-hexosaminidase	LOC107824971	140250	82318.6	79417.3	19780.7	79297	64304.1
A0A1S3XBE6	Photosystem I reaction center subunit II, chloroplastic	LOC107763149	14927000	4.74581e+07	4.4502e+07	44287123	5.2174e+07	4.5944e+07
A0A1S3XBH0	Glutamyl-tRNA reductase	LOC107763283	19031	0	27379.5	27330.1	7582.8	20801
A0A1S3XBL8	protein plastid transcriptionally active 16, chloroplastic-like isoform X1	LOC107763187	15418000	1.97815e+07	1.81677e+07	1.70369e+07	17438716	1.48199e+07
A0A1S3XBR3	T-complex protein 1 subunit epsilon	LOC107763390	968680	582763	663320	839047	740873	584447
P41098	60S ribosomal protein L34	RPL34	2064300	1.72145e+06	1.64402e+06	1.05655e+06	1.08948e+06	1542931
A0A1S3XBU0	gamma carbonic anhydrase 1, mitochondrial-like	LOC107763258	0	0	0	0	0	134585
A0A1S3XBV6	glycine-rich RNA-binding protein 2, mitochondrial-like	LOC107763441	391190	652581	314653	507892	455056	174156
A0A1S3XBV7	60S ribosomal protein L27	LOC107763424	999260	832874	809032	947917	1.1971e+06	826753
A0A1S3YUX6	phosphoethanolamine N-methyltransferase 1-like	LOC107780089	108890	0	3694	0	87202.8	0
A0A1S3XBX7	Diphosphomevalonate decarboxylase	LOC107763449	102640	104188	91852.6	98399.6	116660	98015
O80362	50S ribosomal protein L10, chloroplastic	RPL10	3506700	3.45996e+06	2.99581e+06	3.38742e+06	3.79737e+06	2.30815e+06
A0A1S4CF02	Pyruvate dehydrogenase E1 component subunit beta	LOC107818291	1626400	1.45196e+06	1.59116e+06	1.80873e+06	1.67094e+06	1.47657e+06
A0A1S3XC04	GDSL esterase/lipase At5g33370-like	LOC107763465	357280	91719.7	35792.7	205577	252951	33834.8
A0A1S4A1I0	Methyltransferase	LOC107792773	26210	34409	25073.8	0	2105.3	31967.9
A0A1S3XC34	uncharacterized protein LOC107763521 isoform X2	LOC107763521	72195	48379.8	66866.7	23331.2	0	0
A0A1S3XC40	protein QUIRKY-like	LOC107763417	29014	71191.4	101720	182910	13112	29885.4
A0A1S3XC51	tetrapyrrole-binding protein, chloroplastic-like	LOC107763426	140030	128972	150453	257565	363579	117498
A0A1S3XC54	S-adenosylmethionine synthase	LOC107763541	29674	0	25828.9	21714.6	29882.2	23146.7
A0A1S4C3R5	Electron transfer flavoprotein subunit alpha	LOC107814851	0	127213	110141	0	98810.2	0
A0A1S3XC79	Glycosyltransferase	LOC107763568	239770	250278	189845	138949	17986.9	303908
A0A1S3Y0L6	pentatricopeptide repeat-containing protein At3g06430, chloroplastic-like	LOC107770930	84642	60068.4	3833.1	118596	160557	69122.8
A0A1S3XC82	Annexin	LOC107763461	10898	6781.3	6824.2	9694.6	0	4961.4
A0A1S3ZZM0	ras-related protein RABD2a-like	LOC107792089	50002	57448.9	47616.4	44269.7	66788.2	0
A0A1S3XCC1	histidinol dehydrogenase, chloroplastic-like	LOC107763421	97775	121306	59789.9	103382	50732.5	118294
A0A1S3XCC7	LL-diaminopimelate aminotransferase, chloroplastic-like	LOC107763425	235790	0	184680	239905	242092	116646
A0A1S3XCF3	nucleolar protein 56-like	LOC107763606	0	26354.8	22767	16890.5	17262.1	0
A0A1S3XCF5	probable N-succinyldiaminopimelate aminotransferase DapC	LOC107763647	58431	17046.9	43067.6	66539.2	53958.3	59425.7
A0A1S3XCH4	splicing factor 3B subunit 4-like	LOC107763648	167560	146840	180687	133686	158963	132594
A0A1S3XCI2	Rab escort protein 1	LOC107763638	601690	326494	596635	651950	763980	688905
A0A1S3XCJ5	D-glycerate 3-kinase, chloroplastic-like	LOC107763687	8648600	9.38835e+06	9240245	9.6826e+06	1.00151e+07	8583943
A0A1S3XCJ6	30S ribosomal protein S1-like	LOC107763574	101520	93548.4	59838.4	147456	172816	82137.8
A0A1S3XCK8	Malate dehydrogenase	LOC107763505	637270	1.28868e+06	471554	482103	428680	693119
A0A1S3XCN0	aspartate aminotransferase-like isoform X2	LOC107763688	59927	31703.7	58309	36742.8	25025.7	59126
A0A1S3XCM3	universal stress protein MT2085-like	LOC107763703	570840	169212	452369	78114.2	533448	385539
A0A1S3XES7	60S ribosomal protein L12-like	LOC107764287	3986100	3.31113e+06	3.78234e+06	4.04612e+06	4.24311e+06	4.11651e+06
A0A1S3XCR2	probable LRR receptor-like serine/threonine-protein kinase At1g14390	LOC107763733	12472	11345	12515.1	12876.2	11220.4	0
A0A1S3XCV6	5-methyltetrahydropteroyltriglutamate--homocysteine S-methyltransferase	LOC107763602	765620	671391	671579	833253	751676	656025
A0A1S3XCV7	calmodulin-like	LOC107763754	621580	677937	453087	503193	0	389731
A0A1S3XCX6	copper-transporting ATPase PAA1, chloroplastic	LOC107763623	427290	168730	128214	237468	296780	101679
A0A1S3XCY5	Beta-ketoacyl-[acyl-carrier-protein] synthase I	LOC107763810	118240	138734	192665	184886	157094	158031
A0A1S3XCZ9	protein CURVATURE THYLAKOID 1B, chloroplastic-like	LOC107763650	1230000	2.37385e+06	814592	3.12983e+06	1.20902e+06	836352
A0A1S3XD03	Tubulin-specific chaperone A	LOC107763800	0	313622	362374	340748	318305	0
A0A1S3XD08	coatomer subunit beta-1-like	LOC107763805	116780	168804	140001	108317	199662	128956
A0A1S3XD32	guanine nucleotide-binding protein subunit beta-like protein	LOC107763849	174930	95616.9	172226	122077	46014.7	188821
A0A1S3ZDX3	cell number regulator 6-like	LOC107785656	37580	28439.1	36748.9	41587.4	36581.5	33546.1
A0A1S3XD60	proton pump-interactor 1-like	LOC107763720	491240	656414	389303	605613	532714	409328
A0A1S4CF60	probable receptor-like protein kinase At1g80640	LOC107818307	0	28563.7	30531.3	32133.7	28821.4	28017.4
A0A1S3Z8W4	Uncharacterized protein ycf23	LOC107784224	201820	139488	190623	97802.7	70580.5	175815
A0A1S3ZXE6	Protein-serine/threonine phosphatase	LOC107791500	89899	18317.3	18595.3	143761	99737.9	142957
A0A1S3XDA5	protein MODIFIER OF SNC1 11-like	LOC107763766	22346	973650	818776	17574.4	18220.8	757763
A0A1S3XDC3	uncharacterized protein LOC107763852	LOC107763852	1663200	1.53323e+06	718754	925292	745804	1.70905e+06
A0A1S3XDC8	Zeaxanthin epoxidase, chloroplastic	LOC107763949	2166300	2563945	2.54478e+06	9.16057e+06	2.39982e+06	1916747
A0A1S3Z880	glutathione S-transferase T1-like	LOC107784129	325770	319990	234463	352757	269075	296011
A0A1S3XDD7	Mitochondrial pyruvate carrier	LOC107763801	269670	214479	266052	298926	187277	256141
A0A1S3XDE1	Aspartate aminotransferase	LOC107763872	3269400	3034211	3.19373e+06	3.43103e+06	2.16026e+06	3.86468e+06
A0A1S3XDG3	60S ribosomal protein L23a-like	LOC107763824	1424400	1.13388e+06	4240655	854783	695932	778886
A0A1S3XDG5	glutamyl-tRNA(Gln) amidotransferase subunit A, chloroplastic/mitochondrial-like	LOC107763882	2027200	1.5701e+06	1871561	1.87589e+06	1.78974e+06	824972
A0A1S3XDI1	N-alpha-acetyltransferase 15, NatA auxiliary subunit-like isoform X1	LOC107763992	181860	207420	59142.9	186135	229535	146817
A0A1S4B8F8	uncharacterized protein LOC107805582 isoform X3	LOC107805582	23843	26316	24421.8	19555.4	26521	11005.9
A0A1S3XDL9	Adenine phosphoribosyltransferase	LOC107764026	67957	37336.4	40349.5	62334.5	47957.3	37442.4
A0A1S3Z918	calumenin-B-like	LOC107784272	65241	48087.6	38514.8	26846.9	73722.6	9795.2
A0A1S3YIY3	trihelix transcription factor GT-2-like	LOC107776802	29902	112539	31633.1	118320	114546	26313.1
A0A1S3XDN8	protein TIC 100	LOC107763893	82683	112623	93616.5	56411.9	78416.3	46867.5
A0A1S3XUD3	pinin-like	LOC107768853	0	0	35471.2	23095.7	46605.3	40254.9
A0A1S3XDP7	Secretory carrier-associated membrane protein	LOC107763960	72304	0	0	48065.9	0	40020.4
A0A1S3ZU40	probable serine/threonine-protein kinase At1g01540	LOC107790514	14853	0	14834	0	0	0
A0A1S4C3F5	pollen-specific protein C13-like	LOC107814761	34846	27498.5	28557.1	4343.2	0	0
A0A1S3XDT6	protein QUIRKY-like	LOC107764108	331970	272398	243278	157121	385115	292605
A0A1S3XDU6	pentatricopeptide repeat-containing protein At5g46580, chloroplastic-like	LOC107763956	156190	124793	103550	0	678111	341820
A0A1S4B9P0	uncharacterized oxidoreductase At1g06690, chloroplastic-like	LOC107806016	446360	628439	801471	932888	697101	900886
A0A1S3XDX1	transmembrane protein DDB_G0273707/DDB_G0273361-like	LOC107763980	157500	698434	116034	138662	306436	127794
A0A1S4AKB5	Histone H4	LOC107798555	23113000	1.54339e+07	16658561	1.57131e+07	2.44397e+07	1.57567e+07
A0A1S3XI19	mitochondrial import receptor subunit TOM20	LOC107765437	186740	195208	186994	249262	139193	284111
A0A1S3XE16	60S ribosomal protein L5-like	LOC107764090	3834300	1.01262e+06	2.83792e+06	1.51869e+06	3447148	3.1416e+06
A0A1S3XE25	eukaryotic initiation factor 4A-14	LOC107764101	7177200	6.47846e+06	5740431	5.33303e+06	6.19088e+06	5.40396e+06
A0A1S3XEB8	uncharacterized protein LOC107764097 isoform X1	LOC107764097	229150	223727	118076	189012	139159	180504
A0A1S3XHX3	protein NUCLEAR FUSION DEFECTIVE 4-like	LOC107765436	331250	410106	175127	303318	333557	333935
A0A1S3XE60	Aldehyde dehydrogenase	LOC107764230	61990	24570.1	23777.9	59021.5	59609.5	65893.4
A0A1S3XE72	60S ribosomal protein L22-3	LOC107764146	51166	74906.4	67362	58651.9	120146	28505.1
A0A1S4CLS5	spartin-like	LOC107820244	303920	419218	387140	367735	270394	419160
A0A1S4AKK7	Phosphoribosylformylglycinamidine cyclo-ligase	LOC107798458	446050	164132	507591	437752	152576	427278
A0A1S4ADP2	UDP-glucose 6-dehydrogenase	LOC107796541	337200	403130	323740	352102	550030	278272
A0A1S3XEF3	Alpha-1,4 glucan phosphorylase	LOC107764127	83331	151197	198720	148214	138368	133788
A0A1S3Y096	Homogentisate 1,2-dioxygenase	LOC107770720	143810	284045	137201	65919.8	113064	75911.2
A0A1S3XEK0	GMP synthase (glutamine-hydrolyzing)	LOC107764380	567300	266648	521793	704501	463289	551102
A0A1S3XEK9	23 kDa subunit of oxygen evolving system of photosystem II	LOC107764259	332440	308920	338124	339909	265302	357503
A0A1S3XEN1	Ribosomal protein L19	LOC107764242	847340	726880	777989	553553	736825	696558
A0A1S3XEN9	probable acyl-CoA dehydrogenase IBR3	LOC107764289	576290	691867	675915	501176	567472	586327
A0A1S3XEQ3	thylakoid lumenal 15 kDa protein 1, chloroplastic-like	LOC107764296	2663800	2.9278e+06	2.57055e+06	1.81272e+06	2.92056e+06	2.64502e+06
A0A1S3XEQ9	uncharacterized protein At4g37920, chloroplastic-like	LOC107764216	0	0	21118.4	19444.9	10596	0
A0A1S3XER7	serine/threonine protein phosphatase 2A 59 kDa regulatory subunit B gamma isoform-like	LOC107764277	37079	31686.9	31307.6	35052.5	37731.7	34179.8
A0A1S3XER8	S-formylglutathione hydrolase	LOC107764314	1777400	1.51239e+06	1.34401e+06	1.44375e+06	2.04971e+06	2.09248e+06
A0A1S3XET2	acetylajmalan esterase-like	LOC107764291	837320	936594	765050	913927	1.12191e+06	581195
P27492	Chlorophyll a-b binding protein 16, chloroplastic	CAB16	223300000	2.09515e+08	212689795	2.32564e+08	2.65887e+08	271481092
A0A1S3XEV6	inositol 1,3,4-trisphosphate 5/6-kinase 4-like	LOC107764478	30835	27811.7	26265.5	32031.3	28225.1	27959.9
Q9FES7	Mg-protoporphyrin IX chelatase	Su-s	13816000	1.04596e+07	1.55204e+07	1.36307e+07	1.54858e+07	1.19544e+07
A0A1S3XEW2	phototropin-2-like	LOC107764484	1408300	1.71527e+06	1.74035e+06	1.15545e+06	1.61142e+06	1.4142e+06
A0A1S3XEX8	uncharacterized protein LOC107764385	LOC107764385	109630	228493	390900	476114	496580	145412
A0A1S3XXW4	60S ribosomal protein L18a-like protein	LOC107770045	224600	3462	189340	184702	150546	187903
A0A1S3XF03	Beta-ketoacyl-[acyl-carrier-protein] synthase I	LOC107764303	220360	98429.1	217693	233230	75629.7	26013.4
A0A1S3XF06	WW domain-containing protein C11B10.08-like	LOC107764510	171460	155952	158681	142378	172862	71300.4
A0A1S3XF28	F-box/FBD/LRR-repeat protein At1g13570-like	LOC107764332	0	242664	0	239250	318775	257424
A0A1S3XF52	L-arabinokinase-like	LOC107764455	273400	77625.3	112142	173594	71895.9	196773
A0A1S3XF65	Lactoylglutathione lyase	LOC107764558	857150	1.05805e+06	615194	627072	895295	856348
A0A1S3XF86	L-gulonolactone oxidase	LOC107764580	40577	15018.1	7116.8	0	0	0
A0A1S3XFB9	protein NEOXANTHIN-DEFICIENT 1-like	LOC107764508	14671	10667.4	11889.4	13373.8	11578.8	14363.2
A0A1S3XFC9	ATPase ASNA1 homolog	LOC107764515	104870	0	0	93290.8	153092	91529.6
A0A1S3XFD7	uncharacterized protein LOC107764509	LOC107764509	153320	199167	68683.2	226862	112975	350502
A0A1S3XFF8	3-oxoacyl-[acyl-carrier-protein] reductase	LOC107764635	1286500	1.38063e+06	1.3718e+06	1.12033e+06	1.28551e+06	1.13992e+06
A0A1S3XFG9	ferredoxin--nitrite reductase, chloroplastic-like	LOC107764462	219700	44685.7	145065	241676	145088	168626
A0A1S4BQ15	UPF0678 fatty acid-binding protein-like protein At1g79260	LOC107810693	28777	0	30056.2	37912	0	34841.2
A0A1S3XFL7	S-adenosylmethionine synthase	LOC107764500	16081	14426.4	8209.6	11112.2	0	7612.6
A0A1S4BUD6	FAD synthase-like	LOC107811999	30594	31579	0	35989.3	40798.1	30876.3
A0A1S3XFP2	Tetratricopeptide repeat protein 38	LOC107764562	31953	52151.4	35552.1	40081.4	46216.6	37527.6
A0A1S3XFQ2	Exocyst subunit Exo70 family protein	LOC107764721	125360	298970	269792	245249	285714	294286
A0A1S3XFR3	macrophage migration inhibitory factor homolog	LOC107764538	614630	458284	585486	690240	554525	578464
A0A1S3XFT6	Glyceraldehyde-3-phosphate dehydrogenase	LOC107764636	92501	94618.8	1.85488e+06	1.89063e+06	1.85488e+06	1.85249e+06
A0A1S3XG50	uncharacterized protein LOC107764684 isoform X3	LOC107764684	32094	41600.2	74982.7	93204.8	76151.5	90516.6
A0A1S4BI54	Non-specific serine/threonine protein kinase	LOC107808522	136120	244276	353398	209693	128735	174388
A0A1S3XFX2	Sulfate adenylyltransferase	LOC107764687	1089200	989245	742074	831287	1.12975e+06	821710
A0A1S3XFX9	plasma membrane-associated cation-binding protein 1-like	LOC107764656	1103500	1.40085e+06	753173	819636	1.04622e+06	901029
A0A1S3XFY3	uncharacterized protein At5g01610-like	LOC107764662	55540	0	0	23014.8	0	125051
A0A1S3ZSC8	protease HtpX homolog	LOC107789950	25545	25294.9	26599.1	25191.4	19040.7	36455.9
A0A1S3XFZ4	Dihydrolipoamide acetyltransferase component of pyruvate dehydrogenase complex	LOC107764742	1334700	1.72522e+06	1.28093e+06	1.13907e+06	1.19779e+06	2.1375e+06
A0A1S3XG29	uncharacterized protein At4g28440-like	LOC107764713	31962	22829.4	27315.8	35364.8	31887.8	22223.2
A0A1S3XG42	uncharacterized protein LOC107764676	LOC107764676	0	32871.5	0	37836.2	39238.5	41284.5
A0A1S4AXF5	zinc finger CCCH domain-containing protein ZFN-like isoform X4	LOC107802347	72159	0	0	55140.3	83975.8	0
A0A1S3XQ86	beta-xylosidase/alpha-L-arabinofuranosidase 2-like	LOC107767521	8884.2	0	12767.9	14913.6	18724.2	10704.5
A0A1S3XGB4	60S ribosomal protein L13	LOC107764897	3786500	3.50343e+06	2.75584e+06	3.37492e+06	3.7429e+06	3.12689e+06
A0A1S3XGD0	short-chain dehydrogenase TIC 32, chloroplastic-like	LOC107764923	746670	689940	760471	795383	428027	1059890
A0A1S3ZGQ9	WD repeat-containing protein 55	LOC107786560	21510	15356.4	15066.5	17014.4	19310.2	16843.8
A0A1S4CG87	uncharacterized protein LOC107818673 isoform X2	LOC107818673	287980	976279	688722	750039	841834	195059
A0A1S3XGD9	uncharacterized protein LOC107764905	LOC107764905	46275	47875	47260.6	75241.4	102913	49034
A0A1S3XGG6	ER membrane protein complex subunit 8/9 homolog	LOC107764945	0	0	159641	0	0	0
A0A1S3XGG7	ribose-phosphate pyrophosphokinase 4	LOC107764845	254910	247691	304646	345857	253250	257612
A0A1S3XGH0	uncharacterized protein LOC107764953	LOC107764953	686680	702414	517163	532576	538540	470698
A0A1S4CTR1	light-induced protein, chloroplastic	LOC107822374	702220	798038	756842	788718	537496	803328
A0A1S3XGK4	heat shock cognate protein 80-like	LOC107764955	146090	63055.5	0	33039.8	34660.7	54060.6
A0A1S3XGL8	Inositol-tetrakisphosphate 1-kinase	LOC107764911	27011	0	0	21240.6	14579.9	0
A0A1S3XGM0	triosephosphate isomerase, chloroplastic-like	LOC107764979	414580	427010	440027	394036	29707.9	472944
A0A1S4DD70	Pectate lyase	LOC107828480	0	30710.8	11652.9	8190.9	5478.1	0
A0A1S3XGP8	uncharacterized protein LOC107765033	LOC107765033	336650	399527	402060	324603	503242	323152
A0A1S3XGQ6	1,4-alpha-glucan-branching enzyme 1, chloroplastic/amyloplastic-like	LOC107764808	283920	155376	16308.8	163254	0	148940
A0A1S3XGZ1	TPR repeat-containing thioredoxin TDX-like isoform X2	LOC107765036	95272	120384	78872.4	93205.9	121843	77094.6
A0A1S3XGU4	hsp70-Hsp90 organizing protein 2-like	LOC107764856	465290	475325	105865	294145	454803	178259
A0A1S3XGW1	Glucose-6-phosphate 1-epimerase	LOC107765053	384270	297566	338620	289016	409724	444211
A0A1S4AWJ2	vesicle-associated membrane protein 714-like	LOC107802062	17303	16742.1	17503.6	16887.4	9754.4	16003.3
A0A1S3XH29	uncharacterized protein LOC107765168	LOC107765168	0	44884.7	415948	76478.2	155534	8194.8
A0A1S3XH45	costars family protein-like	LOC107765076	830550	66000.6	461598	765324	838829	13846.7
A0A1S3XH54	protein RETICULATA-RELATED 4, chloroplastic-like	LOC107765191	1198600	1.21766e+06	1.03772e+06	1.34751e+06	1.41189e+06	1.09674e+06
A0A1S3XH91	SUMO-activating enzyme subunit	LOC107765192	79768	50488.1	15199.9	56706.7	151131	79429.3
A0A1S4B398	survival of motor neuron-related-splicing factor 30-like isoform X1	LOC107804027	64097	57693	124282	7766.9	64864	44987.3
A0A1S4C6S2	26S protease regulatory subunit S10B homolog B-like	LOC107815805	500660	797965	700357	622444	421215	620192
A0A1S3XHC6	cinnamoyl-CoA reductase 2-like	LOC107765220	106380	104470	57968.4	102251	99171.4	68218.1
A0A1S3XHC9	Isoleucine--tRNA ligase	LOC107765258	1149200	1.00976e+06	921245	735389	880468	564938
A0A1S3XHF5	S-adenosylmethionine synthase	LOC107765217	115330	102083	109140	94877.7	106234	86068.4
A0A1S3XHG4	phosphoglucomutase, cytoplasmic-like	LOC107765291	45970	40844	52068.1	52401.7	22229.9	41452.7
A0A1S3XHK0	Chlorophyll a-b binding protein, chloroplastic	LOC107765079	0	0	0	0	18617.6	0
A0A1S3YND6	putative E3 ubiquitin-protein ligase XBAT35 isoform X2	LOC107777805	0	78727.1	0	0	0	0
A0A1S3XHL0	40S ribosomal protein S20-2	LOC107765328	525700	383963	331695	379765	171062	326049
A0A1S4BEK5	uncharacterized protein LOC107807417	LOC107807417	0	186986	0	191961	112578	189463
A0A1S3ZE64	ATP-dependent Clp protease proteolytic subunit	LOC107785710	2909200	3.22054e+06	3.12924e+06	3.17314e+06	3.49199e+06	3.39199e+06
A0A1S3YQV4	HMG-Y-related protein B-like	LOC107778578	23970	336602	22473.9	195196	304257	105101
A0A1S4AML2	2-oxoisovalerate dehydrogenase subunit beta 1, mitochondrial-like	LOC107799279	111570	0	0	26259.2	36474.9	46284.6
A0A1S3XHU0	oligopeptide transporter 3	LOC107765365	142560	123578	163078	96658.1	143723	109214
A0A1S3XHU6	UPF0051 protein ABCI8, chloroplastic-like	LOC107765372	97126	93333.7	384067	126162	106012	123061
A0A1S3XHV4	Expansin	LOC107765424	85586	83426.7	65678	27520.5	131567	54998.5
A0A1S3XHV7	ABC transporter B family member 25-like	LOC107765170	66633	85999	73277.5	18742.5	27322.6	6230.5
A0A1S3XHX8	glucan endo-1,3-beta-glucosidase, acidic-like	LOC107765187	11910	20493.8	10147.8	12158.5	16072.9	12585.9
Q02585	Cytochrome b6-f complex iron-sulfur subunit 2, chloroplastic	petC2	30690000	3.39482e+07	32024264	3.31247e+07	3.06195e+07	3.13065e+07
A0A1S3ZN23	Vacuolar proton pump subunit B	LOC107788603	6337.4	0	36988.5	32346.7	0	33582.6
A0A1S4BDY5	T-complex protein 1 subunit delta	LOC107807204	777210	447172	1291645	825933	1.41601e+06	710660
A0A1S3XI79	60S ribosomal protein L5-like	LOC107765428	131860	105878	116984	113006	102463	44616.8
A0A1S4C251	mitochondrial amidoxime reducing component 2-like isoform X2	LOC107814341	116900	98136.9	104783	107518	98962.7	95393.9
A0A1S3XIA7	Ribosomal protein L15	LOC107765511	3073900	552516	1.44155e+06	2.51668e+06	1.70385e+06	1349166
A0A1S3XIB9	rhodanese-like domain-containing protein 14, chloroplastic	LOC107765512	4036400	3.49662e+06	2.84712e+06	3.65053e+06	4.52453e+06	3.81602e+06
A0A1S4CJ80	phosphoinositide phosphatase SAC2-like	LOC107819653	22191	21846.9	17185.2	17698.3	17868.7	16268.7
A0A1S3XIG8	Leucine carboxyl methyltransferase 1 homolog	LOC107765344	206690	191982	187207	170318	187323	175295
A0A1S3XIH4	NADH-cytochrome b5 reductase	LOC107765620	54658	221517	245795	387269	423153	134253
A0A1S3YPT1	RNA-binding protein 2-like isoform X1	LOC107778330	280050	277541	192069	212262	229844	205267
A0A1S3XII8	Spermidine synthase	LOC107765582	303130	120939	238466	239956	129171	267345
A0A1S3ZXQ6	protein KAKU4-like	LOC107791612	18562	26524.5	0	38658.3	22700	0
A0A1S3XIK8	multiprotein-bridging factor 1b	LOC107765599	25379	19898.9	16795	7227.4	27148.3	103139
A0A1S4AR72	Uroporphyrinogen decarboxylase	LOC107800512	716480	726650	771843	912289	625051	720182
A0A1S3XIQ8	epidermis-specific secreted glycoprotein EP1-like	LOC107765691	48422	256038	273269	36416.2	12263.4	299064
A0A1S3XIR8	uncharacterized protein LOC107765704	LOC107765704	0	116341	0	123142	0	0
A0A1S4DDK4	UDP-glucuronate decarboxylase	LOC107828673	36665	19566.8	25438.7	31666.9	10790.4	19619.8
A0A1S3XYD3	zinc finger CCCH domain-containing protein 14-like	LOC107769987	41450	38865.6	31079.1	41895.5	35532.2	34678.6
A0A1S4BDZ0	pentatricopeptide repeat-containing protein At3g02490, mitochondrial-like	LOC107807208	0	0	0	0	0	14869.7
A0A1S3XIV5	uncharacterized protein LOC107765690	LOC107765690	92203	107397	44752.7	89233.6	64743.5	99439.5
A0A1S3XIW2	uncharacterized protein At4g14100-like	LOC107765693	68278	112623	64286.1	63035.8	280531	67023.7
A0A1S3YQ25	Phosphatidate cytidylyltransferase	LOC107778349	22497	40503.6	31866.6	35789.7	0	30313.4
A0A1S3XIW5	phospholipase A-2-activating protein-like	LOC107765477	718260	316597	659974	657683	532278	570191
A0A1S3XIW7	CSC1-like protein ERD4	LOC107765699	732670	1.1698e+06	599476	778869	915880	679626
A0A1S3XIX1	Glutathione transferase	LOC107765621	32178	21030	20097.4	24302.7	0	31302.1
A0A1S3XIX6	2,3-dimethylmalate lyase-like	LOC107765651	0	38587	25485.2	38420.8	42035.5	0
A0A1S3XIY1	probable Xaa-Pro aminopeptidase P	LOC107765714	961530	769791	746077	978989	973263	1.04689e+06
A0A1S3XIZ8	Ribosomal protein	LOC107765506	0	130292	109473	0	132817	118515
A0A1S3XJ11	GrpE protein homolog	LOC107765781	26001	29077.9	25834.9	36950.6	29929.2	34116.8
A0A1S3XJ19	xanthoxin dehydrogenase-like	LOC107765743	95363	96072.5	221403	262940	102760	103309
A0A1S3XJ20	miraculin-like	LOC107765742	270410	6616.4	129336	93086.1	7183.2	64015.4
A0A1S3XJ23	Structural maintenance of chromosomes protein	LOC107765531	97454	84998.8	85885.6	42590.7	40658.2	49456.5
A0A1S3XJ24	NADPH--cytochrome P450 reductase-like	LOC107765750	78900	86990.8	81025.5	35012.6	38216.8	38301.8
A0A1S3XJ34	Ribulose bisphosphate carboxylase small subunit, chloroplastic	LOC107765795	11698000	1.13628e+07	1.59388e+07	1.47979e+07	4.93128e+06	1.6449e+07
A0A1S4BUC0	NADH dehydrogenase [ubiquinone] 1 beta subcomplex subunit 10-A-like	LOC107811984	213580	589519	666929	628515	630498	577933
A0A1S4C587	21 kDa protein-like	LOC107815292	10241	0	0	0	0	0
A0A1S3XJ89	miraculin-like	LOC107765744	389660	415039	397925	382038	316424	343767
A0A1S3XJ91	ribulose bisphosphate carboxylase/oxygenase activase 1, chloroplastic-like	LOC107765793	938720	474466	513919	790264	924721	409660
A0A1S3XJE9	peptidyl-prolyl cis-trans isomerase CYP37, chloroplastic-like isoform X2	LOC107765860	1338600	962747	760198	1.39962e+06	1624609	1.18814e+06
A0A1S3XJA2	protein GAST1-like	LOC107765809	121590	75039.4	95180.2	127697	108707	115308
A0A1S3XJA5	myosin-17-like	LOC107765758	552690	569577	478964	555795	571807	627535
A0A1S3XJC8	40S ribosomal protein S3a	LOC107765835	690140	629706	670851	817456	568023	0
A0A1S3XJD3	Photosystem I reaction center subunit III	LOC107765837	0	7.21183e+06	8.03856e+06	7097529	7196925	6.74539e+06
A0A1S4D5R8	LOW QUALITY PROTEIN: selenium-binding protein 1-like	LOC107826302	40156	62629.2	43303.2	50856.8	86838.1	60475.2
A0A1S3XJE3	la-related protein 1C-like isoform X2	LOC107765844	49347	10079.5	14820.9	17938.9	5902.2	16715.5
E5L8B6	Plastid thioredoxin F	LOC107803208	1914100	2.72974e+06	1.41406e+06	1500979	1208566	985392
A0A1S3XJK2	BRCT domain-containing protein At4g02110-like isoform X2	LOC107765913	35413	120447	118349	134321	43592.8	144638
A0A1S3XJF1	lysosomal Pro-X carboxypeptidase-like	LOC107765654	48205	56783.8	55086.5	93635.9	78777.5	110485
A0A1S3XJF2	glycerate dehydrogenase	LOC107765918	17818000	1.88682e+07	2.01884e+07	2.05618e+07	1.77931e+07	1.84077e+07
A0A1S3XJF5	Phosphoribosylformylglycinamidine synthase	LOC107765791	86664	104287	88022.5	93495.6	104354	95155
A0A1S3XJJ2	putative PAP-specific phosphatase, mitochondrial isoform X1	LOC107765899	345150	1088734	167182	197008	320977	330606
A0A1S3XJK0	40S ribosomal protein S27	LOC107765692	1461700	1.1941e+06	1.28881e+06	1.35437e+06	1.4847e+06	1.28004e+06
A0A1S3Z8G2	probable prolyl 4-hydroxylase 4	LOC107784132	36279	34167.1	18179.9	26572.5	0	31915.9
A0A1S4DCA1	WD-40 repeat-containing protein MSI2-like	LOC107828303	21287	6519.8	7675	0	13323	10206.5
A0A1S3XJX0	Eukaryotic translation initiation factor 3 subunit F	LOC107765783	202070	216406	425855	896789	371021	139318
A0A1S3XJZ1	Plasma membrane ATPase	LOC107765797	443040	453288	420993	443526	519285	427411
A0A1S3XJZ9	dipeptidyl-peptidase 5-like	LOC107766093	40875	33719.9	27525	32677.3	33434.8	28514
A0A1S4CVN6	calvin cycle protein CP12-3, chloroplastic-like	LOC107823204	0	0	0	36994.7	71347.7	24545.8
A0A1S3XK37	60S ribosomal protein L10-like	LOC107766087	109900	82581.4	113325	119435	113600	96956.6
A0A1S3XK44	uncharacterized protein At4g15545-like	LOC107766011	83263	92052.7	87962.9	90591.1	98943.2	82991.6
A0A1S3XKB8	protein TIC110, chloroplastic-like isoform X2	LOC107766127	270720	252844	272865	334145	296528	234575
Q9SNY7	Sucrose-phosphate synthase	SPSA	0	52810.1	0	0	71612.6	0
A0A1S3ZLM0	coatomer subunit beta-1-like	LOC107788062	129690	109051	94635.4	0	138356	70883.5
A0A1S4A6J2	Peroxidase	LOC107794292	968060	1.12246e+06	594543	516185	1.16877e+06	916878
A0A1S3Y583	probable protein phosphatase 2C 5	LOC107772254	26809	60021.2	10204.4	12429.8	18195.6	10437.2
A0A1S3XKA7	GrpE protein homolog	LOC107766184	687240	665955	473455	1.10426e+06	544835	1.0348e+06
A0A1S3XKB9	Uridine 5-monophosphate synthase	LOC107765924	0	0	0	406322	0	0
A0A1S4DAA2	3-isopropylmalate dehydratase small subunit 3-like	LOC107827507	1278200	1119317	1.36271e+06	1290283	980109	1.41342e+06
A0A1S3XKF9	eukaryotic translation initiation factor 2 subunit beta-like	LOC107766230	524320	522184	639444	553144	370953	363840
Q9SMB6	Phragmoplastin	phragmoplastin	1422900	1.42096e+06	1.47713e+06	2167057	2.40784e+06	2.37251e+06
A0A1S4BHC4	uncharacterized protein LOC107808255	LOC107808255	0	88007.8	106208	126469	103285	121302
A0A1S3XKL8	Eukaryotic translation initiation factor 3 subunit L	LOC107766223	1409800	740810	684649	762806	848955	994528
A0A1S3XKM0	Glutamine synthetase	LOC107766022	4119800	6.04423e+06	4.49134e+06	5.13257e+06	6.52894e+06	4.63067e+06
A0A1S3XKM5	Peptide deformylase	LOC107766294	333140	209242	334829	104038	384393	353256
A0A1S3XKN4	LOW QUALITY PROTEIN: histone H1-like	LOC107766305	127220	821562	575883	595764	631106	332951
A0A1S4AF47	uncharacterized protein LOC107796979 isoform X2	LOC107796979	90136	41350.9	113628	114859	63759.6	67899.6
Q67BD0	Heat shock protein 70-3	HSP70-3	4172100	4.43757e+06	3.81348e+06	1.84518e+06	5.15318e+06	1.65751e+07
Q9FEV9	65-kDa microtubule-associated protein 1-like	map65-1a	187190	89690.9	116276	79129.8	126155	70843.7
A0A1S3XL56	maf-like protein DDB_G0281937 isoform X5	LOC107766389	101120	179937	117045	160735	97177.2	118770
A0A1S3XKZ9	fasciclin-like arabinogalactan protein 17	LOC107766400	231810	339073	95826.1	228459	362077	373506
Q6T7F3	Amidophosphoribosyltransferase	purF	572260	103596	312045	231663	177094	125328
A0A1S3XL21	probable ribosome-binding factor A, chloroplastic	LOC107766361	117580	305631	4248.9	119753	388808	257524
A0A1S3XL99	heat shock 70 kDa protein 15-like	LOC107766483	44444	33659.1	0	29671.5	31328.2	29094.6
A0A1S3XZR3	dnaJ homolog subfamily C member 17-like	LOC107770533	0	0	0	0	64776.8	53006.7
Q6Q8A4	Phosphotransferase	Hxk3	106100	112675	346383	110539	349795	350491
A0A1S3XLC2	protein SPA, chloroplastic	LOC107766449	0	168479	129104	170277	0	104675
A0A1S3Z5M3	Alpha-1,4 glucan phosphorylase	LOC107783249	324570	308386	320283	309195	200143	329235
A0A1S3XLD0	Histone acetyltransferase	LOC107766476	290390	407100	272450	310485	480766	321957
A0A1S3XLD8	6-hydroxynicotinate 3-monooxygenase-like	LOC107766232	20375	0	38880.8	16985.7	31210.1	26569.7
A0A1S3XWR1	Sucrose synthase	LOC107769655	31807	668794	33101.8	37677.5	522909	30056.8
Q9LW96	Inositol-3-phosphate synthase		82324	44731.8	40892.3	61651.6	174135	125571
A0A1S3XLI2	Lysine--tRNA ligase	LOC107766274	0	58229.2	0	0	70289.3	77842.2
A0A1S3Y4V8	uncharacterized protein LOC107772213	LOC107772213	15721	19662.1	12510.1	16904.8	15359.6	23204.2
A0A1S3XLL1	phosphoglucan phosphatase LSF1, chloroplastic-like	LOC107766450	101710	99152.8	139677	112259	91164.8	133147
A0A1S3XLN6	Coatomer subunit beta	LOC107766461	235050	207451	183608	221599	183974	40444
A0A1S4D237	alpha,alpha-trehalose-phosphate synthase [UDP-forming] 5-like isoform X2	LOC107825166	71668	70328.3	24426.8	52703.7	65958	77227.3
A0A1S3XLS3	oxygen-evolving enhancer protein 1, chloroplastic-like isoform X3	LOC107766588	6537900	8.07936e+06	7.60785e+06	8.5336e+06	5.2659e+06	6.87379e+06
A0A1S3Z2U3	Peptidyl-prolyl cis-trans isomerase	LOC107782152	239520	0	302887	132325	203561	258818
A0A1S3XM12	Beta-galactosidase	LOC107766584	138820	213777	64306.3	199352	454780	194196
A0A1S4C8H7	uncharacterized protein LOC107816357 isoform X2	LOC107816357	10724	9571.9	8809.4	0	0	0
A0A1S3XLX4	fruit protein pKIWI502-like	LOC107766402	4493200	3.5978e+06	4.553e+06	4.14185e+06	3.22227e+06	3.34333e+06
A0A1S3XLY1	polyadenylate-binding protein 2-like	LOC107766555	98414	62988.4	64608.5	43563.3	49498.6	164380
A0A1S3XLY5	3-ketoacyl-CoA synthase	LOC107766412	290730	141918	232310	154336	139480	199029
A0A1S4A749	uncharacterized protein LOC107794473	LOC107794473	237380	133109	120542	124759	0	0
A0A1S4B6E7	CDPK-related kinase 4-like isoform X2	LOC107805057	0	0	42829.1	0	60694.3	0
A0A1S3XM26	caltractin-like	LOC107766669	418870	465762	448609	384044	413337	518830
A0A1S3XM28	enhancer of mRNA-decapping protein 4-like	LOC107766595	386320	439955	429100	359770	528758	357525
A0A1S3XM34	importin subunit beta-1	LOC107766463	0	0	0	31720.1	0	54442.2
A0A1S3XM68	uncharacterized protein LOC107766695	LOC107766695	63138	54659.8	42235.7	59481.2	45643.2	53998.7
A0A1S3XM70	vesicle-associated protein 1-2-like	LOC107766713	106930	132491	89864.2	81736.4	108351	98015
A0A1S4AAQ5	vacuolar protein sorting-associated protein 45 homolog isoform X2	LOC107795570	0	0	0	0	50534.1	0
A0A1S3XMA7	60S acidic ribosomal protein P2-2-like	LOC107766732	0	0	2.46007e+06	0	0	0
A0A1S3XMC0	pantothenate kinase 2	LOC107766785	339310	379166	249343	386880	307835	376205
A0A1S3XN61	uncharacterized protein LOC107766766 isoform X2	LOC107766766	127890	184556	184093	120562	58710.5	106029
A0A1S3XMD5	ATP citrate synthase	LOC107766682	3203900	3.62869e+06	3350817	3.2233e+06	4.43106e+06	2.37937e+06
A0A1S4AKE8	probable inactive receptor kinase At5g10020	LOC107798672	12828	11939.9	0	10513.3	0	0
A0A1S3XMH2	uncharacterized protein LOC107766813	LOC107766813	13739	10965.9	11665	11671.2	11879.2	9902
A0A1S3XMJ9	uncharacterized protein LOC107766837 isoform X1	LOC107766837	125460	176418	133683	180791	58450.1	159380
A0A1S3XMM0	ATP-dependent Clp protease proteolytic subunit	LOC107766615	246850	200413	246442	218334	223755	214347
A0A1S3XMP8	uncharacterized protein LOC107766836 isoform X3	LOC107766836	0	0	10060.7	9299.6	18102.7	0
A0A1S4BZ69	4-hydroxy-tetrahydrodipicolinate reductase 1, chloroplastic-like	LOC107813436	60893	68069.2	177412	60268.5	58936.4	193798
A0A1S3XMU0	Coproporphyrinogen oxidase	LOC107766888	6108000	5.56223e+06	2.45512e+06	7.2124e+06	8.19391e+06	5.29525e+06
A0A1S3XMU7	UDP-D-apiose/UDP-D-xylose synthase 2-like	LOC107766884	49634	0	30809.2	43480.4	45155.8	29393.2
A0A1S4D4H2	Protein-synthesizing GTPase	LOC107825776	40524	0	39195.1	25669.5	0	38334.9
A0A1S4DSA8	cyprosin-like	LOC107832672	105190	108507	0	139194	131154	178691
A0A1S3XMZ5	1,4-dihydroxy-2-naphthoyl-CoA synthase, peroxisomal-like	LOC107766707	562960	471523	433911	838024	635028	551810
A0A1S3XN09	Probable alanine--tRNA ligase, chloroplastic	LOC107766724	200570	189091	25905.7	218764	208377	214159
A0A1S3XNA5	elongation factor 1-gamma 2-like isoform X2	LOC107766924	1351300	1.1675e+06	1.16933e+06	1.21688e+06	1.09771e+06	1.17951e+06
A0A1S4BV93	AP-2 complex subunit mu-like	LOC107812244	235070	300614	189127	30974.8	196072	70483.1
A0A1S3XNC2	Catechol oxidase	LOC107767076	60139	0	0	0	0	0
A0A1S4D4T2	3-ketodihydrosphingosine reductase-like	LOC107826014	7652.7	10509.2	7905.2	6722.9	6234.6	7406.6
A0A1S3XNF6	protein NEOXANTHIN-DEFICIENT 1-like isoform X1	LOC107766995	21773	56601.6	36601.3	36850.3	26408.6	32643.6
A0A1S3XNF9	calcium-dependent protein kinase SK5-like	LOC107766827	198240	153879	100030	78179.7	164881	194362
A0A1S3XNH9	probable aldo-keto reductase 2 isoform X1	LOC107767026	639340	311287	320152	390422	455113	615414
A0A1S3XNJ1	protein HOTHEAD-like	LOC107767080	223910	206718	176158	114849	207884	186820
A0A1S3XNK4	uncharacterized protein LOC107766858	LOC107766858	40039	45791.8	35140.7	34717.8	32291.5	44975.2
A0A1S3XNK7	aldo-keto reductase family 4 member C10-like isoform X1	LOC107767146	86802	115524	130337	109556	117714	109758
A0A1S3XNL7	interactor of constitutive active ROPs 1-like	LOC107767156	44968	40202	45333.9	0	1397.4	0
A0A1S3XNM9	tubulin-folding cofactor B-like	LOC107767110	35255	26509.8	35513.7	30862.2	32970.4	32474.4
A0A1S3XPV1	mannose-1-phosphate guanyltransferase alpha-like isoform X3	LOC107767406	26213	23225.3	22219.2	0	18494.9	25738
Q9FXS3	Probable phospholipid hydroperoxide glutathione peroxidase		8428.1	39120.1	115690	182439	223067	0
A0A1S3XNS7	HECT-type E3 ubiquitin transferase	LOC107767217	38970	46841.2	324549	29609	308948	128778
A0A1S3XP60	coiled-coil domain-containing protein 18-like isoform X1	LOC107767246	126380	78050.5	86541.6	30643.1	97622.2	204968
A0A1S3XPR5	UDP-glycosyltransferase 74G1-like isoform X2	LOC107767244	0	194705	14240.6	189227	193240	12653.3
A0A1S3XP46	uncharacterized protein ycf37-like	LOC107767235	390910	409435	689278	794594	546532	825005
A0A1S3XP56	Ferredoxin	LOC107767245	480420	204215	338256	420102	292067	312634
A0A1S3XP71	Glyceraldehyde-3-phosphate dehydrogenase	LOC107767301	10927000	8.32025e+06	1.70366e+07	1.18238e+07	7.61045e+06	1.45479e+07
A0A1S4AE48	thylakoid membrane protein ssl2009-like	LOC107796677	344920	347232	349001	172621	429678	54315
A0A1S3ZA30	heterogeneous nuclear ribonucleoprotein 1-like	LOC107784632	131620	86189.6	130094	55142.4	77493.2	28862.4
A0A1S4APZ9	protein MITOFERRINLIKE 1, chloroplastic-like	LOC107800125	66965	52198.5	50770.2	107385	66963.7	48484.4
A0A1S3XQ45	dTMP kinase	LOC107767328	17939	13411.5	13628.1	14116	19102.7	14587.7
A0A1S3XPE4	serine/threonine-protein phosphatase 2A 65 kDa regulatory subunit A beta isoform-like	LOC107767339	1556400	1.64813e+06	1.64544e+06	1.01769e+06	1.55259e+06	1.60177e+06
A0A1S4BV85	probable 26S proteasome non-ATPase regulatory subunit 3	LOC107812249	1341400	1.82451e+06	1.60814e+06	1.55544e+06	1.58505e+06	1.28944e+06
A0A1S3XPF8	Calcium-transporting ATPase	LOC107767367	71270	0	45097.4	0	0	0
A0A1S3XPG2	Superoxide dismutase	LOC107767307	7794400	7128144	5.42647e+06	7.72071e+06	4.41558e+06	8.41396e+06
A0A1S3XPH5	uncharacterized protein LOC107767364	LOC107767364	0	47974.5	0	38601	0	0
A0A1S4DAF8	C-terminal binding protein AN-like	LOC107827726	35241	25629	29944	27306.5	11780.6	26669.2
A0A1S4B2L1	Threonine synthase	LOC107803812	2335800	2.06299e+06	2.20028e+06	2.38758e+06	1.80924e+06	2.36743e+06
A0A1S3XPN7	subtilisin-like protease SBT1.9	LOC107767414	458450	258542	426774	205966	134400	240536
A0A1S4CT71	Guanosine nucleotide diphosphate dissociation inhibitor	LOC107822292	82071	68466.1	69927.5	81039.1	39948.4	67241.5
A0A1S3XPR7	Shikimate kinase	LOC107767446	73715	80244.8	90712.3	90159.1	92075.3	43046.3
A0A1S3XPT7	6-phosphofructo-2-kinase/fructose-2, 6-bisphosphatase-like	LOC107767398	38696	0	512.9	41446.1	0	0
A0A1S3XPU7	uncharacterized protein LOC107767453	LOC107767453	358500	383440	191412	276126	111520	113074
A0A1S3XPX1	isoflavone reductase-like protein	LOC107767471	322290	183823	231946	167932	145707	427942
A0A1S4B3D6	uncharacterized protein LOC107804126	LOC107804126	575940	594400	427361	420614	479516	277907
Q9XF71	Chloride channel protein		390530	275865	377405	357415	213824	391821
A0A1S4BUV2	putidaredoxin-like	LOC107812133	206810	211651	0	225428	152197	239010
A0A1S4ACV6	developmentally-regulated G-protein 3-like	LOC107796147	285040	223130	226225	174198	331240	280672
A0A1S3XQ27	uncharacterized protein LOC107767512	LOC107767512	563680	268450	303766	472356	385230	504231
A0A1S3XQ32	histone-lysine N-methyltransferase setd3-like	LOC107767517	3476300	4.60327e+06	3985116	4.42738e+06	6.21358e+06	3.83626e+06
A0A1S4AP04	rRNA methyltransferase 1, mitochondrial-like	LOC107799835	59860	53637.6	62741.5	68777.2	56511	58164.9
A0A1S3XQ62	Fructose-bisphosphate aldolase	LOC107767559	2790600	5.14266e+06	4.14109e+06	4.87621e+06	4.62326e+06	2.79654e+06
A0A1S3XQ74	geranylgeranyl pyrophosphate synthase, chloroplastic-like	LOC107767573	0	19559.5	24008.3	25669.5	20868.7	0
A0A3G1CIK9	Phytochrome		195660	8269.7	178544	7650.4	43760.2	0
A0A1S3XQ81	Trafficking protein particle complex subunit 2-like protein	LOC107767365	41957	40955	0	38230.4	26299.7	0
A0A1S3XQA4	Coatomer subunit delta	LOC107767589	1000800	949257	966833	1.15975e+06	893334	1.07197e+06
A0A1S3YNS5	tropinone reductase homolog At5g06060-like	LOC107778082	210780	228629	176987	181231	177220	117785
Q711R1	Allene-oxide cyclase	aoc	333050	438217	361232	330275	366090	362845
A0A1S3XQG5	cleavage and polyadenylation specificity factor subunit 1-like	LOC107767638	18121	18886.1	15522.4	14938.1	23596.8	16742.1
A0A1S3XQG9	uncharacterized protein LOC107767592	LOC107767592	60311	71173.6	88782.6	637760	67813.4	70849.2
A0A1S3XQI3	uncharacterized protein LOC107767606	LOC107767606	39260	56594.3	33420.2	42312.2	67410.9	51102.2
A0A1S3XQI4	60S ribosomal protein L3-2	LOC107767586	1782700	2.48864e+06	2.06807e+06	1.83258e+06	2.40693e+06	1.89031e+06
A0A1S4AG05	Prohibitin	LOC107797276	113740	81533	48653.5	155217	29668.9	102033
A0A1S4DHY9	eIF-2B GDP-GTP exchange factor subunit epsilon	LOC107830039	101990	106831	93903.5	106280	119331	103048
A0A1S4DD69	uncharacterized protein LOC107828372 isoform X3	LOC107828372	101840	0	198184	0	0	70987.4
A0A1S3XQM4	uncharacterized protein LOC107767482	LOC107767482	153510	150642	99672.4	75321.3	139056	100343
A0A1S4AQA4	peptide chain release factor PrfB1, chloroplastic-like	LOC107800112	0	0	0	74307.7	99819.4	0
A0A1S3XQS2	uncharacterized protein LOC107767653	LOC107767653	362600	340802	193898	335076	302698	261395
A0A1S3XQS5	nuclear pore complex protein NUP98A-like	LOC107767733	38868	34507.5	49386.4	53973.2	44579	45165.4
A0A1S3XQV7	Thiamine phosphate synthase	LOC107767671	1669200	2.13505e+06	2.14277e+06	1.80627e+06	1.89593e+06	1.84884e+06
A0A1S3XQU9	Pectin acetylesterase	LOC107767541	4907300	6.51418e+06	5089150	6400942	4260542	5.51412e+06
A0A1S3XQZ7	Asparagine--tRNA ligase	LOC107767713	1374200	1.49302e+06	912107	1.52698e+06	1401221	1.1397e+06
A0A1S3XR14	Eukaryotic translation initiation factor 3 subunit K	LOC107767811	518070	522854	504215	549898	514951	446865
A0A1S3XR26	ATP synthase subunit delta, mitochondrial-like	LOC107767598	422580	181906	364194	167635	256483	117708
A0A1S3XR31	katanin p60 ATPase-containing subunit A-like 2	LOC107767825	36896	15584.8	23521.1	21314.3	23789.4	17402.4
A0A1S3XR72	33 kDa ribonucleoprotein, chloroplastic	LOC107767634	500570	0	491407	37106.3	7414.7	364957
A0A1S3XRB8	signal peptide peptidase-like	LOC107767668	77435	32488.2	27013.6	36520.6	100186	0
A0A1S3XRC7	probable polyamine oxidase 5	LOC107767845	86949	108214	68052.4	115647	112234	73211.5
A0A1S4CLK3	ubiquitin-conjugating enzyme E2 7-like	LOC107820117	186690	170553	188642	132919	58950.1	179575
A0A1S3XRI1	NADP-dependent D-sorbitol-6-phosphate dehydrogenase-like	LOC107767965	413470	404848	255630	405933	296012	198487
A0A1S3XRI8	L-ascorbate oxidase homolog	LOC107767898	473400	457331	441735	490303	670497	652353
A0A1S3XRJ7	chaperonin CPN60-like 2, mitochondrial	LOC107767906	158550	15809.9	471928	45577.1	368476	39772.7
A0A1S3ZSR5	Reticulon-like protein	LOC107790060	32638	21663.7	0	0	0	0
A0A1S3XRK1	ribonuclease J-like	LOC107767987	637690	510024	545972	619106	459207	640188
A0A1S3XRL1	protein Iojap, chloroplastic-like	LOC107767994	53166	0	0	76106.5	84378.3	0
A0A1S3XRM3	oxygen-evolving enhancer protein 3-2, chloroplastic-like	LOC107767928	66713000	7.34631e+07	7.55559e+07	5.06459e+07	8.16697e+07	52785471
A0A1S3XRN0	Photosystem II reaction center Psb28 protein	LOC107768014	78414	50100.6	69492.9	0	63970.6	86584.9
A0A1S3XRP4	putative late blight resistance protein homolog R1B-14	LOC107767781	391630	407382	0	0	0	0
A0A1S3XRP6	DNA-binding protein DDB_G0278111-like isoform X2	LOC107768029	98548	98607.1	92606.6	88833.3	111824	75012
A0A1S3XRQ7	putative leucine-rich repeat-containing protein DDB_G0290503	LOC107767970	0	32471.4	42447	61161.2	118139	113461
A0A1S3ZQZ5	uncharacterized protein LOC107789395	LOC107789395	0	96562.7	0	116763	35924.4	82587.9
A0A1S3XRS7	50S ribosomal protein L22, chloroplastic	LOC107767990	612200	478257	530608	238799	343763	469139
A1E257	Chloroplast phosphate transporter (Fragment)	Pht2;1	117340	216563	181384	166458	152358	205145
A0A1S3XS26	Lactoylglutathione lyase	LOC107767887	2306800	3.91756e+06	3.06222e+06	1684647	2.70634e+06	2.04216e+06
A0A1S4CM36	Small nuclear ribonucleoprotein Sm D1	LOC107820528	792140	43780.8	709626	766850	742696	53858.3
A0A1S3XS48	uncharacterized protein LOC107768113	LOC107768113	243790	17434.4	92579.3	135693	15121.1	86879
A0A1S3XS65	NADH:ubiquinone reductase (non-electrogenic)	LOC107767923	233570	282788	183679	187855	229420	88299.1
A0A1S3XS80	Acetyltransferase component of pyruvate dehydrogenase complex	LOC107768212	2027600	2.34368e+06	2.108e+06	2.72656e+06	1.85339e+06	2.21469e+06
A0A1S3XS81	glutamate synthase [NADH], amyloplastic-like	LOC107767943	793970	333219	469684	459979	521189	385075
A0A1S3XSC6	Hydroxymethylbilane synthase	LOC107767993	7603000	6.25024e+06	7.70074e+06	8.5636e+06	7.15346e+06	7.67429e+06
A0A1S4CDI2	uncharacterized protein LOC107817897	LOC107817897	14153	18664	16300.7	13458.7	17626.8	16466.7
A0A1S3XSK7	Potassium transporter	LOC107768329	38949	0	31212.6	37205.6	33105.7	37867.1
A0A1S3XSK8	oxysterol-binding protein-related protein 3A-like	LOC107768322	551940	509249	614183	551956	596244	622415
A0A1S3XSM1	uncharacterized protein LOC107768083	LOC107768083	349550	365970	409520	285330	321596	286212
A0A1S3XSM8	erlin-2-B-like	LOC107768286	172310	215013	268619	341188	325587	303831
A0A1S3XSN6	50S ribosomal protein L12, chloroplastic	LOC107768292	24057000	9.82908e+06	2.09678e+07	2.36537e+07	2.49121e+07	2.1793e+07
A0A1S3XSP4	5-methyltetrahydropteroyltriglutamate--homocysteine S-methyltransferase	LOC107768359	174720	156748	232896	215446	99223	35998
A0A1S3XSQ1	60S ribosomal protein L23	LOC107768301	2781000	2.02989e+06	528020	646216	2.31163e+06	1.79376e+06
A0A1S4D955	Succinate--CoA ligase [ADP-forming] subunit beta, mitochondrial	LOC107827369	2157900	1473221	1.80586e+06	2.49672e+06	1.92644e+06	2007989
A0A1S3XSR0	50S ribosomal protein L15, chloroplastic-like	LOC107768370	421330	427366	388332	443455	389679	444730
A0A1S3XSS8	ultraviolet-B receptor UVR8-like	LOC107768388	337360	152192	322861	215836	340713	330130
A0A1S4AW09	thylakoid membrane protein TERC, chloroplastic-like isoform X1	LOC107801959	34352	42177.3	118015	120265	126877	130725
A0A1S3XSV4	3-dehydroquinate synthase, chloroplastic-like	LOC107768348	1166500	1.72061e+06	1.81506e+06	2.10829e+06	1.61807e+06	1.791e+06
A0A1S3XSW1	UDP-sulfoquinovose synthase, chloroplastic-like	LOC107768419	1993200	1.31853e+06	2.51819e+06	3.19679e+06	2.68593e+06	2.15851e+06
A0A1S3XSW3	shikimate O-hydroxycinnamoyltransferase-like	LOC107768362	62126	72950.9	73967.9	84746.3	109042	162123
A0A1S4DCH4	caffeoylshikimate esterase-like	LOC107828263	47961	90474.4	80418	49310.9	88036.4	68823.1
A0A1S4D6V2	protein PAF1 homolog	LOC107826626	10958	9784.5	10028.6	7463.9	12433.1	8452
A0A1S4DG83	Serine/threonine-protein phosphatase	LOC107829428	29531	12800.9	33862	25291.7	8270.2	24950.6
O24141	Plastid-lipid-Associated Protein (Fragment)	pap	1811800	1.45919e+06	2.22323e+06	1918276	1.93962e+06	1.49073e+06
A0A1S3XT72	monodehydroascorbate reductase 4, peroxisomal-like	LOC107768281	1280800	1.21609e+06	1.17934e+06	1.23254e+06	1.49101e+06	1.02693e+06
A0A1S3XT76	uncharacterized protein LOC107768530	LOC107768530	50862	431074	17751.3	17705.4	27860.4	18788.1
A0A1S3XT86	NPL4-like protein 1	LOC107768545	529660	507102	422701	392296	2.70577e+06	454673
A0A1S3XT93	uncharacterized protein LOC107768484	LOC107768484	2753800	3.60272e+06	2.56894e+06	3.10096e+06	5.8379e+06	2.68407e+06
A0A1S4C1G1	Proteasome subunit alpha type	LOC107814160	362520	325803	114174	301936	347994	251397
A0A1S3XTA9	thioredoxin-like 3-2, chloroplastic isoform X1	LOC107768494	85434	53032.2	25499.3	70146	98860.7	87039.4
A0A1S3XTC0	low-temperature-induced cysteine proteinase-like	LOC107768587	271060	307056	243551	217044	292480	0
A0A1S3XTD4	protein MODIFIER OF SNC1 11-like	LOC107768338	71230	15263.2	23608.1	15087.6	19221.9	19562.3
A0A1S3XTD5	K(+) efflux antiporter 2, chloroplastic-like	LOC107768522	2608400	2.39867e+06	3.45109e+06	2.69083e+06	2.68215e+06	2.68407e+06
A0A1S3XU48	2-C-methyl-D-erythritol 4-phosphate cytidylyltransferase	LOC107768615	1624500	716491	819312	685909	922737	208054
A0A1S3ZW20	Histone H2A	LOC107791080	301350	18288	50482.1	21424.9	383532	0
A0A1S3XTF3	40S ribosomal protein S7	LOC107768552	2926900	3.36979e+06	3.98714e+06	3.55573e+06	4.59723e+06	3638070
A0A1S3XTF7	40S ribosomal protein S8	LOC107768559	142670	268429	225952	145368	190843	31189.3
U3PLK3	Leucine aminopeptidase	lap2	10803000	1.17975e+07	1.05551e+07	1.27104e+07	1.23815e+07	1.02995e+07
A0A1S3XTH4	basic form of pathogenesis-related protein 1-like	LOC107768378	34035	45776.1	32325.5	0	25241.2	19455
A0A1S3XTH9	uncharacterized protein At3g49720-like	LOC107768381	474710	498650	500859	391723	623709	441114
A0A1S3Z3I1	ylmG homolog protein 1-2, chloroplastic-like	LOC107782601	122940	496995	137504	137649	626083	117365
A0A1S3XTT2	Glutaredoxin-dependent peroxiredoxin	LOC107768657	53148	49437.6	59355.2	55496.6	43457.5	58458
A0A1S4BE88	Uroporphyrinogen decarboxylase	LOC107807289	1019900	993099	1.46622e+06	1.66775e+06	1.47347e+06	817673
A0A1S3XTW0	Carboxypeptidase	LOC107768692	464590	436457	503588	427822	360357	470245
A0A1S3XTY1	protease Do-like 1, chloroplastic	LOC107768772	3045900	6558169	3.0134e+06	3.14764e+06	3.50506e+06	4.93714e+06
A0A1S4BYM1	protein SLOW GREEN 1, chloroplastic-like	LOC107813268	340070	268659	251465	334749	309647	351476
A0A1S3XU16	calcium-binding allergen Ole e 8-like	LOC107768745	204310	384655	50308.2	0	202861	29016.1
A0A1S3XU22	plastoglobulin-1, chloroplastic-like isoform X2	LOC107768802	2016800	2.83144e+06	1.87308e+06	2.31919e+06	3.27513e+06	2.61782e+06
A0A1S3XU33	Glycerol-3-phosphate acyltransferase, chloroplastic	LOC107768804	1656600	1746897	1.57801e+06	926039	1.26762e+06	2027454
A0A1S4DDA2	60S ribosomal protein L13a-4-like	LOC107828558	347110	358690	285369	390863	320484	216216
A0A1S3XU57	Carbonic anhydrase	LOC107768773	122030000	1.10444e+08	1.34532e+08	1.39717e+08	7.05576e+07	1.08161e+08
A0A1S3XU58	Cytochrome b-c1 complex subunit 6	LOC107768841	196800	246644	328016	381331	414518	169224
A0A1S3XU71	branched-chain-amino-acid aminotransferase-like protein 1	LOC107768791	59107	75332.6	59069.2	63083.9	71324.8	135094
A0A1S3XU77	heat shock cognate protein 80-like	LOC107768797	21461000	2.12898e+07	1.91119e+07	1.81846e+07	2.22333e+07	1.98277e+07
A0A1S4DCB9	60S ribosomal protein L35a-3-like	LOC107828320	2425700	1.94286e+06	2.65273e+06	2.9521e+06	2.16519e+06	2.40171e+06
A0A1S4AVH2	ATP synthase subunit epsilon, mitochondrial-like	LOC107801741	103910	93565.1	60459.1	58233.2	43556.1	29452.9
A0A1S3XUB0	cell division cycle protein 48 homolog	LOC107768884	19450	17951.8	23115.8	26365.7	14257.6	18330.3
A0A1S3XUC9	copper transport protein ATX1-like	LOC107768675	1537200	1.86912e+06	1906637	1.40464e+06	1.11168e+06	1.9204e+06
A0A1S3XUD0	33 kDa ribonucleoprotein, chloroplastic-like	LOC107768838	1405900	1.54737e+06	1.39637e+06	1.27912e+06	1.85568e+06	1.01734e+06
Q6TKR0	Ribosomal protein L3A	RPL3A	4945600	4.26109e+06	4.61082e+06	5.23474e+06	5.74502e+06	2120355
A0A1S3XUH8	uncharacterized protein LOC107768941 isoform X1	LOC107768941	505780	1.42085e+06	1.27668e+06	1.45337e+06	1.3995e+06	940390
A0A1S3XUI1	14-3-3 protein 9-like isoform X1	LOC107768942	460180	519963	901554	382099	885857	700507
A0A1S3XUI5	Glycosyltransferase	LOC107768887	65842	0	0	0	21774.6	44295
P50218	Isocitrate dehydrogenase [NADP]		10766000	9.07708e+06	7.99429e+06	6.24287e+06	6.74258e+06	7.68524e+06
A0A1S3XUJ1	PLASMODESMATA CALLOSE-BINDING PROTEIN 3-like	LOC107768893	66831	97553.5	57907.7	81643.2	43246.5	35024.8
A0A1S3XUP8	ACT domain-containing protein DS12, chloroplastic-like	LOC107769014	1312200	943234	1.49078e+06	1.38519e+06	781892	1.41022e+06
A0A1S3XUP9	uncharacterized protein LOC107768935	LOC107768935	1009700	1.10811e+06	1.13476e+06	1.36625e+06	956062	1.3412e+06
A0A1S3Z1A3	elongation factor G-1, mitochondrial-like	LOC107781876	22894	18914.3	22995.5	24012	49047.9	57050.1
A0A1S3XUQ9	uncharacterized protein LOC107768943	LOC107768943	106480	131256	34526.1	96326.4	99110.7	150146
A0A1S4DJH3	Ribosomal protein	LOC107830403	2528100	2.32494e+06	2.67801e+06	2.78461e+06	2.60279e+06	2.3275e+06
A0A1S4BFJ4	folate synthesis bifunctional protein, mitochondrial-like isoform X2	LOC107807730	0	36381.2	0	36615.9	39435.8	22520.8
A0A1S3XUS7	uncharacterized protein LOC107769043 isoform X2	LOC107769043	277540	296027	158944	141396	285554	180117
A0A1S3XUT0	cytochrome b5-like	LOC107768957	13028	11092.6	8739.7	0	13156.7	12289.5
A0A1S3XUT4	cullin-3A-like	LOC107768960	90501	60329.2	84483.6	58678.5	69668.9	0
A0A1S4CPS4	ruBisCO large subunit-binding protein subunit alpha-like	LOC107821154	213200	201576	173348	181487	247688	156140
A0A1S3XUV5	endoplasmin homolog	LOC107769069	22094	27383.3	21795.6	0	25985.5	24337.9
A0A1S3XUV8	GDSL esterase/lipase At1g28590-like	LOC107768840	1317500	1.79413e+06	1.1848e+06	1.77095e+06	1.84398e+06	1.55753e+06
A0A1S3XV30	Translation initiation factor IF-3	LOC107769135	1383300	1.38042e+06	1.31166e+06	1.50047e+06	1.44904e+06	804069
A0A1S3XVT1	pullulanase 1, chloroplastic-like isoform X2	LOC107769155	92927	92690.6	89225.4	108634	96719.7	123536
A0A1S4BUU1	HIPL1 protein-like	LOC107812071	0	101868	96975.5	69584	0	97694.3
A0A1S3XV78	60S ribosomal protein L9-1-like	LOC107769103	38771	31338.2	37235.1	36482.8	46595	33213.2
A0A1S3XVA1	splicing factor 3B subunit 1-like	LOC107769132	62675	348803	44544.5	297892	446134	288889
A0A1S3XVB2	30S ribosomal protein S6 alpha, chloroplastic-like	LOC107768964	1113700	1.10654e+06	1.07694e+06	893513	850354	1.23923e+06
A0A1S3XVL0	serine/threonine-protein phosphatase 4 regulatory subunit 2-like isoform X2	LOC107769224	0	0	0	0	0	92293.8
A0A1S3XVE8	anthranilate phosphoribosyltransferase-like	LOC107769231	52150	28538.6	61857	65516.4	64017.6	30584.3
A0A1S4AAP6	glutamyl-tRNA(Gln) amidotransferase subunit A-like isoform X2	LOC107795571	163220	177340	233462	126909	161704	128237
A0A1S3XVH1	Ribonuclease	LOC107769187	346200	239909	306040	0	15959.4	0
A0A1S3XVK6	Acyl carrier protein	LOC107769281	113250	79737.9	107553	74405	99162.3	115772
A0A1S3XVL9	Short-chain dehydrogenase/reductase	LOC107769229	13434	24015	13691.8	0	11413.4	15963.5
A0A1S3XVM3	20 kDa chaperonin, chloroplastic-like	LOC107769079	11028000	1.20656e+07	1.2872e+07	1.51326e+07	1.41831e+07	9.53607e+06
A0A1S3XVN5	mitochondrial amidoxime reducing component 2-like isoform X2	LOC107769249	79641	37051.5	74929.2	56189.7	27932.7	78384.1
A0A1S3ZSH9	uncharacterized protein LOC107789935 isoform X2	LOC107789935	0	66117.9	40057.4	0	0	109415
A0A1S3Z2Y5	protein SSUH2 homolog isoform X3	LOC107782364	102960	209514	285227	153231	107824	153829
A0A1S3XVQ4	enoyl-[acyl-carrier-protein] reductase [NADH] 2, chloroplastic-like	LOC107769328	41771	338445	51881.1	398572	61775.7	40138.8
Q5DJV4	Fas-associated factor-like protein (Fragment)		17121	18677.6	17605.7	19698.8	4357.7	22728.7
W8SGE9	Siroheme synthase		9303.1	4438.1	7907.7	11901.6	10819.9	9469.2
A0A1S3XVT6	cytochrome b6	LOC107769160	18343000	2.89743e+07	2.13256e+07	1.57848e+07	2.14569e+07	1.53729e+07
A0A1S3XWI1	Lactoylglutathione lyase	LOC107769364	123190	551426	410005	258579	156211	533606
A0A1S4DHJ9	AP complex subunit sigma	LOC107829888	67028	167651	66948.6	155401	68865	69854.9
A0A1S3XW04	uncharacterized protein LOC107769423	LOC107769423	336980	382748	340894	379703	160534	311816
A0A1S3Y5U2	(+)-neomenthol dehydrogenase-like	LOC107772451	34718	28283	30562.6	36833.9	34719.2	33691
A0A1S4D5G3	ribose-phosphate pyrophosphokinase 4-like	LOC107826214	0	122646	0	0	0	125317
A0A1S3XW41	CCT-eta	LOC107769239	1549900	899821	994783	1.26735e+06	1.02057e+06	1.1418e+06
A0A1S3XW44	GDSL esterase/lipase APG-like	LOC107769403	3609300	3847279	2.75574e+06	2.17924e+06	2.89235e+06	3.48688e+06
A0A1S3ZD72	uncharacterized protein LOC107785539	LOC107785539	116360	96861.2	92732	96560.8	107144	76143.4
A0A1S4ASJ5	enhanced ethylene response protein 5-like	LOC107800906	0	25341	28830	30507.9	39458.7	17303.9
A0A1S3XW73	uncharacterized protein LOC107769424 isoform X1	LOC107769424	3820900	1.53229e+06	964246	1890736	1.24756e+06	2.0123e+06
A0A1S3XW91	blue-light photoreceptor PHR2-like	LOC107769279	141030	111816	302917	223278	510352	166934
A0A1S3XW99	Ubiquitinyl hydrolase 1	LOC107769508	152990	148160	125404	68444.5	190063	0
A0A1S3XWA6	Peptidyl-prolyl cis-trans isomerase	LOC107769297	183190	166929	117267	176082	136831	148575
A0A1S3XWB1	Tryptophan--tRNA ligase	LOC107769302	322800	328453	270075	363630	417580	230594
A0A1S3XX01	GDSL esterase/lipase At1g33811-like isoform X2	LOC107769523	995980	369562	1.2689e+06	130758	847292	1.16646e+06
A0A1S3XWD3	Phosphoglycerate mutase (2,3-diphosphoglycerate-independent)	LOC107769473	6445100	5454353	7.38193e+06	8888855	7.99266e+06	4.92243e+06
A0A1S4BBK1	SNARE-interacting protein KEULE-like isoform X2	LOC107806541	35548	24765.9	28766.3	38171	37432.4	27773
A0A1S3XWH6	5-methylthioadenosine/S-adenosylhomocysteine nucleosidase	LOC107769361	276130	164624	176522	106710	442178	165120
A0A1S4BBK2	Deoxyribodipyrimidine photo-lyase	LOC107806543	0	0	0	26425.1	0	0
A0A1S3XWK1	Glutathione transferase	LOC107769388	597790	371405	625212	261138	273295	266991
A0A1S3XWM1	uncharacterized protein LOC107769616	LOC107769616	87622	78134.3	147299	83519.8	111462	32214.5
A0A1S3XWM6	(-)-isopiperitenol/(-)-carveol dehydrogenase, mitochondrial-like	LOC107769567	33006	34778.7	37539.4	36830.9	36970.3	36446
A0A1S3XWN7	uncharacterized protein LOC107769629	LOC107769629	458550	375364	469887	586714	407064	306784
A0A1S3XWP6	transmembrane protein 87A-like	LOC107769641	249340	316398	98434.1	340165	143058	96848.2
A0A1S4B629	(S)-coclaurine N-methyltransferase-like	LOC107804877	57945	42512.5	46278	53002.7	60165.7	54312.8
H6UM40	Calcium-dependent protein kinase	CDPK13	0	59802.3	71621.7	62894.5	67951	81359.2
A0A1S3XWR8	uncharacterized protein LOC107769601	LOC107769601	399390	633581	993246	658092	410011	748196
A0A1S3XWS4	GDT1 family protein	LOC107769454	175500	302101	246118	268151	307789	156439
A0A1S3XWU4	uncharacterized protein LOC107769471	LOC107769471	1809100	1.91479e+06	2.14914e+06	1.76962e+06	1.5534e+06	277498
A0A1S3XWU9	23 kDa subunit of oxygen evolving system of photosystem II	LOC107769475	29654000	3.55674e+07	3.54288e+07	3.98695e+07	3.45712e+07	3.0654e+07
A0A1S4C9X8	pentatricopeptide repeat-containing protein At1g60770-like	LOC107816691	11585	6750.9	0	10981.2	0	10556.9
A0A1S3XWX6	eukaryotic translation initiation factor 3 subunit J-like isoform X2	LOC107769716	74725	115786	61652.8	65888.1	101670	41657.3
A0A1S3XWY6	PSI subunit V	LOC107769513	48855000	5.83444e+07	5.00596e+07	5.34326e+07	52649854	5.22413e+07
A0A1S3XX03	31 kDa ribonucleoprotein, chloroplastic	LOC107769683	1940700	1798532	1.89986e+06	2.05956e+06	1.88504e+06	1.6595e+06
A0A1S3XX64	Ethanolamine-phosphate cytidylyltransferase	LOC107769594	198850	174512	133289	256040	216943	99518
A0A1S4B8C3	calvin cycle protein CP12-2, chloroplastic-like	LOC107805556	673040	585193	881802	637555	515467	606389
A0A1S3XX96	probable glucan 1,3-alpha-glucosidase	LOC107769613	1071200	1079203	947031	1.06925e+06	1.19114e+06	1.32583e+06
A0A1S3XXB0	uncharacterized protein LOC107769833	LOC107769833	0	214521	0	0	0	0
A0A1S3XXF1	probable glutamyl endopeptidase, chloroplastic isoform X2	LOC107769805	293220	338382	306030	1.10487e+06	1.01245e+06	444786
A0A1S3YDV1	Pre-mRNA-processing factor 19	LOC107775142	309830	188714	281245	249232	244695	205931
A0A1S3ZTJ9	Chorismate synthase	LOC107790266	946800	957447	728388	1.05051e+06	1.07015e+06	1.0021e+06
A0A1S4AUY8	7-dehydrocholesterol reductase-like	LOC107801501	76777	78269.4	56120.5	75008	79779.8	50900.9
A0A1S3XXM0	vam6/Vps39-like protein	LOC107769880	109820	122081	101458	110354	60264.3	186510
A0A1S3XXM3	triosephosphate isomerase, chloroplastic-like	LOC107769721	0	0	1.48006e+07	1.69806e+07	0	0
A0A1S3XXN3	receptor-like protein 12 isoform X1	LOC107769731	1168100	879712	753668	770996	1.01709e+06	804722
A0A1S3XXN7	Glutamate-1-semialdehyde 2,1-aminomutase	LOC107769957	745210	873092	906759	924657	915077	675954
A0A1S3XXQ5	60S ribosomal protein L8-like	LOC107769978	0	849349	819262	0	1021037	0
A0A1S3XXU1	casein kinase II subunit alpha-like isoform X1	LOC107770013	88816	53826.1	113234	128998	102186	99813.3
A0A1S3XXV4	leucine-rich repeat extensin-like protein 1 isoform X2	LOC107770037	134460	157304	5755.2	40507.3	133907	113483
A0A1S3XXV5	WPP domain-interacting protein 2-like	LOC107769791	0	0	8506.7	12247.6	14305.8	6580.5
A0A1S4B8Y3	Pyridoxal phosphate homeostasis protein	LOC107805770	206240	134481	214631	219818	207609	213396
A0A1S3XXX1	uncharacterized protein At4g06744-like	LOC107770038	45731	49677.5	63071.1	16533.2	0	15828.6
A0A1S3YFL6	Transcription elongation factor	LOC107775588	0	7992	15259.6	12218.9	14476.6	12165.6
A0A1S3XXZ8	Mannose-1-phosphate guanylyltransferase	LOC107770019	1294000	264040	259158	568900	477865	255699
A0A1S4DPB8	persulfide dioxygenase ETHE1 homolog, mitochondrial-like	LOC107831711	451110	173778	138828	0	110405	23783.8
A0A1S4BRP3	pyridine nucleotide-disulfide oxidoreductase domain-containing protein 2-like isoform X6	LOC107811167	50360	0	0	48752.9	0	0
A0A1S3XY62	gamma-soluble NSF attachment protein-like	LOC107770086	175440	253713	151999	139921	209168	125516
A0A1S4B3Q6	monocopper oxidase-like protein SKS1	LOC107804105	185140	169013	0	168557	168665	0
A0A1S3XY76	uncharacterized protein LOC107770140	LOC107770140	0	33183.6	30483.8	40668	25803.2	32340.6
A0A1S3XY89	arginase 1, mitochondrial	LOC107770139	194990	50007.4	161289	156241	119045	186775
A0A1S3YX69	protein PROTON GRADIENT REGULATION 5, chloroplastic-like	LOC107780686	1071200	1.01392e+06	1.14528e+06	1105796	121877	1.15463e+06
A0A1S3XYZ1	COP9 signalosome complex subunit 3-like isoform X2	LOC107770159	113850	156591	16537.3	17460.7	138253	20804.3
A0A1S3XYE9	Tryptophan--tRNA ligase	LOC107770201	125650	126647	96962.3	129591	0	102855
A0A1S3XYF7	ATP-dependent zinc metalloprotease FTSH 10, mitochondrial-like	LOC107770012	179860	115398	179454	162793	169020	123193
A0A1S3XYH5	Inorganic diphosphatase	LOC107770183	175370	417165	139920	108030	132863	402870
A0A1S4DHR8	cytochrome c1-2, heme protein, mitochondrial-like	LOC107829859	50139	72721.6	74340.9	65223.6	80177.7	31588.6
A0A1S3XYH8	60S ribosomal protein L30	LOC107770030	480400	227026	198932	230732	416662	148631
A0A1S4D5M4	probable polygalacturonase	LOC107826279	0	0	0	41201.4	0	0
A0A1S3XYK9	basic blue protein-like	LOC107770257	38739	0	29635.7	18296.2	0	0
A0A1S3XYL6	probable inactive ATP-dependent zinc metalloprotease FTSHI 4, chloroplastic	LOC107770227	576580	430833	293496	389808	754680	238158
A0A1S3XZ55	Lipoxygenase	LOC107770253	31460	46880	23456.4	14226.6	31336.3	18927.5
A0A1S3XYQ4	60S ribosomal protein L13	LOC107770287	0	0	0	108552	0	35784.6
A0A1S3XYR2	la-related protein 1A-like	LOC107770309	22997	0	22796.4	23440.7	29590.9	15117.4
A0A1S3XYR4	carboxyl-terminal-processing peptidase 1, chloroplastic-like isoform X2	LOC107770295	138960	142515	126708	113416	114756	131521
A0A1S3XYS3	peroxisomal fatty acid beta-oxidation multifunctional protein AIM1-like	LOC107770112	100740	76469	96001	82030.2	65526.8	113118
A0A1S3Z8S7	protein argonaute 4-like	LOC107784197	234530	152926	136190	160356	420722	43330.6
A0A1S3YSD8	eukaryotic initiation factor 4A-3-like	LOC107779209	83200	18613.7	80148.1	40283.1	52311.6	102149
A0A1S3XYU8	cytochrome b5-like	LOC107770339	311630	736694	715044	662065	663134	616730
A0A1S3XYV0	uncharacterized protein LOC107770296	LOC107770296	164020	143908	138100	168209	203228	121800
A0A1S3XYV3	Serine/threonine-protein phosphatase	LOC107770342	190370	122615	197780	164236	102038	95309.8
A0A1S3ZJZ9	Methionine aminopeptidase	LOC107787598	136990	110968	108351	103239	81396.7	117155
A0A1S3ZJY3	tubulin-folding cofactor D-like	LOC107787597	49244	74873.9	9539.5	61303.5	0	96020.9
A0A1S4BGN4	26S proteasome non-ATPase regulatory subunit 4 homolog	LOC107808066	176640	180670	309639	182747	230486	232529
A0A1S4DE96	4-hydroxy-4-methyl-2-oxoglutarate aldolase	LOC107828905	238750	291743	265546	280078	411399	283680
A0A1S3XZ08	putative quinone-oxidoreductase homolog, chloroplastic	LOC107770378	2202600	2.28922e+06	2.27084e+06	2.33752e+06	2.38548e+06	2.51209e+06
A0A1S4ALC5	probable serine/threonine-protein kinase DDB_G0291350	LOC107798951	100380	74181.6	80770.8	116948	139755	100433
A0A1S3Y0V4	ATP-dependent Clp protease proteolytic subunit	LOC107770894	100780	94888	100575	85295	91826.5	127319
Q9ZR57	Ribonucleoside-diphosphate reductase		0	0	29280.9	13623.6	11583.4	0
O82444	Peroxin-5 (Fragment)	PEX5	15061	31252.3	35020.4	36605.6	24228.7	35371
A0A1S3XZE8	uncharacterized protein LOC107770417 isoform X5	LOC107770417	24194	30855.3	114022	124943	132519	35801.2
A0A1S4AIX7	clavaminate synthase-like protein At3g21360	LOC107797968	153110	152747	18890.5	230097	151693	48832.8
A0A1S3XZ48	uncharacterized protein LOC107770391	LOC107770391	41784	60973.3	11280.9	46100.3	30412	29398.7
A0A1S3XZ80	Acetohydroxy-acid synthase small subunit	LOC107770361	423490	454598	382136	454225	441386	385252
A0A1S4AI62	lysM domain receptor-like kinase 3	LOC107797966	0	53519.2	33601.2	39743.5	27202.2	44240.8
Q14TE3	Serine C-palmitoyltransferase	NtLCB2	17208	14348.9	33978.2	35602.3	11627	9858.1
A0A1S3XZB0	Pyruvate dehydrogenase E1 component subunit alpha	LOC107770390	257400	239920	243035	220012	42678.8	255633
A0A1S3XZB5	Germin-like protein	LOC107770478	393450	385356	451510	341813	341229	381967
A0A1S4BLH7	uncharacterized protein LOC107809544	LOC107809544	174300	178314	148765	178795	207666	178337
A0A1S3XZG8	26S protease regulatory subunit 6B homolog	LOC107770439	837770	771812	620531	719694	824288	619617
A0A1S3XZK3	membrane steroid-binding protein 2-like	LOC107770471	22992	419563	16102.6	13769	18490.3	17675.5
A0A1S4A3I6	uncharacterized protein LOC107793376 isoform X2	LOC107793376	26787	28986.8	20203.6	25754.5	25744.7	27429
A0A1S3XZX0	uncharacterized protein LOC107770682	LOC107770682	142550	218689	251203	29249.7	392397	121933
Q40521	Ras-related protein Rab11B	RAB11B	0	71200.8	52974.8	59761.7	0	0
A0A1S4C466	trafficking protein particle complex subunit 6B-like	LOC107814879	26884	25027.8	26552.6	30144.5	21232.2	27117.1
A0A1S4BEC6	Histone H2B	LOC107807323	11976	759768	225962	572944	811972	365621
A0A1S3Y035	ribulose bisphosphate carboxylase/oxygenase activase, chloroplastic-like	LOC107770767	595610	215401	575539	540264	359955	785920
A0A1S3ZUS5	calcineurin B-like protein 3 isoform X2	LOC107790626	126440	107470	63259.1	79605.8	134778	0
A0A1S3Y048	Peroxidase	LOC107770624	3076900	3.09569e+06	2.18644e+06	2.54985e+06	2.18824e+06	2.26059e+06
A0A1S3Y055	Photosystem I reaction center subunit III	LOC107770672	46050	0	60440.9	55145.4	0	0
A0A1S3Y064	ras-related protein RABF2a-like	LOC107770679	39278	40804.2	30095.6	37461.5	30464.7	31966.8
A0A1S4D2S7	cullin-4-like	LOC107825351	95767	65472.8	18631.7	34685	74266.2	21871.6
A0A1S3Y081	soluble starch synthase 3, chloroplastic/amyloplastic-like	LOC107770809	1779900	2043196	1.70649e+06	1.73236e+06	1.43448e+06	1.8829e+06
A0A1S3Y0B8	ABC transporter B family member 28-like isoform X2	LOC107770825	229280	616090	614365	345744	339107	601313
A0A1S3Y0B9	isoaspartyl peptidase/L-asparaginase 1-like	LOC107770841	158070	216815	121876	133195	119561	151937
A0A1S3Y0D0	uncharacterized protein LOC107770715	LOC107770715	32698	46033.7	38730.1	34499.7	58525.8	673190
A0A1S3Y0E5	Adenylate kinase	LOC107770764	2205400	2.65831e+06	2010753	2178114	2.36014e+06	3.1311e+06
A0A1S4C023	DEAD-box ATP-dependent RNA helicase 56-like isoform X1	LOC107813637	2615100	1.27768e+06	2.09849e+06	1.91981e+06	4.47946e+06	2.66626e+06
A0A1S3Y0G0	early nodulin-like protein 1	LOC107770784	139180	573285	234584	456068	740185	195922
A0A1S3Y0G9	ureidoglycolate hydrolase-like	LOC107770650	307420	272356	230764	272328	312342	255754
A0A1S3YXU7	peptidyl-prolyl cis-trans isomerase CYP71-like	LOC107780916	30241	94749.7	356441	294033	122668	20048.9
A0A1S4AU26	ABC transporter D family member 1-like	LOC107801433	13501	176816	18875.3	14917.6	21373.2	13772.6
A0A1S3ZXA6	uncharacterized protein LOC107791509	LOC107791509	558990	623621	650937	714063	649912	683619
A0A1S3Y0L0	casein kinase I-like isoform X2	LOC107770829	9591.1	8930.1	9292.4	4201.1	9914.3	9543.3
A0A1S3Y0N8	uncharacterized protein LOC107770726	LOC107770726	0	546346	619510	0	429254	601070
A0A1S3Y0Q1	translation initiation factor eIF-2B subunit gamma isoform X2	LOC107770965	80007	65749.3	61448.7	74632.3	63819.3	25682.7
A0A1S4B044	pentatricopeptide repeat-containing protein At1g26460, mitochondrial-like	LOC107803198	757580	0	767224	596911	0	812076
A0A1S3Y0T0	indole-3-acetic acid-amido synthetase GH3.6-like	LOC107770902	805300	725048	840843	927759	533368	522557
A0A1S3Y0T4	elongation factor 2	LOC107770769	18945000	2.04718e+07	1.74339e+07	1.76594e+07	1.87518e+07	1.76025e+07
A0A1S4D110	protein EMBRYO SAC DEVELOPMENT ARREST 3, chloroplastic-like	LOC107824783	104080	48481.4	92370.1	138294	57429.5	126445
A0A1S3Y0U6	lysM domain-containing GPI-anchored protein 1-like	LOC107770883	53467	41887.2	37798.2	43686.2	64228.6	43290.8
A0A1S3Y0V1	S-adenosylmethionine synthase	LOC107770931	12535000	7.7177e+06	1.33713e+07	1.24063e+07	1.0044e+07	9.87106e+06
A0A1S4AXS1	uncharacterized protein LOC107802475	LOC107802475	3592100	3.98532e+06	3.489e+06	3.66241e+06	4.6431e+06	4.08289e+06
A0A1S4BB30	Small nuclear ribonucleoprotein E	LOC107806389	0	54573.9	39483.2	0	63325	47127.4
A0A1S3Y0Y1	60S acidic ribosomal protein P2A-like	LOC107771057	723760	953383	1.51534e+06	721127	1.58252e+06	672039
A0A1S4AD46	ER membrane protein complex subunit 6	LOC107796353	11261	14487.1	12962.9	11224.8	12202.6	9740.7
A0A1S3Y129	uncharacterized protein ycf36-like isoform X2	LOC107770993	62583	31059.6	41216.8	38344	0	39500.6
A0A1S3Y124	60S acidic ribosomal protein P2-1-like	LOC107770879	808080	719936	608310	1.2825e+06	492073	705108
A0A1S4AXS6	hypersensitive-induced response protein 1	LOC107802473	67349	5.14475e+06	39627.8	0	0	29718.4
A0A1S4BHM7	splicing factor 3B subunit 2-like	LOC107808380	69886	53166.2	39341.7	110365	53462.9	25453.8
A0A1S4BKX8	Cellulose synthase	LOC107809423	495870	368630	451803	519543	88963	593151
A0A1S3Y189	uncharacterized protein YMR315W-like	LOC107771052	449050	477943	378871	331688	495123	332320
A0A1S4DM58	Eukaryotic translation initiation factor 3 subunit J	LOC107831054	172090	324306	130650	306083	353740	153994
A0A1S3Y196	molybdate transporter 2-like	LOC107771090	142350	0	65022	137055	70277.8	84002.4
A0A1S3Y197	60S ribosomal protein L32-1-like	LOC107770958	1957500	1.96402e+06	2.23546e+06	2.52733e+06	2.5427e+06	2.3713e+06
A0A1S3Y1B6	Trafficking protein particle complex subunit	LOC107771101	0	26877.4	22845.9	30085.1	14539.7	27176.9
A0A1S3YUR0	50S ribosomal protein L17, chloroplastic-like	LOC107779789	266260	233080	148694	247604	175706	199173
A0A1S3Y1C5	3-ketoacyl-CoA synthase	LOC107771123	25923	21367.3	24787.7	31390.4	31152.8	22813.8
A0A1S3Y1D2	subtilisin-like protease SBT1.7	LOC107770994	105410	251807	202127	75908.9	92605.1	78208.3
A0A1S4AJI4	ATP-dependent Clp protease ATP-binding subunit ClpA homolog CD4B, chloroplastic-like	LOC107798347	33491000	2.35856e+07	3.26166e+07	3.21501e+07	3.20243e+07	3.14348e+07
A0A1S3Y1U4	acyl-CoA-binding domain-containing protein 4 isoform X2	LOC107771151	27044	18663	15724.5	0	20496	181212
A0A1S3Y1H9	ER membrane protein complex subunit 3	LOC107771040	227830	218019	109746	211331	209616	86673.3
A0A1S3Y6Y4	protein BTR1-like	LOC107773061	22901	21096	15155.4	22398.5	0	17943.2
A0A1S3ZDB0	probable ADP-ribosylation factor GTPase-activating protein AGD8	LOC107785612	105070	77291.2	292212	164052	329337	104750
A0A1S3Y266	nucleosome assembly protein 14-like isoform X2	LOC107771225	131210	149302	137888	0	0	0
A0A1S4C1L7	ras-related protein RABA2a	LOC107814193	894920	1.03149e+06	789594	941979	902508	1.47314e+06
A0A1S3Y1S2	ran-binding protein 1 homolog c-like	LOC107771336	409780	357591	328309	290101	0	272510
A0A1S3Y1U8	K(+) efflux antiporter 3, chloroplastic-like	LOC107771276	85718	21325.4	19243.3	117316	59027	17154.6
A0A1S3Y1V1	50S ribosomal protein L18, chloroplastic	LOC107771278	723570	686829	632186	683851	870284	639436
A0A1S4CKA3	mitochondrial import receptor subunit TOM5 homolog	LOC107819803	27547	31005.1	23893.1	30066.7	27680.4	22132.6
A0A1S3YLM2	UDP-glucose 6-dehydrogenase	LOC107777397	3226500	2.67612e+06	2.81467e+06	3.761e+06	2.78822e+06	2539405
A0A1S3Y1X1	uncharacterized protein LOC107771300 isoform X2	LOC107771300	66168	54427.3	29568.9	38469.9	66610.5	99090
A0A1S3Y933	stem-specific protein TSJT1-like	LOC107773590	32207	119818	17794.7	11462.4	4816	0
A0A1S3ZFK9	Ubiquitin carboxyl-terminal hydrolase	LOC107786199	56707	0	66798	58145.1	70156.2	0
A0A1S3Y200	Alpha-1,4 glucan phosphorylase	LOC107771409	92188	95869.3	105036	116999	88858.7	120163
A0A1S3Y4F3	Ribosome-recycling factor, chloroplastic	LOC107772061	121200	118823	59936.5	149330	129904	117044
A0A1S3Y567	bark storage protein A-like	LOC107772062	40550	36780.3	34070.2	0	31801.8	18404.4
A0A1S3Y274	protein SLOW GREEN 1, chloroplastic-like	LOC107771396	184120	266355	129084	47224.4	188274	207468
A0A1S3Y286	ATP-dependent Clp protease proteolytic subunit	LOC107771248	1859400	1.31863e+06	314542	1.40362e+06	1.38517e+06	1.36399e+06
A0A1S3Y296	outer envelope pore protein 24B, chloroplastic-like	LOC107771415	1469900	1.76669e+06	3.78618e+06	3.92511e+06	4.23038e+06	3912128
Q03685	Luminal-binding protein 5	BIP5	5619600	5.97783e+06	6.19652e+06	5.88526e+06	5.38264e+06	6.12981e+06
A0A1S3Y2B4	nuclear pore complex protein NUP50A-like	LOC107771430	137200	154538	136594	155903	187758	98634.3
A0A1S3Y2C8	3-hydroxyisobutyryl-CoA hydrolase-like protein 5	LOC107771448	871870	288454	245906	281491	851730	328140
A0A1S4B8R9	Non-specific serine/threonine protein kinase	LOC107805682	14417	13385.3	10301.4	14653.5	13608.6	9568.1
A0A1S3Y2G8	uncharacterized protein LOC107771531 isoform X4	LOC107771531	25245	33417.2	26167.5	17257	11765.7	28939.8
A0A1S3Y2I1	Fructose-bisphosphate aldolase	LOC107771489	24288000	1.25987e+07	1.32318e+07	2.56204e+07	1.20788e+07	1.5029e+07
A0A1S3Y2J0	villin-4-like	LOC107771362	905510	1.45269e+06	1.0357e+06	1.59588e+06	1796737	1.41099e+06
A0A1S3Y2J3	probable carboxylesterase 2	LOC107771553	93299	102626	108078	110999	82094	105704
A0A1S3Y2J8	succinate dehydrogenase subunit 5, mitochondrial-like isoform X5	LOC107771554	27714	23787.7	25129.4	26699.4	26722.9	31037.8
A0A1S3Y2K8	beta-ureidopropionase-like	LOC107771508	69255	55483	62958.8	0	97624.5	81806
A0A1S3Y2L3	Peptidylprolyl isomerase	LOC107771513	193720	314104	0	0	0	0
Q1W0X2	Mitochondrial import receptor-like protein (Fragment)		6566	164520	0	0	0	178049
A0A1S4BEF8	40S ribosomal protein S12	LOC107807381	1335300	869793	1.67324e+06	3.36049e+06	2.38158e+06	2.57977e+06
A0A1S3Y2M3	protein argonaute 1-like	LOC107771391	282350	175150	244683	383635	286712	249185
A0A1S4CRZ6	60S ribosomal protein L23a-like isoform X2	LOC107821921	565890	510830	435993	527129	577357	1.88279e+06
A0A1S3Y2P0	transportin-1-like	LOC107771529	103540	112131	96631.8	104355	82197.2	109352
A0A1S3Y2R6	Protein disulfide-isomerase	LOC107771549	663550	1.63336e+06	715964	1.45788e+06	1.18517e+06	1068793
A0A1S3Y372	uncharacterized protein LOC107771552 isoform X2	LOC107771552	98934	23458.8	77552.3	87306.8	21843.4	81267.4
A0A1S3Y3D1	Non-lysosomal glucosylceramidase	LOC107771556	0	0	0	87781.8	0	0
A0A1S3Y2V1	Cytochrome b561 and DOMON domain-containing protein	LOC107771464	32951	24216.1	0	24691.8	1188.6	23674.3
Q5MJW7	Lipoxygenase (Fragment)	ACRE44	21983	41241	25248.6	23182.7	72767.4	71142.3
A0A1S3Y2X0	Serine hydroxymethyltransferase	LOC107771579	1502700	1.1034e+06	1.21209e+06	1.51449e+06	1.17795e+06	1.52103e+06
A0A1S3YW96	putative pentatricopeptide repeat-containing protein At5g52630	LOC107780202	0	22846.1	24898.9	0	7937.4	0
A0A1S3Y566	DCC family protein At1g52590, chloroplastic-like	LOC107772407	72641	83262.2	76670.8	0	68387.9	85280.9
A0A6G6ADU9	Carbonic anhydrase		230660	55369.9	165585	186248	66159.8	160022
A0A1S3Y346	T-complex protein 1 subunit alpha	LOC107771644	1301600	1.65106e+06	897055	1.00823e+06	1.59972e+06	724926
A0A1S3Y350	40S ribosomal protein S8	LOC107771534	421170	481232	329067	329978	374152	301530
A0A1S3Y351	RNA-binding protein 2-like	LOC107771652	1137000	972382	1.00069e+06	800051	819701	914964
A0A1S3Y363	heme-binding-like protein At3g10130, chloroplastic isoform X3	LOC107771658	146480	285365	234817	247368	187495	281402
A0A1S3Y354	uncharacterized protein LOC107771709	LOC107771709	0	37223.3	29836.8	23701.8	132164	183170
A0A1S3Y362	Threonine synthase	LOC107771544	50097	87655.9	148522	0	0	130061
A0A1S3Y367	Phosphoribosylformylglycinamidine synthase	LOC107771670	3137600	2.13264e+06	2.87006e+06	3.21347e+06	2.19764e+06	3.16306e+06
A0A1S3Y381	stress protein DDR48-like	LOC107771681	5786200	8.98575e+06	8.45149e+06	1.03106e+07	9.28207e+06	7.43927e+06
A0A1S3Y388	Nucleoside diphosphate kinase	LOC107771678	2980200	2.33646e+06	2.72966e+06	2.67045e+06	2.02127e+06	1.79421e+06
A0A1S3Y3A2	eukaryotic translation initiation factor-like	LOC107771688	553810	161053	485362	394630	589914	367302
A0A1S3Y3C4	5-methylthioadenosine/S-adenosylhomocysteine nucleosidase 2-like	LOC107771706	685770	521849	237910	944969	261013	1233261
A0A1S3Y3D4	ER lumen protein-retaining receptor-like	LOC107771715	0	35163.1	25692.4	23121.3	26834.1	0
A0A1S3Y3D5	uncharacterized protein LOC107771592	LOC107771592	146950	213034	241994	129499	216760	179509
A0A1S3Y3E2	pentatricopeptide repeat-containing protein MRL1, chloroplastic-like	LOC107771716	922000	911845	1.13456e+06	980085	807465	318816
A0A1S3Y3H4	uncharacterized protein LOC107771755	LOC107771755	830130	1.02089e+06	1.05794e+06	1.14869e+06	861099	993167
Q6E2S8	DNA-directed RNA polymerase (Fragment)	RPB2	35966	31894.3	32067.7	34299	31728.4	30228.2
A0A1S3Y3J6	binding partner of ACD11 1-like	LOC107771769	169320	461311	279193	326947	191772	49611.4
A0A1S3Y3L0	GDSL esterase/lipase 5-like isoform X1	LOC107771790	188820	183121	171842	161186	184960	89192.7
A0A1S4A7C4	ras-related protein RABB1b-like	LOC107794510	282030	506390	0	195585	241564	625213
A0A1S4BNZ2	ferredoxin-2-like isoform X2	LOC107810328	1349400	1.59702e+06	1.5022e+06	1.12054e+06	2.08354e+06	2.08707e+06
A0A1S3Y3N2	Histone acetyltransferase	LOC107771873	55304	68930.1	51958.9	146893	93630.3	75206.7
A0A1S3Y3Q6	probable membrane metalloprotease ARASP2, chloroplastic	LOC107771905	472030	429262	546164	475991	580270	469161
A0A1S4A9V4	Beta-galactosidase	LOC107795322	31456	2292259	30450.4	28943.6	20478.8	27807.3
A0A1S3Y3U0	Histone H2A	LOC107771868	12583000	1.11439e+07	9.8327e+06	95672.2	1.1102e+07	91569.4
A0A1S3Y3V0	3(2),5-bisphosphate nucleotidase	LOC107771952	109850	118174	96533.7	25114.6	38105.5	58505.5
A2Q0R1	Uncharacterized protein WAKL1	WAKL1	25310	19718.7	0	0	0	0
A0A1S4A6K0	60S ribosomal protein L31-like	LOC107794303	2341500	2.10426e+06	2.04633e+06	2.65776e+06	2.78019e+06	1.90867e+06
A0A1S3Y3V8	uncharacterized protein At2g39795, mitochondrial-like	LOC107771895	49701	53017.5	40631.5	49195.2	49533	51779
A0A1S3Y3W0	thylakoid lumenal 16.5 kDa protein, chloroplastic-like	LOC107771896	91093	114152	1496238	1.3512e+06	1.04956e+06	94310
A0A1S3Y3W7	methyl-CpG-binding domain-containing protein 11-like	LOC107771897	64480	78039	62456.5	70561.7	70218.2	53236.7
A0A1S3Y3Y8	protein TIC 55, chloroplastic-like	LOC107771918	1070000	759244	1.09898e+06	1.08604e+06	804105	1.53795e+06
A0A1S3Y3Z1	thioredoxin H-type 2	LOC107771931	115480	123840	96198.1	109003	128322	101042
A0A1S3Y407	isoamylase 3, chloroplastic isoform X2	LOC107771936	153520	80781	241519	354518	138734	569760
A0A1S3Y460	uncharacterized protein LOC107771956	LOC107771956	13682	91213.8	87970.9	94941.2	91148.7	17396.8
A0A1S3Y462	Oxoglutarate dehydrogenase (succinyl-transferring)	LOC107772051	549610	688882	509117	328954	508621	274025
A0A1S4DEG5	Squalene monooxygenase	LOC107828762	56933	0	64693.4	0	4489.2	4561.6
A0A1S3Y7Q4	endoplasmic reticulum metallopeptidase 1-like	LOC107773272	73798	72123.5	70078.2	0	47565.1	95594
A0A1S3Y478	Coatomer subunit alpha	LOC107771989	285670	251482	285834	266144	320553	263441
A0A1S3Y491	auxin-induced protein PCNT115-like	LOC107772005	76150	93637.4	88955.5	68917.5	0	102712
A0A1S3Y492	protein transport protein Sec61 subunit gamma-1	LOC107771767	95333	89700.4	75891.5	85181.4	103161	54586
A0A1S4APD0	Asparagine--tRNA ligase	LOC107799901	108960	112434	94439.3	93353.3	115983	93369.9
Q41230	CBP20 (Fragment)	CBP20	1929700	2.20292e+06	1.12637e+06	718342	1701671	1.38732e+06
A0A1S3Y4L8	Thioredoxin reductase	LOC107772125	1377400	891882	421933	777477	1.08653e+06	1.52623e+06
A0A1S3Y4M9	protein WVD2-like 5	LOC107771882	83432	9371.2	65227.2	84608.1	0	0
Q8H0H9	Serine protease-like protein	A43	902900	812000	910449	905133	772008	1.08566e+06
A0A1S4CMW6	ATPase family AAA domain-containing protein 1-like	LOC107820760	0	9252.7	14906.8	62193.2	75496.7	81907.7
A0A1S3Y4V1	guanine nucleotide-binding protein subunit beta-like protein	LOC107772203	1519800	1.16519e+06	1.56993e+06	1.49146e+06	1.10872e+06	2116263
A0A1S3Y4W7	thioredoxin-like protein AAED1, chloroplastic	LOC107772237	239390	278913	275483	267455	267745	277232
A0A1S3Y4Y6	calnexin homolog 1-like	LOC107772248	7213.9	9041	7140.5	6894.4	12962.9	0
A0A1S3Y509	nudix hydrolase 20, chloroplastic-like	LOC107772272	189050	195804	205392	196977	45215.4	211051
A0A1S3Y516	Serine/threonine-protein phosphatase	LOC107772361	0	0	9911.3	9635.3	10395.2	10120.2
A0A1S4ASP3	RuvB-like helicase	LOC107800852	89844	61246.7	60330.7	75570.1	62163.3	47798.7
A0A1S3Y542	Acetyltransferase component of pyruvate dehydrogenase complex	LOC107772318	95568	67006.1	88613.8	39369.9	65360.5	107493
A0A1S3Y577	Imidazole glycerol phosphate synthase hisHF	LOC107772419	472350	649061	553816	603484	271162	668732
A0A1S3Y5C2	uncharacterized protein LOC107772121	LOC107772121	16783	18470.2	34394.7	19416.2	20582	40542.4
A0A1S3Y5G3	fatty-acid-binding protein 1-like isoform X1	LOC107772157	318450	193406	265081	241400	141785	331679
A0A1S3Y5H2	aspartyl protease family protein 2-like	LOC107772515	406120	321320	372432	353433	370597	250966
A0A1S3Y5J0	vignain-like	LOC107772536	15477	26259.5	0	9557.2	41956.4	0
A0A1S3Y5J4	Mannose-6-phosphate isomerase	LOC107772367	0	165148	0	0	190740	0
A0A1S4AA05	uncharacterized protein At2g39795, mitochondrial-like	LOC107795314	21316	29074.8	18554.9	13011.4	21820.5	21994.3
A0A1S4AEX4	Germin-like protein	LOC107796881	140840	0	4745.6	0	6115.3	0
A0A1S3Y5P8	serpin-ZX-like	LOC107772383	805880	1.25024e+06	441199	672651	330942	747378
A0A1S3Y5Q3	UDP-D-apiose/UDP-D-xylose synthase 2	LOC107772423	21840	0	179059	231520	0	0
A0A1S3Y5V8	60S acidic ribosomal protein P0	LOC107772468	2115400	2.16888e+06	2.12073e+06	2.27435e+06	1.63757e+06	1.96652e+06
A0A1S3Y5X6	mitochondrial import inner membrane translocase subunit TIM23-2-like	LOC107772319	67512	47879.2	70754.4	75027.5	59404.2	61246.1
A0A1S3ZGD3	SKP1-like protein	LOC107786549	44094	32446.3	46345.8	64679	30066.8	52514.5
A0A1S3Y5Z1	Ferredoxin--NADP reductase, chloroplastic	LOC107772606	36007000	3.51631e+07	3.94064e+07	3.50474e+07	2.48181e+07	3.92872e+07
A0A1S3Y611	Methenyltetrahydrofolate cyclohydrolase	LOC107772526	14901	13552.9	41869.8	47824.3	48117.9	14926.1
A0A1S3Y635	BAHD acyltransferase DCR-like	LOC107772760	0	394835	401595	459928	521143	326569
A0A1S3Y654	Glutathione transferase	LOC107772392	13559	0	0	0	6514.5	0
A0A1S3Y6A6	Glucosamine 6-phosphate N-acetyltransferase	LOC107772640	48366	43321	46299.3	44814.4	54511	45665.3
A0A1S3Y6C2	chaperone protein DnaJ-like	LOC107772764	115670	149731	95018.5	159506	121762	0
A0A1S3Y6D9	elongation factor G-1, chloroplastic-like	LOC107772698	0	97369.2	92752.2	84642.9	106438	120893
A0A1S3Y6G2	Chlorophyll a-b binding protein, chloroplastic	LOC107772842	53925	87690.5	52337	64662.6	46088.1	46436.1
A0A1S4DDC2	uncharacterized protein LOC107828422	LOC107828422	186740	181267	0	0	202701	150654
A0A1S3Y6I9	defensin J1-2-like	LOC107772553	43966	53453.2	74591.5	58585.4	59256.3	78994.6
A0A1S3Y6J1	syntaxin-71-like	LOC107772775	63274	78259	52382.5	60834.6	49863.2	52513.4
A0A1S3Y6K5	DENN domain and WD repeat-containing protein SCD1-like isoform X3	LOC107772888	0	18712.2	12090.6	13256	13781.7	0
A0A1S3Y6L1	Dynamin GTPase	LOC107772803	1380300	1.43677e+06	1330360	1.08839e+06	1.2979e+06	1.42105e+06
A0A1S3Y6L6	proteinase inhibitor PSI-1.2-like	LOC107772591	70137	131884	80286.6	85325.8	80746.5	64503.2
Q9FSF0	Malate dehydrogenase	MD1	1081700	1.03141e+06	992296	1088801	899538	530631
A0A1S3ZYY3	protein FLX-like 2	LOC107791940	91811	53544.3	67641	106699	59978.8	50276
A0A1S3Y6U9	glutamyl-tRNA(Gln) amidotransferase subunit C, chloroplastic/mitochondrial-like	LOC107773008	228040	123536	132753	43224.4	70468.1	24797.9
A0A1S3Y6V9	uncharacterized protein LOC107773017	LOC107773017	16619	6152.3	25626.7	5988.9	28142.5	15197.1
A0A1S3Y6Y6	PITH domain-containing protein At3g04780	LOC107772749	43069	47331.4	42565.3	40317.9	32803	0
A0A1S3Y716	NADH dehydrogenase [ubiquinone] 1 alpha subcomplex subunit 6-like	LOC107773085	83647	67497.3	66273.4	80478.1	238078	69426.9
Q006P9	Malic enzyme		446970	299253	412653	293961	532645	431979
A0A1S3Y739	12-oxophytodienoate reductase 3	LOC107773112	51630	133382	124737	20398	54669.3	66007.3
A0A1S3Y772	pathogen-related protein-like	LOC107772875	104050	46339.5	26644.6	11297.5	0	10527.7
A0A1S3Y7G2	uncharacterized protein LOC107773170 isoform X3	LOC107773170	83633	109114	4078.8	0	90750.8	35086.7
A0A1S3Y789	Galactinol--sucrose galactosyltransferase	LOC107773108	27769	27102.6	16003.5	24275.1	22345.7	25888.4
A0A1S4DAK3	CCR4-NOT transcription complex subunit 10-like	LOC107827744	40178	38037.1	39275	40274.9	53535.1	37223.4
A0A1S4AGL0	Delta-1-pyrroline-5-carboxylate synthase	LOC107797411	419460	505164	344664	363108	527496	707895
A0A1S3Y7B0	GDSL esterase/lipase At1g29670-like	LOC107773215	83803	69587.9	62059.2	69062.8	71264	45022.7
A0A1S3Y7B8	mannose-1-phosphate guanyltransferase alpha-B-like	LOC107773227	1151400	994754	625454	692287	967747	572270
A0A1S3Y7C7	plastidal glycolate/glycerate translocator 1, chloroplastic-like	LOC107773236	219710	247408	261776	257545	255394	295326
A0A1S3Y7E0	Transcription initiation factor IIF subunit alpha	LOC107772970	35680	38088.4	38960.6	26028.8	0	0
A0A1S3Y7H5	sodium/pyruvate cotransporter BASS2, chloroplastic-like	LOC107773306	0	24443.4	0	0	27728.6	30680.6
A0A1S3Y7I8	Phosphoribulokinase	LOC107773234	59487000	6.58226e+07	7.49716e+07	6.12544e+07	6.10441e+07	7.60616e+07
A0A1S3Y7L4	probable mannitol dehydrogenase	LOC107773242	512010	219779	487475	270967	163367	256606
A0A1S4B5L9	ADP-ribosylation factor-like protein 5	LOC107804726	151120	84498.1	107482	245822	173240	118028
A0A1S3Y7M2	protein decapping 5-like	LOC107773273	288280	136639	308325	136922	335059	141044
A0A1S4CU43	ABC transporter F family member 4-like	LOC107822600	27543	25756.8	20407.7	18488.6	28389.1	18377.8
A0A1S4CPS7	Signal recognition particle receptor subunit beta	LOC107821326	371340	0	271561	274048	175947	311805
A0A1S3Y7P7	Catechol oxidase	LOC107773093	4224.9	19977.4	28547	7825.5	40392.2	8515.4
A0A1S3Y7Q1	protein SPIRAL1-like 1	LOC107773311	250150	233520	362789	358562	321527	206041
A0A1S3Y7Q5	uncharacterized protein LOC107773393 isoform X2	LOC107773393	176250	81682.8	139212	155196	74765	169356
A0A1S3Y7S1	uncharacterized protein LOC107773338	LOC107773338	79419	77931.1	55728.3	65672.1	0	0
A0A1S3Y7S4	heterogeneous nuclear ribonucleoprotein R	LOC107773309	450740	215568	251041	260657	305335	315952
A0A1S3Y7T6	3-phosphoshikimate 1-carboxyvinyltransferase, chloroplastic-like	LOC107773355	77962	0	0	0	1489.3	37894.8
A0A1S3Y7T8	sorbitol dehydrogenase	LOC107773322	707440	980929	1.02246e+06	430913	628308	1.57987e+06
A0A1S3Y7X2	succinate dehydrogenase subunit 5, mitochondrial-like	LOC107773166	21746	31204.1	175724	22481.4	29046.2	265653
A0A1S4DR56	LIMR family protein At5g01460	LOC107832552	142810	0	114336	91608.8	133780	107611
A0A1S3Y808	hypersensitive-induced response protein 4-like	LOC107773216	189730	220313	169416	152903	68026.7	376625
A0A1S3Y811	AP-1 complex subunit gamma	LOC107773525	45635	282191	192150	125240	82694.9	234553
A0A1S3Y820	Chlorophyll a-b binding protein, chloroplastic	LOC107773232	16944000	0	0	0	0	0
A0A1S3Y838	2-methyl-6-phytyl-1,4-hydroquinone methyltransferase, chloroplastic-like	LOC107773365	3798600	4.71355e+06	4.97705e+06	4.8715e+06	4.73541e+06	4.37387e+06
A0A1S3Y851	Transmembrane 9 superfamily member	LOC107773219	889700	481379	559133	1.09566e+06	840996	446279
A0A1S3Y881	protein PTST, chloroplastic-like isoform X1	LOC107773624	17187	169086	184760	157346	438634	53684.6
A0A1S3Y890	Homoserine kinase	LOC107773282	168980	0	0	190978	217115	0
A0A1S3Y892	Pyruvate kinase	LOC107773422	2272800	1.41541e+06	1.0262e+06	1.24575e+06	1.01859e+06	887680
A0A1S3ZCU7	protein ECERIFERUM 1-like	LOC107785373	94447	70400.6	86163.6	153661	58929.5	109778
A0A1S3Y8A7	protein disulfide isomerase-like 2-3	LOC107773445	1825900	0	1.43781e+06	1.58769e+06	0	1.60144e+06
A0A1S3Y8Z8	photosynthetic NDH subunit of lumenal location 2, chloroplastic-like isoform X2	LOC107773657	379420	1.20038e+06	730419	973911	1.01761e+06	1.21933e+06
A0A1S3Y8F0	Methyltransferase	LOC107773510	20175	13947.7	47568.9	20086.8	79013.8	0
A0A1S4AQP3	50S ribosomal protein L18-like	LOC107800177	54353	0	85636.9	95301.6	0	81793.8
A0A1S3Y8H2	Methyltransferase	LOC107773448	3633	19932.4	22828.7	27194.9	19008.6	0
A0A1S3Y8H3	Methionine S-methyltransferase	LOC107773392	253760	79354.5	240821	292988	262882	177939
A0A1S3YCZ9	EKC/KEOPS complex subunit TPRKB-like	LOC107774750	121000	30984.1	157983	30028.8	98114.1	136465
A0A1S3Y8J6	Phosphomannomutase	LOC107773479	50342	41899.8	48000.5	50767.7	43340.5	48065.2
A0A1S3Y8L1	acetyl-coenzyme A synthetase, chloroplastic/glyoxysomal-like isoform X1	LOC107773513	543140	763454	292313	368759	611989	208231
A0A1S3Y9I5	enoyl-CoA delta isomerase 2, peroxisomal-like	LOC107773756	41634	31954	36579.1	34397.3	34458.9	12946.4
A0A1S3Y8Q8	Tubulin alpha chain	LOC107773558	1976800	2.48141e+06	1.25151e+06	1.05563e+06	474172	1.623e+06
A0A1S3Y8R3	8-hydroxygeraniol dehydrogenase-like	LOC107773552	1781600	1649178	1.68041e+06	1953392	1.87437e+06	1.8025e+06
A0A1S3Y8S6	methionine aminopeptidase 1D, chloroplastic/mitochondrial-like	LOC107773518	187040	173883	169618	0	157381	206860
A0A1S3Y8T0	peroxisomal membrane protein 11D-like	LOC107773514	42149	38310.4	52265.2	45653.9	23854.8	48266.5
A0A1S3Y8U8	uncharacterized protein LOC107773848	LOC107773848	113450	0	93551.8	86955.6	96469.7	125737
A0A1S3Y8V8	glutathione S-transferase DHAR3, chloroplastic	LOC107773610	3377400	3.55088e+06	3.18929e+06	2.0741e+06	3.34199e+06	4.41567e+06
A0A1S3Y927	Malate dehydrogenase	LOC107773752	64376	65504.2	57264.8	88852.7	67843.2	26684.7
A0A1S4D915	target of Myb protein 1-like	LOC107827293	999960	164698	825872	92535.3	145466	139440
A0A1S3Y944	calnexin homolog 1-like	LOC107773601	104240	189227	173227	187108	173332	161460
A0A1S3Y958	ribonuclease P protein subunit p25-like protein	LOC107773675	144950	154716	111010	132581	129457	120373
A0A1S3Y974	Chlorophyll a-b binding protein, chloroplastic	LOC107773808	29516000	2.9013e+07	2.71338e+07	2.75492e+07	2.62492e+07	2.90725e+07
A0A1S3Y976	lysosomal Pro-X carboxypeptidase-like	LOC107773688	30586	144704	85008.2	32467.5	17547.7	187903
A0A1S3Y984	Peptidyl-prolyl cis-trans isomerase	LOC107773697	41033	46030.6	47164.6	46425.8	50115.5	45799.1
A0A1S3Y9C6	uncharacterized protein LOC107773869 isoform X1	LOC107773869	53175	46666.3	0	51081	0	63319.8
A0A1S3Y9D0	signal recognition particle 54 kDa protein, chloroplastic	LOC107773874	2458800	2.32913e+06	2.40569e+06	2.81532e+06	2005676	2.4976e+06
A0A1S3Y9E9	Aspartate aminotransferase	LOC107773771	91987	59694.5	74010.3	108215	78729.4	85213.5
A0A1S3Y9F0	importin-5-like	LOC107773903	2448000	1.62404e+06	1.89966e+06	2.2679e+06	2.06439e+06	2.20673e+06
A0A1S3YA66	uncharacterized protein LOC107773970 isoform X2	LOC107773970	53060	53031.1	65619.4	60344.3	54564.9	68804.3
A0A1S3Y9H8	116 kDa U5 small nuclear ribonucleoprotein component-like	LOC107773820	285580	200497	68257.6	212969	341986	130150
A0A1S3Y9I1	protein tas-like	LOC107773751	936290	815781	838973	808610	981141	754478
A0A1S3Y9J1	nitrogen regulatory protein P-II homolog	LOC107773996	0	112948	112213	124350	143207	131090
A0A1S3Y9J3	probable glycosyltransferase At5g03795	LOC107773836	0	34669.8	26154.3	0	0	25254.7
A0A1S3Y9M0	diacylglycerol kinase	LOC107773804	20945	59902.9	17836.2	26140.4	2323.8	51659.6
A0A1S3Y9P0	14 kDa zinc-binding protein-like	LOC107773830	793780	154685	175046	690362	588297	175793
A0A1S3Y9R3	putative late blight resistance protein homolog R1A-10	LOC107773811	27858	22515.2	19896.3	20927.3	0	14894
A0A1S3Y9R7	uncharacterized protein LOC107773917 isoform X2	LOC107773917	36935	34056.1	36500.2	43621.7	0	52360.8
A0A1S4C049	Cytosolic Fe-S cluster assembly factor NBP35	LOC107813737	15448	336916	375222	0	3023.5	405922
A0A1S3Y9S7	uncharacterized protein LOC107773927	LOC107773927	22005	15382.6	12323.1	19244.2	22374.4	18721.8
A0A1S3Y9T1	uncharacterized protein At5g39570-like	LOC107774073	777790	1.02841e+06	873129	880501	1.08026e+06	897656
A0A1S3Y9T9	TATA-binding protein-associated factor 2N-like	LOC107773937	33842	22231.3	0	0	25994.7	0
A0A1S3Y9V2	protein TOC75-3, chloroplastic-like	LOC107774050	3152100	3437760	3132881	3.51867e+06	2.2997e+06	3557777
A0A1S3Y9V3	Selenoprotein O	LOC107773845	195020	256080	321931	329425	180786	392264
A0A1S3YB98	probable LRR receptor-like serine/threonine-protein kinase At1g56140	LOC107774387	13579	12377.7	7008.4	4870.5	4350.8	3994.1
A0A1S3YA15	probable inactive receptor kinase At2g26730	LOC107773926	158490	133193	175208	59581.5	174078	60249.6
A0A1S3YA34	importin-5-like	LOC107773943	150340	150286	146480	182839	125616	177397
A0A1S3ZSH0	uncharacterized protein LOC107789946	LOC107789946	0	89666.9	0	60366.8	59957	70323.9
A0A1S3YA59	uncharacterized methyltransferase At2g41040, chloroplastic-like	LOC107773976	294660	322923	210618	17081.9	199685	70061.7
A0A1S4CAX7	protein NRT1/ PTR FAMILY 4.5-like isoform X2	LOC107817033	21762	31338.2	25882.4	25271.2	28582.9	22537.3
A0A1S3YA83	GTP-binding protein At2g22870	LOC107774204	25854	31035.5	24542.1	0	0	103946
A0A1S3YA89	uncharacterized protein LOC107774005	LOC107774005	756540	944868	793475	957991	825240	921213
A0A1S3YAA8	uncharacterized protein LOC107774004	LOC107774004	34511	63596.9	51553.6	61309.7	0	65065
A0A1S3YAB0	eukaryotic peptide chain release factor subunit 1-3	LOC107774018	13975	3009.8	60255.9	55861.1	10904.6	79988.9
A0A1S3YAB5	GDSL esterase/lipase At1g29670-like	LOC107774023	53563	0	0	0	56514.4	0
A0A1S4CRA1	Ribosomal protein L37	LOC107821679	22156	207755	242196	262049	221553	233580
A0A1S3YAF7	uncharacterized protein LOC107774054	LOC107774054	59140	0	71007.1	79192.2	89834.6	74841.7
A0A1S4AL89	Protein-serine/threonine kinase	LOC107798697	37200	36983.4	30616.2	31889	26784.8	29998.2
A0A1S4DGY7	60S ribosomal protein L18-2-like	LOC107829591	397920	361508	196142	252559	386961	343236
A0A1S3YAN1	Dolichyl-diphosphooligosaccharide--protein glycosyltransferase subunit 2	LOC107774288	108220	93833.3	49971.6	86723.2	66275.6	38813.8
A0A1S3YAN6	COBW domain-containing protein 1-like	LOC107774293	311830	14282.9	0	302346	278501	0
A0A1S3ZBX4	dicarboxylate transporter 1, chloroplastic-like	LOC107785134	1801600	1.80597e+06	1.78635e+06	1.91705e+06	1.99811e+06	1.97713e+06
A0A1S3ZSI3	nuclear transport factor 2-like	LOC107789942	37210	26652.2	36383	43751.7	39983.9	22458.8
D3W9H8	Geranylgeranyl diphosphate synthase	GGPPS1	548060	321174	253275	433125	550798	330650
A0A1S3ZAT9	AP-4 complex subunit mu-like	LOC107784896	139730	29329.3	152262	153579	186485	515656
A0A1S3YAR9	IAA-amino acid hydrolase ILR1-like 4	LOC107774327	229100	259526	222394	383522	324704	131842
A0A1S4DG73	quinone oxidoreductase-like protein 2 homolog	LOC107829416	489450	225434	363547	343942	214925	206959
A0A1S3YBJ7	ubiquitin fusion degradation protein 1 homolog isoform X3	LOC107774380	101170	137152	207211	300063	156658	81553.8
A0A1S3ZUI2	Acyl-[acyl-carrier-protein] desaturase	LOC107790638	737370	1.05208e+06	1.2032e+06	589253	1.23276e+06	336545
A0A1S3YAU9	Chlorophyll a-b binding protein, chloroplastic	LOC107774251	4682300	5.12255e+06	4.25531e+06	4.03036e+06	5.82093e+06	4.69836e+06
A0A1S3YAW9	Tubulin-specific chaperone A	LOC107774275	186250	146358	117196	65539	266896	129365
A0A1S3ZLZ9	COP9 signalosome complex subunit 1-like	LOC107788242	144290	134199	124373	157264	194226	148199
A0A1S3YAY2	1-aminocyclopropane-1-carboxylate oxidase-like	LOC107774406	409020	288266	223870	470503	444999	353920
A0A1S3YQV5	chaperone protein ClpD, chloroplastic-like isoform X2	LOC107778731	42317	50783.5	31280.3	29423.7	31337.4	36648.3
A0A1S3YAZ3	inactive protein RESTRICTED TEV MOVEMENT 2-like	LOC107774217	19232	21914	19778	19758.1	23830.7	14082.2
A0A1S4CPM3	Beta-adaptin-like protein	LOC107821274	240280	156748	220281	269492	179238	273383
A0A1S3YB08	early nodulin-like protein 2	LOC107774426	1153300	727687	1.32308e+06	1.0287e+06	1.337e+06	1.37792e+06
A0A1S3ZBG0	Ribulose bisphosphate carboxylase small subunit, chloroplastic	LOC107785040	166290	2.59861e+07	1.49189e+06	1.37372e+06	6.30762e+06	3.07049e+07
A0A1S3YB24	uncharacterized RNA methyltransferase BH0687	LOC107774326	78178	50843.2	121260	59345	32946.3	64139.3
A0A1S3YB26	protein SIEVE ELEMENT OCCLUSION B-like	LOC107774440	148340	328610	229055	416621	317250	243168
A0A1S3Z3S1	ATP-dependent Clp protease proteolytic subunit	LOC107782632	839880	1.93479e+06	1.53687e+06	1678709	1.67025e+06	953828
A0A1S3YB43	uncharacterized protein LOC107774459	LOC107774459	150000	164331	128689	127513	146555	143056
A0A1S4C3X3	1-aminocyclopropane-1-carboxylate oxidase homolog 11-like	LOC107814880	367700	83599.5	311509	299796	169858	390096
A0A1S4CWT8	protein VAC14 homolog	LOC107823476	101370	75939.1	102084	63544.6	20807.9	22505.3
A0A1S3ZU32	28 kDa ribonucleoprotein, chloroplastic	LOC107790472	1229500	3.40424e+06	1.59055e+06	2271586	2.40062e+06	2.34896e+06
A0A1S4BU19	Golgi to ER traffic protein 4 homolog	LOC107811839	90155	150454	91801	88004	98405.4	79066.5
A0A1S3YB91	UPF0051 protein ABCI8, chloroplastic-like	LOC107774488	1739400	2.4877e+06	1248078	1.65373e+06	906728	835036
A0A1S3YBA9	uncharacterized protein LOC107774393	LOC107774393	11354	5948.3	0	8283.4	5014.9	0
A0A1S3ZXD5	amino acid permease 6-like	LOC107791403	59437	87818.3	68108	0	64455.7	103783
A0A1S3ZU02	Protein-L-isoaspartate O-methyltransferase	LOC107790471	31806	88202.6	86487	34867.2	69023.2	32103.9
A0A1S3YBI5	epimerase family protein SDR39U1 homolog, chloroplastic-like	LOC107774381	241280	287962	369895	195943	178194	404484
A0A1S3YBI7	Inorganic diphosphatase	LOC107774375	8529900	1.03145e+07	5.44618e+06	7.51288e+06	9.76153e+06	7663670
A0A1S3YBJ9	U6 snRNA-associated Sm-like protein LSm8	LOC107774569	130260	150569	108200	130195	100532	10863.3
A0A1S3YBM6	ACT domain-containing protein DS12, chloroplastic-like	LOC107774407	7663600	9.68004e+06	9603438	1.02655e+07	7381782	8.48042e+06
A0A1S3YBQ2	respiratory burst oxidase homolog protein C	LOC107774415	83995	107082	101650	13761.8	143505	0
A0A1S3YY83	la-related protein 6A-like	LOC107780928	72661	123002	67494.5	17549.8	72575.9	93066.9
A0A1S4BXV5	RNA-binding protein 42-like isoform X2	LOC107813043	15359	13433.5	14044.5	15715.2	15357.4	13010.6
A0A1S3YBU4	Riboflavin kinase	LOC107774534	13779	0	0	14901.3	0	0
A7XAQ5	Glucose-1-phosphate adenylyltransferase	AGP	8497600	1.04768e+07	1.04884e+07	1.11562e+07	9.17978e+06	1.03762e+07
A0A1S3YBV7	T-complex protein 1 subunit gamma	LOC107774646	755920	397715	578329	774293	480605	650805
A0A1S3YBX4	protein FAM136A-like	LOC107774636	49697	54684.9	44019.8	0	64620.8	48223.4
A0A1S3ZD92	beta-glucosidase BoGH3B-like	LOC107785592	154390	385880	278242	76630.7	289269	144804
A0A1S4B1F8	uncharacterized protein LOC107803533	LOC107803533	306160	68729	383511	252958	202299	114412
A0A1S3YC29	LOW QUALITY PROTEIN: protein transport protein SEC31 homolog B-like	LOC107774522	914570	1.34471e+06	940036	2.53767e+06	1.18999e+06	1.24841e+06
A0A1S3YC63	aminoacylase-1-like	LOC107774716	539670	492659	135806	531030	491236	143300
A0A1S3YC69	Acyl-[acyl-carrier-protein] desaturase	LOC107774635	156160	139352	191341	143873	147771	134054
A0A1S3YCA3	2-C-methyl-D-erythritol 2,4-cyclodiphosphate synthase	LOC107774746	774910	784276	862920	1500979	976004	1.45036e+06
A0A1S3YCB6	uncharacterized protein LOC107774581	LOC107774581	0	668291	694797	676613	0	703592
A0A1S3YCE5	protein CYPRO4-like	LOC107774751	173080	225414	187712	62593.5	82907	148288
A0A1S3YCF0	23 kDa subunit of oxygen evolving system of photosystem II	LOC107774757	10622000	5.90524e+06	6.67919e+06	5.46806e+06	7.26206e+06	5.3407e+06
A0A1S3YCF2	40S ribosomal protein S12	LOC107774609	2045900	1.0211e+06	405173	446884	1.30157e+06	1.62068e+06
A0A1S3YCI5	heat shock 70 kDa protein, mitochondrial	LOC107774811	590510	206666	431394	403793	383395	0
A0A1S4C8D2	uncharacterized protein LOC107816210	LOC107816210	41016	0	49168	3884.7	28090.9	0
A0A1S4AYD6	very-long-chain 3-oxoacyl-CoA reductase 1-like	LOC107802666	419180	377847	411511	292425	285256	265553
A0A1S3YCR5	delta(1)-pyrroline-2-carboxylate reductase-like	LOC107774685	17004	21682.5	130145	51159.8	124996	112565
A0A1S3YCR6	oxygen-evolving enhancer protein 1, chloroplastic-like	LOC107774864	19305000	2.37437e+07	2.02127e+07	2.17013e+07	2.41713e+07	2.18771e+07
A0A1S3YCS2	UDP-arabinopyranose mutase	LOC107774692	364840	132303	313490	347167	390528	313264
A0A1S3YCT8	branched-chain-amino-acid aminotransferase 2, chloroplastic-like isoform X3	LOC107774808	24100	20974.5	17030.5	8222.1	8635.6	6655.8
A0A1S3YD06	Methylthioribose-1-phosphate isomerase	LOC107774973	322460	281845	292526	415730	316791	554564
A0A1S4CSM4	probable serine/threonine-protein kinase At5g41260	LOC107822115	41174	42794.2	36317.3	37830.1	28695.3	34018.4
A0A1S4DFI2	U2 small nuclear ribonucleoprotein B-like	LOC107829271	73885	70637.3	54809.5	67147.3	86198.2	56062.4
A0A1S3YD39	NADH dehydrogenase [ubiquinone] 1 beta subcomplex subunit 9	LOC107774984	807230	711725	930676	818991	985556	694888
A0A1S3YD59	uncharacterized protein LOC107774797	LOC107774797	131370	130229	130266	161626	127393	132638
A0A1S3YD61	RNA-binding KH domain-containing protein PEPPER-like	LOC107775003	447900	441055	337882	400957	425653	422213
A0A1S3YDK1	Glutamate--tRNA ligase	LOC107774917	0	0	0	0	0	229808
A0A1S3YD74	Peptide-methionine (R)-S-oxide reductase	LOC107774813	413790	208310	450105	332578	124492	480564
A0A1S3YD75	Chlorophyll a-b binding protein, chloroplastic	LOC107774933	4875700	5.27148e+06	4.7955e+06	4.5916e+06	5538372	4.85441e+06
A0A1S3Z159	UDP-glucose 4-epimerase	LOC107781891	282060	168353	185620	73527.6	177105	154647
A0A1S3YD84	Calcium-transporting ATPase	LOC107774818	80830	116404	103540	111890	79190.4	69108.4
A0A1S3YD88	H(+)-exporting diphosphatase	LOC107774827	2345600	1.53428e+06	2.12447e+06	2.23985e+06	2.68673e+06	2.13064e+06
A0A1S4DH96	uncharacterized protein LOC107829787	LOC107829787	193380	441684	381540	399125	617517	492431
A0A1S3YDB6	transcription initiation factor TFIID subunit 15b-like	LOC107775077	266320	223696	164756	285228	282320	201042
A0A1S3YDE5	Coatomer subunit beta	LOC107774878	2862200	2.05503e+06	1532628	2.156e+06	1.79077e+06	1.96983e+06
A0A1S3YKV5	prefoldin subunit 6-like	LOC107777113	484950	192516	169092	166141	227195	223184
A0A1S3YDJ6	2-alkenal reductase (NADP(+)-dependent)-like	LOC107774912	334670	468454	442816	443619	430744	501555
A0A1S3YDK7	kirola-like	LOC107774922	31824	37643.3	41492.8	0	49999.7	26347.4
A0A1S3YDL0	40S ribosomal protein S17-like	LOC107775156	77517	34980.9	95816	88030.6	40665.1	72424.1
A0A1S3YDM5	Chlorophyll a-b binding protein, chloroplastic	LOC107774945	9281	7550.4	108857	120766	163871	170838
A0A1S3YDN4	Divinyl chlorophyllide a 8-vinyl-reductase, chloroplastic	LOC107774957	143640	114152	152515	162578	152966	117840
A0A1S4B8W8	peroxisome biogenesis protein 19-2-like	LOC107805738	0	141530	130711	123326	0	145069
A0A1S3ZMP9	macrophage migration inhibitory factor homolog	LOC107788402	512310	503698	334202	613271	525077	515578
A0A1S3YDS7	synaptotagmin-1-like	LOC107775123	503990	362723	501596	519922	490525	255058
A0A1S3YDT5	uncharacterized protein At2g39795, mitochondrial-like	LOC107775212	81781	99275.4	75760.1	88494.4	93087.9	75764.1
A0A1S4CR54	photosystem I reaction center subunit VI-1, chloroplastic-like	LOC107821676	4416700	4.63395e+06	4.14361e+06	5.18877e+06	3.34314e+06	5.27158e+06
A0A1S3YDV3	Methionine S-methyltransferase	LOC107775022	101860	0	5076.8	91937.4	0	0
A0A1S3YDV6	Ketol-acid reductoisomerase	LOC107775146	163070	74848.8	199226	275543	54551.2	71219.7
A0A1S3YDY7	auxin-induced protein PCNT115-like	LOC107775053	73217	96163.6	88074.1	0	86653.5	100578
A0A1S3YE52	Deoxyuridine 5-triphosphate nucleotidohydrolase	LOC107775275	28746	21155.7	17536	19345.5	14204.9	0
A0A1S3YE60	L-ascorbate peroxidase 3, peroxisomal-like	LOC107775122	3516300	3497355	2.528e+06	3.47321e+06	4.25446e+06	428782
A0A1S3YE85	Mitochondrial-processing peptidase subunit alpha	LOC107775304	223200	251734	0	195237	536602	281833
A0A1S3YE96	thylakoid lumenal 17.9 kDa protein, chloroplastic-like	LOC107775352	0	343682	180869	245740	0	322577
A0A1S3YEB3	Chlorophyll a-b binding protein, chloroplastic	LOC107775375	342570	953216	508571	1.03741e+06	644546	836673
A0A1S4AX09	heme-binding-like protein At3g10130, chloroplastic	LOC107802215	292230	732526	271814	810780	404254	849591
A0A1S3YEC7	Pyrophosphate--fructose 6-phosphate 1-phosphotransferase subunit beta	LOC107775390	2166600	2.41585e+06	1.94808e+06	1.78928e+06	2.27035e+06	1.38765e+06
A0A1S3YED7	uncharacterized protein LOC107775183	LOC107775183	46186	0	0	0	0	59291.9
A0A1S3YEF6	D-amino acid dehydrogenase-like isoform X2	LOC107775405	80101	72180.1	71023.3	70116.3	59752.9	63974.5
A0A1S3Z9Z4	syntaxin-132-like	LOC107784419	92265	108266	81450.1	75318.2	105302	73485.8
A0A1S3YEJ2	CBS domain-containing protein CBSCBSPB5-like	LOC107775348	437850	574259	286713	557730	276357	322046
A0A1S3ZNU2	uncharacterized protein LOC107788744	LOC107788744	16211	4013.3	18776.3	11752.1	0	19027
A0A1S3YEK6	protein LUTEIN DEFICIENT 5, chloroplastic-like	LOC107775451	688800	562958	918616	909791	1.06561e+06	1.02121e+06
A0A1S4CEB3	histone-lysine N-methyltransferase setd3-like	LOC107817921	63876	67951.9	67334.8	75533.2	74704.3	58459.1
A0A1S3YF76	uncharacterized protein LOC107775464 isoform X2	LOC107775464	13467	12887.8	17577.4	18645.3	10088.9	22064
A0A1S3YEM0	protein STRICTOSIDINE SYNTHASE-LIKE 5-like	LOC107775430	267790	15216.1	59174.3	13218.2	178355	15334.2
A0A1S3YEN0	uncharacterized protein LOC107775439	LOC107775439	0	0	0	188347	0	101506
A0A1S4C4J6	Aquaporin TIP1-3t	LOC107814985	7409000	1.07229e+07	5.05792e+06	5.37725e+06	711998	675003
A0A1S3YER8	cysteine proteinase 3-like	LOC107775429	336450	351862	219109	140034	202104	340803
A0A1S4D5T7	AP-2 complex subunit alpha	LOC107826292	355160	214448	187449	401725	555167	396754
A0A1S4DLP6	splicing factor U2af small subunit B-like	LOC107830920	104920	126249	89197.1	111050	0	0
A0A1S3YES5	Inosine-5-monophosphate dehydrogenase	LOC107775294	128250	105742	97815.5	116077	84984.9	120008
A0A1S3YET9	putative leucine-rich repeat-containing protein DDB_G0290503	LOC107775302	393930	199638	279496	194930	176210	213086
A0A1S3YEU4	non-symbiotic hemoglobin 2-like	LOC107775309	1777300	2.14228e+06	1.62562e+06	1.30339e+06	2.73501e+06	1.67189e+06
A0A1S4CT41	RNA helicase	LOC107822276	422650	387242	386179	407254	439483	79374
A0A1S4BA66	thioredoxin-like protein CITRX1, chloroplastic	LOC107806164	112450	121557	112536	118944	140982	75471
A0A1S3YEX0	sedoheptulose-1,7-bisphosphatase, chloroplastic-like	LOC107775549	8012200	9.8582e+06	10507630	9.72928e+06	8.33428e+06	9.92504e+06
A0A1S3YEZ1	uncharacterized protein LOC107775564	LOC107775564	215860	224932	216713	243160	278490	177939
A0A1S3YF09	RING-type E3 ubiquitin transferase	LOC107775515	25726	14440	26683	26354.4	8198.2	15265.6
A0A1S3YF48	SNF1-related protein kinase regulatory subunit beta-1-like	LOC107775402	29281	35565.3	21046.6	27183.7	27781.3	29128.9
A0A1S3YG21	10 kDa chaperonin-like isoform X2	LOC107775642	1030500	1.06318e+06	1.0034e+06	2.64455e+06	212608	255522
A0A1S3YF61	uncharacterized protein LOC107775567	LOC107775567	1040200	769236	1.13234e+06	1.0972e+06	977483	858726
A0A1S3YF68	Glutamine--tRNA ligase	LOC107775454	347030	315717	170568	247819	323557	235028
A0A1S3YF81	4-coumarate--CoA ligase	LOC107775594	118420	131842	35897.8	98818.3	107892	37246.7
A0A1S3ZPV6	39S ribosomal protein L46, mitochondrial-like	LOC107789156	10921	9623.1	9273.2	9035.5	5258.6	16132.7
A0A1S3YF92	flagellar radial spoke protein 5-like isoform X1	LOC107775472	148920	140703	146834	133338	128953	154116
A0A1S3YFB7	Acyl carrier protein	LOC107775639	160710	337251	144004	158483	360643	18485.1
P27608	Phospho-2-dehydro-3-deoxyheptonate aldolase 1, chloroplastic	DHAPS-1	359660	249314	312277	347751	326424	296078
A0A1S3YFI2	importin-5-like	LOC107775544	401170	265328	682870	794175	414392	732790
A0A1S3YFI3	PRA1 family protein	LOC107775554	125210	28780.5	29496.2	89273.5	33526.6	366826
A0A1S3YFI6	Coatomer subunit alpha	LOC107775546	2800400	2776036	2.53477e+06	3.19136e+06	3.05886e+06	2.25075e+06
A0A1S3YFR8	uncharacterized GPI-anchored protein At1g61900-like isoform X2	LOC107775718	237730	264250	187601	232708	69859.2	197890
A0A1S3YFK1	protein TRIGALACTOSYLDIACYLGLYCEROL 4, chloroplastic-like	LOC107775640	1483800	1.09753e+06	599728	950620	806433	979973
A0A1S3YFY7	alpha-glucan water dikinase, chloroplastic isoform X1	LOC107775774	4154100	1.62048e+06	4.57706e+06	4.68507e+06	4.91626e+06	4.96445e+06
A0A1S3YFK6	NHL repeat-containing protein 2	LOC107775778	2352700	2.54101e+06	2382336	2.15068e+06	2.19374e+06	2.23294e+06
A0A1S4D1A8	N-terminal kinase-like protein isoform X2	LOC107824750	54903	53574.7	50311.3	47843.8	39409.4	57303.3
A0A1S3YFM6	IAA-amino acid hydrolase ILR1-like 5	LOC107775743	16322	14188.6	12518.2	11199.2	10987.9	12219.8
A0A3G1E3S8	3-oxoacyl-[acyl-carrier-protein] synthase		2625100	1.69338e+06	2.16915e+06	2.10983e+06	2.06749e+06	1.10266e+06
A0A1S3YFR1	Phospholipase A1	LOC107775710	74364	91359.4	68605.4	79440	62975.2	68068.8
A0A1S3YFR7	Sucrose synthase	LOC107775654	439780	134523	138565	84326.5	37961.1	290039
A0A1S3YFU4	LETM1 and EF-hand domain-containing protein 1, mitochondrial-like	LOC107775562	0	23338.4	13769.6	17069.7	24056.6	24667.4
A0A1S3YFU7	Peptide-methionine (R)-S-oxide reductase	LOC107775816	340480	434561	380923	336284	188618	378970
A0A1S3YFV0	protein PALE CRESS, chloroplastic-like isoform X1	LOC107775741	127390	82876.8	134118	156988	55527.1	97853.5
Q84TU4	RING-type E3 ubiquitin transferase	LOC107799257	24733	20075.9	23549.4	0	0	0
A0A1S4DBM1	DNA ligase	LOC107828011	22944	18723.7	18781.3	17445.4	22937.4	17125.9
A0A1S3YG02	protein MODIFIER OF SNC1 11-like	LOC107775781	20418	18583.4	19091.6	20843.3	20707	15046.6
A0A1S4BPM7	defensin-like protein P322	LOC107810540	951680	1.057e+06	882964	1052047	1.08451e+06	877019
A0A1S3YG08	vesicle-associated membrane protein 711	LOC107775789	94456	140315	116094	66682.5	109926	132130
A0A1S3ZKL1	DNA-directed RNA polymerases I and III subunit RPAC1	LOC107787692	30517	25581.8	21958.4	23506.2	10218.1	21164.8
A0A1S3YG42	Chalcone-flavonone isomerase family protein	LOC107775821	320160	547111	92914.9	204349	144709	212157
A0A1S3YG63	monodehydroascorbate reductase-like	LOC107775678	1603200	1.87248e+06	1584686	1.58473e+06	1.67002e+06	1.89717e+06
A0A1S3YG65	Ribose-5-phosphate isomerase	LOC107775978	6601900	5.69294e+06	6.03681e+06	6.17182e+06	6.48307e+06	5.85575e+06
A0A1S4BK42	subtilisin-like protease SBT1.9	LOC107809145	19916	30009	29164.6	22968.7	31525.5	30285.7
A0A1S3YG86	Phosphoenolpyruvate carboxykinase (ATP)	LOC107776000	0	0	71046.5	0	0	0
A0A1S4BU07	protein IQ-DOMAIN 1-like	LOC107811877	50231	0	0	17696.2	0	11760.8
A0A1S4AE78	protein FLX-like 1	LOC107796708	13687	37774.2	12000.6	47079	42325.6	38448.9
A0A1S3YGA9	glutamine synthetase nodule isozyme-like	LOC107775719	206120	438500	234514	232052	232585	230384
A0A1S3YGB7	probable 6-phosphogluconolactonase 5, chloroplastic	LOC107775966	34265	35168.4	27895	31032.1	74472.6	88885.3
A0A1S3YGD4	Malic enzyme	LOC107775826	282880	1.61734e+06	1.28568e+06	776586	1.33677e+06	863626
A0A1S4CCZ4	Mitochondrial import inner membrane translocase subunit Tim21	LOC107817736	110720	138315	136180	171239	352398	174621
A0A1S3YGL3	Ribokinase	LOC107775815	161690	169579	105744	134628	192196	100563
A0A1S3YGM9	RAN GTPase-activating protein 2-like	LOC107776073	564270	42451.7	1073810	867468	462716	812021
A0A1S3YGN1	protein BOBBER 1-like	LOC107775992	425080	427293	410520	391651	363499	462548
A0A1S3ZTJ6	uncharacterized protein LOC107790333	LOC107790333	32595	39490.8	80711.1	78261.6	83333.6	0
A0A1S3YGP6	Asparagine--tRNA ligase	LOC107776004	626840	698078	719836	441991	343935	736473
A0A1S3YGR1	4-coumarate--CoA ligase	LOC107776019	350680	502116	370360	248976	556933	501345
A0A1S4BPI4	RNA-binding protein 38-like	LOC107810518	3569.5	111471	101134	119528	0	107850
A0A1S3YGX2	kynurenine formamidase-like	LOC107776169	238170	309862	315906	0	287136	272333
A0A1S3YGX8	Sulfiredoxin	LOC107776142	0	17775.8	29974.3	19223.7	18051.1	34308.1
A0A1S4BVX9	protein RCC2-like	LOC107812446	8411.3	6039.1	6571	0	5197.9	4763.1
A0A1S4BLI0	Serine/threonine-protein phosphatase	LOC107809565	340010	94395.7	314087	342755	263421	155476
A0A1S3YGZ0	heat shock 70 kDa protein, mitochondrial	LOC107775921	2448100	3.16733e+06	2.22778e+06	2.24568e+06	1.99203e+06	1.91431e+06
A0A1S3YGZ3	apoptosis-inducing factor homolog B-like	LOC107776152	32864	29412.1	28768.4	31321.8	18704.7	9052.2
A0A1S3YH29	plasma membrane-associated cation-binding protein 1-like	LOC107776048	1149800	1679761	1.3624e+06	1.17674e+06	980304	864742
A0A1S3YH38	serine-threonine kinase receptor-associated protein-like	LOC107776117	374030	398218	435619	284081	359382	391334
A0A1S3YHL0	Pyruvate, phosphate dikinase	LOC107776231	34914	50190.7	70909.1	36048.7	48727.9	122264
A0A1S3YH85	Methylcrotonoyl-CoA carboxylase	LOC107776091	173450	57602.9	11539.7	131854	0	179918
A0A1S4CVY7	FAD-dependent urate hydroxylase-like	LOC107823278	56329	147479	122422	41339.6	133310	40079
A0A1S4A6T2	photosynthetic NDH subunit of subcomplex B 4, chloroplastic-like	LOC107794348	670980	763873	734786	752988	2.01852e+06	643185
A0A1S3YHI6	GATA type zinc finger protein asd-4-like	LOC107776224	15284000	1.29496e+07	1.39354e+07	1.49791e+07	1.39721e+07	1.30437e+07
A0A1S4ANL0	ATP citrate synthase	LOC107799450	98234	143426	101973	46405.3	62867.4	92162.2
A0A1S3YHM6	multisubstrate pseudouridine synthase 7-like	LOC107776357	57287	0	49271.1	51299.1	27332.9	0
A0A1S3YHP3	RAN GTPase-activating protein 2-like	LOC107776378	0	0	0	108778	0	0
A0A1S3YHS2	protein NAP1-like	LOC107776150	24866	29547.2	11683.2	26604.2	23438.5	19758.1
A0A1S3YIE3	probable serine protease EDA2 isoform X3	LOC107776426	134710	1553.3	37821.4	89526.4	92693.4	0
A0A1S3YIF8	Arginine--tRNA ligase	LOC107776442	312260	294854	118915	321450	373200	97616.8
A0A1S4BFM5	Probable 6-phosphogluconolactonase	LOC107807751	42917	53238.5	47467.8	12762.6	62736.7	17563.8
A0A1S3YHZ1	protein THYLAKOID FORMATION1, chloroplastic	LOC107776485	2926900	7.19947e+06	5.7747e+06	6.13343e+06	1.75247e+06	1.54879e+06
A0A1S3YI10	probable beta-D-xylosidase 7	LOC107776309	131580	136911	126991	135181	117714	131311
A0A1S3YI48	leukotriene A-4 hydrolase homolog isoform X1	LOC107776257	378340	473241	521550	347966	178527	745464
B6ZLB8	Indole-3-acetamide hydrolase	NtAMI1	1030400	792802	677583	777958	734749	512227
A0A1S4DN92	glutamate formimidoyltransferase-like	LOC107831626	11530	70877.2	36585.2	75930.4	78415.2	10180.8
A0A1S3YIC9	NEDD8-activating enzyme E1 regulatory subunit	LOC107776609	192760	137770	86740.8	202465	129836	216017
A0A1S3YIE9	S-formylglutathione hydrolase	LOC107776428	165500	142483	136149	138590	91264.6	126810
A0A1S3YIG1	Phosphopyruvate hydratase	LOC107776643	19287000	1.72783e+07	1.25141e+07	9.11951e+06	1.17909e+07	1.84386e+07
A0A1S3YIH2	probable ATP synthase 24 kDa subunit, mitochondrial	LOC107776369	3859300	3.50469e+06	3.44998e+06	3.79202e+06	3.50529e+06	3.20365e+06
A0A1S3YIH5	Coatomer subunit gamma	LOC107776662	218370	216427	284176	78336.3	176406	38393.6
A0A1S3YII2	Threonylcarbamoyl-AMP synthase	LOC107776382	102130	72585.4	109170	106536	90703.8	14395.2
A0A1S4AUB3	glucan endo-1,3-beta-glucosidase 13-like	LOC107801295	26204	28478.9	21657.1	27089.5	12858.6	23323.7
A0A1S3YIT4	probable 2-carboxy-D-arabinitol-1-phosphatase isoform X1	LOC107776444	453600	156413	394559	427719	256954	357702
A0A1S3YIL4	protein SPIRAL1-like 1	LOC107776489	67901	188096	146217	538903	228835	558048
A0A1S4CYQ8	uncharacterized protein LOC107824057	LOC107824057	56575	65270.6	54855	68661.5	41583.7	68293.3
A0A1S3YJ41	ribonuclease 2-like isoform X2	LOC107776720	161850	124364	26674.9	23553.3	107980	30188.4
A0A1S3YIS4	Glycosyltransferase	LOC107776603	573510	322347	719654	548240	541819	729406
A0A1S3YIU8	Proteasome subunit beta	LOC107776568	684770	709201	592875	631075	778143	601346
A0A1S3YIX1	ultraviolet-B receptor UVR8-like	LOC107776776	642090	657074	336648	356883	408864	638407
A0A1S3YIY4	Ubiquitin carboxyl-terminal hydrolase	LOC107776789	1292300	1.06046e+06	702298	731191	896396	529381
A0A1S3YIY7	putative lipid-binding protein At4g00165	LOC107776669	706320	582386	681586	725059	766744	698715
A0A1S4B5J9	ABC transporter G family member 11-like	LOC107804722	45656	36125.6	42062.9	43938	45549.1	36762.3
A0A1S3YIZ0	Aconitate hydratase	LOC107776610	2208600	2.32756e+06	1984067	1.74884e+06	2.31553e+06	1.74687e+06
A0A1S4B5L4	UDP-arabinopyranose mutase	LOC107804720	1151100	269853	1.15104e+06	0	90195.8	0
A0A1S3YJ19	23 kDa subunit of oxygen evolving system of photosystem II	LOC107776818	252180	174899	336669	291862	178332	121656
A0A1S3YJ85	cysteine-rich receptor-like protein kinase 10 isoform X2	LOC107776700	152640	150579	155578	142624	113113	142581
A0A1S3YJ46	uncharacterized protein LOC107776728	LOC107776728	13645	13116.1	11418.4	6157.8	16517.9	0
A0A1S3YJ56	protein TSS isoform X2	LOC107776855	9431100	1.35204e+07	9.18657e+06	7.19551e+06	1.55248e+07	7389059
A0A1S3YJ63	topless-related protein 3-like	LOC107776850	267100	448198	287441	331892	406640	206108
A0A1S4CZ34	Dirigent protein	LOC107824061	73713	0	1668.3	0	10378.4	0
A0A1S3YJ90	rubredoxin-like	LOC107776709	1487000	1.53533e+06	1.63159e+06	2.08597e+06	1.71738e+06	1.48188e+06
A0A1S3YJA4	cingulin-like	LOC107776777	299600	385115	336416	711514	441891	703371
A0A1S3YJD3	SUMO-activating enzyme subunit 1B-1-like	LOC107776804	75685	45689.1	66060.1	71525.1	78453	54205.5
A0A1S3YJD9	40S ribosomal protein SA	LOC107776807	5525100	5.58873e+06	4.70433e+06	5.27508e+06	4.44184e+06	5.3887e+06
A0A1S4BDN2	Non-specific serine/threonine protein kinase	LOC107807209	0	141876	49460.2	69502.1	0	74845
A0A1S3YZL7	uncharacterized protein LOC107781557	LOC107781557	19699	24975.4	0	18528.6	25282.5	18609
A0A1S3YJI1	guanine deaminase-like	LOC107776708	325570	103090	102549	434722	348224	206373
A0A1S3YJI3	30S ribosomal protein S20, chloroplastic-like	LOC107776799	814050	820588	775856	712056	925191	758703
A0A1S3YJI5	protein OVEREXPRESSOR OF CATIONIC PEROXIDASE 3-like isoform X2	LOC107776842	93356	54295.3	73512	88090	57892.8	20092.1
A0A1S3YJI6	trypsin inhibitor 1-like	LOC107776717	107390	27158.1	12639.5	10568.6	4191.6	0
A0A1S3YJK2	luminal-binding protein 5-like	LOC107776733	486420	1.22227e+06	1.27416e+06	498094	108327	10426.5
A0A1S3YJY8	AP-4 complex subunit epsilon	LOC107776976	34646	42998.4	36375.9	37272.1	82017.1	34479.5
E1APE9	Delta-1-pyrroline-5-carboxylate synthase	P5CS	324330	175412	156184	158073	192666	175196
A0A1S3YJQ5	40S ribosomal protein S8	LOC107776903	1779800	1.97187e+06	1.61572e+06	1.97602e+06	2.36817e+06	1.68438e+06
A0A1S3YJQ8	protein TSS isoform X4	LOC107776855	8367800	5.47436e+06	8.97126e+06	8899400	8.00206e+06	8.19542e+06
A0A1S3YJS7	uncharacterized protein LOC107777040	LOC107777040	868730	857979	899107	851599	230395	236245
A0A1S3YJU7	haloacid dehalogenase-like hydrolase domain-containing protein At2g33255	LOC107776939	452240	504253	266658	172120	308649	1.37505e+06
A0A1S3YKF6	nuclear transport factor 2-like isoform X3	LOC107777066	578810	776410	533549	280867	709922	905796
A0A1S3YKG1	probable serine protease EDA2 isoform X3	LOC107777070	697670	786894	1.05582e+06	561754	1040658	1.02568e+06
A0A1S3YJX7	GDP-mannose 4,6-dehydratase	LOC107776909	160940	72785.5	317534	133257	96320.6	145490
A0A1S3YU20	Calreticulin	LOC107779794	196660	712469	596514	221558	249247	14144.2
A0A1S3YK07	Glutathione reductase	LOC107777100	792650	414567	625454	619096	879642	1.02878e+06
A0A1S3YK17	3-hydroxyisobutyryl-CoA hydrolase 1-like isoform X1	LOC107777109	97125	13427.2	30334.1	23678.2	15133.7	36535.5
A0A1S3YK19	Fumarate hydratase	LOC107776946	5414800	1.13649e+06	1.54678e+06	1.79665e+06	928918	1.53386e+06
A0A1S3YK35	40S ribosomal protein S4	LOC107776966	6975200	6.98539e+06	5.55858e+06	7.32358e+06	6.64006e+06	5.18343e+06
A0A1S3YK97	protease Do-like 5, chloroplastic	LOC107777187	124920	139938	109433	129940	130214	121855
A0A1S3YKH3	Thioredoxin-dependent peroxiredoxin	LOC107777133	15837000	1.34858e+07	1.2497e+07	1.21135e+07	1.81073e+07	1.42935e+07
A0A1S4B6I8	short-chain dehydrogenase TIC 32, chloroplastic-like	LOC107805022	11698	4601.4	0	0	0	14341
A0A1S3ZQ51	Protein transport protein SEC23	LOC107789170	155240	128868	205523	93493.6	127749	258707
A0A1S3YKQ6	uncharacterized protein LOC107777139 isoform X3	LOC107777139	396210	398228	396389	491675	369783	489223
A0A1S3YKI8	Succinate dehydrogenase [ubiquinone] flavoprotein subunit, mitochondrial	LOC107777278	206680	19443.2	53806.7	143341	16508.7	221193
A0A1S3YL03	calmodulin-binding transcription activator 3-like isoform X3	LOC107777284	41937	40751.9	33423.3	32639.5	34104.5	34946.3
A0A1S4AZ72	thioredoxin-like 3-1, chloroplastic	LOC107802806	398430	791440	367348	638088	463519	493725
A0A1S3YKP6	Phosphoserine aminotransferase	LOC107777146	223460	213180	195667	214679	236897	200511
A0A1S3YKS3	probable zinc metalloprotease EGY2, chloroplastic isoform X2	LOC107777223	438860	374233	236636	467831	348190	201186
A0A1S3YKU4	Probable 6-phosphogluconolactonase	LOC107777249	303990	226272	303918	348570	310220	331922
A0A1S4BCY2	wound-induced basic protein-like	LOC107806918	118570	0	86913.6	137444	0	108528
A0A1S3YL10	uncharacterized protein LOC107777172	LOC107777172	1736800	3.2573e+06	2.25295e+06	1829411	3.71572e+06	2.30461e+06
A0A1S3YL55	small nuclear ribonucleoprotein SmD3b-like	LOC107777296	172850	119117	85435.8	166478	154835	84940.3
A0A1S3YL73	eukaryotic translation initiation factor-like isoform X1	LOC107777479	339250	603354	623806	660437	657320	792700
A0A1S3YL98	glutathione S-transferase DHAR2-like	LOC107777254	0	469240	137059	0	327101	0
A0A1S3YLA5	Glyceraldehyde-3-phosphate dehydrogenase	LOC107777241	137930000	1.19337e+08	1.54627e+08	1.20848e+08	1.40053e+08	142116431
A0A1S3YLB2	GDSL esterase/lipase LTL1-like	LOC107777269	1594200	1.61535e+06	1.41487e+06	1.42983e+06	1.27164e+06	1.47635e+06
A0A1S4BR96	protein HOTHEAD-like	LOC107811073	127820	39164	35963.5	96319.2	57822.9	41068.9
A0A1S3YLC4	uncharacterized protein LOC107777504	LOC107777504	579020	591394	523794	414359	460835	129154
A0A1S3YLC5	Phosphoenolpyruvate carboxylase	LOC107777405	884370	628753	722171	891783	548172	660028
A0A1S3YM15	Endo-1,3(4)-beta-glucanase	LOC107777521	327490	281479	191634	205301	223789	307834
A0A1S4CYG4	iron-sulfur assembly protein IscA, chloroplastic-like isoform X2	LOC107823988	20187	13743.5	30257.3	0	11234.1	24884.2
A0A1S3YLE7	uncharacterized protein LOC107777315	LOC107777315	18613	21997.8	24934.3	23739.7	25027.9	26642.7
A0A1S3YLG0	Carbonic anhydrase	LOC107777551	44192	56108.3	0	91170.6	75218	101911
A0A1S4A1T7	prosaposin-like	LOC107792809	131400	141562	116054	127841	105575	98309.2
A0A1S4B319	cullin-associated NEDD8-dissociated protein 1-like isoform X2	LOC107804026	2977900	3.9804e+06	2.79092e+06	395152	3.33098e+06	541900
A0A1S3YLJ1	glyoxylate/succinic semialdehyde reductase 1-like	LOC107777564	1922700	1.71569e+06	2.1552e+06	1.94735e+06	1.59823e+06	1.82739e+06
A0A1S3YLK6	sec-independent protein translocase protein TATC, chloroplastic-like	LOC107777379	51569	89218.6	52402.7	45547.4	85527.3	42922.5
A0A1S3YLL8	chaperone protein ClpB3, chloroplastic-like	LOC107777392	2678800	2.30242e+06	2.76777e+06	2.93592e+06	2.72572e+06	2.88336e+06
A0A1S4CPJ8	glucose-induced degradation protein 8 homolog isoform X2	LOC107821253	124130	101331	32671.2	89536.6	108444	107816
A0A1S4AV37	preprotein translocase subunit SECE1-like	LOC107801536	278920	567409	258117	637402	251839	181002
A0A1S3YLN8	NADPH--cytochrome P450 reductase-like	LOC107777414	49148	11312.6	66246.1	35074	0	16384.9
A0A1S3YLS0	rhodanese-like domain-containing protein 4A, chloroplastic	LOC107777443	98092	187845	61618.5	104457	99006.3	85320.7
A0A1S3YLS7	chaperone protein dnaJ A6, chloroplastic-like	LOC107777513	5312.3	61327.3	64824.8	10167.5	62491.3	72891.9
A0A1S3YLS8	S-(hydroxymethyl)glutathione dehydrogenase	LOC107777450	541830	521199	0	538739	547266	439411
A0A1S3YLV1	patellin-3-like	LOC107777688	4245500	5276825	3.73039e+06	4.14031e+06	4.11777e+06	2.66073e+06
A0A1S3ZRR1	nucleoid-associated protein At4g30620, chloroplastic-like	LOC107789621	2251900	1.8995e+06	2.15621e+06	2.94862e+06	3.714e+06	3.12501e+06
A0A1S4CG96	mitochondrial import receptor subunit TOM40-1-like	LOC107818614	809730	863467	837598	877880	603285	631683
A0A1S4AJE0	40S ribosomal protein S18-like	LOC107798308	272780	207126	178726	77763	157369	144682
A0A1S3YM56	Cysteine synthase	LOC107777625	8424300	8.27302e+06	7.27417e+06	7.55445e+06	7.67203e+06	9.43089e+06
A0A1S3YM77	LOW QUALITY PROTEIN: protease Do-like 7	LOC107777755	120620	99987.6	98517	166908	112202	96450.1
A0A1S3YMA4	GDSL esterase/lipase At5g33370-like	LOC107777528	2778500	3.78245e+06	2929501	2.35083e+06	4.76477e+06	2.12898e+06
A0A1S4CDI0	cytochrome c	LOC107817803	54654	104295	114325	46437.1	0	189883
A0A1S4BTB5	uncharacterized protein LOC107811668	LOC107811668	766480	764868	261786	261783	633284	310588
A0A1S3YME9	Aldehyde dehydrogenase	LOC107777569	1018700	590116	934406	709354	828634	1.00499e+06
A0A1S3YMF2	peptidyl-prolyl cis-trans isomerase CYP21-3, mitochondrial-like	LOC107777638	131610	127852	45879.8	63574.3	56437.6	107446
A0A1S3YMF9	protein transport protein SEC13 homolog B	LOC107777830	690550	644086	770135	505701	883530	207435
A0A1S3YMH1	putative MO25-like protein At5g47540	LOC107777706	319920	381795	299884	366896	404335	263363
A0A1S3YMI7	somatic embryogenesis receptor kinase 2-like	LOC107777855	75255	82246.3	93646.8	81094.4	52633.8	105371
A0A1S3YMJ1	callose synthase 10-like	LOC107777660	108030	0	91156.1	0	81824.5	86681.1
A0A1S4DB64	probable ubiquitin conjugation factor E4	LOC107827966	86541	56336.6	67352.9	70807.4	17058	70561.6
A0A1S3YMJ8	Fumarylacetoacetase	LOC107777843	453010	428256	463731	327459	266288	477976
A0A1S3YMK6	major latex allergen Hev b 5-like	LOC107777715	458890	368923	471878	320764	559628	375032
A0A1S3YML4	preprotein translocase subunit SECE1-like isoform X1	LOC107777626	215560	243480	223496	223923	171922	181356
A0A1S3Z706	putative late blight resistance protein homolog R1C-3	LOC107783693	0	59385.5	72147.3	27759.1	36283.4	26017.8
A0A1S3YMN5	heat shock 70 kDa protein 16-like	LOC107777893	11185	14079.7	10376.2	10647.4	10875	0
A0A1S3YMP2	uncharacterized protein LOC107777748	LOC107777748	48104	56260.2	43726.7	53793	47518.1	0
A0A1S3YMP7	uncharacterized protein LOC107777905 isoform X2	LOC107777905	0	299242	224345	438745	195006	0
A0A1S4BSA1	tetraspanin-3-like	LOC107811372	202280	285312	182658	202516	108866	102226
A0A1S4C1U9	protein NDH-DEPENDENT CYCLIC ELECTRON FLOW 5-like	LOC107814258	121140	23929.1	115943	93085.1	89041	45489.4
A0A1S4APT5	50S ribosomal protein L31	LOC107799884	3271800	2.47282e+06	4.22266e+06	3.16208e+06	3.71732e+06	4200453
A0A1S3YND5	Methionyl-tRNA formyltransferase	LOC107777949	50147	81433.5	180838	50016.3	47170.7	156671
A0A1S3YMW0	basic blue protein-like	LOC107777966	86485	73386.6	75999.6	64437.4	56730	0
A0A1S4D087	CAAX prenyl protease	LOC107824440	33468	26364.2	34568.5	0	0	23302.7
A0A1S3YMX1	ATP-dependent Clp protease proteolytic subunit	LOC107777950	1308000	1.14089e+06	920487	1.02789e+06	872177	1.06948e+06
A0A1S3YMX2	uncharacterized protein LOC107777802	LOC107777802	166180	141038	142144	176634	96373.4	155134
A0A1S4CS15	transcription initiation factor IIB-2-like	LOC107821873	16825	14237.9	16531.2	19361.9	26141.4	13429.7
A0A1S3YMX8	Acyl-[acyl-carrier-protein] desaturase	LOC107777747	1428600	1.22447e+06	786248	768908	893414	793607
A0A1S3YMY0	ATPase family AAA domain-containing protein 3-like	LOC107777704	112800	38742	9005.2	98832.6	0	116314
A0A1S3YMZ4	Sulfate adenylyltransferase	LOC107777973	3316000	3.33554e+06	3738169	4.0495e+06	3.3944e+06	3.75552e+06
A0A1S3ZNN0	uncharacterized protein LOC107788717	LOC107788717	0	352500	7936.1	269421	300014	307912
A0A1S3YN45	50S ribosomal protein L12, chloroplastic	LOC107777790	5676800	5.89131e+06	5.2619e+06	6.06094e+06	5.35787e+06	4.54463e+06
A0A1S3YN46	protein transport protein SEC31 homolog B-like	LOC107777739	16502	259296	241468	91479.8	165259	179421
A0A1S3YN49	single-stranded DNA-binding protein WHY1, chloroplastic-like	LOC107778020	34663	38163.8	24298.5	37358.1	42108.9	24874.2
P51133	Cytochrome b-c1 complex subunit Rieske-3, mitochondrial		371040	497791	331685	413058	386067	357282
A0A1S3YNN6	serine-threonine kinase receptor-associated protein-like isoform X1	LOC107778059	100410	75428	83944.8	76168	79011.5	88273.7
A0A1S3YN86	Glycerophosphodiester phosphodiesterase	LOC107778062	2886600	3.32601e+06	2.13407e+06	2.61773e+06	1.93962e+06	1.64037e+06
A0A1S3YN88	photosynthetic NDH subunit of subcomplex B 2, chloroplastic-like	LOC107777778	0	47217.2	0	65537.9	0	54616.9
A0A1S4DHQ4	protein CREG1-like	LOC107829944	86778	312502	67610.7	4654.2	57400.9	67409.6
A0A1S3YNA4	probable polygalacturonase	LOC107777784	49863	43767.2	37483.8	0	41363.5	37951.2
A0A1S4CWW4	probable glycerol-3-phosphate dehydrogenase [NAD(+)] 2, cytosolic	LOC107823495	15557	17430.2	11438.6	20313	10651.3	10898.1
A0A1S3YNC4	Glutamine synthetase	LOC107777858	3813400	988648	732239	493897	3943464	3676447
A0A1S3YNC8	PGR5-like protein 1A, chloroplastic	LOC107778116	20653	15933.5	21785.5	0	16562.6	14487
A0A1S3YNE1	Transmembrane 9 superfamily member	LOC107777871	544920	188745	50064.6	680872	644683	17474.2
A0A1S3Z8M6	uncharacterized protein LOC107784179	LOC107784179	77266	100299	81915	84003	89401.1	82255
A0A1S3YNF1	uncharacterized protein DDB_G0284459-like	LOC107778137	506270	279908	998665	1.06873e+06	639156	925018
A0A1S4BEB2	Secretory carrier-associated membrane protein	LOC107807418	39876	0	0	27631.1	36878.5	28003
A0A1S3YNF7	30S ribosomal protein S15, chloroplastic	LOC107777878	57843	90254.4	91034.8	99188.9	108849	100472
A0A1S3YNG0	Magnesium-protoporphyrin IX monomethyl ester (oxidative) cyclase	LOC107777980	5468400	3.68997e+06	4.767e+06	5.36405e+06	4.65285e+06	3.97616e+06
A0A1S3YNH7	AT-hook motif nuclear-localized protein	LOC107777903	17165	10921.9	9704.1	9076.7	15575.2	8025.2
A0A1S3YNJ0	peptidyl-prolyl cis-trans isomerase CYP37, chloroplastic-like isoform X2	LOC107778011	190510	274126	188460	201850	189008	239076
A0A1S3YNL1	Protein phosphatase	LOC107778176	166330	218574	244844	301803	205671	92453.1
A0A1S4A9Y6	Cellulose synthase	LOC107795298	58821	45250.3	31109.5	48259.4	6709.4	0
A0A1S4BAU5	LIM domain-containing protein WLIM1-like	LOC107806384	0	55805.6	0	149801	0	0
A0A1S3YNM7	ubiquitin-conjugating enzyme E2 variant 1C isoform X2	LOC107778179	56163	0	0	60606.3	0	47709.1
A0A1S4CZ88	xylem cysteine proteinase 1-like	LOC107824213	0	183666	250222	187313	152668	0
P94026	Ribulose-1,5 bisphosphate carboxylase/oxygenase large subunit N-methyltransferase, chloroplastic	RBCMT	121450	112487	116337	131035	113751	69685.7
A0A1S3YNS1	uncharacterized protein LOC107778230 isoform X2	LOC107778230	73854	153334	99304.4	90277.8	180591	48192.4
A0A1S3Z713	peroxisomal membrane protein PMP22-like	LOC107783756	25329	26604.1	21944.2	22663.6	20053.3	24175.3
A0A1S3YNU2	multiple organellar RNA editing factor 2, chloroplastic-like	LOC107777961	205590	0	0	0	0	0
A0A1S3YNU7	rhodanese-like domain-containing protein 4, chloroplastic	LOC107777965	1827800	1.97679e+06	3.0694e+06	2.63933e+06	2.86723e+06	2.34763e+06
A0A1S3Z955	uncharacterized protein LOC107784177	LOC107784177	86838	188127	85814.8	85754.7	75146.9	284919
A0A1S3YNW9	glyoxylate/hydroxypyruvate reductase HPR3-like	LOC107778119	18477	36576	0	0	23217.2	27084
A0A1S3YP00	uncharacterized protein LOC107778021	LOC107778021	60686	67970.7	59552.3	47804.9	61205.8	31366.3
A0A1S3YPQ8	nuclear pore complex protein NUP133-like isoform X2	LOC107778265	52985	43997.6	0	66550.5	0	0
A0A1S3YP19	Serine/threonine-protein phosphatase	LOC107778280	51613	39756.9	46644	0	0	53411.4
A0A1S3YP25	protein BTR1-like isoform X3	LOC107778299	20491	11830	18110.1	13031.8	16253	9660.7
A0A1S3YP28	Proteasome subunit beta	LOC107778088	709150	1.09858e+06	841348	944252	691058	761954
O82797	Proliferating cell nuclear antigen	PCNA	1133300	1.30795e+06	650341	841576	937828	898884
A0A1S3YP36	probable fructokinase-6, chloroplastic	LOC107778295	259180	235269	246462	255886	262263	129851
A0A1S3YP56	protein high chlorophyll fluorescent 107-like	LOC107778023	52114	20576.5	22128.2	23896.3	22104.9	113936
A0A1S3YP68	carbamoyl-phosphate synthase small chain, chloroplastic-like isoform X2	LOC107778194	34966	32403.3	35150.8	1743	26229.7	0
A0A1S4C0B5	3-hydroxyisobutyrate dehydrogenase	LOC107813802	15979	3097.1	12156.3	7710.1	0	17785
A0A1S3YP91	Starch synthase, chloroplastic/amyloplastic	LOC107778346	63058	68389.7	81923.1	46482.1	35825.8	93033.7
A0A1S4CA69	Xyloglucan endotransglucosylase/hydrolase	LOC107816794	27801	37623.4	18785.4	21559	45101.9	16556.3
A0A1S3YPB5	Histidine--tRNA ligase	LOC107778161	286320	441872	300400	375844	819930	397251
A0A1S3ZML0	CDP-diacylglycerol--inositol 3-phosphatidyltransferase	LOC107788433	98436	133759	0	0	92073	98921.9
A0A1S4AAS9	V-type proton ATPase subunit E-like	LOC107795598	275250	297723	188410	166427	264178	15933.6
A0A1S3YPD5	Endoplasmic reticulum transmembrane protein	LOC107778181	92191	94231.3	67401.5	1808.7	104643	57595.3
A0A1S3YPD8	Thioredoxin-dependent peroxiredoxin	LOC107778186	132230	232504	303443	75707.2	72220.4	339796
A0A1S3YPE9	Chlorophyll a-b binding protein, chloroplastic	LOC107778264	38995000	5.50588e+07	3.69865e+07	4.60767e+07	3.8687e+07	4.96932e+07
A0A1S4D6T2	cell wall / vacuolar inhibitor of fructosidase 2-like	LOC107826608	27286	29862.4	19284.7	25833.3	27490	0
A0A1S4D3J6	protein TIC 22-like, chloroplastic	LOC107825504	40997	40934.1	33504.1	46583.5	154044	35118.8
A0A1S3ZTU8	uncharacterized protein SYNPCC7002_A1590-like	LOC107790384	452290	390991	430302	355010	170190	477080
A0A1S3YPI4	dnaJ protein P58IPK homolog	LOC107778306	61938	25536.8	0	52695.5	48716.5	31024.5
A0A1S3Z6N1	glyoxylate/succinic semialdehyde reductase 2, chloroplastic-like	LOC107783419	2164700	2.6935e+06	2.56954e+06	2.48095e+06	3.05037e+06	2.36079e+06
A0A1S3YQ48	E4 SUMO-protein ligase PIAL2-like	LOC107778434	246920	220585	217319	253286	279418	337629
A0A1S3YPM8	Putative gamma-glutamylcyclotransferase	LOC107778443	0	53024.9	41320.9	45601.7	18025.9	0
A0A1S3ZU41	lactoylglutathione lyase-like	LOC107790415	854480	353736	482178	499681	553596	534678
A0A1S3YPQ9	GDSL esterase/lipase At5g03980-like isoform X1	LOC107778460	616300	1367542	684204	679766	615166	633087
A0A1S3YPR6	Proteasome subunit beta	LOC107778362	306280	95403.3	0	153661	249958	0
A0A1S3YPT0	60S ribosomal protein L10-like	LOC107778281	596230	408587	530436	541176	132508	497131
A0A1S3YPU3	protein PLASTID TRANSCRIPTIONALLY ACTIVE 12-like	LOC107778483	96550	90736.2	110454	56226.6	101506	73599.7
A0A1S4CSK0	uncharacterized protein LOC107822099	LOC107822099	54758	49788.5	41307.8	22007.4	49237.1	21877.1
A0A1S4CY58	uncharacterized protein At1g26090, chloroplastic-like isoform X4	LOC107823871	98742	110424	88449.1	37893.6	0	99738.1
A0A1S3YPY3	subtilisin-like protease SBT1.8	LOC107778373	1269500	1.34188e+06	1.55537e+06	1.35243e+06	1.16132e+06	1.46308e+06
A0A1S3YPY7	uncharacterized protein LOC107778514	LOC107778514	26815	27616.9	23734.4	21707.4	26120.8	18883.2
A0A1S3YPZ5	rhodanese-like domain-containing protein 14, chloroplastic	LOC107778332	817510	880539	727043	763266	913942	774828
A0A1S3ZVT7	microsomal glutathione S-transferase 3-like	LOC107790974	103240	105773	84784.8	17252.9	17621.1	24051.4
A0A1S3YQ08	programmed cell death protein 4-like	LOC107778399	263260	262364	257632	273137	176451	303665
A0A1S3YQ11	haloalkane dehalogenase-like	LOC107778473	1488600	1.16132e+06	1.36544e+06	2.46109e+06	826742	1.64855e+06
A0A1S4ABH4	probable carboxylesterase 120	LOC107795735	24828	21418.6	31470.3	30684	7926.9	31818.6
A0A1S4CIK7	ATP citrate synthase	LOC107819406	888050	1012266	1.21967e+06	1.04375e+06	1.10831e+06	1.05862e+06
A0A1S3YQ54	protein SIEVE ELEMENT OCCLUSION B-like isoform X1	LOC107778376	1698600	2.71424e+06	2.55448e+06	1.96005e+06	2.79613e+06	1591704
A0A1S3YQ83	UDP-N-acetylmuramoyl-L-alanyl-D-glutamate--2, 6-diaminopimelate ligase-like	LOC107778530	219120	193909	254761	161943	234305	121291
A0A1S3YQ87	photosystem II 22 kDa protein, chloroplastic	LOC107778533	6118400	7.19853e+06	6.05854e+06	5.98006e+06	6.20533e+06	6.39502e+06
A0A1S3Z988	Uridine kinase	LOC107784213	42824	36723.7	16316.9	43667.7	36403.8	14923.9
A0A1S4AHB8	Uroporphyrinogen-III synthase	LOC107797441	157110	186588	183173	198216	199031	177386
A0A1S3YQB3	40S ribosomal protein S4	LOC107778484	0	0	31866.6	102656	71447.5	63142.8
A0A1S3YQC5	tropomyosin-like	LOC107778440	158040	186116	205634	199649	80317.6	177220
A0A1S4CST8	Sulfhydryl oxidase	LOC107822098	0	16325.2	13951.5	0	0	0
A0A1S3YQF5	renalase-like	LOC107778466	147730	178293	239942	147323	164571	241156
A0A1S3YQG3	50S ribosomal protein L1-like	LOC107778475	61178	28817.1	23544.4	0	41090.6	55772.7
A0A1S3YQG6	Aspartate aminotransferase	LOC107778680	0	137414	0	0	91332.2	0
A0A1S3YQI2	Fructose-bisphosphate aldolase	LOC107778620	15803000	1.44693e+07	1.94282e+07	1.50006e+07	1.43299e+07	2.08231e+07
A0A1S4CZY7	DEAD-box ATP-dependent RNA helicase 35	LOC107824327	68532	56166.9	46035.4	50676.6	0	48786.3
A0A1S3YQL8	protein CHUP1, chloroplastic-like	LOC107778512	14203	16786.1	0	30412.7	21079.7	21561.9
A0A1S3YQM5	U2 small nuclear ribonucleoprotein A-like	LOC107778732	915590	967146	806545	882507	659224	816567
A0A1S3YR74	CCR4-NOT transcription complex subunit 11	LOC107778760	51132	38584.9	41319.9	42006.1	39281	33934.3
A0A1S3YQQ9	hypersensitive-induced response protein 1-like	LOC107778545	12233	24120.8	7806.8	9889	7800.2	15076.5
A0A1S3YQS9	Malate dehydrogenase [NADP], chloroplastic	LOC107778629	6285000	7.95043e+06	8.22062e+06	7.09384e+06	8.57246e+06	7086799
Q94EW1	Nictaba	NT1	293790	420611	345150	140075	583332	258287
A0A1S3YQU6	Adenylate kinase	LOC107778794	16646	15809.9	71758.2	77049.4	95293.1	97020.7
A0A1S4DAG5	ras-related protein RABA5b-like	LOC107827693	18672	7572.9	20338	11109.1	6594.8	15987.8
A0A1S3YR05	uncharacterized protein At3g49720-like	LOC107778703	165080	132450	14186.1	27798	6.20705e+06	153419
A0A1S3YR11	exportin-2-like	LOC107778826	399400	352689	194838	114859	320897	170650
A0A1S3YR13	1,4-alpha-glucan-branching enzyme 1, chloroplastic/amyloplastic-like isoform X2	LOC107778845	489160	444176	457271	423092	394415	975273
A0A1S3YR16	Malic enzyme	LOC107778847	13229000	1.33455e+07	1.36887e+07	9.28127e+06	1.1807e+07	1.06701e+07
A0A1S4AA82	Pyroglutamyl-peptidase I	LOC107795383	12336	9393.1	0	0	8422.5	0
A0A1S3YR67	protein CROWDED NUCLEI 1-like	LOC107778685	4565.8	1.28407e+06	145520	541616	830526	16023.2
A0A1S3YR78	Pyruvate kinase	LOC107778911	1460800	1.19148e+06	66356.3	1.47231e+06	1.42335e+06	2.93943e+06
A0A1S3YRB7	PHD finger-like domain-containing protein 5B	LOC107778796	25558	6646.3	25532.7	16480	0	29520.4
A0A1S3YRC8	Exocyst complex component	LOC107778868	122200	51779.5	94721.3	48439.6	132886	96395.9
Q4ZFU8	Putative basal resistance related chitinase (Fragment)	cht	16911	12682.5	10259	0	10718.3	9403
Q9FVE9	Aconitate hydratase	ACO	976020	778044	752051	815439	400436	886641
A0A1S3YRF9	Ribosome-recycling factor, chloroplastic	LOC107778986	8511600	1.04246e+07	1.2594e+07	1.34649e+07	1.06668e+07	9.46164e+06
A0A1S3YRG8	ATP citrate synthase	LOC107778993	206290	108109	117702	136819	527576	127042
Q8GZV0	Obtusifoliol-14-demethylase	CYP51	21825	49209.3	91706	94191.8	58317.1	34061.5
A0A1S3YRJ5	GDSL esterase/lipase At5g03980-like	LOC107778783	0	138744	107240	17359.4	77506.9	109724
A0A1S4DCJ5	60S ribosomal protein L27a-3-like	LOC107828389	905240	620395	558395	703661	124068	567437
A0A1S3YRK4	mediator of RNA polymerase II transcription subunit 36a-like	LOC107779020	1007300	501540	717066	641476	588423	577966
A0A1S3ZTR7	60S ribosomal protein L18-2-like	LOC107790359	28514	171202	25899.6	160295	171646	160077
A0A1S4C474	probable calcium-binding protein CML50	LOC107814887	0	41153	25642.9	26904.2	25022.2	26035.5
A0A1S3YRP6	Peptidyl-prolyl cis-trans isomerase	LOC107779077	14635000	1.48684e+07	1.45085e+07	13922525	1.65236e+07	9.69013e+06
A0A1S3YRR0	50S ribosomal protein L12, chloroplastic-like	LOC107779056	4345100	3.71667e+06	3885852	3.01127e+06	6.15647e+06	3.53732e+06
A0A1S3YRR6	nascent polypeptide-associated complex subunit alpha-like protein 2	LOC107778929	1624500	7.24325e+06	1.61703e+06	2.03622e+06	1.56853e+06	7.44856e+06
A0A1S3YRS6	Carboxypeptidase	LOC107779028	4137.4	119190	17912	0	91552.4	0
A0A1S4DFS3	uncharacterized protein LOC107829353	LOC107829353	27770	10782.6	28969.5	13230.4	25925.9	36200.4
A0A1S4B7D0	Glycine cleavage system H protein	LOC107805221	8411000	9644015	9.93641e+06	1.00879e+07	7.67363e+06	8.90346e+06
A0A1S4DC93	quinone oxidoreductase-like	LOC107828250	93167	44886.8	90415.1	86968.9	46987.2	78301.2
A0A1S3YRU3	ras-related protein RABD2a-like	LOC107779090	0	152506	0	0	85825.5	0
A0A1S3YRV5	putative methyltransferase DDB_G0268948	LOC107779100	17720	27016.7	19072.4	27577.8	7394.4	35035.8
A0A1S4B9N2	Alkaline/neutral invertase	LOC107805913	18666	13565.4	0	3022	10287.4	19076.8
A0A1S3YRX0	bifunctional epoxide hydrolase 2-like	LOC107778876	11189	0	11385	19004.6	0	10053.7
Q76MF3	Calmodulin NtCaM11	NtCaM3	8570400	9.23282e+06	8.09244e+06	4.35449e+06	6.7224e+06	6804778
A0A1S4C4G1	protein SUPPRESSOR OF K(+) TRANSPORT GROWTH DEFECT 1	LOC107815059	398970	306406	380569	292466	59319.4	166160
A0A1S3YS15	1-deoxy-D-xylulose-5-phosphate reductoisomerase	LOC107779016	2196900	2.84537e+06	2.84186e+06	3.2403e+06	3454946	3.35096e+06
A0A1S4BYY9	serine/threonine-protein kinase CTR1-like	LOC107813372	7394.4	16933.8	9053.9	0	10762.2	12807.1
A0A1S4CHP1	26S proteasome regulatory subunit 4 homolog A-like	LOC107819147	1923400	1.31015e+06	1382519	1.36174e+06	897176	1.39739e+06
A0A1S3ZK87	uncharacterized protein LOC107787586 isoform X1	LOC107787586	0	79801.7	0	0	81229.3	4332.8
A0A1S3YSQ8	uncharacterized protein LOC107779203 isoform X2	LOC107779203	211640	118216	128497	139164	129354	116303
A0A1S3YSA1	NAD(P)H dehydrogenase (quinone)	LOC107779006	138970	0	0	0	0	100500
A0A1S3YSB1	cell division cycle 5-like protein	LOC107779232	53027	45869.3	48888	42500.6	71128.7	38196.7
A0A1S3YSD3	rho-N domain-containing protein 1, chloroplastic	LOC107779204	476920	431178	154385	496180	28476.2	475808
A0A1S3YSE5	protein EXORDIUM-like	LOC107779136	497250	522550	408307	471302	512520	446909
A0A1S3YSK2	flowering locus K homology domain-like isoform X2	LOC107779259	26668	19386.7	21972.5	33183.1	25030.2	24963.8
A0A1S3Z2N1	universal stress protein A-like protein	LOC107782091	9144.9	60977.5	88433.9	95842.1	37338.4	38047.4
A0A1S3YSH5	replication factor C subunit 2-like	LOC107779141	156670	97944.2	90274.6	174853	109599	78279.1
A0A1S3YSJ7	Citrate synthase	LOC107779254	2530900	3.5425e+06	3.26399e+06	2.8447e+06	2.80187e+06	2.28636e+06
A0A1S3YSN4	Pyruvate decarboxylase	LOC107779126	220420	24087.3	18793.4	46992	8544.8	6433
A0A1S3YSQ1	putative D-cysteine desulfhydrase 1, mitochondrial	LOC107779353	109870	92162.7	104166	133441	115903	122840
A0A1S3YSQ9	40S ribosomal protein S3a	LOC107779358	5827900	6.34618e+06	5.36551e+06	5.06029e+06	5.99673e+06	5.30797e+06
A0A1S3YT05	Folylpolyglutamate synthase	LOC107779364	0	13307.8	87359.4	29316.2	22185.1	23142.3
A0A1S3YTK3	far upstream element-binding protein 1-like isoform X2	LOC107779386	274320	352574	312580	332384	277997	295315
A0A1S3YSV5	biotin carboxyl carrier protein of acetyl-CoA carboxylase, chloroplastic-like isoform X1	LOC107779394	329340	290140	305909	311294	311321	285991
A0A1S3YSV7	PRA1 family protein	LOC107779395	72134	62342.2	58623.4	71776.9	112457	87634.4
A0A1S3YSX4	protein YIF1B-like	LOC107779198	117400	78247.5	101124	139215	87028.4	137604
A0A1S4BX55	acidic mammalian chitinase-like	LOC107812827	36807	45680.7	42808.9	19963.9	60131.3	18213
A0A1S3YT31	sedoheptulose-1,7-bisphosphatase, chloroplastic-like	LOC107779243	5086600	4913390	5.43799e+06	5.41862e+06	4.94825e+06	6.17969e+06
A0A1S3YT33	fasciclin-like arabinogalactan protein 2	LOC107779390	2667000	3681272	4.17717e+06	4.18495e+06	4.81167e+06	2.5936e+06
A0A1S3YT47	ER membrane protein complex subunit 10-like	LOC107779401	133270	181309	189491	273209	199008	199273
A0A1S3YT65	plastid division protein PDV2-like	LOC107779470	0	24135.4	13619	21560	17280.5	18052.7
A0A1S3YTA0	DNA topoisomerase (ATP-hydrolyzing)	LOC107779491	316590	146118	239780	143464	230544	172354
A0A1S3YTB9	transcriptional regulator DEF1-like	LOC107779482	211270	135801	178180	155616	97543.1	98533.7
A0A1S3YTC2	Proline--tRNA ligase	LOC107779488	103180	55551.1	76807.3	57771.5	5102.1	43849.3
A0A1S3YTD5	heat shock cognate 70 kDa protein 2-like	LOC107779564	94822	32413.8	102590	24892.4	165958	98444.1
A0A1S4CBE9	acetyltransferase NSI-like	LOC107817186	131040	127946	139495	265100	87132.8	131820
A0A1S3YTL8	Dolichyl-diphosphooligosaccharide--protein glycotransferase	LOC107779648	63976	128888	37053.2	163520	27410.9	18465.2
A0A1S4BC30	alpha-soluble NSF attachment protein-like	LOC107806719	103980	58537.1	95496.6	75668.3	72103.4	108568
A0A1S3YTN7	protein LOW PSII ACCUMULATION 1, chloroplastic-like	LOC107779630	437190	876716	634451	832874	1.23987e+06	802930
Q33DL3	Chalcone--flavanone isomerase	CHI	41052	46003.3	37295.8	36922	31450.9	44331.5
A0A1S4BB42	26S proteasome non-ATPase regulatory subunit 13 homolog B-like	LOC107806446	154140	68250.4	93324.3	55993.1	68391.4	68262.3
A0A1S3YTV3	FAM10 family protein At4g22670-like	LOC107779484	384570	548378	498109	589560	293226	187892
A0A1S3YTV5	far upstream element-binding protein 1-like isoform X2	LOC107779634	27205	29425.7	18963.3	25854.8	31768.6	21146
A0A1S3YTY7	probable transmembrane GTPase FZO-like, chloroplastic	LOC107779756	239460	206854	101185	207103	216955	103042
A0A1S3YTZ6	Histidinol dehydrogenase, chloroplastic	LOC107779522	1459700	1.13063e+06	1.01559e+06	1.31639e+06	1.12199e+06	1.1178e+06
A0A1S4CS20	Ketol-acid reductoisomerase	LOC107821876	1745200	1.54224e+06	1.95819e+06	3.11386e+06	2.93856e+06	2.8347e+06
A0A1S3ZRV1	uncharacterized protein LOC107789770	LOC107789770	30753	23842.2	21238.7	20977.5	26506.1	20984.6
A0A1S4BBI9	plant intracellular Ras-group-related LRR protein 1-like	LOC107806621	114950	63646.2	60183.1	124452	130248	102006
P41919	GTP-binding nuclear protein Ran-B1	RAN-B1	5723100	4.17887e+06	4.48093e+06	4.07325e+06	3.73739e+06	5.50627e+06
A0A1S3YU32	splicing factor 3B subunit 3-like	LOC107779569	118240	129423	99629.9	102125	113181	43430.1
A0A1S4C5Y0	Acyl carrier protein	LOC107815250	687700	634398	635947	667030	697400	726563
A0A1S3YU69	Glutathione transferase	LOC107779707	20294	34527.4	32713.7	12016.2	28469.4	21757.6
A0A1S3YU75	mitochondrial phosphate carrier protein 3, mitochondrial-like	LOC107779610	1120200	1.09586e+06	1.10363e+06	821469	1.0104e+06	1.25461e+06
A0A1S3YU94	Phospholipase D	LOC107779725	439060	466642	301168	445994	608354	397207
A0A1S3YUB5	RING-type E3 ubiquitin transferase	LOC107779647	48501	88316.8	55970.9	111818	77914	96867
A0A1S4CZX6	Serine hydroxymethyltransferase	LOC107824466	0	9197.5	28985.7	0	21668	32916.8
A0A1S3YUD3	protein NRT1/ PTR FAMILY 6.4-like	LOC107779762	174950	189185	159014	154551	167346	176324
A0A1S4CXK8	expansin-like B1	LOC107823695	0	14810.8	480490	5709.3	532920	6084.5
A0A1S3YUH0	60S ribosomal protein L4-1-like	LOC107779688	147180	162174	405507	545793	444620	39083.7
A0A1S3YUH8	Ferrochelatase	LOC107779891	681570	504756	531062	521427	456787	378306
A0A1S3YUL3	Glutathione transferase	LOC107779706	173290	247094	198265	25839.4	235727	163738
A0A1S3YUL6	protein WVD2-like 5 isoform X2	LOC107779975	42055	58458.6	54192.9	85939	59734.5	72132.1
A0A1S3YUM9	trafficking protein particle complex subunit 2-like isoform X2	LOC107779723	58650	61962	45289.5	57118.3	143734	40967.1
A0A1S3YUN7	40S ribosomal protein S16-like	LOC107779727	226740	62457.4	208657	169816	91335.7	205754
A0A1S3YUP2	plant UBX domain-containing protein 4-like	LOC107779764	6636.6	6768.1	66827.3	91164.4	46884	54531.8
A0A1S3YUQ3	secoisolariciresinol dehydrogenase-like	LOC107780016	206420	72408.4	56362.1	0	0	0
A0A1S3YUS5	aconitate hydratase, cytoplasmic-like isoform X1	LOC107779772	2136500	62728.7	1.83679e+06	57822.7	2.06921e+06	98071.4
A0A1S4BME7	uncharacterized protein LOC107809889	LOC107809889	108610	186577	100530	120469	109738	116259
A0A1S3YUT4	monodehydroascorbate reductase	LOC107779915	8444800	1.14131e+07	9.6182e+06	1.24606e+07	1.01784e+07	1.0196e+07
A0A1S3YUU6	UTP--glucose-1-phosphate uridylyltransferase	LOC107779796	827800	711662	711931	753182	813967	1.00373e+06
A0A1S3ZRE1	GTP cyclohydrolase II	LOC107789601	167560	242726	98812.2	498924	156108	139916
A0A1S3Z334	chloroplast stem-loop binding protein of 41 kDa b, chloroplastic	LOC107782473	51405000	5.08537e+07	5.56364e+07	4.7682e+07	3.79393e+07	5.84679e+07
A0A1S4A0D6	aspartyl protease AED3-like	LOC107792369	442660	208184	417101	669866	268180	229167
Q852T0	Vacuolar processing enzyme-3	NtVPE-3	26483	25081.2	20527	0	18978.8	28331.5
A0A1S3YUY2	Phenylalanine--tRNA ligase	LOC107780097	94105	34639.4	82064.6	47647.2	22608.3	98507.1
A0A1S3YUZ1	Pyrophosphate--fructose 6-phosphate 1-phosphotransferase subunit beta	LOC107780108	116790	40272.2	46176	50998.1	53050.1	67978.1
A0A1S3YUZ2	Phospholipase D	LOC107779964	450690	365875	368005	417215	480342	560127
A0A1S4D301	sulfoquinovosyl transferase SQD2-like	LOC107825369	142400	116938	103156	33542.4	31801.8	72383.2
A0A1S3YV19	Glyceraldehyde-3-phosphate dehydrogenase	LOC107780142	5020000	5.23786e+06	6.61288e+06	7.1478e+06	3.13867e+06	5.93881e+06
A0A1S4CXI9	haloacid dehalogenase-like hydrolase domain-containing protein Sgpp	LOC107823693	16779	17296.2	26326.2	23163.3	20062.5	25675
A0A1S4CK41	uncharacterized protein LOC107819892	LOC107819892	111830	94440.7	130580	123776	115410	0
A0A1S4D367	vesicle-associated protein 1-1-like isoform X3	LOC107825464	51846	41287.1	41817.2	41537.2	46277.3	48042
A0A1S4CUH4	uncharacterized protein LOC107822718	LOC107822718	472210	520770	495542	508322	484264	0
A0A1S3YV76	VHS domain-containing protein At3g16270-like isoform X1	LOC107779943	42276	0	0	0	0	0
A0A1S3YV96	tRNA pseudouridine synthase A, mitochondrial-like	LOC107780205	5114.4	11050.7	9986.7	0	151039	0
A0A1S4D2U6	5-amino-6-(5-phosphoribosylamino)uracil reductase	LOC107825400	221240	190348	410025	205587	27470.5	202602
A0A1S4CJ98	uncharacterized protein LOC107819638	LOC107819638	680350	481420	460264	582322	395550	503103
A0A1S3YVD0	Photosystem I reaction center subunit II, chloroplastic	LOC107779933	0	669663	612212	635866	699223	627668
A0A1S3YVF2	Catechol oxidase	LOC107780127	987680	1.4395e+06	1.06876e+06	696310	1552134	387187
A0A1S3YVG4	farnesyl pyrophosphate synthase 1-like	LOC107779968	2440100	1.25223e+06	1.91856e+06	1.23623e+06	1393767	1.95579e+06
A0A1S3YVG8	putative L-ascorbate peroxidase 6 isoform X1	LOC107779974	47853	0	51031	44386.4	47007.8	0
A0A1S3YVK5	uncharacterized protein LOC107780331	LOC107780331	16396	300363	272006	22017.6	20598	0
A0A1S3YVL2	epimerase family protein SDR39U1 homolog, chloroplastic-like isoform X1	LOC107780014	0	1.85656e+06	0	0	0	1.68096e+06
A0A1S3Z7F6	nudix hydrolase 15, mitochondrial-like	LOC107783893	0	17787.4	14930	0	16692.2	0
A0A1S3ZE42	Sucrose-phosphate synthase	LOC107785687	104940	65624.6	17056.8	102252	54264.5	240956
A0A1S3YVN1	Alpha-amylase	LOC107780165	806040	834330	995137	1.09935e+06	705656	1.11426e+06
P83526	Ferredoxin		2299600	3.47065e+06	7.03571e+06	1.53036e+07	5620365	3.93192e+06
A0A1S3YVN6	photosynthetic NDH subunit of lumenal location 3, chloroplastic-like	LOC107780377	278310	629580	572517	475479	335002	650473
A0A1S3YVN8	Histone H2A	LOC107780380	0	0	67151.8	0	0	0
A0A1S3YVP8	endochitinase 3-like	LOC107780391	24259	42307.2	29883.3	0	12708.3	9974.1
Q6QND2	Glutaminase	Pdx2	223780	210384	262312	484806	215166	369669
A0A1S4BIR9	plant intracellular Ras-group-related LRR protein 6-like isoform X1	LOC107808710	109320	71444.8	69734.5	100310	72489.9	198310
A0A1S4A2L1	3-ketoacyl-CoA synthase	LOC107793072	0	0	6897.4	0	41086	0
A0A1S3YWL6	nucleolin-like isoform X3	LOC107780308	129880	126951	50828.8	96856.7	121843	176180
A0A1S3YW42	protein DETOXIFICATION 45, chloroplastic-like isoform X2	LOC107780510	609300	700749	0	0	674430	0
A0A1S3YW44	uncharacterized protein At3g49720-like	LOC107780341	102380	103392	100125	97251.9	76535.6	90808.5
A0A1S4ASA5	PHD finger protein ALFIN-LIKE 4-like	LOC107800878	0	59765.7	0	0	0	0
A0A1S3YW93	40S ribosomal protein S16-like	LOC107780276	0	11708.5	50685.3	0	0	74054.3
A0A1S4BJC5	probable peroxygenase 5 isoform X2	LOC107808920	87464	87315.5	88202.4	84927.5	83431.1	42933.5
A0A1S3YWC2	Spermidine synthase	LOC107780228	212410	166583	207019	255927	0	0
A0A1S3YWC5	protein RETICULATA-RELATED 1, chloroplastic-like	LOC107780410	644910	542031	963204	1.20674e+06	702663	494123
A0A1S3YWG7	Chlorophyll a-b binding protein, chloroplastic	LOC107780379	1475400	2.09745e+06	1.28265e+06	1.50968e+06	1.56395e+06	2.3358e+06
A0A1S3Z7D3	7-deoxyloganetic acid glucosyltransferase-like	LOC107783636	0	38806.9	25122.3	28101	0	0
A0A1S3YWI1	xaa-Pro dipeptidase-like	LOC107780472	278040	414002	293435	298978	196852	274058
A0A1S3YWJ8	cytochrome P450 94A2-like	LOC107780641	223320	251378	193646	200212	329142	229830
A0A1S3YWJ9	Translocase of chloroplast	LOC107780482	36443	45028.2	46399.3	54827	36146.9	37949
J7G1T0	Violaxanthin de-epoxidase	VDE	1741700	2.97828e+06	2.60159e+06	1.84958e+06	2.28892e+06	1.45788e+06
A0A1S3YWN7	translation initiation factor IF-2, chloroplastic-like	LOC107780681	1936200	1.51711e+06	2164501	2.39946e+06	2.20842e+06	2.02679e+06
A0A1S4CQE1	actin-depolymerizing factor 2-like	LOC107821365	820630	621652	800672	668136	813646	806547
A0A1S3YWQ7	protein CDI-like	LOC107780567	30725	24068.4	26684	29500.5	25063.5	0
A0A1S3YWR0	probable choline kinase 2	LOC107780698	73003	49594.7	53868.4	61604.5	60342.3	45447.4
A0A1S3YWV9	DNA-damage-repair/toleration protein DRT100-like	LOC107780748	657970	871658	677957	451942	846054	633076
A0A1S3YWW9	subtilisin-like protease SBT1.4	LOC107780325	162900	194223	115771	171086	130248	123282
A0A1S3YWX5	Phospholipase D	LOC107780633	424350	406042	383733	249508	314991	440185
A0A1S3YWX6	prostamide/prostaglandin F synthase-like	LOC107780627	107940	276190	113668	80783.2	442338	601711
A0A1S3YX02	40S ribosomal protein S4	LOC107780799	401610	412043	322770	387976	197230	128004
A0A1S3YX03	uncharacterized protein LOC107780363	LOC107780363	256470	112759	262777	304209	239947	253133
A0A1S3YX08	protein FAM63A-like	LOC107780665	43647	48267.7	68931.9	71861.9	38511.5	49465.4
A0A1S3ZX91	Transmembrane 9 superfamily member	LOC107791492	192350	19306	22549.7	27067	205579	141674
A0A1S3YX15	phosphoglucan phosphatase LSF2, chloroplastic	LOC107780579	60096	47346.1	0	45508.5	57059.1	50299.3
A0A1S3YX17	Beta-amylase	LOC107780374	76347	86189.6	120815	182255	545970	84406.1
A0A1S4C6P0	GTP-binding protein At2g22870-like	LOC107815781	0	12030	0	66641.6	0	0
A0A1S4DHU6	40S ribosomal protein S10-1-like	LOC107829891	3345000	2.24932e+06	2.60128e+06	3.00984e+06	2.87538e+06	1.84541e+06
A0A1S3YX74	thylakoid lumenal 15.0 kDa protein 2, chloroplastic-like	LOC107780836	5044900	4748116	4.7111e+06	6409030	3.67627e+06	6.0483e+06
A0A1S3YX75	uncharacterized protein LOC107780648	LOC107780648	371130	139236	161350	30915.4	176715	198410
A0A1S3YX78	DNA-damage-repair/toleration protein DRT111, chloroplastic-like	LOC107780693	24673	21088.7	17873.6	19030.2	27892.5	14109.9
A0A1S3Z8R6	glutaredoxin-C4-like	LOC107784219	124290	110518	103692	84543.6	145936	75863.6
A0A1S3ZW90	Phosphoserine phosphatase	LOC107791189	100160	241826	215106	260688	248708	228890
A0A1S3YXC4	Protoporphyrinogen oxidase	LOC107780878	421350	364640	418850	502159	276552	380408
A0A1S3YXD8	uncharacterized protein LOC107780904	LOC107780904	29160	4309.6	0	17110.6	19661.1	36412.8
A0A1S3YXE8	Starch synthase, chloroplastic/amyloplastic	LOC107780738	1105300	1144349	1.29822e+06	1.50784e+06	1.00872e+06	1.75893e+06
A0A1S4DFX0	NADH dehydrogenase [ubiquinone] 1 alpha subcomplex assembly factor 3	LOC107829281	61617	72648.2	23399.8	70448	348362	28782.7
A0A1S3YXG6	Malate dehydrogenase	LOC107780752	1517900	1.62331e+06	1.57266e+06	1.58616e+06	2.2348e+06	1.56527e+06
A0A1S3Z7D7	SEC12-like protein 1	LOC107783801	15266	12354.7	10553.1	12459.5	13802.4	13903.1
A0A1S3YXH1	uncharacterized protein LOC107780496	LOC107780496	0	14013.7	0	0	0	0
A0A1S3YXJ6	Long-chain-fatty-acid--CoA ligase	LOC107780949	1364800	1.15315e+06	979600	949494	754600	509628
A0A1S3YXL1	peroxisomal membrane protein 11-4-like	LOC107780758	52956	0	0	104324	160523	14763.5
A0A1S3YXL2	Cysteine--tRNA ligase	LOC107780846	647910	594871	574650	488727	580109	615325
A0A1S4AL52	putative phosphatidylglycerol/phosphatidylinositol transfer protein DDB_G0282179	LOC107798808	386600	335135	154021	98470.2	418451	300701
A0A1S3YXM6	protein PLASTID TRANSCRIPTIONALLY ACTIVE 10-like	LOC107780559	92068	68311.1	19943.8	84582.5	86364.5	0
A0A1S3ZA18	stem-specific protein TSJT1-like	LOC107784440	386570	823646	738546	500961	344118	345382
A0A1S3YXP2	NAD(P)H-quinone oxidoreductase subunit U, chloroplastic-like	LOC107780992	1970800	2016174	1.22159e+06	2.56265e+06	2.45188e+06	2.01606e+06
O82802	Sulfite reductase 1 [ferredoxin], chloroplastic	SIR1	3790200	4.03413e+06	3.60696e+06	3.89644e+06	6.73799e+06	3.77997e+06
A0A1S3YXS6	GDSL esterase/lipase At4g01130-like	LOC107780608	44763	50065	39655.1	46034.7	31571.3	31037.8
A0A1S3YXX8	L-ascorbate oxidase	LOC107780851	80934	66816.5	97999.4	69359.7	91703.8	54924.4
A0A1S3YXZ4	bifunctional dTDP-4-dehydrorhamnose 3,5-epimerase/dTDP-4-dehydrorhamnose reductase-like	LOC107780668	34885	73602.4	138899	38023.6	5505.1	110895
A0A1S3YYM6	uncharacterized protein LOC107781097 isoform X3	LOC107781097	0	233960	0	0	0	0
A0A1S3YY25	60S acidic ribosomal protein P2A-like	LOC107780915	1428700	496722	1291645	1.03229e+06	356652	22545.1
A0A1S3YY32	photosystem II 5 kDa protein, chloroplastic	LOC107780887	0	1.11094e+06	0	1.51818e+06	1.12011e+06	56492.7
A0A1S3YY42	NADH dehydrogenase [ubiquinone] 1 alpha subcomplex subunit 9, mitochondrial-like	LOC107781003	0	83125	102256	0	76470.3	0
L0SQ48	Catalase	cat3	77035	69328.1	78497.4	78244.2	0	0
A0A1S4ASN2	photosynthetic NDH subunit of subcomplex B 1, chloroplastic-like	LOC107801003	2299700	2.42423e+06	2.56691e+06	2081161	2.6724e+06	2.54715e+06
[truncated: 3,641 more rows]

## Sheet: R_prot
Protein	Description	Gene	R_0h_1	R_0h_2	R_0h_3	R_24h_1	R_24h_2	R_24h_3
A0A1S4BQL5	3-ketoacyl-CoA synthase	LOC107810871	0	24197.1	0	31616.1	15368.1	0
A0A1S3Y8Q6	flavonoid 3-monooxygenase-like	LOC107773493	32675	30593	30048.5	33347.8	35408.5	21506
A0A1S4CU07	Cysteine proteinase inhibitor	LOC107822566	822340	2.30511e+06	924208	0	803198	2.06086e+06
A0A059TCI3	Cysteine proteinase inhibitor	LOC107784088	259840	349998	78271.9	48511.9	157514	102453
A0A1S3XED7	cysteine proteinase inhibitor 5-like	LOC107764160	0	275892	120172	343294	163874	221577
A0A059TCN3	Cystein protease inhibitor 3		0	46861.1	0	40527.6	26149.2	38208
F6N7C2	Zeta-carotene desaturase		92410	104872	96532.6	57376.8	66984.2	75469.6
A0A1S4C792	ras-related protein RHN1-like	LOC107815724	54840	36842.4	62469.1	48305.3	53568.4	0
A0A068BIS3	Tocopherol cyclase	TC	28675	230916	17296.1	184844	31436	187857
A0A1S4DMC7	Fructose-bisphosphatase	LOC107831320	58312	0	57099.4	78971.7	66129.3	0
A0A068JD99	Fructokinase (Fragment)	Frk1	468800	56883.1	825463	893504	310044	370368
A0A068JDA3	Endoglucanase	Cel3	1184500	1.04439e+06	1.28062e+06	1543869	0	885107
A0A068JFR6	Triosephosphate isomerase	LOC107804179	30439000	25351839	3.43299e+07	3.46403e+07	3.62244e+07	3.57003e+07
A0A1S3ZKG1	Expansin	LOC107787918	35788	55371.9	39737.5	72436.5	37910.6	40606.2
A0A075EYQ4	Ubiquitin-conjugating enzyme E2 35-like protein	Fni3	2199600	2.95247e+06	3.2257e+06	1.63533e+06	2930070	1.87413e+06
A0A075EYQ6	Eukaryotic translation initiation factor 5A	eIF-5A3	7374400	5.95009e+06	9.44528e+06	4.11517e+06	3.27348e+06	1.51804e+06
A0A075EYT4	Acyl-coenzyme A oxidase		2849800	3.72098e+06	2.92624e+06	3.05562e+06	3.97283e+06	2.70475e+06
A0A1S4B5M6	Malate dehydrogenase	LOC107804686	1073600	1.12248e+06	581937	506430	622050	1.10491e+06
A0A1S4B7R8	osmotin-like protein	LOC107805329	31741	28098.7	23638.4	24972	48020.7	0
Q40561	Proteinase inhibitor type-2		1507300	2.19434e+06	816436	1.37774e+06	1.51872e+06	1.11804e+06
A0A1S4DJY6	BRASSINOSTEROID INSENSITIVE 1-associated receptor kinase 1-like isoform X2	LOC107830517	168690	491115	189660	4327.8	156075	344299
A0A075F1U0	Constitutive plastid-lipid associated protein	CHRD	479820	473980	449615	500824	434594	554136
A0A1S4CB42	ubiquitin-conjugating enzyme E2 variant 1B-like isoform X2	LOC107817091	0	52068.4	49138.2	0	52614.9	42021.1
A0A075F2G1	Folate gamma-glutamyl hydrolase	GGH2	539650	1.07726e+06	343857	411199	607058	567737
A0A075F2G7	Cyclin dependent kinase C	CDKC	64991	62768.3	64678.6	59159.5	62443.4	59542.1
A0A075F2H4	Ubiquitin-conjugating enzyme E2 36-like protein	Ubc13-2	617950	419414	480289	639290	426692	441009
A0A075F933	Cysteine proteinase inhibitor	CYS3	1955700	2.55869e+06	1.91056e+06	1.84674e+06	1.96396e+06	2.69389e+06
A0A075F946	Cysteine protease inhibitor	CYS4	52066	82408.8	40570.4	63201.6	65254.8	0
A0A075F9G5	Cysteine protease inhibitor	CYS2	74777	353891	138656	133666	221684	313763
A0A075M5D0	Ribulose bisphosphate carboxylase small subunit (Fragment)	rbcS	7337.3	23532.2	0	0	0	0
A0A075QVP3	mRNA cap-binding protein	LOC107808007	274100	0	362641	235614	213937	0
A0A075QQ08	Eukaryotic translation initiation factor 4E-1	eIF4E	238470	232895	344137	288768	248339	236982
A0A075QRH1	mRNA cap-binding protein	nCBP2-T	213600	197936	234927	248438	243150	208930
A0A076FN11	Glucose-6-phosphate isomerase	GPI	413200	444608	380287	395414	440297	381750
A0A1S4DCD1	nuclear transcription factor Y subunit C-1-like	LOC107828294	133170	214950	199735	165667	227069	163422
A0A1S4DPL8	nuclear transcription factor Y subunit C-9-like isoform X2	LOC107832065	0	0	30236	41519.4	36893.3	24504.8
A0A1S3XT26	Alkaline/neutral invertase	LOC107768486	2226200	1601986	2.51197e+06	2.05997e+06	1691251	1.37117e+06
A0A076KWG3	Transaldolase	LOC107792012	3566900	3.54372e+06	3.19977e+06	3.3846e+06	3.41415e+06	2.94617e+06
A0A076KWG4	CLB1	LOC107779296	0	0	0	0	0	180254
A0A076KX83	Non-symbiotic hemoglobin class 1	LOC107773449	2653200	1.50609e+06	2.34898e+07	1.27742e+06	6.19266e+06	3.70633e+06
A0A1S4BTZ0	sialyltransferase-like protein 1 isoform X2	LOC107811803	119040	50639.2	44398.9	145399	61358.3	58846
A0A1S3ZMX9	Biotin carboxyl carrier protein of acetyl-CoA carboxylase	LOC107788710	168930	403044	162148	203636	209487	310901
A0A076KXA0	Ubiquitin receptor RAD23		27698	274011	260444	211194	0	198030
A0A1S4BT56	PHD finger protein Alfin1-like	LOC107811534	287460	366095	248883	365490	319662	267887
A0A1S3XH31	serine/threonine-protein kinase SAPK2-like isoform X2	LOC107765115	105420	90214.2	94845.8	90993.5	56418.9	85734.8
A0A076L1Z5	Remorin 2	LOC107810092	1086600	1139105	550325	992865	864635	1.2175e+06
A0A1S4B8P1	Peptide-methionine (S)-S-oxide reductase	LOC107805741	304930	758521	446363	463671	724426	426823
A0A076L203	Beta expansin		0	178285	26284.8	318340	44421.2	195621
A0A076L2D6	GAGA-binding transcriptional activator	LOC107776186	22140	27361.7	16285.6	19561.3	16392.6	16787.1
A0A1S3XFC3	Nascent polypeptide-associated complex subunit beta	LOC107764413	11605000	9.22799e+06	11568314	1.02172e+07	9217467	1.18652e+07
A0A076L2E2	40S ribosomal protein S25	LOC107768022	3402400	3201457	3.41433e+06	3.30335e+06	3191788	4.39612e+06
A0A1S4AQ81	remorin-like	LOC107800107	1274900	1.87536e+06	909794	2.21782e+06	1.40138e+06	954918
A0A076L2G1	Sulfurtransferase	LOC107787523	728790	448840	343019	461175	332403	620016
A0A1S4D890	30S ribosomal protein S15, chloroplastic	LOC107827027	13169000	1.09278e+07	1.45988e+07	1.26914e+07	11402766	1.34784e+07
A0A076L4P1	Spermidine synthase		62610	185109	120511	106471	141751	218394
A0A076L4P6	Importin subunit alpha		289630	280025	462124	380254	358616	384942
A0A076L4Q1	Glutamine--fructose-6-phosphate transaminase (isomerizing)		467190	393607	256853	169650	331314	400470
A0A076L4Q6	Aminoaldehyde dehydrogenase 2		40790	57310.6	38570.4	54314	51314	40068.8
A0A077D7Q3	Asparagine--tRNA ligase		2195100	2.61512e+06	2.51257e+06	2.71508e+06	2.20338e+06	2.83245e+06
A0A077D7R5	Cinnamoyl-CoA reductase	LOC107816628	40837	54807.6	49483.3	64725.6	30850.3	60316.6
A0A077D830	Superoxide dismutase copper chaperone		126490	199543	255716	117688	162302	0
A0A077D837	Glutathione synthetase	LOC107832748	472200	649597	1.01329e+06	999367	1.07749e+06	936962
A0A1S3YXL3	Eukaryotic translation initiation factor 5A	LOC107780536	31274	54217.1	64531	91959.2	48376.2	53174.1
A0A077D9P0	40S ribosomal protein S17	LOC107769059	4963000	3.90775e+06	7077051	5.15815e+06	5.41541e+06	3812397
A0A077D9R7	L-lactate dehydrogenase	LOC107806030	2398300	3.03415e+06	2.17052e+06	2.00005e+06	1.93848e+06	2.13378e+06
A0A077DBL0	Xyloglucan-specific fungal endoglucanase inhibitor protein		1394800	3.96538e+06	5.19033e+06	1.43754e+06	5.45631e+06	5.13606e+06
A0A077DBL2	20 kDa chaperonin, chloroplastic-like	LOC107831277	3050300	2.40243e+06	4.5148e+06	2.86963e+06	4.11422e+06	3.1908e+06
A0A1S4CES4	Threonine dehydratase	LOC107818180	750550	479962	903569	719746	519192	559831
A0A077DCK3	ATP-dependent Clp protease proteolytic subunit	LOC107771859	1032100	507540	304246	662757	681350	0
A0A1S3ZYK1	elongation factor 1-delta 1-like isoform X2	LOC107791787	14739000	1.11669e+07	1.93341e+07	1.86376e+07	1.55829e+07	2.13255e+07
A0A077DCM4	Metal transporter		66793	73037.4	41568.9	57090.8	42610.6	43321.7
A5A2I7	GNOM-like 1 protein		100790	116907	163694	97942.9	92900.1	157727
A0A097BTV9	V-type proton ATPase catalytic subunit A	LOC107818091	724150	182747	380407	138965	123255	823789
A0A1S4BSD0	betaine aldehyde dehydrogenase, chloroplastic-like isoform X2	LOC107811392	243600	0	0	219705	0	237964
A0A1S4DAN8	mitochondrial carnitine/acylcarnitine carrier-like protein	LOC107827620	1077100	813229	814381	747662	475305	729676
A0A1S3ZPH8	protein FATTY ACID EXPORT 1, chloroplastic-like	LOC107788922	28567	3421.4	36009.7	44912.3	57027.2	57331.9
A0A1S4BS96	ATP-dependent Clp protease proteolytic subunit	LOC107811365	318940	247395	276604	296223	287027	235867
A0A1S4BY15	60S ribosomal protein L2, mitochondrial-like	LOC107812987	453320	189352	430782	305211	358123	278437
A0A1S4DJ12	Succinate--CoA ligase [ADP-forming] subunit alpha, mitochondrial	LOC107830273	3672400	4023336	3.18271e+06	4.32e+06	4.84605e+06	4.11257e+06
A0A0A1CNP8	SBT1.5		122540	192873	83988.7	130908	48662.9	300690
A0A0A1ENJ0	Terpene cyclase/mutase family member	CAS1	513850	226815	521956	235456	468369	536784
A0A1S3XKW8	cell division topological specificity factor homolog, chloroplastic-like	LOC107766240	46195	46986.9	0	42986.6	39407.7	38423.4
A0A1S4CDK9	N-acyl-aliphatic-L-amino acid amidohydrolase	LOC107817856	83307	57979.9	594087	57591.3	105725	110255
A0A1S4BCD6	aquaporin PIP1-2 isoform X2	LOC107806766	742730	1.4852e+06	455471	1.1745e+06	683292	1.62846e+06
A0A0A8WJH9	Aquaporin PIP2 4b	LOC107824558	17366000	1.10138e+07	3.52476e+06	13090829	1.90519e+07	1.25131e+07
Q8W506	Aquaporin	NtPIP2;1	3061500	3.71967e+06	2.69113e+06	2.25345e+06	3.04886e+06	3.05999e+06
A0A0A8WH11	Aquaporin PIP2 10	LOC107794452	195040	400332	516629	528479	99035.6	370368
A0A0A8WHB3	Aquaporin PIP1 2b	LOC107779998	27281000	3.84838e+07	2.9851e+07	2.80597e+07	4.16355e+07	1.61609e+07
A0A0A8WK74	Aquaporin PIP2 3b	LOC107762778	4017800	4.63832e+06	3.76875e+06	3.43521e+06	3.19806e+06	1.30241e+06
A0A0A8WK75	Aquaporin PIP2 6b	LOC107815182	3466200	2.65459e+06	2.69103e+06	2.5385e+06	2.85465e+06	2162685
A0A0A8WHC1	Aquaporin PIP2 9a	LOC107764286	4556200	14566591	1.12411e+07	1.07338e+07	6006361	9.08296e+06
A0A6L1G3I3	Aquaporin PIP2-3t		713600	16809.4	250130	9000.3	0	113664
A0A0A8WK03	Aquaporin PIP1 2a	LOC107812756	807160	625562	432607	627568	810298	716887
A0A0A8WK06	Aquaporin PIP2 5	LOC107832439	3330600	3.1493e+06	3.05532e+06	2.41969e+06	3.79496e+06	2.24382e+06
A0A0A8WK73	Aquaporin PIP1 4	LOC107817177	1220400	1.26202e+06	830900	202104	1.01019e+06	161977
A0A0A8WK76	Aquaporin PIP2 9b	LOC107763243	15872000	1.62047e+07	1.24392e+07	1.19731e+07	1.04841e+07	1.10179e+07
Q9MB66	Thionin like protein	Nt-thionin	569010	1.64605e+06	450074	1.38613e+06	511475	1.26831e+06
A0A1S4BAR2	betaine aldehyde dehydrogenase, chloroplastic-like	LOC107806351	467790	492778	531981	656573	462184	468174
A0A0C4FSU3	DEF2 protein	DEF2	0	22156.6	0	24266.1	11573.3	23936.2
A0A0C4FSU4	BADH2 protein	BADH2	8723000	9.21913e+06	1.24781e+07	1.00292e+07	6.93301e+06	1.18397e+07
Q9ZR68	Aquaporin 1	aqp1	3367300	4.56987e+06	4.38712e+06	7.17976e+06	3642987	3.14802e+06
A0A0D3QSL6	50S ribosomal protein L22, chloroplastic	RPL17	1418800	1.31789e+06	2.11107e+06	624492	1.32606e+06	1.95054e+06
A0A0D4D9C3	Auxin efflux carrier component	PIN2S	0	0	97625.9	0	0	0
A0A0E3T7D4	NBS resistance protein RGA30 (Fragment)		298030	376669	263556	346448	307239	256090
A2V884	Translationally controlled tumor protein like protein (Fragment)	RsRG3-8	1820400	3.10392e+06	2.31546e+06	2288512	2.90829e+06	3.75053e+06
A0A0F7R4E4	Methyltransferase	GLMT1	1000100	780599	1.06825e+06	687393	1.06465e+06	1.72121e+06
A0A0H3U4Y9	Polygalacturonase inhibiting protein	PGIP2	199320	774738	829722	753404	242554	886071
A0A0H3U5M2	Polygalacturonase inhibiting protein	PGIP1	547250	893843	491780	1.45672e+06	638892	1.28607e+06
A0A1S4ADT6	Non-specific serine/threonine protein kinase	LOC107796379	43058	33911.8	38468.6	39022.8	37241.6	36660.9
A0A0K0XR34	WD-40 repeat containing protein	ATG18f	394580	334449	360746	352383	392392	287977
A0A1S4AA79	Phosphatidylinositol 3-kinase	LOC107795370	48109	0	15616.3	38791.3	0	32036.5
A0A1S3YW64	autophagy-related protein 3-like	LOC107780250	178350	203950	79325.3	170331	105910	29047.1
A0A1S4D5L9	Autophagy-related protein	LOC107826276	60063	0	52257.4	36720.4	129667	0
A0A0K0XR75	Sorting nexin 1-like protein	ATG20	381000	222824	571383	634013	245514	349692
A0A1S4CHQ3	vesicle transport v-SNARE 13-like	LOC107818974	233630	358779	304724	184356	162323	334334
A0A1S4ANR0	Serine/threonine-protein kinase TOR	LOC107799667	76325	12225.4	99429.4	14247.2	16982.4	58036.5
A0A0K2GN10	Glyceraldehyde-3-phosphate dehydrogenase	GAPC1	2594000	1479076	1.48322e+06	3.18578e+06	2.57474e+06	2000793
Q5MA11	Ribosomal protein S13	rps13	33265	21001.9	34421.6	18541.2	24986	29459.8
A0A6B9CU49	NADH dehydrogenase subunit 2	nad2	0	190937	0	0	182452	0
M4N7G5	Auxin efflux carrier component	PIN11T	154940	168509	146956	176277	191598	16637.9
A0A0R4WFQ1	Mannose-binding lectin	MBL2	206690	397664	133898	441918	232289	340294
A0A0R4WFW8	Mannose-binding lectin	MBL1	4043200	7.99462e+06	2.27346e+06	6.17491e+06	4.21071e+06	5.70438e+06
A0A0R4WSF0	Proteinase inhibitor	PI-2	9062400	1.37847e+07	7.16354e+06	1.19867e+07	7.83674e+06	4.582e+06
A0A1S4CUI3	subtilisin inhibitor-like	LOC107822839	189150	214655	0	92552.7	0	0
A0A0R4X9V9	Mannose-binding lectin	MBL3	85989	164092	56499.9	122443	131280	164206
A0A0S0N610	Tubulin beta chain	TUB1	1098500	797210	1.83655e+06	1.06027e+06	1.28855e+06	2.40316e+06
A0A1S3YYR6	Tubulin beta chain	LOC107781181	7110.4	0	8996	0	6229.8	8668.5
A0A139ZSG9	6-phosphogluconate dehydrogenase, decarboxylating	LOC107779182	9249400	9.59059e+06	8.42251e+06	1.04977e+07	10326917	9.9676e+06
P69556	Photosystem II protein D1	psbA	0	406872	102316	0	61386.1	78355.2
A0A140G1P7	ATP synthase subunit alpha	atpA	310840	655677	328745	251887	285650	217364
P69686	Photosystem II D2 protein	psbD	0	176404	10916.9	0	0	0
A0A140G1Q8	Photosystem II CP43 reaction center protein	psbC	19315	229658	0	0	63339.5	1223.8
Q15B79	Photosystem I	psaB	0	152096	0	0	0	0
A0A140G1S2	ATP synthase subunit beta	atpB	744770	1.01428e+06	521996	605190	491376	811226
P00876	Ribulose bisphosphate carboxylase large chain	rbcL	223550	2478759	149250	632822	213372	688428
A0A140G1S4	Acetyl-coenzyme A carboxylase carboxyl transferase subunit beta	accD	2525300	1.35846e+06	3.05143e+06	2.14939e+06	2.28312e+06	1.82776e+06
P60139	Photosystem II reaction center protein L	psbL	3097.4	21168.1	0	0	1765.2	0
A0A140G1T3	Cytochrome b559 subunit alpha	psbE	0	205852	0	7977.7	845.3	9433
P69660	30S ribosomal protein S18, chloroplastic	rps18	23869	31899.8	23476.8	0	26707.2	28512.5
P12210	ATP-dependent Clp protease proteolytic subunit	clpP	507820	605551	593139	908188	553708	862543
P06411	Photosystem II CP47 reaction center protein	psbB	37707	221676	46560.5	0	55517.7	77658.1
P06247	Cytochrome b6	petB	0	52663.2	0	0	0	0
P06363	30S ribosomal protein S8, chloroplastic	rps8	97261	6044.5	117898	74944.3	124653	93363.7
P06382	50S ribosomal protein L14, chloroplastic	rpl14	34428	55282.2	0	0	0	46242.2
P06357	30S ribosomal protein S3, chloroplastic	rps3	78215	160614	74143.1	70640.1	39240.2	137183
P62732	30S ribosomal protein S7, chloroplastic	rps7-A	0	13515.7	19334.1	0	14038.4	0
P12222	Protein TIC 214	TIC214	863740	547212	697441	717295	1.01953e+06	791476
A0A140G1Y2	Protein Ycf2	ycf2	380290	324356	132631	176152	134558	130638
Q5MA56	Ribosomal_L2 domain-containing protein	orf133	68863	0	62493	57350.7	69883.9	68254.4
A0A1S3ZTZ5	GTP-binding protein SAR1A-like	LOC107790375	5897800	5.44336e+06	4.42034e+06	4.58031e+06	5.78256e+06	3.39208e+06
X5CLZ0	diacylglycerol kinase		419140	212140	285342	315242	164398	157953
A0A1S3XJN0	eukaryotic translation initiation factor 2 subunit alpha-like	LOC107765718	2525100	2.61829e+06	2.56344e+06	1947397	2.74069e+06	2.92209e+06
A0A1S3Y917	E3 ubiquitin-protein ligase HOS1-like	LOC107773921	270630	91253.1	267207	265743	246767	215060
A0A1S4D0F2	nuclear pore complex protein NUP96-like isoform X2	LOC107824484	38195	28038.6	34981.3	32252.7	34334.7	33987.9
A0A1S4C171	delta(12)-fatty-acid desaturase FAD2-like	LOC107814090	0	43336.7	50344.2	59788.2	25112.4	38938.2
A0A1S4CWQ4	heparan-alpha-glucosaminide N-acetyltransferase-like	LOC107823441	47628	50068.4	29561.7	53467.5	47349.7	36691.1
A0A1S3WX42	CAAX prenyl protease	LOC107758921	557710	437818	530245	362142	447798	530825
A0A1S4D952	acyl-protein thioesterase 2-like isoform X2	LOC107827345	287660	33771.8	268594	23222.2	270976	268425
A0A1S3WX93	Nucleolar protein 10	LOC107758953	100690	96288.7	138995	103288	130592	116923
A0A1S3WXA0	uncharacterized protein LOC107758913	LOC107758913	427120	355958	713910	414047	418235	689581
A0A1S4B200	transcription factor MYB1R1-like	LOC107803698	62371	61948.2	58480	55720	65870.3	59278.6
A0A1S4DNI9	Protein-serine/threonine phosphatase	LOC107831691	478660	380770	386372	263950	593710	633466
A0A1S4CN25	uncharacterized protein LOC107820817	LOC107820817	2476700	1.03124e+06	366132	705096	1.01941e+06	951328
A0A1S3WXG3	NADH--cytochrome b5 reductase 1-like	LOC107759015	2860600	2.41993e+06	2.23216e+06	2.3288e+06	2.1183e+06	2.99321e+06
A0A1S3WY07	enoyl-CoA hydratase 2, peroxisomal-like isoform X2	LOC107759031	0	786154	0	0	800197	689477
A0A1S3WXM5	uncharacterized protein LOC107759019 isoform X2	LOC107759019	12294	12049.3	11173.3	7591.9	13008.8	16448
A0A1S3WXH3	extensin-2-like	LOC107759023	379870	872760	343059	1.88623e+06	505043	657420
A0A1S3XD47	uncharacterized protein LOC107763776	LOC107763776	40497	39791.6	41690.6	42721.1	37930.1	14313.4
A0A1S4BPD1	serine/threonine-protein kinase tricorner-like	LOC107810446	116620	79338.2	120322	76343.5	141227	126642
A0A1S3Y714	casein kinase I-like isoform X2	LOC107772994	33380	32606.2	37453.1	35151	32122.4	44300.2
A0A1S3WXJ7	Peptidyl-prolyl cis-trans isomerase	LOC107759056	17263	134272	228104	174620	199756	140857
A0A1S4AGK6	Transmembrane 9 superfamily member	LOC107797386	656610	480158	945296	421673	739171	754139
A0A1S3WXM7	uncharacterized protein LOC107759083	LOC107759083	81800	421251	161978	353416	113103	121372
A0A1S3WXN6	WD-40 repeat-containing protein MSI4-like	LOC107759085	612980	652462	833364	637372	699805	795094
A0A1S3WXP0	Serine hydroxymethyltransferase	LOC107759094	712630	701976	855030	1.2772e+06	1.00056e+06	823345
A0A1S3WXP3	geraniol 8-hydroxylase-like	LOC107759080	36079	0	0	105714	43075.1	13937.5
A0A1S3WXS1	14-3-3 protein 9-like isoform X2	LOC107759102	0	201161	0	0	0	0
A0A1S3WXT2	serine carboxypeptidase-like 18	LOC107759062	296740	0	120312	320973	434686	0
A0A1S3WXV2	bifunctional monothiol glutaredoxin-S16, chloroplastic-like	LOC107758982	39520	44970.4	36221.2	29802.7	30246	75008.7
A0A1S4BC35	uncharacterized protein LOC107806722 isoform X2	LOC107806722	53704	45685.6	50767.1	53845.3	0	0
A0A1S3WXW3	SPX domain-containing membrane protein At4g22990-like isoform X2	LOC107759148	116540	108883	138586	85065.4	113524	89122.8
A0A1S4BC12	translation initiation factor eIF-2B subunit beta-like	LOC107806721	57377	5579.2	39077.1	8545.1	41903.6	50726.8
A0A1S3WXX4	Transmembrane 9 superfamily member	LOC107759103	293890	34751.6	134606	101211	218818	229822
A0A1S4D1H7	probable ubiquitin-conjugating enzyme E2 18	LOC107824880	231350	288948	328266	241606	312500	96804.6
A0A1S3WXY4	Beta-glucosidase	LOC107759116	2547400	3.3376e+06	2.64694e+06	3.17285e+06	2.32268e+06	2197727
A0A1S3WXY6	Serine/threonine-protein phosphatase	LOC107759017	366020	566184	637778	480284	408031	582008
A0A1S3WXZ7	Exocyst complex component Sec8	LOC107758906	682820	657099	586576	609888	586137	644867
A0A1S3XXD2	KH domain-containing protein At5g56140-like isoform X2	LOC107769786	57345	105842	37822.2	195591	21063.8	175805
A0A1S3ZW93	60S ribosomal protein L21-2-like	LOC107791104	0	1.55989e+06	1.6932e+06	1.65894e+06	1.4208e+06	1.11029e+06
A0A1S3WY30	vacuolar-sorting receptor 1-like	LOC107759156	3434500	3.18363e+06	3.28845e+06	3.19781e+06	1.80891e+06	2.85323e+06
A0A1S3WY34	probable methionine--tRNA ligase	LOC107759049	1271900	1.36819e+06	856875	163023	816895	781521
A0A1S3WY43	H/ACA ribonucleoprotein complex subunit 4-like	LOC107759237	3322400	3106650	4.17884e+06	3.68872e+06	2.92247e+06	1.4881e+06
A0A1S3WY47	uncharacterized protein LOC107759179 isoform X2	LOC107759179	410880	372853	392976	0	19584.2	0
A0A1S3WY66	Transcription elongation factor 1 homolog	LOC107759182	61608	0	157779	70839.8	60843.5	60659.5
A0A1S3WY68	haloacid dehalogenase-like hydrolase domain-containing protein 3	LOC107759253	171110	194742	339079	381615	375694	425094
A0A1S3WY70	protein OS-9 homolog	LOC107759084	161090	24168.7	145529	206519	20848	0
A0A1S3X9E5	Serine/threonine-protein phosphatase	LOC107762541	24260	72247.9	118426	1.04913e+06	86544.7	98580.4
Q94FM7	5-epiaristolochene 1,3-dihydroxylase	CYP71D20	79376	0	91707.6	0	184302	112285
A0A1S3WY84	bifunctional epoxide hydrolase 2-like	LOC107759209	0	147098	0	125734	172403	0
A0A1S3WY89	malignant T-cell-amplified sequence 1 homolog	LOC107759207	496690	319413	620402	387312	500943	449501
A0A1S3WY97	AATF-Che1 domain-containing protein	LOC107759224	111480	37271.1	86454.6	49870.2	109825	0
A0A1S3WY98	KH domain-containing protein At4g18375-like	LOC107759303	42007	88385.9	113389	103655	65765.5	150879
A0A1S3WYA8	20 kDa chaperonin, chloroplastic-like	LOC107759119	2451200	1.81981e+06	2.7004e+06	2.89709e+06	2.74655e+06	2.82395e+06
A0A1S3WYB2	ALA-interacting subunit	LOC107759228	30711	31753.2	27280.4	6701.1	55953.4	49981.6
A0A1S3WYC1	Fumarate hydratase	LOC107759249	709290	565758	512290	542062	484204	502498
A0A1S3WYG1	60S ribosomal protein L22-3-like	LOC107759189	0	2060.6	0	59798.4	0	0
A0A1S3YK10	L-ascorbate peroxidase 1, cytosolic-like	LOC107776943	10288000	8.70223e+06	1.24641e+07	8.93651e+06	7.83993e+06	1.1272e+07
A0A1S3WYH5	Inositol-3-phosphate synthase	LOC107759316	51560	0	0	0	46378.6	78607.4
A0A1S3WYI1	tRNA (guanine-N(7)-)-methyltransferase non-catalytic subunit	LOC107759320	24057	22836.8	28225	17329.2	23690.3	28470.9
A0A1S3WYJ4	NADH dehydrogenase [ubiquinone] 1 beta subcomplex subunit 9	LOC107759370	356360	626754	361484	363379	493575	26738.6
A0A1S4CSE2	desumoylating isopeptidase 1-like	LOC107822016	43167	37178.1	65463.7	57375.6	42513	60276
A0A1S3WYM7	vacuolar protein sorting-associated protein 8 homolog isoform X6	LOC107759344	153400	0	104391	0	0	0
A0A1S3WYL9	Werner Syndrome-like exonuclease	LOC107759394	104270	0	105199	158393	94398.3	0
A0A1S3WYM6	actin-101	LOC107759349	1121500	1.27262e+06	752055	252387	953447	1.16441e+06
A0A1S3WYP8	binding partner of ACD11 1-like isoform X2	LOC107759357	0	19735.6	0	15117.5	0	21259.4
A0A1S4CPJ5	NAP1-related protein 2-like	LOC107821085	507820	226837	287188	356730	1.21662e+06	475135
A0A1S3WYR5	extensin-like isoform X2	LOC107759431	1816400	2.35388e+06	1.06965e+06	2.61544e+06	1.54955e+06	2.33034e+06
A0A1S3YQ42	FACT complex subunit	LOC107778561	466220	427200	192902	496943	447027	151370
A0A1S3WYS6	uncharacterized protein At2g27730, mitochondrial-like	LOC107759442	644810	620893	510843	561172	476631	465426
A0A1S4CQF3	probable ribosomal protein S11, mitochondrial	LOC107821542	307860	285777	188293	79387	245462	232240
A0A1S3WYU5	Endoplasmic reticulum transmembrane protein	LOC107759328	909780	982756	527442	159369	810946	430289
A0A1S3WYW3	carbon catabolite repressor protein 4 homolog 1-like	LOC107759403	86330	60683	106306	69811.7	68156.6	87885.5
A0A1S3WYW8	intracellular ribonuclease LX-like	LOC107759406	318700	233507	260125	251263	274141	261653
A0A1S3WYX0	Catalase	LOC107759410	1981200	0	0	0	0	0
A0A1S3WYY0	protein SUPPRESSOR OF K(+) TRANSPORT GROWTH DEFECT 1-like isoform X1	LOC107759416	18990	0	11606.2	15081.2	14298.4	0
A0A1S3WZ88	CD2 antigen cytoplasmic tail-binding protein 2-like isoform X2	LOC107759438	2328900	112861	76670.9	128809	83027.4	97966.4
A0A1S3WZ01	glycine-rich RNA-binding protein 2, mitochondrial-like	LOC107759364	0	156054	359668	0	0	0
A0A1S3WZ09	60S ribosomal protein L30-like	LOC107759448	2348700	45637.5	862950	38436.2	639221	55397.5
A0A1S4C071	protein FMP32, mitochondrial-like	LOC107813696	343400	289188	319817	251240	300621	281658
A0A1S3WZ18	calcium-dependent protein kinase 21-like	LOC107759366	1177800	1664972	679834	298141	491160	4.53572e+06
A0A1S3YTD9	uncharacterized protein YKR070W-like	LOC107779499	75611	97673	93537.1	70016	115980	134047
A0A1S3ZLQ4	putative clathrin assembly protein At2g25430	LOC107788165	20082	23200.9	20734.6	37601	21557.1	25143.3
A0A1S3YWM6	Phospholipase D	LOC107780667	1936100	923870	1.19554e+06	2.79689e+06	1.37415e+06	1.54733e+06
A0A1S3WZ50	cell division control protein 2 homolog D-like	LOC107759402	254460	0	281382	0	19516.3	245256
A0A1S3WZ56	bifunctional dTDP-4-dehydrorhamnose 3,5-epimerase/dTDP-4-dehydrorhamnose reductase	LOC107759475	5267200	3.35914e+06	6.80333e+06	3.22698e+06	3.43244e+06	4.6381e+06
A0A1S4BJJ3	protein RRP6-like 3 isoform X2	LOC107809017	0	0	6703.2	0	4830.2	6079.2
A0A1S4A4R1	Protein TIC 20	LOC107793677	514190	100163	72973	132213	656926	0
A0A1S3WZ84	protein PLANT CADMIUM RESISTANCE 8-like	LOC107759503	41879	47908.7	33628.6	33574.8	55852.7	45647.1
A0A1S3ZY47	uncharacterized protein LOC107791688	LOC107791688	45019	24727.4	67586.4	24073.2	30229.6	71565
A0A1S3WZ87	protein STRICTOSIDINE SYNTHASE-LIKE 6-like	LOC107759420	1485500	768111	1019472	1.36094e+06	794464	1.15298e+06
A0A1S4CA74	Snurportin-1	LOC107816800	41753	0	55421.6	23726	47806.9	43635.3
A0A1S3WZ92	Reticulon-like protein	LOC107759445	108490	181653	122875	193650	33764.4	117764
A0A1S3WZ99	CBS domain-containing protein CBSCBSPB1-like	LOC107759513	41564	28081.2	76496.3	118278	46733.2	116470
A0A1S3WZT7	transcriptional corepressor LEUNIG-like isoform X5	LOC107759584	0	23469.9	20179	18304	20093.8	21119.6
A0A1S4C1K4	ATP synthase subunit O, mitochondrial-like	LOC107814191	5044400	8.97582e+06	8.19837e+06	5.69966e+06	4.44376e+06	7783947
A0A1S4DAS5	Ubiquitin carboxyl-terminal hydrolase	LOC107827849	370180	332798	402682	744779	744822	397013
A0A1S3WZB9	Phosphoenolpyruvate carboxylase	LOC107759530	264090	129919	218069	466304	362500	285918
A0A1S3WZC2	BRCT domain-containing protein At4g02110-like	LOC107759454	65893	0	0	0	86769.7	0
A0A1S3WZD6	6,7-dimethyl-8-ribityllumazine synthase	LOC107759548	2736000	2.03447e+06	706428	1.33314e+06	1.54205e+06	854760
A0A1S3WZD9	Procollagen-proline 4-dioxygenase	LOC107759623	138280	110630	106266	72758.7	98210.5	130959
A0A1S3WZE1	Peroxidase	LOC107759554	3079200	3.69507e+06	2.61113e+06	3.7096e+06	3.41251e+06	3.38339e+06
A0A1S3WZE3	coatomer subunit beta-1-like	LOC107759478	809060	603167	874082	734793	742736	492817
A0A1S4A4N4	probable membrane-associated 30 kDa protein, chloroplastic	LOC107793675	136710	240068	429335	289369	356006	285389
A0A1S3WZJ1	Purple acid phosphatase	LOC107759506	128160	149920	104960	53820.4	0	0
A0A1S3XUW8	COP9 signalosome complex subunit 8	LOC107768852	317380	371956	256773	206065	130078	224637
A0A1S3WZM4	uncharacterized protein LOC107759628	LOC107759628	240040	160341	210747	244500	153198	114826
A0A1S3Z0N9	protein DETOXIFICATION 40-like	LOC107781496	48121	38946.3	48396	37165.2	0	35946.8
A0A1S3WZP7	UDP-D-apiose/UDP-D-xylose synthase 2-like	LOC107759642	217480	0	244693	0	276206	295193
A0A1S3WZQ8	Aconitate hydratase	LOC107759563	0	2.83174e+06	2537807	2.42208e+06	2.64924e+06	2.5933e+06
A0A1S3WZR6	probable sugar phosphate/phosphate translocator At3g11320	LOC107759654	0	39551	95570	50688.4	42322.9	0
A0A1S3WZS5	LOW QUALITY PROTEIN: cyclic nucleotide-gated ion channel 1-like	LOC107759666	14941	12785.3	10500	9761.7	15564.4	9907.2
A0A1S3ZF55	ethylene receptor 1-like	LOC107785993	46973	30442.1	37081.1	31661.5	43987.5	54001.5
A0A1S3WZS7	uncharacterized protein LOC107759599	LOC107759599	65660	63756.9	81147.8	71782.8	61066.5	278305
A0A1S3WZT9	E3 ubiquitin-protein ligase RNF25-like	LOC107759680	11388	9617.7	11005.7	8479.6	12928.7	13741
A0A1S3WZV3	serine/threonine-protein kinase HT1-like	LOC107759757	22276	178712	107484	175880	238896	127152
A0A1S3WZX1	elongation factor 1-beta-like	LOC107759618	1328000	4.0872e+06	4.47401e+06	29753.9	3.95413e+06	1.60995e+06
A0A1S3WZY2	protein GPR107-like	LOC107759704	361080	290096	0	363368	313640	375072
A0A1S3X056	polyadenylate-binding protein-interacting protein 6-like isoform X2	LOC107759782	12101	12731.7	13059.6	13204.3	13732.2	13792
A0A1S3WZY6	Patatin	LOC107759644	44314	125633	25733.2	42533.8	186655	52459.1
A0A1S3WZY8	Diphosphomevalonate decarboxylase	LOC107759723	560880	428939	196622	556621	459707	489435
A0A1S3WZZ3	alpha-glucosidase-like	LOC107759721	365280	455587	299328	682207	540123	487612
A0A1S3X008	uncharacterized protein LOC107759739	LOC107759739	65055	0	0	293216	0	135870
A0A1S3X014	myricetin O-methyltransferase-like	LOC107759650	13333	0	0	283820	0	131422
A0A1S3X034	Alkaline/neutral invertase	LOC107759825	33105	68150.6	183635	235342	217533	164914
A0A1S3X040	Adenine phosphoribosyltransferase	LOC107759759	811680	746886	763038	719190	693136	766182
A0A1S3X050	ras-related protein RABE1a-like	LOC107759767	37149	28446.5	30909.4	27827.1	30863.6	28199.8
A0A1S3X073	phosphoglycolate phosphatase 1B, chloroplastic-like	LOC107759700	40711	38643.4	30311.8	34161.4	35653	47941.4
A0A1S3X075	frataxin, mitochondrial-like isoform X2	LOC107759791	32359	32198.3	34383.7	39321.3	1351.6	77089.5
A0A1S3X076	Short-chain dehydrogenase/reductase	LOC107759800	581050	661079	515502	602512	683036	460108
A0A1S3X077	DEAD-box ATP-dependent RNA helicase 56-like	LOC107759702	125400	90946.9	91558	88886.2	119648	81738.5
A0A1S4DLN1	protein trichome birefringence-like 33	LOC107831107	0	8447.2	6596.9	6224.2	0	15831.2
A0A1S3X083	uncharacterized protein YnbD-like	LOC107759724	18664	173922	20785.5	15791.6	22404.8	22337.1
A0A1S3X086	Homoserine dehydrogenase	LOC107759801	12272	170849	94664.3	132327	111017	0
A0A1S4DNY4	xylulose 5-phosphate/phosphate translocator, chloroplastic-like	LOC107831852	113120	136830	94718.1	118868	116699	134463
A0A1S3X0C4	serine/threonine-protein phosphatase 2A 65 kDa regulatory subunit A beta isoform-like	LOC107759848	1555000	1.35595e+06	1.43434e+06	709851	1.44823e+06	1.46902e+06
A0A1S3X0E5	UBP1-associated protein 2C-like	LOC107759935	1425200	583079	1.40641e+06	883733	885495	1.02925e+06
A0A1S3Z9V1	Dirigent protein	LOC107784526	0	37427.4	24690.8	27130.3	29041.8	48345.6
A0A1S3X0G8	subtilisin-like protease SBT1.8	LOC107759898	1240100	1.10214e+06	1.70527e+06	1.58597e+06	1.10924e+06	1.49046e+06
A0A1S3X0G9	ATP-dependent DNA helicase	LOC107759901	400490	237706	0	0	0	0
A0A1S3X0H2	Transcription elongation factor SPT5	LOC107759904	229680	305613	127284	211796	417968	300445
O49903	ACC oxidase	TEFE	72542	75577.7	85599.7	0	51449.6	56006.7
A0A1S3X0H8	60S ribosomal protein L27	LOC107759969	18015	3806.7	29527.8	0	11607.2	36214.1
A0A1S3X0I0	protein GLC8-like isoform X2	LOC107759914	0	0	0	0	37490.3	102132
A0A1S3X0I4	Ribosomal protein L19	LOC107759916	453020	504237	922572	104576	351115	380229
A0A1S4DNY8	transmembrane ascorbate ferrireductase 1-like	LOC107831840	105100	156306	80763.7	155090	118169	114373
A0A1S3X0J2	glutathione S-transferase L3-like isoform X1	LOC107759987	2562500	2.92174e+06	3.27159e+06	4.50542e+06	2.65058e+06	3.826e+06
A0A1S3X0J3	diacylglycerol kinase	LOC107759925	2808000	2034905	1.60183e+06	2.17628e+06	2.1817e+06	1.08677e+06
A0A1S3X0L3	LOW QUALITY PROTEIN: G-type lectin S-receptor-like serine/threonine-protein kinase At2g19130	LOC107760015	56646	75023.2	40209.3	83249.8	23501.2	111388
A0A1S3X0M2	protein LIGHT-DEPENDENT SHORT HYPOCOTYLS 5-like	LOC107759951	89951	111877	71005.9	140282	98797.3	104729
A0A1S3X196	ras-related protein Rab7-like isoform X2	LOC107759954	67562	41943.6	0	196760	4771	128494
A0A1S3X0M4	Purple acid phosphatase	LOC107760026	291180	408009	345264	300150	423476	542593
A0A1S3X0M5	60S ribosomal protein L4-like	LOC107759872	0	0	80513.4	182790	0	52265.4
A0A1S4C5I3	Beta-ketoacyl-[acyl-carrier-protein] synthase III	LOC107815403	747640	463340	1.26257e+06	749704	856518	632815
A0A1S3X0N1	gamma aminobutyrate transaminase 3, chloroplastic-like	LOC107759965	953590	30040.8	976628	17619.7	0	871978
A0A1S3X0Q7	fasciclin-like arabinogalactan protein 4	LOC107759994	7050.1	0	55301.9	41851.8	36723.7	45298.6
A0A1S4BF20	Dirigent protein	LOC107807552	4181.8	734300	591633	800565	465728	697968
A0A1S4BBC6	ubiquitin-conjugating enzyme E2 28-like isoform X2	LOC107806522	1312300	1.48093e+06	1662278	1.79091e+06	1.5551e+06	1.47205e+06
I1Z1X7	Glycosyltransferase (Fragment)	IRX10	215690	88675.7	105878	141087	91981.5	138449
A0A1S3X0T3	glycine-rich RNA-binding protein-like isoform X1	LOC107760024	6367300	6.5443e+06	7.44863e+06	6.66581e+06	7.25063e+06	8.55251e+06
A0A1S3YY28	protein LHCP TRANSLOCATION DEFECT-like	LOC107781119	0	18364.3	14939	26181.7	12845.5	19136.1
A0A1S4D2K5	vesicle-associated membrane protein 722	LOC107825240	0	0	7954.2	0	0	212150
A0A1S4CNC5	cytochrome c1-2, heme protein, mitochondrial-like	LOC107820652	5567200	4.98048e+06	5.75104e+06	5.7168e+06	5.48529e+06	4.76448e+06
A0A1S4ATM5	Hexosyltransferase	LOC107801096	0	0	0	0	0	216505
A0A1S3X0Y0	Glutathione transferase	LOC107760143	26429	26446.4	23865.8	11476	30328.3	14352.1
A0A1S3Y5Z1	Ferredoxin--NADP reductase, chloroplastic	LOC107772606	50195	136623	0	72203.8	24152.7	0
A0A1S3X0Y6	U1 small nuclear ribonucleoprotein A-like	LOC107760078	64201	49399.1	55865.5	63113.1	70074	55305.9
A0A1S4A9V8	mitogen-activated protein kinase kinase kinase 1-like	LOC107795279	18250	15204.1	19444.8	16739.1	18492.9	17388.8
A0A1S4A5K4	chromophore lyase CRL, chloroplastic-like isoform X2	LOC107793916	30129	25009.6	24214	27275.6	18560.7	27772.9
A0A1S3X106	microtubule-associated protein TORTIFOLIA1-like	LOC107760096	130850	155693	55690.9	159607	101037	93121.9
A0A1S3X119	5-3 exoribonuclease 2-like	LOC107760109	385360	335028	404407	456307	376023	370718
A0A1S3X130	stress protein DDR48-like	LOC107760194	433990	733119	305772	1.40055e+06	320792	513918
A0A1S4AQR4	probable sodium-coupled neutral amino acid transporter 6	LOC107800438	627720	128618	112840	108084	111038	1.03369e+06
A0A1S3X155	WPP domain-interacting tail-anchored protein 1-like isoform X2	LOC107760214	228130	212840	154726	54154	226082	136465
A0A1S3X170	Pescadillo homolog	LOC107760163	116160	88548.8	241252	102526	115816	116829
A0A1S3Z511	abscisic stress-ripening protein 2-like	LOC107782875	20242	182506	0	223314	15795.6	130298
A0A1S3X1A5	Vacuolar protein sorting-associated protein	LOC107760095	21525	17139.6	17169.4	17654.9	16970.1	16828.6
A0A1S3X1A6	myosin-9-like	LOC107759966	3627100	4.18517e+06	3.94781e+06	3.44236e+06	3.10177e+06	2.64874e+06
A0A1S3XFP3	ATP-dependent 6-phosphofructokinase	LOC107764603	51072	96693.3	0	2627.5	0	0
B7X6S7	Syntaxin	NtSYP41	65914	0	68521.1	152049	77963.6	132196
A0A1S3X1K1	uncharacterized protein LOC107760286 isoform X1	LOC107760286	310940	351136	372756	448352	323957	410180
A0A1S3X1D8	acid phosphatase 1-like	LOC107759996	506820	793918	70598.9	1.65338e+06	837939	1.10472e+06
A0A1S3X1E5	Pyruvate dehydrogenase E1 component subunit alpha	LOC107760137	187190	155201	152532	161162	171273	171214
A0A1S3ZIJ0	protein EXORDIUM-like 3	LOC107787087	0	161675	26076.3	26519.8	26704.1	127114
A0A1S3X1F5	cold shock domain-containing protein 3-like	LOC107760151	262260	238297	272534	255144	43820	308369
A0A1S3YJT0	V-type proton ATPase subunit E-like	LOC107777047	3719200	3.2628e+06	3.92616e+06	4.92937e+06	4.15789e+06	4.71555e+06
A0A1S3X1G0	LOW QUALITY PROTEIN: vacuolar protein sorting-associated protein 53 A	LOC107760155	508700	236154	589598	338687	521895	222635
A0A1S3XQH5	uncharacterized protein LOC107767647	LOC107767647	44213	44687.2	33652.6	34074.1	40749.7	36159.4
A0A1S3XI75	4-hydroxy-3-methylbut-2-enyl diphosphate reductase, chloroplastic-like	LOC107765472	37881	261884	229810	156952	69936.3	211045
A0A1S4ATU1	zinc finger CCCH domain-containing protein 37-like	LOC107801231	48473	42404	60776.3	41309.4	43715.2	71254.2
A0A1S3X1J0	uncharacterized protein LOC107760054	LOC107760054	204190	65639.9	204323	71123.5	187210	108422
A0A1S3X1J4	plastid lipid-associated protein 3, chloroplastic-like	LOC107760189	0	42197.3	19969.5	35187.3	29954.2	0
A0A1S3X1J8	probable L-cysteine desulfhydrase, chloroplastic	LOC107760273	15251	16730.6	11715.9	9054	13355.1	12569.8
A0A1S3X1L8	AP-5 complex subunit mu-like	LOC107760083	70248	0	75368.1	0	0	0
A0A1S3X1L9	Fructose-bisphosphatase	LOC107760211	95492	111155	22307.7	115226	51175.3	96124.6
A0A1S3Z0K1	glucan endo-1,3-beta-glucosidase 11-like	LOC107781457	0	28762.5	0	38645	0	30405.3
A0A1S3X1P1	somatic embryogenesis receptor kinase 2	LOC107760318	52141	53586.2	41942	61271.3	49662.7	70831.1
A0A1S3X263	AMSH-like ubiquitin thioesterase 1 isoform X3	LOC107760387	1696900	1.62561e+06	1.37419e+06	1.88169e+06	1.71838e+06	1.04304e+06
Q5F4N7	Putative beta-(1,2)-xylosyltransferase	xylt	25242	33341	13051.6	34737.9	25623.1	28558.7
A0A1S3X1Q2	40S ribosomal protein S7	LOC107760389	631130	531542	736414	585422	512976	519745
A0A1S3X1Q4	1,3-beta-glucan synthase	LOC107760121	1619500	1.87471e+06	1.59734e+06	2.1764e+06	1.43313e+06	1.44418e+06
A0A1S3X1S5	Pyruvate dehydrogenase E1 component subunit alpha	LOC107760338	337950	546064	403320	174109	215160	174388
A0A1S3X1T2	Germin-like protein	LOC107760268	0	81950.6	6381.6	145036	0	37344.7
A0A1S4A3G4	KH domain-containing protein At4g18375-like	LOC107793339	95081	21814.3	19921.6	31705.8	26426.6	20897.7
A0A1S4CIV7	serine/threonine-protein kinase HT1-like	LOC107819507	68482	114140	20250.8	80239.2	29482.6	61478.4
A0A1S3X209	organic cation/carnitine transporter 7-like	LOC107760340	58731	45822.3	54932.8	58846.3	57999.3	64352.6
A0A1S4BN82	Mannan endo-1,4-beta-mannosidase	LOC107810100	7547.5	0	0	0	2287.3	12635.9
A0A1S3X220	Ubiquitinyl hydrolase 1	LOC107760236	96677	96882.4	90664.2	14292.6	89690	65398.2
A0A1S3X231	probable uridine nucleosidase 1	LOC107760420	444140	355728	527801	372412	142686	367412
A0A1S3X235	uncharacterized protein LOC107760252	LOC107760252	42997	27942.4	31040	21364.5	40576	56672.6
A0A1S3X240	guanylate-binding protein 5-like	LOC107760512	1825700	2.62999e+06	1.65759e+06	3.05801e+06	2.71901e+06	1.58189e+06
A0A1S3X241	phospholipase A-2-activating protein-like	LOC107760255	2525500	2.43174e+06	3.08156e+06	3082745	2.69918e+06	3.3168e+06
A0A1S4A5R5	nephrocystin-3-like	LOC107794015	982840	852442	947311	1.51334e+06	1.13668e+06	2.1624e+06
A0A1S3X265	putative oligosaccharyltransferase complex subunit CG9662	LOC107760274	79748	60362.6	72583	51230.8	53600.3	116120
A0A1S3X2N7	sister chromatid cohesion 1 protein 4-like isoform X2	LOC107760537	171310	75303.2	114047	100349	252152	192202
A0A1S4AH37	probable leucine-rich repeat receptor-like protein kinase At1g35710	LOC107797612	209080	154326	281093	61659.4	202305	325446
A0A1S3X2V5	AT-hook motif nuclear-localized protein	LOC107760482	31601	37261.2	21542.6	22001.1	28072.8	19478
A0A1S3X298	Lipoxygenase	LOC107760301	4132800	6.01789e+06	2.40174e+06	3.4116e+06	3.59079e+06	5.99444e+06
A0A1S3X2A9	Conserved oligomeric Golgi complex subunit 2	LOC107760573	54505	41144.3	50366.1	46967.4	48111.1	83767.3
A0A1S3X2B3	uncharacterized protein LOC107760317	LOC107760317	30064	32967	33558.8	25799.2	32146	30605.5
A0A1S3X2B9	Oxoglutarate dehydrogenase (succinyl-transferring)	LOC107760583	16375000	1.36502e+07	16491107	1.04723e+07	1.59672e+07	1.49764e+07
A0A1S3X2C4	DEAD-box ATP-dependent RNA helicase 31-like	LOC107760327	122810	35903.1	419470	91181.9	118580	133566
A0A1S3X2C7	NAC domain-containing protein 8-like isoform X2	LOC107760509	39316	34992.2	13194.3	28433.1	31849	29200.1
A0A1S3X2D5	uncharacterized protein LOC107760339 isoform X1	LOC107760339	117640	42615	46714.2	71077	47090.7	114628
A0A1S3X2D8	Coatomer subunit gamma	LOC107760598	9386000	8.64887e+06	1.07254e+07	8.98576e+06	8912489	9.6918e+06
A0A1S3X2E3	vacuolar protein sorting-associated protein 35B-like	LOC107760603	198370	183731	236972	185627	199448	181831
A0A1S3X2F9	Phospholipid-transporting ATPase	LOC107760557	145800	184431	183056	141893	142131	145004
A0A1S3X2H1	nudix hydrolase 3-like	LOC107760629	198170	84111.4	220354	96275.9	104400	116111
A0A1S3X2H3	Pyruvate kinase	LOC107760370	326930	158526	260584	225209	197126	207853
A0A1S3X2Q1	Pre-mRNA-splicing factor 18	LOC107760550	0	36928.8	0	42925.3	47400	39693.8
A0A1S3Z8B0	histidine biosynthesis bifunctional protein hisIE, chloroplastic-like	LOC107784152	204360	228969	163026	168606	0	188537
A0A1S3Y650	serine/threonine-protein kinase GRIK1-like	LOC107772774	46454	34854.4	41889.1	40293.8	49458.2	34703.8
A0A1S4A393	glucan endo-1,3-beta-D-glucosidase-like isoform X2	LOC107793272	41618	0	30935.3	0	121950	0
A0A1S3X2N6	protein TRI1-like	LOC107760628	111500	17396.6	102246	80154.1	96044.4	94163.7
A0A1S3X2P4	ATP-dependent Clp protease proteolytic subunit	LOC107760634	0	0	23386	64940.1	85005.4	0
A0A1S3X2S4	Ubiquitin carboxyl-terminal hydrolase	LOC107760663	77842	72658	76440.5	99893.6	75350.5	0
Q8W417	Cig3	cig3	166950	129012	0	101969	133849	163460
A0A1S4CFT9	uncharacterized protein LOC107818533	LOC107818533	101210	103087	164432	18077.1	119145	129570
A0A1S3X2T9	60S ribosomal protein L30-like	LOC107760678	1495500	1.17705e+06	2.40224e+06	1.6098e+06	1142229	1.30949e+06
A0A1S4DK00	uncharacterized protein LOC107830617	LOC107830617	252310	379971	245810	375714	254874	127984
A0A1S3X2U7	rRNA biogenesis protein RRP5-like	LOC107760727	27882	16516.3	39135	28033.6	28758.2	35871.3
A0A1S4A7H5	putative methyltransferase At1g22800	LOC107794599	177690	171779	124192	0	0	0
A0A1S4C898	probable enoyl-CoA hydratase 2, mitochondrial	LOC107816158	96228	122844	0	142642	0	0
A0A1S3X2W2	mediator of RNA polymerase II transcription subunit 12-like	LOC107760665	45599	39084.1	28347.7	15873.3	32608.4	45361.9
A0A1S3X2Y7	Methyltransferase	LOC107760513	818800	0	754469	5541.5	862642	0
A0A1S3X2Z0	triosephosphate isomerase, chloroplastic-like	LOC107760622	1955900	2.72021e+06	2709182	3.38403e+06	2.89267e+06	3.41201e+06
Q40568	Phosphate translocator		0	435762	263327	363538	0	266517
A0A1S3X313	uncharacterized protein LOC107760706	LOC107760706	396730	518770	319348	580588	452946	452174
A0A1S3X314	Eukaryotic translation initiation factor 3 subunit C	LOC107760783	6512500	4.44543e+06	6293494	4124587	5.7394e+06	3.83403e+06
A0A1S3ZY45	2-isopropylmalate synthase	LOC107791752	1004100	1.332e+06	2.7429e+06	2.09537e+06	980790	1.23525e+06
A0A1S4DHU2	AT-hook motif nuclear-localized protein	LOC107829884	0	0	0	0	0	65081.7
A0A1S3X344	uncharacterized protein LOC107760560	LOC107760560	4288900	3.9948e+06	3.39887e+06	2423097	3.70187e+06	2.61275e+06
A0A1S4B7W8	DNA repair protein recA homolog 3, mitochondrial-like	LOC107805436	110790	50011.5	105778	71588.8	112034	97805.8
A0A1S3X364	WAT1-related protein	LOC107760582	105660	111964	107484	118834	75417.3	86449.8
A0A1S3Z6H6	replication factor C subunit 2-like	LOC107783617	322190	213890	432098	371731	715023	371879
A0A1S3X369	actin-depolymerizing factor 2	LOC107760585	1152500	1.30849e+06	1.26985e+06	1.73429e+06	1.34445e+06	689911
A0A1S4AVM3	NADH dehydrogenase [ubiquinone] iron-sulfur protein 8, mitochondrial-like	LOC107801885	802820	1.64857e+06	817184	1.39873e+06	1.47074e+06	2.10979e+06
A0A1S4D1Z6	uncharacterized protein LOC107825144 isoform X1	LOC107825144	0	115737	43475.2	21593.7	64713.3	26654.6
A0A1S3X3T3	nucleosome assembly protein 12 isoform X2	LOC107760768	0	0	0	19986.9	122793	153826
A0A1S3X395	probable plastid-lipid-associated protein 13, chloroplastic	LOC107760813	23784	27752.1	16906.1	15559	0	0
A0A1S3X398	copper transport protein ATX1-like isoform X2	LOC107760780	6851200	6487442	5.53069e+06	6.53815e+06	5835787	6.72438e+06
A0A1S3X3A7	protease Do-like 9	LOC107760827	534290	592221	630726	274016	436186	358042
A0A1S3X3B2	wall-associated receptor kinase 2-like	LOC107760832	242030	184037	9928.1	199982	44266	25594.8
A0A1S3X3B5	protein TPLATE	LOC107760733	1707300	1.19848e+06	1.21948e+06	942685	1.96992e+06	1.28248e+06
A0A1S3X3C5	Thioredoxin reductase	LOC107760805	267190	302704	403080	484052	233316	374288
A0A1S4A1T2	protein transport protein SEC13 homolog B-like	LOC107792805	0	0	2754.9	0	99271	98674.8
A0A1S3X3I6	Copper transport protein	LOC107760929	0	0	69162.5	96081.9	0	0
A0A1S3X3J4	Germin-like protein	LOC107760806	961560	2.04606e+06	10813.2	877889	1.36531e+06	309748
A0A1S3X3K4	ubiquitin domain-containing protein DSK2b-like	LOC107760703	911720	1.04105e+06	1.15643e+06	1.16179e+06	1.20727e+06	1.18349e+06
A0A1S3X3L6	ferric reduction oxidase 2-like	LOC107760948	133030	150313	37968.8	26363.2	77666.6	84933.8
A0A1S3X3L9	uncharacterized protein LOC107760713	LOC107760713	54909	72110.1	60626.7	44381.3	61738.5	85497.7
A0A1S3XNU9	Ethylene receptor	LOC107767131	24844	23779.4	19038.8	18965.6	23247.4	15993.7
O04361	Prohibitin	LOC107817175	8709200	5769118	6.86228e+06	4264392	5.0605e+06	4.84958e+06
A0A1S4C147	mitochondrial uncoupling protein 5-like	LOC107814065	39543	49434.1	47066.3	77199.1	32595	30653.7
A0A1S3X3P5	probable calcium-binding protein CML13	LOC107760971	147460	102947	268963	156543	111336	219423
A0A1S4B004	putative dihydroflavonol-4-reductase isoform X1	LOC107803068	414840	303973	279248	346119	390224	162147
A0A1S3X3Q3	protein TWIN LOV 1	LOC107760748	16491	0	10227.6	0	14049.7	0
A0A1S3X3Q5	uncharacterized protein LOC107760858	LOC107760858	1300400	1.32533e+06	1.29818e+06	1.28707e+06	1.39151e+06	1.11161e+06
A0A1S3YBC0	COP9 signalosome complex subunit 5b-like	LOC107774324	476100	511520	598237	412322	560572	465482
A0A1S3X3U3	Peroxidase	LOC107760781	901950	1.13265e+06	1.10725e+06	792758	1.09116e+06	507835
A0A1S3X3V1	Clathrin light chain	LOC107760966	2296000	2.29822e+06	3.66771e+06	3.21778e+06	2.85043e+06	3.01795e+06
A0A1S3X4F2	calcium-dependent protein kinase 4 isoform X2	LOC107760950	181670	52719	171984	192220	176647	156282
A0A1S3X3Y4	serine/threonine-protein kinase STY8-like	LOC107760826	59739	79521.9	314430	324377	56811.4	48637.5
A0A1S3X3Y8	uncharacterized protein At5g02240-like	LOC107761048	399070	492646	267048	670916	361771	636489
A0A1S3X401	RING-type E3 ubiquitin transferase	LOC107761015	0	9770.4	11708	0	7115.4	0
A0A1S3X405	uncharacterized protein LOC107760930	LOC107760930	4470.9	30835.8	14740.4	0	20164.7	24264.9
A0A1S3X407	SCY1-like protein 2	LOC107760988	165980	0	177929	173667	198534	0
A0A1S4B3Y2	54S ribosomal protein L37, mitochondrial-like	LOC107804216	111690	128224	160562	121569	120707	101981
A0A1S3ZHY2	uncharacterized protein LOC107786972	LOC107786972	59383	55695.5	482065	49276.7	85591.1	265960
A0A1S3X491	programmed cell death protein 4-like	LOC107760910	62260	1.26223e+06	1.36252e+06	228000	296336	247882
A0A1S3X4A9	myosin-12 isoform X2	LOC107761072	386970	270336	375629	482168	327338	556931
A0A1S3X4B0	peptide-N4-(N-acetyl-beta- glucosaminyl)asparagine amidase A-like	LOC107760917	0	18040.7	0	19227.7	29076.7	40647.7
A0A1S3X4B5	DNA-(apurinic or apyrimidinic site) endonuclease	LOC107760922	3481000	0	2.46579e+06	2.86509e+06	0	2.69597e+06
A0A1S3X4C3	probable receptor-like protein kinase At2g42960	LOC107761116	8730.3	10380.3	8882.2	10427.8	12710.8	9839.1
A0A1S3X4Y7	Very-long-chain (3R)-3-hydroxyacyl-CoA dehydratase	LOC107761121	112610	95472.9	472169	111496	80215	0
A0A1S3X4E5	Replication factor C subunit 1	LOC107761191	462780	312240	412038	119924	204011	450870
A0A1S3X4F7	nucleolar complex protein 4 homolog	LOC107760954	73271	43104.9	72239.9	43911.5	67082.8	85632.8
A0A1S3X4G0	Peroxidase	LOC107761202	0	159542	42805.9	179295	167358	172216
A0A1S3X4G1	Inositol-1-monophosphatase	LOC107761059	42810	79301	29511.8	90129.9	235731	290206
A0A1S4B1J7	uncharacterized protein LOC107803577 isoform X3	LOC107803577	64838	0	0	0	59220	65857.2
A0A1S3X4H7	tropinone reductase homolog	LOC107761211	7858.9	11283.9	0	2704.9	12330.6	14948.1
A0A1S3X4I3	epoxide hydrolase 4-like	LOC107761167	52343	0	0	287406	39200.2	112361
A0A1S4A2T2	2-methyl-6-phytyl-1,4-hydroquinone methyltransferase, chloroplastic-like	LOC107793127	581980	163545	776973	429185	899778	752278
A0A1S4AAK0	uncharacterized Rho GTPase-activating protein At5g61530-like	LOC107795480	41132	0	29770.2	48166.9	37708.1	25168.8
A0A1S4ADJ6	Cytochrome c oxidase subunit 5C	LOC107796477	0	15542	13532.4	13118.1	16404.9	26047.2
A0A1S3X4K9	Mitochondrial import inner membrane translocase subunit	LOC107761004	145770	33290.7	125948	34921.7	110852	133547
A0A1S3X4L3	Protein phosphatase	LOC107761190	102690	89136	126297	101566	99472.4	104248
A0A1S3X4P8	Serine hydroxymethyltransferase	LOC107761184	25033000	2.38636e+07	2.83108e+07	2.23881e+07	26645501	2.93333e+07
A0A1S3X4S1	ERAD-associated E3 ubiquitin-protein ligase component HRD3A-like	LOC107761054	578660	272119	187326	474293	161819	445647
A0A1S3X4S6	Peroxidase	LOC107761204	0	12934	15651.2	20205.9	19143.3	17562.5
A0A1S3X4U1	Conserved oligomeric Golgi complex subunit 8	LOC107761300	195700	118602	180303	82791.3	127376	168542
A0A1S3X4U8	Methylenetetrahydrofolate reductase	LOC107761305	215480	116371	377274	389320	169896	330254
A0A1S3X4U9	uncharacterized protein LOC107761082	LOC107761082	128200	637558	380147	190836	622132	435805
A0A1S3X4X0	FAD-dependent urate hydroxylase-like	LOC107761320	3806.2	50441.2	0	182688	0	133906
A0A1S3X501	40S ribosomal protein S16-like	LOC107761136	61957	94446.1	148572	107978	123779	73543.8
A0A1S3X5I2	protein ALWAYS EARLY 3-like isoform X2	LOC107761272	9558	7523.5	9510.2	8242.7	10884.9	8919.3
Q945T0	Rapid alkalinization factor	RALF	481350	457457	429226	202774	223534	138241
A0A1S3X532	histone deacetylase 15-like	LOC107761154	56042	99350.5	120292	89050.8	68698.1	148565
A0A1S3X559	Adenosylhomocysteinase	LOC107761175	3843700	1.9635e+06	5.05766e+06	5.07939e+06	4.33309e+06	6.19922e+06
A0A1S4BJN7	calmodulin-binding transcription activator 4-like	LOC107809060	20486	19803.4	13073.6	13935.1	19557.4	16164.6
A0A1S3X570	COP9 signalosome complex subunit 3-like	LOC107761283	0	107337	74090.3	67858.7	0	80731.6
A0A1S3X586	mediator of RNA polymerase II transcription subunit 16	LOC107761365	16176	0	9684.3	11126.4	13834	13652.2
A0A1S4BP66	Expansin	LOC107810403	460530	290523	245860	155499	573663	366968
A0A1S3X593	Phosphoenolpyruvate carboxykinase (ATP)	LOC107761446	4778600	6.95087e+06	3.74451e+06	3721513	4.36823e+06	4.21023e+06
A0A1S3XX44	homogentisate phytyltransferase 1, chloroplastic-like	LOC107769769	0	0	32718.9	0	1997.6	0
A0A1S3X596	putative vacuolar protein sorting-associated protein 13A	LOC107761376	56698	90895.5	0	0	0	0
A0A1S4C6C5	UPF0481 protein At3g47200-like	LOC107815533	126140	47463.6	160811	82149	63449.4	62861.1
A0A1S3X5A3	Vacuolar proton pump subunit B	LOC107761463	546050	276406	534325	358137	361247	0
A0A1S4BND3	[RNA-polymerase]-subunit kinase	LOC107810174	85136	73439.9	132282	35158.9	66050.1	59214.3
A0A1S3X5C8	protein ENHANCED DISEASE RESISTANCE 2	LOC107761330	460590	441995	240913	219716	356017	67948.4
A0A1S3X5D0	NAD(P)H dehydrogenase (quinone)	LOC107761412	1365300	1.80046e+06	1.23943e+06	2089358	1.6224e+06	1.62629e+06
A0A1S3X5E0	probable nucleoredoxin 1	LOC107761425	852500	1.14249e+06	548989	1.31113e+06	745994	671852
A0A1S4CV99	uncharacterized RING finger protein P8B7.15c-like	LOC107822976	5835.2	0	5552.6	24451.1	29349	29220.9
A0A1S3X5F8	Eukaryotic translation initiation factor 3 subunit A	LOC107761510	125900	110860	2647.7	158336	143991	118000
A0A1S3X5F9	uncharacterized protein LOC107761450	LOC107761450	193290	71849.9	88538.5	65045.6	94235.9	124989
A0A1S3X5G4	brefeldin A-inhibited guanine nucleotide-exchange protein 5-like	LOC107761455	2001300	1.76076e+06	3.54411e+06	1.60878e+06	1663096	2892616
A0A1S3X5H2	dipeptidyl aminopeptidase 4	LOC107761261	199740	157858	81195.7	198405	96222.2	115922
A0A1S3X5H7	Xylulose kinase	LOC107761269	692200	438955	384896	596702	627404	507910
A0A1S3X5U3	EH domain-containing protein 1-like isoform X5	LOC107761527	79457	133954	80777.7	273630	150763	106987
A0A1S3X5I0	Carbonic anhydrase	LOC107761423	6543300	6.66962e+06	6.35993e+06	4701623	6.13326e+06	5903109
A0A1S3X5I4	GrpE protein homolog	LOC107761529	1331700	912159	1.26407e+06	526550	600636	705846
A0A1S3X5I5	probable nucleoredoxin 1	LOC107761428	33743	34926.6	46674.3	28694.1	0	0
A0A1S3X5K0	cytochrome b5-like	LOC107761444	2601800	2432285	2.17181e+06	2.90788e+06	2.42605e+06	2.40137e+06
A0A1S3X5K8	glycolipid transfer protein 1-like	LOC107761496	44479	38911.3	59193.2	63188	41113.5	50366
A0A1S3X5L8	40S ribosomal protein S17-like	LOC107761505	0	0	0	0	0	83502.9
A0A1S3X5M0	LRR receptor-like serine/threonine-protein kinase FLS2	LOC107761299	177010	140023	153809	214020	149910	96067.9
A0A1S3X5M1	probable receptor-like protein kinase At5g18500	LOC107761475	446430	485014	360656	428641	485982	383318
A0A1S4AS92	molybdate transporter 1-like	LOC107800824	350390	428261	21174.5	498044	30819.4	9755.1
A0A1S3X5P1	Peroxidase	LOC107761316	0	671402	0	377405	421523	694275
A0A1S4ABF9	protein CHROMATIN REMODELING 5-like isoform X2	LOC107795803	24261	18286.7	22115.2	21282.8	20045.5	11773.5
P25872	Phenylalanine ammonia-lyase	TPA1	257790	179925	507272	864476	863700	807089
A0A1S3X5S0	LOW QUALITY PROTEIN: nuclear-pore anchor-like	LOC107761488	1530500	1.26595e+06	1.60941e+06	1.30568e+06	1.72115e+06	1.67673e+06
Q589Y3	Glycosyltransferase	NtGT4	0	42639.1	20600.9	38733.5	28499.2	29618.5
A0A1S3YK06	UDP-glucuronate decarboxylase	LOC107776859	150660	97616.2	153070	46234.4	103526	220009
A0A1S3X5T2	probable inactive receptor kinase At5g58300	LOC107761564	119590	121664	125539	137547	105930	164272
A0A1S3X5T5	ethylene-insensitive protein 2-like	LOC107761491	64203	62313.4	58682.5	50560.1	56270.9	52327.8
A0A1S4B3Y4	protein NETWORKED 4A-like	LOC107804223	0	8178.1	0	64444.2	15033.1	20763.6
A0A1S3X5U4	uncharacterized protein LOC107761629	LOC107761629	52634	89610.6	113938	226911	126276	105655
A0A1S3X5U9	RNA-binding protein BRN1-like isoform X2	LOC107761631	83510	82064.3	82389.7	80886	28480.7	81682.8
A0A1S3X5W8	SNF1-related protein kinase regulatory subunit gamma-1-like	LOC107761590	10155	5406.2	9554.1	0	33194.1	30952.2
A0A1S3X5Y1	F-box protein At1g10780-like	LOC107761538	0	0	469266	1925.6	5379.1	0
A0A1S3ZI83	3-oxoacyl-[acyl-carrier-protein] reductase	LOC107787149	0	210292	214508	154035	207278	46647.4
A0A1S3X5Z8	uncharacterized protein LOC107761618	LOC107761618	280230	217630	300834	237929	238721	330084
A0A1S3X607	protein FLX-like 3 isoform X2	LOC107761685	72773	55336.9	58231.6	59192.4	82183.8	121504
A0A1S3X615	uncharacterized aarF domain-containing protein kinase At5g05200, chloroplastic-like	LOC107761569	5900.7	118328	177759	67518.3	127941	85490.1
A0A1S4AYP6	serine/arginine-rich splicing factor RS41-like isoform X2	LOC107802667	96651	10250.3	10601.7	106071	10825.3	12506.5
A0A1S3X642	acyl-CoA-binding domain-containing protein 4-like	LOC107761658	72922	69656.3	14405.3	8974.4	75778	99307.6
A0A1S3X644	DEAD-box ATP-dependent RNA helicase 40-like	LOC107761593	1625100	1.12084e+06	1.38377e+06	947871	986657	1.18859e+06
A0A1S4C382	universal stress protein A-like protein isoform X2	LOC107814656	7104.3	4708.2	41115	7105.7	7777.6	35799.5
A0A1S3X664	UDP-glycosyltransferase 73C3-like	LOC107761611	685630	694103	752504	892210	804421	596346
A0A1S3X673	TLD domain-containing protein 1-like	LOC107761504	55869	89188.5	81279.5	151448	46483.5	92744.1
A0A1S3X6Z8	uncharacterized protein LOC107761734 isoform X3	LOC107761734	178930	28656.4	121379	123339	184590	132243
Q9FV62	Guanine nucleotide-binding protein alpha subunit		102640	260495	55975.2	56495.1	112240	149386
A0A1S3X696	Methyltransferase	LOC107761752	367560	29950	408547	18071.4	316219	435078
A0A1S3X699	Biotin synthase	LOC107761704	9017.7	0	15688.1	7619.1	5706.1	23694.4
A0A1S3X6A4	Pyruvate kinase	LOC107761670	89569	57182.7	112401	51481.6	76414	120578
A0A1S3X6B1	transmembrane emp24 domain-containing protein p24delta3-like isoform X1	LOC107761539	651490	1.00722e+06	1.10247e+06	957675	1.03115e+06	900560
A0A1S3X6B4	uncharacterized protein LOC107761715	LOC107761715	412950	343951	609439	254792	317545	279996
A0A1S3X6R9	protein DEK-like isoform X3	LOC107761779	423850	25180.2	385205	26414.3	470784	62002.6
A0A1S3X6E0	protein SRG1-like	LOC107761788	107890	115332	0	176334	79539.9	72243.1
A0A1S3X6E2	uncharacterized protein LOC107761735	LOC107761735	37125	189723	246519	191313	216927	203650
A0A1S3YQZ3	protein trichome birefringence-like 14	LOC107778830	32987	40676.2	38790.8	36223.3	0	30725.5
A0A1S3X6F5	60S acidic ribosomal protein P1-like	LOC107761577	401270	327144	444228	299230	376681	414940
A0A1S3X6H7	vacuolar-sorting receptor 3-like	LOC107761706	43906	43709.6	44527.6	46456.8	47884	42598.2
A0A1S3X6Y1	Mannan endo-1,4-beta-mannosidase	LOC107761831	2135.2	0	0	281834	0	88261.4
A0A1S3X6Y5	uncharacterized membrane protein At1g16860-like isoform X2	LOC107761836	31282	63827.9	62049.1	238156	177356	82268.4
A0A1S4A7S0	protein SRG1-like	LOC107794635	101280	0	115474	5295.1	0	0
A0A1S3X6M0	Lipoxygenase	LOC107761738	13002000	1.70762e+07	1.38776e+07	1.42086e+07	1.35113e+07	1.86544e+07
A0A1S3X6R2	armadillo repeat-containing protein LFR-like	LOC107761671	16767	0	12824.2	17235	12659.5	17815.7
A0A1S3X6T2	thioredoxin-like 2, chloroplastic isoform X1	LOC107761688	0	20113.9	0	15535.1	16091.5	14321.9
A0A1S3X6T6	probable dolichyl-diphosphooligosaccharide--protein glycosyltransferase subunit 3B	LOC107761921	1425400	1.19848e+06	959361	698582	987880	1.04597e+06
A0A1S4ASQ7	protein SLOW WALKER 1-like	LOC107800862	18554	14926.4	35060.1	55460.1	58278.7	46502.9
A0A1S3X6V0	Xylose isomerase	LOC107761872	0	0	0	290765	734372	513162
A0A1S3X6W9	Pyrophosphate--fructose 6-phosphate 1-phosphotransferase subunit alpha	LOC107761890	12866000	9.83477e+06	1.62048e+07	1.17881e+07	1.30582e+07	8729797
A0A1S4BGW5	FACT complex subunit SSRP1	LOC107808145	368670	569410	387010	677112	606514	759702
A0A1S4C4T3	Hexosyltransferase	LOC107815141	11845	6164.1	9754.7	8478.3	0	9648.4
A0A1S4CGU2	uncharacterized protein LOC107818858	LOC107818858	182750	188094	322251	117688	172639	168069
A0A1S3YCF1	Non-specific serine/threonine protein kinase	LOC107774785	69516	92855	98321.2	0	0	41809.5
A0A1S3X727	ABC transporter B family member 15-like	LOC107761767	346700	375794	1.01349e+06	42328.5	208676	598689
A0A1S3X742	SH3 domain-containing protein 3-like	LOC107761786	926390	662140	761582	801337	686632	784430
A0A1S3X745	probable protein phosphatase 2C 6	LOC107762024	140410	0	3030.1	116031	13034.5	0
A0A1S3X756	nitrogen regulatory protein P-II homolog isoform X1	LOC107761932	171070	186169	136641	203137	183768	160608
A0A1S3X765	chaperone protein dnaJ 10-like isoform X2	LOC107762047	584360	674792	673570	552116	609658	394132
I2FJN7	Polyadenylate-binding protein	PABP	3652400	3.27374e+06	6.24491e+06	3.50295e+06	4.40461e+06	4.87452e+06
A0A1S3X7C4	LOW QUALITY PROTEIN: F-box protein At1g78280-like	LOC107761868	70733	47110.4	77299.3	84756.8	64249.9	32239.6
A0A1S3Y0S4	uncharacterized protein LOC107770758	LOC107770758	51620	54716.8	78661.9	58378.8	53263.3	63974.7
A0A1S3X7E9	uncharacterized protein LOC107761891	LOC107761891	33978	39454.8	132092	67922.3	178702	186034
A0A1S4DJF2	cleavage stimulating factor 64-like isoform X2	LOC107830391	31035	80274.3	84590.2	65726.5	74765.9	72257.3
A0A1S3X7H4	40S ribosomal protein S16-like	LOC107762148	17171000	9.72378e+06	1.86547e+07	1.46557e+07	1.59312e+07	1.48593e+07
A0A1S3X7H9	AAA-ATPase At5g57480-like	LOC107762150	78886	62194.2	80304.9	78867.3	76553.8	93504.5
A0A1S3X7I1	uncharacterized protein LOC107762051	LOC107762051	92980	101268	79531.8	68144.7	92236.3	61430.2
A0A1S3X7K7	ATP synthase subunit d, mitochondrial	LOC107761950	0	0	0	0	1.11017e+06	0
A0A1S3X7M0	ATP synthase subunit gamma, mitochondrial	LOC107762073	9366700	8.83487e+06	7.64444e+06	1.61672e+06	8.1074e+06	6.24201e+06
A0A1S3X7N0	shikimate O-hydroxycinnamoyltransferase-like	LOC107762091	621320	360452	317812	334216	294250	341447
A0A1S3X7R6	ribose-phosphate pyrophosphokinase 1-like	LOC107762224	24193	22806.2	45006.4	22322.3	31511	27300.6
A0A1S3X7R7	uncharacterized protein LOC107762126	LOC107762126	100020	96737	292335	110652	130479	111974
A0A1S3XDA8	uncharacterized protein LOC107763934	LOC107763934	3801.8	0	26463.4	0	196653	28136.5
A0A1S3X7S2	Pre-mRNA cleavage factor Im 25 kDa subunit	LOC107762129	729340	673589	935121	668329	714345	952273
A0A1S4D4J9	uncharacterized protein C6C3.02c-like	LOC107825864	253490	0	247606	200992	0	0
A0A1S3X7T0	Phosphoenolpyruvate carboxylase	LOC107762239	11329000	9898524	1.59564e+07	9.21124e+06	12079924	1.25433e+07
A0A1S3X7V8	probable 2,3-bisphosphoglycerate-independent phosphoglycerate mutase	LOC107762263	1052500	152325	1.21509e+06	190847	86504.6	837654
A0A1S3X7W4	uncharacterized protein LOC107762157	LOC107762157	182840	378462	448957	385031	724446	575359
A0A1S3X7W9	xanthine dehydrogenase 1-like isoform X1	LOC107762161	83570	114763	136322	40053.2	145687	130883
A0A1S3X7Y0	non-classical arabinogalactan protein 31-like	LOC107762179	269980	770736	293891	1.62421e+06	300097	857508
P29449	Thioredoxin H-type 1		5558000	5.74047e+06	5.9691e+06	6.21803e+06	8.72671e+06	1.57783e+06
A0A1S4B0E5	phosphoinositide phosphatase SAC3-like	LOC107803238	72768	67603.8	64937	71788.5	80080.4	55019.7
A0A1S3X805	beta-glucosidase 18-like	LOC107762201	814430	590253	1.36142e+06	431988	947692	694473
A0A1S3X806	Putative rRNA methyltransferase	LOC107762194	263600	172446	175834	77196.9	104790	145259
A0A1S4B6N2	S-acyltransferase	LOC107805133	51890	45535.8	3306.7	31772.7	0	78273
A0A1S3X808	splicing factor U2AF-associated protein 2-like	LOC107762319	94585	90438.4	83460	85614.7	98513.7	89947.4
A0A1S3X811	RING-type E3 ubiquitin transferase	LOC107762200	38750	21223.9	146038	41587.4	13500	4.82965e+06
A0A1S3X820	uncharacterized protein LOC107762210	LOC107762210	70121	48936.6	95778.5	60357.8	74612.7	84797.8
A0A1S4DQ31	fasciclin-like arabinogalactan protein 17	LOC107832235	1933.7	47622.2	497955	233810	376085	83209.1
A0A1S3X832	staphylococcal nuclease domain-containing protein 1-like	LOC107762347	1844300	1.82976e+06	1.75894e+06	1.81361e+06	1.4319e+06	1.61533e+06
A0A1S3X837	cystathionine gamma-synthase 1, chloroplastic-like	LOC107762350	37334	36025.5	70120.1	41426.3	44422.2	73023.3
A0A1S3X839	60S ribosomal protein L34-like	LOC107762102	0	254514	514215	0	390686	4065.3
A0A1S3X845	NAD(P)H dehydrogenase (quinone)	LOC107762151	322200	318079	302520	250514	416314	464302
A0A1S4C538	protein FAM192A-like isoform X6	LOC107815243	23025	97077.1	20087.2	109097	24037.6	124545
A0A1S3X879	L-cysteine desulfhydrase-like	LOC107762255	40073	106188	132581	95154.8	41501.9	0
A0A1S3X887	transcriptional activator FHA1	LOC107762274	0	0	0	80148.4	0	0
A0A1S3X896	cell wall integrity protein scw1-like	LOC107762394	0	0	0	78172.8	1601.8	0
A0A1S3X8A3	Nuclear pore complex protein	LOC107762287	0	20647.6	18616.8	18650.1	21061.8	15463.8
A0A1S3X8D1	fatty acid amide hydrolase-like	LOC107762431	27377	24098.7	27155.7	32440	32875.6	22993.6
A0A1S3X8D5	basic leucine zipper and W2 domain-containing protein 2-like	LOC107762222	2975200	2.55968e+06	3.24007e+06	2.45135e+06	2777170	3.10693e+06
A0A1S4A1M1	Polynucleotide adenylyltransferase	LOC107792847	58784	51095.2	58522.9	47290.8	63073.3	41944.6
A0A1S3X8D8	coiled-coil domain-containing protein 18-like	LOC107762325	209480	53217.6	312475	126971	69278.7	195952
A0A1S3X8G7	vesicle-associated protein 1-2-like	LOC107762211	258570	116491	199246	128298	348814	126387
A0A1S3X8H2	uncharacterized protein LOC107762466	LOC107762466	1291300	1.29176e+06	1.59076e+06	1.52265e+06	978529	1.25924e+06
A0A1S3X8I6	dentin sialophosphoprotein-like	LOC107762228	20855	105687	0	163590	111911	9245.8
A0A1S3X8J3	Carboxypeptidase	LOC107762483	1561900	2427911	1.62547e+06	1.95126e+06	2.84129e+06	2647700
A0A1S3X8M2	ATP synthase subunit epsilon, mitochondrial	LOC107762397	82699	82928.2	113469	62491.2	345546	546013
A0A1S3X8M8	protein transport protein Sec24-like At4g32640	LOC107762318	1024300	838566	1.20342e+06	804446	863618	1.2754e+06
A0A1S4AQT5	exocyst complex component EXO84B-like	LOC107800394	118590	104090	157250	192697	201113	52740.5
A0A1S3X8Q9	26S proteasome non-ATPase regulatory subunit 8 homolog A-like isoform X2	LOC107762302	1352600	1.74884e+06	293542	1.48339e+06	1.38679e+06	501176
A0A1S3X8R4	26S proteasome non-ATPase regulatory subunit 8 homolog A-like	LOC107762432	781930	668887	384676	741034	227018	774730
A0A1S3X8R5	DNA (Cytosine-5)-methyltransferase CMT2-like	LOC107762306	161690	51733.8	267666	321313	141854	164234
A0A1S3X8S4	stem-specific protein TSJT1-like	LOC107762442	4217500	3679319	3.36805e+06	3.94597e+06	4.00335e+06	3.83459e+06
A0A1S3X8T3	DEAD-box ATP-dependent RNA helicase 8-like	LOC107762362	1721600	1.3928e+06	1.72223e+06	1.81554e+06	1.62898e+06	1.79706e+06
A0A1S3X8U2	cis-abienol synthase, chloroplastic-like	LOC107762461	0	37126.7	0	0	0	0
A0A1S3X8V7	lipid phosphate phosphatase gamma, chloroplastic-like	LOC107762476	113720	107285	100291	116724	116751	117235
A0A1S3X8W5	uncharacterized protein LOC107762475	LOC107762475	41904	0	0	41184.6	56590.5	0
A0A1S3X8X2	chitin elicitor receptor kinase 1-like	LOC107762357	26231	35549.9	12066.1	31091.9	23582.4	30736.8
A0A1S3X8Z4	ras-related protein RABC1	LOC107762524	1041500	1.28082e+06	1.27564e+06	932869	1.61881e+06	1.02869e+06
Q40517	Mitogen-activated protein kinase homolog NTF3	NTF3	36835	61171.8	78175.1	40902	59314.5	91774.1
A0A1S4BM58	probable choline kinase 1	LOC107809797	135630	108561	108950	97961.1	136541	96634.6
A0A1S3X916	basic 7S globulin-like	LOC107762538	614390	687356	655245	445549	1.55294e+06	1.13013e+06
A0A1S4CJU7	jasmonic acid-amido synthetase JAR1-like	LOC107819824	54369	0	42774.9	0	50667.7	0
A0A1S3X932	uncharacterized protein LOC107762557	LOC107762557	0	356559	183904	337245	0	714989
A0A1S4CUD5	RNA helicase	LOC107822563	20386	8515.5	0	0	0	23416.7
A0A1S3X946	abscisic acid receptor PYR1-like	LOC107762606	1727500	2937266	2.42948e+06	2.40891e+06	3.24255e+06	1.92721e+06
A0A1S3YZH7	Receptor-like serine/threonine-protein kinase	LOC107781326	26878	38057.3	12729.4	19859.8	24694.2	41420.4
A0A1S3X966	protein phosphatase 2C 29-like	LOC107762463	25416	25711.6	23720.2	36159.8	27056.5	30456.3
A0A1S3X975	traB domain-containing protein-like	LOC107762595	238840	183534	207266	175868	211481	190483
A0A1S3ZSA6	Katanin p80 WD40 repeat-containing subunit B1 homolog	LOC107789923	12111	12175.1	11482.5	0	9959.2	17929
A0A1S3X991	RNA-binding protein Musashi homolog 2-like	LOC107762486	0	308708	413834	415386	420383	481378
A0A1S4CG25	phosphopantothenoylcysteine decarboxylase-like	LOC107818426	0	54299.1	71159.5	21683.4	18882.3	60982.5
A0A1S3X999	nuclear pore complex protein NUP1-like isoform X2	LOC107762631	271670	320277	67572.4	333364	304814	275566
A0A1S3X9A7	coatomer subunit beta-2-like	LOC107762632	174710	30029.9	39126	26000.1	24317.1	166813
A0A1S3X9A9	Laccase	LOC107762661	31505	52809.8	25527.7	70474.4	22278.4	34718
A0A1S3X9D6	Nucleoside diphosphate kinase	LOC107762688	7220100	6.65016e+06	6.82278e+06	7.6912e+06	6.52199e+06	5.90481e+06
H9CCI2	[Acyl-carrier-protein] S-malonyltransferase	MT	940710	481000	672173	452335	521134	592918
A0A1S3X9G6	Glucose-1-phosphate adenylyltransferase	LOC107762694	77907	39996.1	81624.6	30768.4	75880.7	76012.8
A0A1S3X9F6	Adenylosuccinate synthetase, chloroplastic	LOC107762705	1141500	908014	1.67614e+06	1.80362e+06	1472382	1.25074e+06
Q8LNZ4	Tobacco nucleolin	NNF1	7477100	4.92023e+06	7.0175e+06	6.61554e+06	7.49868e+06	7.00141e+06
A0A1S3X9H1	NEDD8-conjugating enzyme Ubc12-like	LOC107762697	0	0	19719.1	0	0	57615.2
A0A1S3X9H3	peroxisome biogenesis protein 22-like	LOC107762597	509040	413761	332875	464613	403448	513247
A0A1S3X9I1	NADPH--cytochrome P450 reductase	LOC107762570	416340	148389	472199	568741	545477	655285
A0A1S3X9M6	protein decapping 5-like isoform X2	LOC107762738	984920	1.6735e+06	990723	225288	918212	622585
A0A1S3X9L9	uncharacterized protein LOC107762645	LOC107762645	915500	2413586	784614	4.42644e+06	1.28907e+06	3.03165e+06
A0A1S3X9M1	protein RNA-directed DNA methylation 3-like	LOC107762737	29595	37693.1	116910	55562.3	47404.1	39224.3
A0A1S3X9M8	Peroxidase	LOC107762615	36628	3353.2	46201.4	0	47815.2	15750.9
A0A1S4CPE4	protein RETICULATA, chloroplastic-like	LOC107821219	288920	142834	279966	249584	439495	409056
A0A1S3X9N4	uncharacterized protein LOC107762618	LOC107762618	42079	23401	46035.8	23677.2	23873.2	31429.2
A0A1S3X9Q3	Prohibitin	LOC107762680	8752300	7374822	8829306	6.43568e+06	8.09528e+06	7.6537e+06
A0A1S4ADH9	cysteine-rich receptor-like protein kinase 42	LOC107796473	44529	0	0	41084.7	0	34165.5
A0A1S4CR56	probable alpha,alpha-trehalose-phosphate synthase [UDP-forming] 7	LOC107821671	76248	633588	189081	421696	370752	145372
A0A1S3X9T6	protein usf-like	LOC107762794	529400	580138	633060	427097	677816	221586
Q9ZP50	FtsH-like protein Pftf	Pftf	198760	174316	49810.5	224936	181641	322292
A0A1S3X9U8	actin-104	LOC107762828	2030000	4473423	5.14035e+06	6.14756e+06	2.04504e+06	1.77911e+06
Q50LG5	Peroxidase	NtPOX1	4639800	6.57689e+06	2.54549e+06	5601504	5.93022e+06	6.17287e+06
A0A1S3X9W3	BSD domain-containing protein 1-like	LOC107762842	240830	256362	430951	256506	247127	298830
A0A1S3X9W8	sm-like protein LSM2	LOC107762847	123050	161970	123773	175846	196068	124583
A0A1S3X9X9	lamin-like protein	LOC107762834	65604	81518.7	54018.1	0	483875	473303
A0A1S4C0X2	Elongation factor Tu	LOC107813892	3085400	1.79204e+06	3.07597e+06	2.38111e+06	2.68109e+06	3036562
A0A1S3X9Z8	dentin sialophosphoprotein-like	LOC107762875	501230	176175	523482	696460	266013	446516
A0A1S3XA06	tetrahydrocannabinolic acid synthase-like	LOC107762856	3631.8	762720	919570	956563	151071	914860
A0A1S3XA37	phosphoinositide phosphatase SAC8-like isoform X2	LOC107762893	0	0	24464.3	24137.9	0	37584.6
A0A1S3XA26	Cysteine desulfurase	LOC107762876	724750	1.14512e+06	1.4122e+06	949323	616049	769280
A0A1S3XA54	mannosylglycoprotein endo-beta-mannosidase isoform X1	LOC107762938	287320	652079	181680	591550	416807	291510
A0A1S4CPD4	la-related protein 6B-like	LOC107821049	225990	268259	248853	15535.1	15744.2	61043.9
A0A1S3XA68	molybdopterin synthase catalytic subunit-like	LOC107762931	232970	199740	0	0	0	42409.3
A0A1S3XA73	uncharacterized protein LOC107762950	LOC107762950	211850	44419.3	32673	35662.7	43873.5	0
A0A1S4C7H9	translation initiation factor eIF-2B subunit beta-like isoform X2	LOC107815973	54130	59603.7	65626.3	52184	68822.5	68453.7
A0A1S3XA93	endo-1,31,4-beta-D-glucanase-like	LOC107762850	1177100	1.5051e+06	2.70689e+06	1.73565e+06	1.61727e+06	3.67582e+06
A0A1S3XAB1	WD-40 repeat-containing protein MSI4-like	LOC107762983	128790	97244.4	121718	109170	96639.4	113126
A0A1S3XAB9	Glutamate dehydrogenase	LOC107762966	5613500	5.80269e+06	2.68215e+06	3.51181e+06	4.12604e+06	3.67166e+06
A0A1S3YSF6	Beta-galactosidase	LOC107779266	776040	819058	413305	455194	887868	450190
A0A1S4BUT6	TATA-binding protein-associated factor 2N-like isoform X2	LOC107812132	0	4431.3	21298.2	24834.7	15040.3	0
A0A1S3Z242	cytochrome c oxidase subunit 6a, mitochondrial-like	LOC107782102	1057200	944231	4076691	3.74614e+06	4697360	3.26929e+06
A0A1S3XAH6	UNC93-like protein 3	LOC107763018	305060	119640	105030	113784	76756.2	489265
A0A1S3XAI3	Methenyltetrahydrofolate cyclohydrolase	LOC107762887	77043	44229	37049.1	35299.6	20138	72693.7
A0A1S4BDP9	uncharacterized protein LOC107807165	LOC107807165	43480	48565.9	42723.1	27690.9	44718.1	40559.9
A0A240EUR4	Squamosa promter-binding-like protein 11	SPL	110530	69183.9	61957.4	115214	48080.3	68322.4
A0A1S3XAK7	trithorax group protein osa-like	LOC107762919	3338800	3.48478e+06	1.96942e+06	2.82844e+06	3.48289e+06	2367742
A0A1S3XAM4	Transmembrane 9 superfamily member	LOC107762982	86139	82613.3	137878	145354	140045	123119
A0A1S3XAN0	uncharacterized protein LOC107763083	LOC107763083	529240	568350	592591	494696	556688	473388
A0A1S3Y218	40S ribosomal protein S14-2-like	LOC107771427	9123100	8.78107e+06	1.19843e+07	8.5693e+06	9.55389e+06	1.15232e+07
A0A1S3XAP3	Dolichyl-phosphate beta-glucosyltransferase	LOC107762997	62643	55217.7	58129.9	45588.7	58847	55924.5
A0A1S3XAR3	protein DJ-1 homolog B-like	LOC107763100	347390	301644	303208	314879	196674	178648
A0A1S3XAT0	RNA-binding protein 25-like isoform X3	LOC107763094	371790	417971	360496	285840	366847	337432
A0A1S3Y7U3	CLP protease regulatory subunit CLPX1, mitochondrial-like	LOC107773337	220500	194174	102905	180736	193437	69243.3
Q9FSF6	60S ribosomal protein L11-1-like (Fragment)	rbl11-like	6593500	3.01873e+06	1.15524e+07	9.12307e+06	1.00401e+07	1.07128e+07
A0A1S3XAY9	RWD domain-containing protein 1-like	LOC107763144	421450	651697	475152	1.03171e+06	982609	988259
A0A1S4C1C1	trafficking protein particle complex subunit 13-like	LOC107814062	162670	151177	112332	115918	161747	216438
A0A1S3XB15	eukaryotic translation initiation factor 4B2-like	LOC107763159	373030	358211	669390	481850	322796	452221
A0A1S3XB16	Spermidine synthase	LOC107763093	538160	551980	517656	708625	70313.5	27582.1
A0A1S3XB41	protein FLX-like 1 isoform X2	LOC107763171	46203	41564.2	162427	119708	37798.6	36398.3
A0A1S3XB34	probable proteasome inhibitor	LOC107763060	31708	30730.8	29540.7	26847.8	35362.2	37905.8
A0A1S3XB37	Carboxypeptidase	LOC107763201	3627200	3.96483e+06	2.91278e+06	2.96064e+06	2.68952e+06	3.24134e+06
A0A1S3XB38	ISWI chromatin-remodeling complex ATPase CHR11 isoform X1	LOC107763174	786870	182003	689510	348990	248462	281724
A0A1S3XB60	mitochondrial import inner membrane translocase subunit TIM10-like	LOC107763125	41528	46453.2	31752.3	36997.3	178373	0
A0A1S3XBA1	flowering time control protein FPA-like isoform X2	LOC107763232	173540	69297.7	131733	61212.3	131517	197321
A0A1S4D7U0	ER lumen protein-retaining receptor	LOC107826975	310840	188083	373644	156396	75863.3	192183
A0A1S3XB94	TOM1-like protein 2	LOC107763152	241870	26972.4	0	15603.2	31133.9	25475.8
A0A1S3XBA2	patellin-4-like	LOC107763223	373230	450032	704473	1019328	506553	609230
A0A1S3XBB5	protein BUD31 homolog 2-like	LOC107763164	102710	112511	107723	113501	121868	127662
A0A1S3XBC3	pentatricopeptide repeat-containing protein At3g49240-like	LOC107763128	486110	504664	709960	513341	484923	326221
A0A6J3ZYZ7	Stromal L-ascorbate peroxidase	apx	1831200	3305340	2.85362e+06	2.42639e+06	1.10914e+06	2.17515e+06
A0A1S4D1I1	Beta-hexosaminidase	LOC107824971	271140	272578	199894	322550	278159	215541
A0A1S3ZIE1	Photosystem I reaction center subunit II, chloroplastic	LOC107787208	0	120034	0	0	0	0
A0A1S4BJ42	Non-specific lipid-transfer protein	LOC107808801	170730	135868	189011	75966.8	201586	151332
A0A1S3XBH8	probable cinnamyl alcohol dehydrogenase 1	LOC107763167	56772	34759.3	86367.8	54461.5	36846	29532.5
A0A1S3XBI6	Lipoxygenase	LOC107763327	216550	179401	141469	59005.2	276720	97021.9
A0A1S3XBI8	putative lysine-specific demethylase JMJD5	LOC107763337	21542	0	18504.1	17134.1	15913.7	24324.4
A0A1S3XBJ3	tRNA (adenine(58)-N(1))-methyltransferase	LOC107763321	28899	33440.5	32319.9	0	28769.5	29953.8
A0A1S3XBM3	probable protein S-acyltransferase 7	LOC107763195	19135	14019.8	17407.8	0	19347.8	19038.8
A0A1S3XBM4	Phosphoenolpyruvate carboxylase	LOC107763355	134750	133769	118257	146557	114120	126161
A0A1S3XBM6	RNA methyltransferase	LOC107763349	58536	8324.5	81457	49536.6	76271.2	81353.1
A0A1S3XBP1	Peroxidase	LOC107763371	679060	1.28574e+06	0	1.01614e+06	829842	1450889
A0A1S4D8J3	accelerated cell death 11-like	LOC107827167	159200	104476	124990	112090	132554	170204
A0A1S4AHZ4	Ubiquinol oxidase	LOC107797824	33347	0	0	0	21542.7	0
A0A1S3XBR3	T-complex protein 1 subunit epsilon	LOC107763390	3220500	1.94688e+06	3.76726e+06	2.76637e+06	2.75025e+06	2.84643e+06
A0A1S3YEZ4	UPF0481 protein At3g47200-like	LOC107775355	61961	80406.6	56894.9	22682	87320.5	26885
P41098	60S ribosomal protein L34	RPL34	2154700	1.9191e+06	2.43696e+06	1.72714e+06	3.78962e+06	1.93713e+06
A0A1S3XBV6	glycine-rich RNA-binding protein 2, mitochondrial-like	LOC107763441	552600	439764	538066	0	0	417850
A0A1S4BRQ5	60S ribosomal protein L27	LOC107811199	234610	6735.3	0	26030.7	200774	401075
A0A1S4CKQ6	Mannosyltransferase	LOC107819930	138570	53978.7	0	0	48904.4	47803.5
A0A1S4D1L4	Endoglucanase	LOC107824972	68291	63449.6	73682.3	0	0	0
A0A1S3XBX7	Diphosphomevalonate decarboxylase	LOC107763449	212080	231309	236972	286804	207936	267292
A0A1S3XBX9	probable LRR receptor-like serine/threonine-protein kinase At4g36180	LOC107763438	64914	76223.9	81057	85704.3	78847.3	70811.2
A0A1S3XBY3	coiled-coil domain-containing protein 12-like	LOC107763359	416830	433564	291697	423409	352102	394293
A0A1S3XBZ1	Ubiquinol oxidase	LOC107763364	1530600	805640	1.19683e+06	1.10228e+06	1.25475e+06	1.00252e+06
A0A1S4CF02	Pyruvate dehydrogenase E1 component subunit beta	LOC107818291	1396400	905095	1.45988e+06	1.23475e+06	1.20861e+06	1.45741e+06
A0A1S3XC23	zinc finger CCCH domain-containing protein 53-like isoform X2	LOC107763476	0	0	98823.9	0	103588	0
A0A1S3XC18	protein NtpR-like	LOC107763493	15908	23471	14462.1	9198.1	19324.2	114458
A0A1S3XC37	miraculin-like	LOC107763353	10486000	1.16775e+07	8.67269e+06	7856540	1.1562e+07	8659713
A0A1S3XHS5	protein LEO1 homolog isoform X3	LOC107765147	97451	95885.2	307039	354358	238855	65884.6
A0A1S3XC40	protein QUIRKY-like	LOC107763417	6694	34517.6	0	24132.2	0	0
A0A1S3XC48	uncharacterized protein DDB_G0283697-like	LOC107763501	20130	15836.2	17569.4	13067	20635.3	20228.9
A0A1S3XC54	S-adenosylmethionine synthase	LOC107763541	2291800	1.28443e+06	3.96736e+06	3.29098e+06	1.47927e+06	3.69206e+06
A0A1S3XC61	aspartyl protease family protein At5g10770-like	LOC107763440	191140	274251	137140	267264	176729	212377
A0A1S3XC63	uncharacterized protein LOC107763363	LOC107763363	67299	80727	61849.6	85394.5	72992.3	74655.5
A0A1S3XC75	flavonol synthase/flavanone 3-hydroxylase-like	LOC107763562	198610	132358	113339	80187	144412	126161
A0A1S3XC77	Electron transfer flavoprotein subunit alpha	LOC107763455	868620	1.97553e+06	1.49669e+06	1525599	1.50424e+06	862373
A0A1S3XC80	7,8-dihydroneopterin aldolase	LOC107763556	35239	34705.7	0	61034.2	13538	41550.7
A0A1S3XC82	Annexin	LOC107763461	34614000	3.52153e+07	2.89622e+07	3.26045e+07	3.39689e+07	3.02353e+07
A0A1S4DJY8	cytochrome c oxidase assembly protein COX15-like	LOC107830583	30731	13537.6	18970	0	19414.6	21197.1
A0A1S4BTW3	mitochondrial uncoupling protein 5-like	LOC107811785	76305	28894.8	101209	60968.4	86068.9	18488.2
A0A1S3XCA8	HECT-type E3 ubiquitin transferase	LOC107763564	30364	2032.1	46550.6	58880.4	29612	49964.6
A0A1S3XCC1	histidinol dehydrogenase, chloroplastic-like	LOC107763421	54042	58429.3	62726.5	46287.7	52526.5	56716.1
A0A1S3XCC7	LL-diaminopimelate aminotransferase, chloroplastic-like	LOC107763425	439670	0	429984	481907	188577	215135
A0A1S3XCE8	V-type proton ATPase subunit d1-like isoform X2	LOC107763601	91587	111177	85788.3	7654.1	0	0
A0A1S3XCD8	syntaxin-61-like	LOC107763439	142780	185666	98458.9	97889.6	97839.6	241572
A0A1S3XCE0	uncharacterized protein LOC107763629	LOC107763629	31469	30824.8	29416.1	52046.7	24762	28425.6
A0A1S3XCE9	CDP-diacylglycerol--glycerol-3-phosphate 3-phosphatidyltransferase 2-like	LOC107763451	69440	33015.1	78386.6	87749.2	61961.5	63894.5
A0A1S3XCF3	nucleolar protein 56-like	LOC107763606	77034	29871.3	74583.1	22119.1	56345.9	101688
A0A1S3XCF5	probable N-succinyldiaminopimelate aminotransferase DapC	LOC107763647	1441700	1.18011e+06	1.37439e+06	1.18346e+06	1.44638e+06	1.3946e+06
A0A1S3XCG0	uncharacterized protein LOC107763626	LOC107763626	333530	132686	277302	213407	239194	204188
A0A1S3XCY0	uncharacterized protein LOC107763627 isoform X2	LOC107763627	52740	0	50871.9	31132.7	0	51806.4
A0A1S3XCH4	splicing factor 3B subunit 4-like	LOC107763648	897160	103666	269522	742998	257238	286598
A0A1S3XCI1	endochitinase 3-like	LOC107763561	104780	229407	54849	268693	241249	383233
A0A1S3XCI2	Rab escort protein 1	LOC107763638	548720	573773	730758	769041	1.3872e+06	1003844
A0A1S4BJM1	acetate/butyrate--CoA ligase AAE7, peroxisomal-like	LOC107809019	337330	321775	300126	220783	313466	326042
A0A1S3XCK1	uncharacterized protein LOC107763580 isoform X2	LOC107763580	0	0	0	37450	55807.5	32882.8
A0A1S3XCK6	uncharacterized membrane protein At1g06890-like	LOC107763583	49078	40633.6	52614.5	38765.2	32527.2	477619
A0A1S3XCK8	Malate dehydrogenase	LOC107763505	304270	785542	732992	577036	664375	826386
A0A1S3XCL1	uncharacterized protein LOC107763591 isoform X2	LOC107763591	127280	52738.7	0	0	0	0
A0A1S3XCL3	Clathrin light chain	LOC107763511	515060	464652	443879	32477.4	195318	55563.7
A0A1S3XCL4	aspartate aminotransferase-like isoform X1	LOC107763688	588380	533226	458353	468596	539024	436910
A0A1S3XCM1	uncharacterized protein LOC107763521 isoform X1	LOC107763521	143640	330698	0	440488	19958.2	324152
A0A1S3XCM3	universal stress protein MT2085-like	LOC107763703	970260	867981	586845	402847	967524	540364
A0A1S3XCN1	pto-interacting protein 1	LOC107763528	106160	129285	144113	302964	284879	109508
A0A1S3XCN3	acetylajmalan esterase-like	LOC107763609	197870	120756	211845	37789.3	173215	101707
A0A1S3XCQ1	dnaJ protein homolog	LOC107763704	207840	234010	269562	135845	78977.8	291831
A0A1S3XES7	60S ribosomal protein L12-like	LOC107764287	12157000	1.15693e+07	1.74577e+07	1.04162e+07	1.15713e+07	1.21929e+07
A0A1S3XCR2	probable LRR receptor-like serine/threonine-protein kinase At1g14390	LOC107763733	16683	9995.6	21394.9	17990.8	0	205633
A0A1S3XCT6	Serine hydroxymethyltransferase	LOC107763666	8180900	7.1664e+06	7.16733e+06	8.09428e+06	7.68621e+06	7.42795e+06
A0A1S3XCV4	V-type proton ATPase subunit E-like	LOC107763771	3028100	2.9634e+06	2.66709e+06	2.88507e+06	3.00673e+06	2.93814e+06
A0A1S3XCV6	5-methyltetrahydropteroyltriglutamate--homocysteine S-methyltransferase	LOC107763602	74189000	1.05802e+08	1.2084e+08	1.07898e+08	1.06074e+08	1.0932e+08
A0A1S3XCW5	tetrahydrocannabinolic acid synthase-like	LOC107763691	3199700	2941312	2.28503e+06	3.0815e+06	4.44099e+06	3.21272e+06
A0A1S3XCX6	copper-transporting ATPase PAA1, chloroplastic	LOC107763623	321220	186618	220034	169287	278220	229180
A0A1S3XCX7	GDSL esterase/lipase At1g29670-like	LOC107763773	261870	337554	91344.5	187670	250990	586712
A0A1S3XCX9	CASP-like protein	LOC107763803	129010	152577	64924	104543	265910	188367
A0A1S3XD03	Tubulin-specific chaperone A	LOC107763800	0	539995	0	0	478491	380342
A0A1S3XD08	coatomer subunit beta-1-like	LOC107763805	0	731020	243796	799952	152201	126727
A0A1S3XD13	4-coumarate--CoA ligase	LOC107763835	69292	50682.9	0	0	76743.9	116281
A0A1S3XD32	guanine nucleotide-binding protein subunit beta-like protein	LOC107763849	277990	166978	220932	261363	289061	361452
A0A1S3XDD5	putative serine/threonine-protein kinase isoform X2	LOC107763854	0	0	14080.1	14906.5	31357.9	20546.3
A0A1S3ZDX3	cell number regulator 6-like	LOC107785656	69727	61475.8	59392.7	68934.5	57556.4	62338.8
A0A1S3XD58	GPI-anchor transamidase-like	LOC107763881	73472	285602	332665	341013	12546.4	11296.6
A0A1S3XD60	proton pump-interactor 1-like	LOC107763720	312260	154753	214368	77188.9	261369	200353
A0A1S4A969	Glutathione peroxidase	LOC107795121	41640	0	49422.4	0	51428	85842.5
A0A1S3XD70	protein disulfide isomerase-like 5-2	LOC107763896	363950	445713	111743	346664	189214	115752
A0A1S3ZXE6	Protein-serine/threonine phosphatase	LOC107791500	193780	83554.8	173181	193662	218828	208183
A0A1S4BGX8	GDT1 family protein	LOC107808146	28206	25337.6	39018.2	28222	22998.7	35385.8
A0A1S3XDA5	protein MODIFIER OF SNC1 11-like	LOC107763766	268520	43066.6	48825.9	46193.5	215848	265696
A0A1S3XDC3	uncharacterized protein LOC107763852	LOC107763852	2198000	2.33813e+06	1.2924e+06	2402444	2.19557e+06	2.10318e+06
A0A1S4A502	glutathione S-transferase T1-like	LOC107793760	92017	101766	45194.9	0	53121.5	0
A0A1S3XDD7	Mitochondrial pyruvate carrier	LOC107763801	272980	360813	23999.5	160288	342432	136872
A0A1S4CNP0	Aspartate aminotransferase	LOC107820992	2518300	1899529	2595065	1.87522e+06	2.70093e+06	2.5796e+06
A0A1S3XDE3	uncharacterized protein LOC107763963	LOC107763963	295540	0	76155.2	163147	19785.6	69250.9
A0A1S3XDE5	putative transporter arsB	LOC107763867	18585	18482.4	18645.8	15564.7	17300.9	10180.1
A0A1S3XDF1	nuclear pore complex protein NUP1-like	LOC107763970	47135	33633	32151.3	23256.2	35760.9	47043.1
A0A1S3XDG3	60S ribosomal protein L23a-like	LOC107763824	1991000	6.72462e+06	7.73821e+06	7.51611e+06	6.80929e+06	9.06841e+06
A0A1S3XDG5	glutamyl-tRNA(Gln) amidotransferase subunit A, chloroplastic/mitochondrial-like	LOC107763882	13291	0	34867.5	36074.7	26241.7	31194
A0A1S3XDI1	N-alpha-acetyltransferase 15, NatA auxiliary subunit-like isoform X1	LOC107763992	843170	539361	865025	454502	695377	811170
A0A1S3YG12	Adenine phosphoribosyltransferase	LOC107775793	40854	49015.3	58021.1	69044.6	49952.5	72042
A0A1S3XDM4	calumenin-like	LOC107763880	1463500	524522	1.14157e+06	1.10482e+06	1.05663e+06	649353
A0A1S3YIY3	trihelix transcription factor GT-2-like	LOC107776802	16466	9340.2	16456.2	10069	16480.9	0
A0A1S3XDN8	protein TIC 100	LOC107763893	529970	425636	389903	390614	414690	302428
A0A1S3XDP1	pleiotropic drug resistance protein 3	LOC107764055	99327	0	0	94778	241434	67257
A0A1S3XDP2	pinin-like	LOC107764057	163950	136863	369045	191313	135339	107544
A0A1S3XDP7	Secretory carrier-associated membrane protein	LOC107763960	238760	196722	145589	287656	197691	199635
A0A1S3XDP9	Glutaredoxin-dependent peroxiredoxin	LOC107763907	204360	269429	173719	364809	250528	234451
A0A1S3ZU40	probable serine/threonine-protein kinase At1g01540	LOC107790514	0	46808.6	33345.3	92566.3	27934.1	42084.4
A0A1S4AYI6	uncharacterized protein LOC107802596	LOC107802596	521940	902328	497776	725182	686159	478092
A0A1S3ZQ48	Xyloglucan endotransglucosylase/hydrolase	LOC107789124	46654	0	92626.3	0	0	0
A0A1S3XDT6	protein QUIRKY-like	LOC107764108	41012	0	44356	0	43634.1	41503.5
A0A1S3XDV9	Inositol-pentakisphosphate 2-kinase	LOC107764130	11642	163118	180582	265380	6840.6	13085.5
A0A1S3XDW5	protein transport protein SEC16B homolog	LOC107764134	7117.1	21619.7	25654.4	21606.2	27833.4	33496.7
A0A1S3XDX1	transmembrane protein DDB_G0273707/DDB_G0273361-like	LOC107763980	569430	596650	348536	305108	420907	433614
A0A1S4AKB5	Histone H4	LOC107798555	78315000	9.71678e+07	67836785	8.66927e+07	9.35588e+07	6.46633e+07
A0A1S3XDY1	synaptotagmin-1-like isoform X2	LOC107764054	20738	27359.5	15829.7	25930.9	23861.9	33512.8
A0A1S3XE02	glycosyltransferase family protein 64 protein C5-like	LOC107764017	35702	0	46282.2	34024.1	33392.4	46383.9
A0A1S3XE04	heavy metal-associated isoprenylated plant protein 3-like	LOC107764074	134140	0	0	0	0	123950
A0A1S3XI19	mitochondrial import receptor subunit TOM20	LOC107765437	403200	315148	488130	343680	380174	466710
A0A1S3XE16	60S ribosomal protein L5-like	LOC107764090	16943000	1.48662e+07	1.79555e+07	1.44049e+07	1.48379e+07	1.51209e+07
A0A1S3XE32	60S ribosomal protein L7-1-like	LOC107764206	108170	0	250648	0	45017.1	153741
A0A1S3XE39	uncharacterized protein LOC107764097 isoform X2	LOC107764097	444160	188356	152452	58930.3	132883	213123
A0A1S3XE51	Mitogen-activated protein kinase	LOC107764113	24718	21859.2	25780.1	193639	21586.9	203933
A0A1S3XHX3	protein NUCLEAR FUSION DEFECTIVE 4-like	LOC107765436	336090	625518	322520	699683	470260	296563
A0A1S3XE72	60S ribosomal protein L22-3	LOC107764146	249630	225700	306350	294215	235834	280119
A0A1S3XE74	uncharacterized protein At5g01610-like	LOC107764103	175150	181292	164342	230519	92864.2	49801.2
A0A1S3XE88	Phospholipase D	LOC107764167	236880	57334.7	42772.9	0	251514	0
A0A1S4CLS5	spartin-like	LOC107820244	434140	35430.7	43573	34256.8	43272.4	42400.8
A0A1S3XE96	Phosphoribosylformylglycinamidine cyclo-ligase	LOC107764177	716730	1.45611e+06	1.01029e+06	1.36367e+06	1.12856e+06	1.95942e+06
A0A1S3XEB2	guanylate-binding protein 1-like	LOC107764195	304410	49073.3	38162.4	371028	302532	45561.2
A0A1S3XEF3	Alpha-1,4 glucan phosphorylase	LOC107764127	121450	392033	164871	330993	149745	392404
A0A1S3XEG2	Origin recognition complex subunit 1	LOC107764231	88471	0	87232.7	42274	0	0
A0A1S3XEG3	Conserved oligomeric Golgi complex subunit 4	LOC107764132	195930	55496.5	382292	364230	117665	217836
A0A1S3XEH1	uncharacterized protein LOC107764196	LOC107764196	288840	367385	409455	344588	251833	175493
A0A1S3Y096	Homogentisate 1,2-dioxygenase	LOC107770720	322650	495938	212134	223132	596423	275160
A0A1S4BI00	Pre-mRNA-processing factor 19	LOC107808480	118240	172512	250718	210173	182709	188556
A0A1S3XEJ8	probable inactive receptor kinase At1g48480	LOC107764161	247410	0	131903	272007	219927	0
A0A1S3XEK0	GMP synthase (glutamine-hydrolyzing)	LOC107764380	682940	237269	190737	132849	284386	278173
A0A1S3XEL6	putative disease resistance protein At1g50180	LOC107764185	196570	271692	193909	410064	97210.7	114023
A0A1S3XEM0	uncharacterized protein LOC107764394	LOC107764394	31723	101614	0	93747.6	0	96653.5
A0A1S3XEM4	heat shock 70 kDa protein, mitochondrial-like	LOC107764273	43259	53356.5	88263.1	18128.1	73944.8	68090.1
A0A1S3XEN1	Ribosomal protein L19	LOC107764242	1962000	1.54425e+06	2612821	1.3067e+06	1.69382e+06	1.90955e+06
A0A1S3XEN9	probable acyl-CoA dehydrogenase IBR3	LOC107764289	1378100	1.72599e+06	1.6525e+06	1375581	1.93694e+06	1.61118e+06
A0A1S3XHL4	thylakoid lumenal 15 kDa protein 1, chloroplastic-like	LOC107765234	88481	136174	71433.9	100956	95670.4	99751.6
A0A1S3XEX0	peptide methionine sulfoxide reductase B5-like isoform X2	LOC107764271	200930	303218	202677	1.22829e+06	338856	274669
A0A1S3XER3	pyruvate kinase, cytosolic isozyme-like	LOC107764308	119160	8830.4	140741	106563	0	90227
A0A1S3XER8	S-formylglutathione hydrolase	LOC107764314	1290000	1.53517e+06	3.32037e+06	1.71352e+06	1.26009e+06	2727607
A0A1S4DPC1	vacuolar protein sorting-associated protein 2 homolog 1-like	LOC107831976	168410	168466	176472	164396	173985	160182
A0A1S3XET6	apyrase-like	LOC107764352	4880600	4890158	7246431	5.49767e+06	7007404	6.46794e+06
A0A1S3XYL6	probable inactive ATP-dependent zinc metalloprotease FTSHI 4, chloroplastic	LOC107770227	139330	116054	123693	106696	196160	143360
P27492	Chlorophyll a-b binding protein 16, chloroplastic	CAB16	61500	1.49635e+06	0	140611	31583.9	271816
Q93XM3	Nuclease (Fragment)		70030	82033.7	62431.2	62561.6	67149.6	67577.2
A0A1S3XEV5	Reticulon-like protein	LOC107764258	1648800	425713	789712	1.33734e+06	837508	1.3434e+06
Q9FES7	Mg-protoporphyrin IX chelatase	Su-s	297860	277816	296874	177832	361966	121334
A0A1S3YV60	arogenate dehydrogenase 1, chloroplastic-like isoform X2	LOC107779931	38303	24322.8	23645.4	0	26130.7	32572
A0A1S3XEZ0	glycolipid transfer protein 1-like	LOC107764384	627950	523582	1272744	1.48554e+06	1.50156e+06	1.29712e+06
A0A1S3XF06	WW domain-containing protein C11B10.08-like	LOC107764510	126140	121401	474374	26342.8	33197.2	373258
A0A1S3XF16	uncharacterized protein LOC107764519	LOC107764519	59742	133080	16133	11804	55979.1	70696
A0A1S3XFE6	Ubiquitin receptor RAD23	LOC107764526	237230	70596.7	280754	52288.4	53258.1	38292.1
A0A1S3XF32	zinc finger BED domain-containing protein DAYSLEEPER-like	LOC107764422	59135	0	0	74939.8	0	0
A0A1S3XF43	uncharacterized protein LOC107764347	LOC107764347	413120	0	0	0	0	0
A0A1S3XF52	L-arabinokinase-like	LOC107764455	576110	670254	254309	577524	791494	149396
A0A1S3XF62	Protein transport protein Sec61 subunit beta	LOC107764466	174350	258275	245790	0	323166	0
A0A1S3XF65	Lactoylglutathione lyase	LOC107764558	362130	443668	375200	437934	392084	382080
A0A1S3XF71	mitochondrial Rho GTPase 1-like	LOC107764418	25733	23428.4	28580.1	31111.1	23924.5	31746.5
A0A1S3XF86	L-gulonolactone oxidase	LOC107764580	11026000	1.36491e+07	6.0908e+06	7.29006e+06	1.13534e+07	7.93092e+06
A0A1S3XFA3	Phosphatidylinositol 4-phosphate 5-kinase	LOC107764399	16193	11431.5	6904.6	11238.9	0	0
A0A1S3XFB7	uncharacterized protein LOC107764497	LOC107764497	313280	468108	303677	274640	44307.1	113315
A0A1S3XFC9	ATPase ASNA1 homolog	LOC107764515	0	466052	223416	394779	197177	250243
A0A1S3XFD7	uncharacterized protein LOC107764509	LOC107764509	1778300	2.04453e+06	1.57051e+06	1.8582e+06	2.19372e+06	676556
A0A1S3XFE5	probable 2-oxoglutarate-dependent dioxygenase AOP1.2	LOC107764489	3485300	1.59925e+06	3.29832e+06	851085	3147706	2.65847e+06
A0A1S3XFF8	3-oxoacyl-[acyl-carrier-protein] reductase	LOC107764635	655760	998600	375768	99022.1	357322	618165
A0A1S3XFH3	uncharacterized protein LOC107764653	LOC107764653	92493	81864.2	107972	55245.7	75986.6	63699.9
A0A1S3XY94	IRK-interacting protein-like	LOC107770141	6854.4	5162.1	5335.6	6624.6	7316.2	13362.2
A0A1S3XFK6	uncharacterized protein LOC107764685	LOC107764685	36200	35643.9	62200.8	47087.7	53867.5	56749.1
A0A1S3XFL7	S-adenosylmethionine synthase	LOC107764500	42079	0	0	16464.5	0	0
A0A1S3Y7A5	oligopeptide transporter 7-like	LOC107773211	0	4915.6	0	0	28938	0
A0A1S4BUD6	FAD synthase-like	LOC107811999	33184	30509.9	33568.8	32579.6	32886.9	32827.1
A0A1S3XFN2	zinc finger CCCH domain-containing protein 19-like	LOC107764512	53486	46816.3	49130.2	43287.3	53478	46588.8
A0A1S3XFP4	LYR motif-containing protein 4	LOC107764517	2335.6	339872	0	165111	145080	123771
A0A1S3XFQ0	protein LSM12 homolog	LOC107764607	23028	253945	27260.4	270486	142172	295259
A0A1S3XFR3	macrophage migration inhibitory factor homolog	LOC107764538	480170	537480	663794	528308	575605	385575
A0A1S3XFS0	IST1-like protein	LOC107764592	138260	141860	0	0	154226	136777
A0A1S3XFT6	Glyceraldehyde-3-phosphate dehydrogenase	LOC107764636	2319100	3.13989e+06	2.4196e+06	3.53598e+06	2.44948e+06	3.62311e+06
A0A1S3XZN7	eukaryotic peptide chain release factor subunit 1-3-like	LOC107770602	1384100	1.64573e+06	1.6541e+06	895251	1.458e+06	1.10642e+06
A0A1S3XFU6	protein OSB2, chloroplastic-like	LOC107764681	12954	79081.2	76329.7	54693	42031.1	15217.3
A0A1S3XFW0	50S ribosomal protein L7/L12-like	LOC107764675	31361	21842.8	30346.7	22171.3	22325.7	23922.1
A0A1S3XFW3	serine/arginine-rich splicing factor RS2Z33-like isoform X1	LOC107764629	253210	223217	234259	225118	237971	245964
A0A1S3XG50	uncharacterized protein LOC107764684 isoform X3	LOC107764684	708840	348489	963660	1.03123e+06	837323	829947
A0A1S4BI54	Non-specific serine/threonine protein kinase	LOC107808522	124170	224431	193550	290924	187703	256505
A0A1S3XFX2	Sulfate adenylyltransferase	LOC107764687	24210	127710	45095.2	590755	111150	134425
A0A1S4DS09	transport inhibitor response 1-like protein	LOC107832817	106350	97418.2	145838	124327	127632	88923.5
A0A1S4CFV8	activating signal cointegrator 1 complex subunit 2-like	LOC107818486	101970	26167.6	0	0	0	51561.8
A0A1S3XFZ4	Dihydrolipoamide acetyltransferase component of pyruvate dehydrogenase complex	LOC107764742	510360	496211	550156	409361	509102	659781
A0A1S3XG19	Adenine phosphoribosyltransferase	LOC107764701	3623600	3.97139e+06	3.17523e+06	4.76789e+06	3.21604e+06	4154505
A0A1S3XG29	uncharacterized protein At4g28440-like	LOC107764713	712630	867620	1.16381e+06	736461	855952	1.00743e+06
A0A1S3XG41	protein SUPPRESSOR OF GENE SILENCING 3-like	LOC107764764	552070	274000	517816	620543	476775	607152
I1Z1X6	Glycosyltransferases (Fragment)	IRX9	6432.4	5772.8	7051.8	19454.7	0	86760.5
A0A1S3XG66	novel plant SNARE 11-like	LOC107764828	147120	149187	166178	0	19128.9	0
A0A1S3XG84	probable 2-oxoglutarate-dependent dioxygenase AOP1.2 isoform X1	LOC107764865	128600	121838	278160	155295	149858	242064
A0A1S4CIF9	UPF0047 protein YjbQ-like	LOC107819206	0	0	82069.5	102660	86877.6	0
A0A1S3XGF9	uncharacterized protein LOC107764830 isoform X3	LOC107764830	276790	228215	280036	235229	18399.4	311600
A0A1S3XLC6	60S ribosomal protein L13	LOC107766512	1479100	1001028	1.24402e+06	1.16338e+06	1320304	1348880
A0A1S3XGC4	KH domain-containing protein At4g18375-like	LOC107764849	0	0	0	0	29062.3	0
A0A1S3ZGQ9	WD repeat-containing protein 55	LOC107786560	0	172555	67663.2	83750.2	112918	151550
A0A1S3XGD9	uncharacterized protein LOC107764905	LOC107764905	503770	247832	270429	325637	262437	223759
A0A1S4CA85	BTB/POZ and MATH domain-containing protein 3-like	LOC107816787	48787	42110.9	20778.5	0	0	69549.4
A0A1S3XGE1	protein STRUBBELIG-RECEPTOR FAMILY 3-like	LOC107764875	97872	52481.7	52235.5	53886.2	113678	47850.7
A0A1S3XGF1	Pectinesterase	LOC107764818	0	0	16884.1	0	0	0
A0A1S3XGF4	NAC domain-containing protein 62-like	LOC107764928	258690	183600	103613	0	0	0
A0A1S3XGG7	ribose-phosphate pyrophosphokinase 4	LOC107764845	404440	580116	604910	788412	611117	693274
A0A1S3XGH0	uncharacterized protein LOC107764953	LOC107764953	129110	510612	429365	285534	383534	150322
A0A1S3XGJ2	stomatal closure-related actin-binding protein 1	LOC107764939	0	23656.9	17124.5	0	17021.4	0
A0A1S3XGK4	heat shock cognate protein 80-like	LOC107764955	478260	1.21642e+06	1.56981e+06	1.36049e+06	1.39295e+06	893438
A0A1S3XGK7	protein CWC15 homolog	LOC107765024	88937	51344.5	78874.4	84702.3	150855	58676.9
A0A1S3XGK9	1-aminocyclopropane-1-carboxylate oxidase 1-like	LOC107765010	121490	38421.4	326241	121319	95330.3	278900
A0A1S4DQJ3	Malic enzyme	LOC107832374	0	0	16444.2	0	0	13813.7
A0A1S3XGL8	Inositol-tetrakisphosphate 1-kinase	LOC107764911	90608	0	75371.1	0	92022.6	95369
A0A1S4DD70	Pectate lyase	LOC107828480	78959	112828	32723.9	75035.1	116751	17160.2
A0A1S3XGN9	nardilysin-like isoform X2	LOC107765001	421490	456364	530654	324127	909652	347926
A0A1S3XGS6	dnaJ protein ERDJ2A-like isoform X2	LOC107765055	29734	20568.8	48762.1	0	22665.8	25643.9
A0A1S3XGP8	uncharacterized protein LOC107765033	LOC107765033	757970	712616	748554	699331	779461	621084
A0A1S3ZQP2	MACPF domain-containing protein NSL1-like	LOC107789400	53653	45490.9	44665.2	32655.6	63595.3	50114.7
A0A1S3ZN81	calcineurin B-like protein 3	LOC107788654	18020	0	13962.4	16238.7	15760.6	12151.3
A0A1S3XGT0	protein QUIRKY-like	LOC107764986	322100	212042	204742	248857	193940	352866
A0A1S3XGU4	hsp70-Hsp90 organizing protein 2-like	LOC107764856	1801500	1.71352e+06	1.92832e+06	1.93945e+06	1709747	1.83966e+06
A0A1S3XGV2	exosome complex exonuclease RRP44 homolog A-like	LOC107765045	99196	86040.3	97937.1	129660	0	96483.5
A0A1S3ZH54	putative ribosome biogenesis protein C8F11.04	LOC107786706	293770	277980	333284	165894	458875	439451
L7QNZ1	Arginine/serine-rich 45 protein	SR45	706690	514123	99720.7	498135	615803	547231
A0A1S3XGW1	Glucose-6-phosphate 1-epimerase	LOC107765053	115840	110947	182557	190836	199982	174039
A0A1S3ZWZ3	cysteine-rich repeat secretory protein 12-like	LOC107791378	108940	164102	91112.1	145411	139819	157906
A0A1S4B3E5	pathogenesis-related protein 5-like	LOC107804128	19989	23518	7500.8	34120.6	20562.4	23356.3
A0A1S4AWJ2	vesicle-associated membrane protein 714-like	LOC107802062	290310	284672	249801	278305	359582	302825
A0A1S3XH24	REF/SRPP-like protein At1g67360	LOC107765167	52215	55034	55524.3	39649.2	0	45559.3
A0A1S3XH26	NAD(P)H dehydrogenase (quinone)	LOC107765136	0	0	0	0	0	55806.5
A0A1S3XH29	uncharacterized protein LOC107765168	LOC107765168	565340	452755	564341	386529	292236	263674
A0A1S3XH44	Clathrin light chain	LOC107765182	103440	129471	37959.9	66069.2	49286.6	43413.3
A0A1S3XH45	costars family protein-like	LOC107765076	0	0	684024	675750	689674	904329
A0A1S3XH99	uncharacterized protein At1g08160-like	LOC107765229	0	3135.7	0	65240.8	57023.1	30443.1
W8SI43	Farnesyl pyrophosphate synthase 1		260850	771917	652652	877265	676048	775769
A0A1S4B398	survival of motor neuron-related-splicing factor 30-like isoform X1	LOC107804027	143530	17238	97760.6	136117	27831.3	123129
A0A1S4C6S2	26S protease regulatory subunit S10B homolog B-like	LOC107815805	4037800	3.04585e+06	3.79419e+06	2.76478e+06	3.34058e+06	3.19808e+06
A0A1S3XHC6	cinnamoyl-CoA reductase 2-like	LOC107765220	158690	133167	141369	158495	157062	147620
A0A1S3XHC9	Isoleucine--tRNA ligase	LOC107765258	4513800	3.59709e+06	4.84269e+06	3.78994e+06	3.44672e+06	3309625
A0A1S3XHE9	endo-1,31,4-beta-D-glucanase-like isoform X2	LOC107765277	65323	284388	317762	53872.6	176082	42441.4
A0A1S3XHF5	S-adenosylmethionine synthase	LOC107765217	7216.2	0	27005	3755.7	0	59742.3
A0A1S3XHF8	auxin transport protein BIG-like	LOC107765175	311650	236274	342660	87707.2	250970	394350
A0A1S3XHG4	phosphoglucomutase, cytoplasmic-like	LOC107765291	170310	156218	159365	38443	131034	81813.1
A0A1S3XHG5	cyclase-associated protein 1-like	LOC107765227	35012	63873.9	232124	119617	291651	81423
A0A1S3XHI6	splicing factor 3A subunit 3-like	LOC107765278	0	79325.1	75746.2	80093.9	72762.1	0
A0A1S3XHJ8	heat shock protein 82-like	LOC107765261	0	0	46637.4	0	9677.7	6238.3
A0A1S3XHK5	putative E3 ubiquitin-protein ligase XBAT34 isoform X2	LOC107765272	142830	120450	170308	122193	22085.2	0
A0A1S3XHL0	40S ribosomal protein S20-2	LOC107765328	755150	773513	1.24751e+06	682718	908368	1537880
A0A1S4BEK5	uncharacterized protein LOC107807417	LOC107807417	648210	655754	524948	377939	505217	692688
A0A1S3ZE64	ATP-dependent Clp protease proteolytic subunit	LOC107785710	949420	1.74381e+06	1.40212e+06	2552235	1.87899e+06	1.09612e+06
A0A1S3XHP5	HMG-Y-related protein B-like	LOC107765117	1844400	1.98417e+06	1.56023e+06	1.96918e+06	2390296	1.43644e+06
A0A1S4DRL1	SNF1-related protein kinase regulatory subunit beta-2-like	LOC107832716	42770	54009.3	67004.8	79678.6	74688.8	71900.3
A0A1S3XHQ1	Flavin-containing monooxygenase	LOC107765266	539960	326761	629679	342046	472675	398827
A0A1S3XHR0	miraculin-like	LOC107765132	614710	876740	7060.9	297403	104173	437996
A0A1S4AML2	2-oxoisovalerate dehydrogenase subunit beta 1, mitochondrial-like	LOC107799279	17945	221632	158477	116202	112527	128012
A0A1S3XHU5	UDP-arabinopyranose mutase	LOC107765349	40733	34726.5	41898.1	45850.8	31503.8	39890.2
A0A1S4ALW2	UPF0051 protein ABCI8, chloroplastic-like	LOC107799048	2365600	2.25229e+06	2.61492e+06	1.923e+06	2.49398e+06	2.37039e+06
A0A1S3XHV7	ABC transporter B family member 25-like	LOC107765170	169290	55837.7	1.39315e+06	80266.4	154226	150492
A0A1S3XHW4	Poly [ADP-ribose] polymerase	LOC107765431	65658	81834.7	64032.2	82260.2	0	59773.5
A0A1S3XHX0	sm-like protein LSM7	LOC107765381	501600	452449	654417	447274	90821.4	0
Q02585	Cytochrome b6-f complex iron-sulfur subunit 2, chloroplastic	petC2	0	79141.4	0	0	0	0
A0A1S3XI04	Vacuolar proton pump subunit B	LOC107765413	30110000	4.09507e+07	45268747	3.62812e+07	4.89105e+07	3.98458e+07
A0A1S3XI13	probable RNA-binding protein ARP1 isoform X2	LOC107765461	0	83833.6	57933.3	66339.3	10529.3	28710.8
A0A1S3XI22	cinnamoyl-CoA reductase 2-like	LOC107765221	0	0	198548	0	0	194327
A0A1S4CR99	ribosome maturation protein SBDS-like	LOC107821704	70039	37472.3	224124	57677.5	52529.6	72014.6
A0A1S4BXM6	fasciclin-like arabinogalactan protein 11	LOC107812975	132870	190828	51470.4	551991	104728	293701
A0A1S3XY09	peroxisome biogenesis protein 22-like	LOC107769851	79741	88511.6	81355.3	85119.9	73740.4	88141.4
A0A1S3XI59	beta-fructofuranosidase, insoluble isoenzyme CWINV3-like isoform X2	LOC107765510	817720	1.27175e+06	606097	569285	1.63237e+06	1251877
A0A1S3XI60	T-complex protein 1 subunit delta	LOC107765406	4453500	2.75924e+06	5.21228e+06	2919450	4.07487e+06	4920328
A0A1S4BDB7	CCAAT/enhancer-binding protein zeta-like	LOC107807038	5486.7	14556.7	72637.9	55438.6	71573.2	60923
A0A1S3XI79	60S ribosomal protein L5-like	LOC107765428	393530	262354	463391	274696	314524	348842
A0A1S3XI81	Peroxidase	LOC107765489	1056200	1.86213e+06	577837	417917	904371	1.02897e+06
A0A1S4C251	mitochondrial amidoxime reducing component 2-like isoform X2	LOC107814341	148650	159838	145469	156770	50617.3	36013
A0A1S3XJ41	probable DNA primase large subunit isoform X2	LOC107765547	57664	42406.2	66126	72988	48817	51936.7
A0A1S3XIA7	Ribosomal protein L15	LOC107765511	1188000	787576	1.27993e+06	50293.5	1.32143e+06	1.32706e+06
A0A1S3XIC2	phosphoinositide phosphatase SAC2-like	LOC107765460	23777	32621.5	24792.5	13684.3	24063.3	30120
A0A1S3XID4	beta-glucosidase BoGH3B-like	LOC107765532	53644	0	81359.3	52000.2	80996.9	49292.1
A0A1S4CVX0	Exportin-T	LOC107823193	81696	55420	99100.3	62748.8	46591.4	86865.4
A0A1S4D236	uncharacterized protein LOC107825183	LOC107825183	37026	30817.2	32047.5	41930.1	0	0
A0A1S3XIG8	Leucine carboxyl methyltransferase 1 homolog	LOC107765344	115000	58361.5	121080	113120	115199	111832
A0A1S3XIH4	NADH-cytochrome b5 reductase	LOC107765620	1543500	1.75683e+06	1.16491e+06	1.24894e+06	1.2084e+06	1.4064e+06
A0A1S3YPT1	RNA-binding protein 2-like isoform X1	LOC107778330	1538600	1.51221e+06	1.16072e+06	520138	1.08623e+06	1.48924e+06
A0A1S3XII8	Spermidine synthase	LOC107765582	28286	18852	35267.5	25058.2	26293.1	27674.7
A0A1S3XIJ4	protein KAKU4-like	LOC107765639	197350	19710.4	138487	16193.3	153969	168145
A0A1S3XIK5	beta-glucosidase BoGH3B-like isoform X2	LOC107765533	232210	292939	8907.1	5783.2	252881	236765
A0A1S3XIK8	multiprotein-bridging factor 1b	LOC107765599	636640	544817	648083	1.17711e+06	618084	1.02207e+06
A0A1S3XIN4	MACPF domain-containing protein At4g24290-like	LOC107765674	121730	0	101877	115895	50929.7	0
A0A1S3XIQ5	H/ACA ribonucleoprotein complex subunit 4-like	LOC107765583	493110	263098	321932	454264	625811	442615
A0A1S3ZZK2	Protein arginine N-methyltransferase 2	LOC107792104	62120	49520.5	72726.7	55479.4	59136.8	59003.7
A0A1S3XIR7	ferredoxin--nitrite reductase, chloroplastic-like	LOC107765655	21455000	2.15596e+07	2.51756e+07	1.70353e+07	2.036e+07	1.6941e+07
A0A1S3XIS4	UDP-glucuronate decarboxylase	LOC107765666	190840	112609	412487	118153	39596.8	47506
A0A1S3XYD3	zinc finger CCCH domain-containing protein 14-like	LOC107769987	0	0	0	108618	0	0
A0A1S3XIT8	pentatricopeptide repeat-containing protein At3g02490, mitochondrial-like	LOC107765721	527180	437872	412986	430490	261790	375166
A0A1S3XIV0	cytochrome P450 71D7-like	LOC107765463	18505	20853.2	7676.7	27082.7	18876.2	15475.1
A0A1S4BH40	uncharacterized protein LOC107808191	LOC107808191	99984	136316	0	123056	7594.5	0
A0A1S3XIV8	probable protein S-acyltransferase 9	LOC107765735	0	51909.8	0	0	56467.2	48391
A0A1S3XIW1	U3 small nucleolar RNA-associated protein 18 homolog	LOC107765637	53184	54578	128890	56296.5	60140.7	53733.2
A0A1S3XIW2	uncharacterized protein At4g14100-like	LOC107765693	58813	120472	32955.3	0	58656.9	0
A0A1S3XIW5	phospholipase A-2-activating protein-like	LOC107765477	129660	116174	131205	92483.5	89672.6	86244.8
A0A1S3XIW7	CSC1-like protein ERD4	LOC107765699	152120	370688	82594.2	226718	148574	178875
A0A1S3XIX1	Glutathione transferase	LOC107765621	746640	661669	1.00501e+06	464954	698470	1.02821e+06
A0A1S3XIX6	2,3-dimethylmalate lyase-like	LOC107765651	71900	61770	69552.5	53949.7	50075.8	124800
A0A1S3XIY1	probable Xaa-Pro aminopeptidase P	LOC107765714	1369300	1.13079e+06	801842	1.09648e+06	1.559e+06	1.54109e+06
Q03662	Probable glutathione S-transferase		869880	792168	831768	350250	883265	477657
A0A1S3XIZ8	Ribosomal protein	LOC107765506	545300	396986	548739	393848	451939	488869
A0A1S3XYB7	Pectinesterase	LOC107770134	89039	0	40259.2	0	0	0
A0A1S4BXT1	alcohol dehydrogenase-like 6	LOC107812917	162440	127470	137728	207551	123409	0
A0A1S3XJ20	miraculin-like	LOC107765742	31238000	3.69671e+07	2.08563e+07	3.40888e+07	3.66981e+07	2.50952e+07
A0A1S3XJ23	Structural maintenance of chromosomes protein	LOC107765531	1410700	1.42593e+06	949745	1471697	1210253	379776
A0A1S3XJ24	NADPH--cytochrome P450 reductase-like	LOC107765750	148560	57646.3	91241.7	149099	50726.2	140565
A0A1S3XJ44	peroxisomal membrane protein PMP22-like isoform X2	LOC107765805	148750	193649	137938	193072	141145	63980.4
A0A1S4BUC0	NADH dehydrogenase [ubiquinone] 1 beta subcomplex subunit 10-A-like	LOC107811984	1430300	1.26344e+06	1.32621e+06	1.35062e+06	27088.4	1.05173e+06
A0A224AL11	Cysteine and histidine-rich domain-containing protein	RAR1	110220	86705.2	111244	87827.5	95949.9	91593.7
A0A1S3XMQ8	dephospho-CoA kinase-like isoform X2	LOC107766886	62151	44936.5	48166.6	33619	38457.2	46045.7
A0A1S3XJ89	miraculin-like	LOC107765744	25664000	29954405	1.65579e+07	3.63482e+06	3.10383e+07	2.36859e+07
Q40565	Ribulose bisphosphate carboxylase/oxygenase activase 2, chloroplastic	RCA	37408	59813.7	0	0	0	28101.6
Q5R216	Myosin XI	Ntmy170	1071000	1.02956e+06	488329	447943	599105	1.03048e+06
A0A1S3XJC8	40S ribosomal protein S3a	LOC107765835	1165700	969841	1.15474e+06	1.12945e+06	984797	1.32083e+06
A0A1S3XJD5	Protein Abitram	LOC107765843	0	0	0	0	307989	34810.6
A0A1S3XJD7	selenium-binding protein 1-like	LOC107765905	531300	491629	420457	382342	463817	586202
A0A1S3XJE3	la-related protein 1C-like isoform X2	LOC107765844	164660	258220	263377	179466	91160.5	252784
A0A1S3XJF2	glycerate dehydrogenase	LOC107765918	0	61364.3	0	10765.8	14907.8	0
A0A1S3XJF5	Phosphoribosylformylglycinamidine synthase	LOC107765791	217280	201511	223845	0	214409	221274
A0A1S3ZNY7	heat stress transcription factor A-1b-like	LOC107788773	88284	23804.5	18595.9	71882.7	93878.4	71422.3
E2F3S9	G-strand specific single-stranded telomere-binding protein 2	GTBP2	192870	178908	248943	259025	221500	117877
A0A1S3XJQ4	Procollagen-proline 4-dioxygenase	LOC107766012	542180	395466	507212	483042	453984	449964
A0A1S3XJQ7	cytochrome P450 CYP72A219-like	LOC107765962	66280	38574.5	80648	27105.4	47935.4	59332.4
A0A1S3XJS5	WD-40 repeat-containing protein MSI2-like	LOC107765912	446720	296679	462832	313926	435816	484892
A0A1S3XJT6	putative methyltransferase C9orf114	LOC107765992	71235	69100.8	93971	0	76818.9	73790.3
A0A1S4AVR3	alpha-glucosidase 2-like	LOC107801815	106670	86039.2	99237.9	170682	65013.3	103955
Q9SXP5	Transcription factor NtWRKY2		326590	162768	0	0	169567	0
A0A1S3XJX0	Eukaryotic translation initiation factor 3 subunit F	LOC107765783	299490	296635	279936	319066	306766	386756
A0A1S3XJY1	inactive tetrahydrocannabinolic acid synthase-like	LOC107766044	51485	125206	136661	283650	297086	23861.6
A0A1S3XJZ1	Plasma membrane ATPase	LOC107765797	786810	700445	841573	704347	774118	726276
A0A1S3XJZ9	dipeptidyl-peptidase 5-like	LOC107766093	862380	1.14774e+06	1.09937e+06	1360148	784876	1.06307e+06
A0A1S3XK05	Presenilin	LOC107765978	55441	0	0	0	0	0
A0A1S3XK13	4-coumarate--CoA ligase	LOC107766072	440330	210216	253182	822058	681967	479933
A0A1S3XK16	multicopper oxidase LPR1-like	LOC107765823	197910	643145	202847	466111	277964	231494
A0A1S4C873	uncharacterized protein LOC107816162	LOC107816162	36424	28625.8	35178.8	27170.1	31980.6	27073.9
A0A1S4CVN6	calvin cycle protein CP12-3, chloroplastic-like	LOC107823204	28628	50740.9	25149.6	340843	249973	329442
A0A1S3XK37	60S ribosomal protein L10-like	LOC107766087	338150	264672	408627	336610	305296	354897
A0A1S3Z901	uncharacterized protein At4g15545-like	LOC107784131	257080	269385	201291	361257	355164	123979
A0A1S3XKB8	protein TIC110, chloroplastic-like isoform X2	LOC107766127	0	229243	0	0	193386	255296
Q9SNY7	Sucrose-phosphate synthase	SPSA	593710	805815	765711	739593	499946	599397
A0A1S3ZLM0	coatomer subunit beta-1-like	LOC107788062	159920	67889.2	475860	202297	135709	8.94411e+06
A0A1S4A6J2	Peroxidase	LOC107794292	1718100	1.57432e+06	925276	2658337	1.47824e+06	948022
A0A1S3XK93	uncharacterized protein LOC107766169	LOC107766169	100820	78203.2	141459	110582	129842	86163.6
A0A1S3XKA7	GrpE protein homolog	LOC107766184	0	0	16742.5	44173.6	54889.9	110755
A0A1S3XKF1	3-isopropylmalate dehydratase small subunit 3-like	LOC107766175	635090	540104	681720	612396	731320	0
A0A1S3XKF9	eukaryotic translation initiation factor 2 subunit beta-like	LOC107766230	281230	0	403031	402813	323464	91443.5
A0A1S3XKG9	DNA-directed RNA polymerase I subunit rpa49-like isoform X1	LOC107766237	140820	86713.9	144372	86458.9	154462	101848
A0A1S3XKH0	9-divinyl ether synthase-like isoform X1	LOC107766195	8810500	9587531	11302972	1.11811e+07	6.93147e+06	1.01924e+07
A0A1S3XKH1	chromatin structure-remodeling complex protein BSH-like isoform X2	LOC107766183	21149	21172.5	17741	16516.7	17074.9	19567.8
Q9SMB6	Phragmoplastin	phragmoplastin	2064000	1.97695e+06	2.52943e+06	2862938	2429754	1.86998e+06
A0A1S4D0D7	uncharacterized protein LOC107824477	LOC107824477	49320	43740.2	55156.2	47254.5	55987.3	60550.8
A0A1S3XKJ4	uncharacterized protein LOC107766210	LOC107766210	160040	153900	152472	149144	139593	0
Q40522	Ras-related protein Rab11D	RAB11D	33829	29301.6	28131.2	0	22329.8	29078.2
A0A1S3XKL8	Eukaryotic translation initiation factor 3 subunit L	LOC107766223	2990900	3.2066e+06	2.96076e+06	3.20848e+06	2.2377e+06	3.11675e+06
A0A1S4BBH9	Peptide deformylase	LOC107806610	30495	25909.5	34744.8	26000.1	26970.2	37231.4
A0A1S3XKN4	LOW QUALITY PROTEIN: histone H1-like	LOC107766305	921480	1.07381e+06	1.06835e+06	636635	2181908	600172
A0A1S3XKP8	Adenylosuccinate synthetase, chloroplastic	LOC107766315	3244900	2.66258e+06	3.40915e+06	3284282	3153974	2.76492e+06
A0A1S4BCY0	probable LRR receptor-like serine/threonine-protein kinase At1g67720	LOC107806984	42582	0	22855.3	39817.2	42472.9	5993.2
A0A1S3XKV9	paired amphipathic helix protein Sin3-like 2 isoform X2	LOC107766319	25127	0	25318.2	22265.5	0	1316.5
A0A1S3XKR7	UPF0613 protein PB24D3.06c isoform X1	LOC107766197	260750	65865.1	268155	298572	141648	340814
A0A1S3XKS0	uncharacterized protein LOC107766287	LOC107766287	132360	444368	286589	403176	230182	427248
Q67BD0	Heat shock protein 70-3	HSP70-3	10427000	1.68356e+07	1.54676e+07	1.85287e+07	1.05304e+07	1.62421e+07
A0A1S3XKT6	65-kDa microtubule-associated protein 1-like	LOC107766346	304450	507277	3130637	417792	279628	1.0625e+06
A0A1S4CDL7	protein MATERNALLY EXPRESSED GENE 5-like isoform X7	LOC107817690	172770	46925.6	363319	0	36966.3	57591.6
A0A1S3XKW0	regulator of nonsense transcripts UPF2-like	LOC107766367	191820	102401	184403	286362	359469	271542
A0A1S3XKZ4	UDP-glucuronate decarboxylase	LOC107766396	34004	38697	33652.6	63400.2	29802.1	71797.3
A0A1S3XKZ9	fasciclin-like arabinogalactan protein 17	LOC107766400	0	0	279417	232641	290212	688079
A0A1S3XL06	Amidophosphoribosyltransferase	LOC107766358	590520	835078	519272	657469	598499	298594
A0A1S3XL14	sister chromatid cohesion protein DCC1-like	LOC107766416	0	0	21251.3	0	0	19501.7
A0A1S3XL53	Pectinesterase	LOC107766157	102590	134326	68067.2	139362	82715	176400
A0A1S3XL87	DNA replication ATP-dependent helicase/nuclease dna2-like isoform X2	LOC107766417	0	98645.2	0	68288.8	0	175219
A0A1S3XL94	protein RETICULATA-RELATED 3, chloroplastic-like	LOC107766482	290710	228904	104491	285397	498785	267849
A0A1S3XL99	heat shock 70 kDa protein 15-like	LOC107766483	54402	32192.8	67321.1	50377.4	44089.3	46251.6
A0A1S3XZR3	dnaJ homolog subfamily C member 17-like	LOC107770533	93677	125053	21127.6	174609	28053.2	91694.7
Q6Q8A4	Phosphotransferase	Hxk3	1359200	1.22287e+06	1.25958e+06	1.40815e+06	1.3351e+06	1.2412e+06
A0A1S3XLB0	tRNA-dihydrouridine(47) synthase [NAD(P)(+)]-like	LOC107766363	243610	118339	345034	344871	330184	247296
A0A1S3XLB6	9-divinyl ether synthase-like	LOC107766501	320870	559438	592271	622688	6669.3	614699
A0A1S3XLF9	Sucrose synthase	LOC107766404	274610	69709.9	174467	493607	62044.7	308681
A0A1S3XLG4	rhomboid-like protein 20	LOC107766409	167750	72592.4	206348	0	145687	110954
A0A1S3XLH4	Inositol-3-phosphate synthase	LOC107766502	49793	40692.6	44149.5	107592	50719	96171.8
A0A1S3XLI2	Lysine--tRNA ligase	LOC107766274	206570	156896	629529	527060	172341	535320
A0A1S4C3D9	uncharacterized protein LOC107814637	LOC107814637	23861	17650.3	0	13492.5	30731.1	0
A0A1S3XLJ9	pumilio homolog 2-like	LOC107766528	305380	639034	600970	551753	110154	356153
A0A1S3XLK0	uncharacterized protein LOC107766443	LOC107766443	94827	78877.9	76521.3	68029	90965.2	47169.7
A0A1S3XLL4	ankyrin repeat domain-containing protein 29	LOC107766309	55190	24363.3	158686	71596.7	41966.3	143748
A0A1S3XLN6	Coatomer subunit beta	LOC107766461	651010	569006	666866	536785	510057	544464
A0A1S3XLR9	alpha,alpha-trehalose-phosphate synthase [UDP-forming] 5-like	LOC107766640	212360	154490	228872	405934	180623	275878
A0A1S3XM12	Beta-galactosidase	LOC107766584	211410	82689.8	84942.4	251240	93227.9	90295
A0A1S3XLT8	protein translation factor SUI1 homolog	LOC107766657	179650	186312	279627	51912.8	216187	242111
A0A1S3XLU0	mitochondrial import inner membrane translocase subunit TIM44-2-like	LOC107766603	67117	51056.9	68972	61135.2	63155.5	0
A0A1S3XLV5	beta-glucosidase 18-like isoform X1	LOC107766388	73691	55685.7	69040.8	44070.3	60118.1	58887.5
A0A1S3XLW4	uncharacterized protein LOC107766666 isoform X3	LOC107766666	129800	69399.3	210847	288427	93207.4	314660
A0A1S3XLW9	ADP-ribosylation factor GTPase-activating protein AGD4-like	LOC107766398	0	58585.7	229072	63500.1	74402.1	64011.6
A0A1S4A1N0	fruit protein pKIWI502-like	LOC107792815	258240	392098	343678	244670	315387	140942
A0A1S3XLY1	polyadenylate-binding protein 2-like	LOC107766555	191230	120625	150756	140724	338589	249506
A0A1S3XLY3	aldehyde dehydrogenase 22A1-like	LOC107766679	311380	135726	272075	275014	173225	220755
A0A1S3XLZ6	transmembrane and coiled-coil domain-containing protein 4-like	LOC107766573	76381	72258.9	67470.7	68655.4	75991.7	64533.9
A0A1S4CJU6	eukaryotic initiation factor 4A-I-like isoform X2	LOC107819858	0	0	0	5024.4	0	6063.7
A0A1S3XM16	DNA-directed RNA polymerase subunit	LOC107766442	509150	433859	734449	454752	637114	758097
A0A1S3XM26	caltractin-like	LOC107766669	723000	155846	577229	892335	759763	592530
A0A1S3XM28	enhancer of mRNA-decapping protein 4-like	LOC107766595	194930	140997	181101	142426	151708	178922
A0A1S4BYG9	importin subunit beta-1-like	LOC107813226	883500	825925	767537	912341	987582	650647
A0A1S3XM49	protein CROWDED NUCLEI 1-like	LOC107766477	45145	42951.8	22325.6	73848.1	48211.8	88469.2
A0A1S3XM66	Aminoacyl-tRNA hydrolase	LOC107766742	19362	11590.1	20058.3	20036.8	17704.8	19575.3
A0A1S3XM68	uncharacterized protein LOC107766695	LOC107766695	301540	357303	136102	372934	373464	412721
A0A1S3XM70	vesicle-associated protein 1-2-like	LOC107766713	345680	372328	341194	371278	409090	383554
A0A1S3XM71	protein SRG1-like	LOC107766747	125340	153244	84878.5	197009	132554	237473
A0A1S3XM81	vacuolar protein sorting-associated protein 45 homolog	LOC107766753	364070	364750	309014	309704	260454	275812
A0A1S3XM83	S-adenosylmethionine synthase	LOC107766708	30901	39634.1	0	0	15937.4	27414.9
A0A1S3XM92	uncharacterized protein LOC107766651	LOC107766651	59169	64589	94044.8	41489.8	31259.2	74116.1
A0A1S3XM95	Cleavage and polyadenylation specificity factor subunit 2	LOC107766765	0	22509.8	41042.2	20676.8	34099.4	15593.2
A0A1S3XMA7	60S acidic ribosomal protein P2-2-like	LOC107766732	4761500	0	0	5.5594e+06	5.3255e+06	5.35188e+06
A0A1S3XMB3	uncharacterized protein At2g24330-like	LOC107766754	141760	160877	136292	205429	119690	158511
A0A1S4B7W2	protein EXPORTIN 1A-like	LOC107805347	4278000	3.50567e+06	4.21615e+06	4.79275e+06	4.44427e+06	3512415
A0A1S3XN61	uncharacterized protein LOC107766766 isoform X2	LOC107766766	115730	107167	0	0	0	122279
A0A1S3XMD5	ATP citrate synthase	LOC107766682	15540000	1.23479e+07	1.57629e+07	1.46999e+07	16157258	1.36088e+07
A0A1S4B871	ADP-ribosylation factor	LOC107805428	352490	319315	322311	379641	522532	184646
A0A1S4BTD8	Pyruvate decarboxylase	LOC107811683	7117.6	23325.6	53233	27241.5	16112	58151.7
A0A1S4AKE8	probable inactive receptor kinase At5g10020	LOC107798672	14278	35105.9	42673.2	13163.5	44802.4	20782.4
A0A1S3ZLQ6	transmembrane protein 205-like	LOC107788056	589050	438890	274519	608866	625606	709775
A0A1S3XMH7	CTP synthase	LOC107766820	27306	203206	120312	174121	48096.7	145297
A0A1S3XMH8	LOW QUALITY PROTEIN: DExH-box ATP-dependent RNA helicase DExH9-like	LOC107766793	0	54073.9	101498	59358.1	71679.1	67165.4
A0A1S3XMQ1	protein VAC14 homolog isoform X2	LOC107766851	32728	28097.6	0	31889.6	0	26466.6
A0A1S3XMP8	uncharacterized protein LOC107766836 isoform X3	LOC107766836	16657	17518	27046.9	15268.5	0	0
A0A1S3YAP7	bifunctional epoxide hydrolase 2-like	LOC107774212	38223	45129	123264	69877.5	48391.6	293739
A0A1S3XMN8	acyl-coenzyme A thioesterase 13-like	LOC107766829	95725	0	23608.5	0	0	16919.3
P0DI50	Casparian strip membrane protein 1		74548	86546.6	34689	52185.2	73495.8	66470.2
A0A1S3XMS7	uncharacterized protein LOC107766904	LOC107766904	56030	52830.5	68052.3	0	12293.7	7313.2
A0A1S3XMS9	Potassium transporter	LOC107766857	75064	55016.5	35803.2	45066.7	0	12745.5
A0A1S4BZ69	4-hydroxy-tetrahydrodipicolinate reductase 1, chloroplastic-like	LOC107813436	76464	66493.9	84567.3	80693.1	0	96757.4
A0A1S3XMU0	Coproporphyrinogen oxidase	LOC107766888	39535	39427.4	44201.4	45731.7	39009	38882.4
A0A1S3XMU2	probable carboxylesterase 15	LOC107766876	134430	131199	50390	185979	134003	143238
A0A1S3XMU7	UDP-D-apiose/UDP-D-xylose synthase 2-like	LOC107766884	5469.8	10844.7	9508.4	81677	4194	139280
A0A1S4D4H2	Protein-synthesizing GTPase	LOC107825776	45893	0	57215.1	31887.3	40529.8	48362.7
A0A1S3ZDH2	50S ribosomal protein L18-like	LOC107785563	23105	23640.5	48866.8	23465	21655.7	27010.7
A0A1S4A2K5	Peroxisomal membrane protein PEX14	LOC107793145	54773	169974	173430	111475	97134.7	87745.7
A0A1S4DSA8	cyprosin-like	LOC107832672	6819.3	146442	9091.5	47850.3	0	83385.7
A0A1S3XMY7	GDSL esterase/lipase 2-like	LOC107766907	754240	293081	201740	241209	876277	221152
A0A1S3XN01	kirola-like	LOC107766931	1281600	1.82058e+06	1.48302e+06	1.08799e+06	1.39326e+06	2.15192e+06
A0A1S3XN18	UDP-glycosyltransferase 91A1-like	LOC107766966	682370	307297	464758	603454	445876	413750
A0A1S3XN28	DNA-directed RNA polymerases II and IV subunit 5A-like	LOC107766974	48506	203512	33002.2	264903	38318.5	195347
A0A1S3XN29	dCTP pyrophosphatase 1	LOC107766741	45699	22853.2	63787.8	27808.9	86245.7	68575.5
D6RSA0	Fucosyltransferase	FucT	0	33663.6	42803.9	30538.1	32126.5	30835.1
A0A1S3XN44	zinc finger CCCH domain-containing protein 55-like	LOC107766755	111890	101566	117469	103912	113884	95444.5
A0A1S3XN77	polyadenylate-binding protein RBP47-like	LOC107767030	33311	16637.7	39687.6	21311.2	0	36722.3
A0A1S4B9H3	plant intracellular Ras-group-related LRR protein 5-like	LOC107805932	263670	52839.3	30776.7	30841.1	242534	0
A0A1S3ZQE4	suppressor of mec-8 and unc-52 protein homolog 1-like	LOC107789207	401980	265274	414702	313449	424298	193033
A0A1S3XNA5	elongation factor 1-gamma 2-like isoform X2	LOC107766924	3761200	3.33213e+06	4.18941e+06	3.54505e+06	3.69765e+06	3.73872e+06
A0A1S3XNA9	uncharacterized protein LOC107767031	LOC107767031	76244	63424.4	70781.5	0	0	74168.1
Q9XG70	Aquaglyceroporin (Tonoplast intrinsic protein (Tipa))	TIPa	638780	675710	600331	430695	0	621877
A0A1S3XUQ0	protein C2-DOMAIN ABA-RELATED 7-like	LOC107769012	198200	190368	223576	146852	139429	221350
A0A1S3XNF3	Ribonucloprotein	LOC107766976	581740	478037	370930	469198	0	177817
A0A1S3XNF5	mechanosensitive ion channel protein 1, mitochondrial-like	LOC107766854	0	221019	408008	0	193416	0
A0A1S3XNF9	calcium-dependent protein kinase SK5-like	LOC107766827	1424300	1.33255e+06	1.05129e+06	859812	1.78034e+06	854051
A0A1S3XNH9	probable aldo-keto reductase 2 isoform X1	LOC107767026	1598600	1.18011e+06	794490	1.15884e+06	1.63494e+06	1.26368e+06
A0A1S4DP61	uncharacterized protein LOC107831931	LOC107831931	111260	47545.6	27286.3	0	213618	37105.8
A0A1S4DAN7	uncharacterized protein LOC107827818 isoform X2	LOC107827818	34929	32192.8	40630.2	30378.1	0	34981.5
A0A1S3XNK7	aldo-keto reductase family 4 member C10-like isoform X1	LOC107767146	0	11797.8	0	21117.1	0	12891.9
A0A1S3XNM9	tubulin-folding cofactor B-like	LOC107767110	79733	73229.9	94274.2	0	62872.9	91789.2
A0A1S3XPN4	mannose-1-phosphate guanyltransferase alpha-like isoform X2	LOC107767406	132530	197258	138936	102462	152448	114061
A0A1S3XNP4	centromere/kinetochore protein zw10 homolog	LOC107767125	1520	0	25707.3	0	0	22963.4
A0A1S3XNQ1	NAP1-related protein 2-like	LOC107766902	0	99820.7	0	108894	0	0
A0A1S3XNR8	Mannose-1-phosphate guanylyltransferase	LOC107767148	189590	161390	157789	191415	24273.9	176239
A0A1S3XNS7	HECT-type E3 ubiquitin transferase	LOC107767217	1028100	554309	733032	413764	790497	860465
A0A1S3XNX7	protein GDAP2 homolog isoform X2	LOC107767161	94229	74486.3	81656.5	162251	77592.7	151616
A0A1S4CLY8	abscisic acid receptor PYL9-like	LOC107820377	6738.6	4122.2	18006.3	15277.6	13095.1	14708.2
A0A1S3XNW2	coiled-coil domain-containing protein 18-like isoform X2	LOC107767246	363390	410743	127863	667262	386566	204500
A0A1S3XP24	importin subunit beta-1-like	LOC107767272	335770	311354	336974	360679	344056	321338
A0A1S3XP40	RNA-binding protein 25-like isoform X3	LOC107767286	44261	0	0	34298.7	24246.2	1509.3
Q3Y6U9	Putative xylanase Xyn2		104380	116010	27495.8	190745	107616	154222
A0A1S3XPA9	golgin subfamily A member 3-like isoform X2	LOC107767282	171190	60610.8	124471	94098.3	168046	239069
A0A1S3XP56	Ferredoxin	LOC107767245	594710	626907	1319129	497386	1.00881e+06	549262
A0A1S3XPD7	vesicle-associated membrane protein 711-like isoform X2	LOC107767297	62851	55891.3	19556.5	54369.6	62340.7	56468.6
A0A1S4D6D1	Peroxidase	LOC107826490	0	6044.9	0	101803	0	56293.8
A0A1S4AE48	thylakoid membrane protein ssl2009-like	LOC107796677	534510	713906	70923.1	691184	859241	64465.9
A0A1S3ZA30	heterogeneous nuclear ribonucleoprotein 1-like	LOC107784632	76186	63319.5	84070.5	75359.6	70191.2	68800.3
A0A1S4DP52	protein GPR107-like	LOC107831929	0	182419	221710	201923	271778	216505
A0A1S3XPB7	uncharacterized protein LOC107767325	LOC107767325	129130	178406	120601	105327	247682	166577
A0A1S3XPC1	altered inheritance of mitochondria protein 32-like	LOC107767330	627810	570515	478942	550017	649219	389363
A0A1S3XPE4	serine/threonine-protein phosphatase 2A 65 kDa regulatory subunit A beta isoform-like	LOC107767339	4715400	3.70053e+06	5.17207e+06	4.10859e+06	3.64597e+06	4.21524e+06
A0A1S3XPF3	probable 26S proteasome non-ATPase regulatory subunit 3	LOC107767363	4802400	3.88512e+06	6103565	5.43015e+06	6.35234e+06	5920205
A0A1S3XPF8	Calcium-transporting ATPase	LOC107767367	158960	692681	170737	270430	390840	444164
A0A1S3XPG1	uncharacterized protein LOC107767135	LOC107767135	452760	392142	819548	149836	981838	291226
A0A1S3XPI1	ubiquitin-NEDD8-like protein RUB2	LOC107767149	540640	661626	399729	649492	857360	576814
A0A1S3XPI8	C-terminal binding protein AN-like	LOC107767382	165400	157618	144172	283048	444736	191031
A0A1S3XQA9	uncharacterized protein LOC107767383 isoform X2	LOC107767383	70384	311234	653061	57944.2	31385.6	24758.9
A0A1S4B2L1	Threonine synthase	LOC107803812	1931400	1.50423e+06	2.12822e+06	1.11796e+06	1.58254e+06	2.00825e+06
A0A1S3XPL9	Eukaryotic translation initiation factor 3 subunit E	LOC107767397	374600	262922	412746	271122	340788	342117
A0A1S3XPM5	kinesin KP1-like	LOC107767195	91662	107630	92953.5	36595.5	22944.3	266338
A0A1S3XPM7	protein transport protein SEC13 homolog B-like	LOC107767407	279280	228433	257132	148009	231570	269351
A0A1S3XPN7	subtilisin-like protease SBT1.9	LOC107767414	35117	54290.4	17124.5	46356.9	32898.2	73969.7
A0A1S3XPP7	actin-related protein 7-like	LOC107767424	141120	532537	92584.4	206280	391570	566367
A0A1S4AWS5	mRNA-decapping enzyme-like protein	LOC107802058	65101	68175.7	75050.9	0	0	67725.5
A0A1S3XPR2	Guanosine nucleotide diphosphate dissociation inhibitor	LOC107767440	326340	288270	184463	230644	197927	376366
X5CTX7	Shikimate kinase	SK	13561	11791.3	18510.1	17652.6	10404	18010.3
A0A1S3XPZ5	putative late blight resistance protein homolog R1A-3 isoform X2	LOC107767442	311370	299216	157509	342238	268705	189293
A0A1S3XPX1	isoflavone reductase-like protein	LOC107767471	1194.8	623408	162078	752121	224839	682024
A0A1S4B3D6	uncharacterized protein LOC107804126	LOC107804126	155710	463657	279666	484892	363107	370142
A0A1S4DKT5	mediator of RNA polymerase II transcription subunit 27-like	LOC107830769	41452	30745	30222.1	5954.9	38331.9	36165
Q9XF71	Chloride channel protein		554890	524894	845164	195409	801461	636659
A0A1S3XQ21	Superoxide dismutase	LOC107767528	34941	35787.2	57327.8	26132.9	0	56092.7
A0A1S4BUV2	putidaredoxin-like	LOC107812133	423090	0	403041	33651.9	16200.4	587184
A0A1S4ACV6	developmentally-regulated G-protein 3-like	LOC107796147	1003100	935833	1.292e+06	537931	982403	1508694
A0A1S3XQ27	uncharacterized protein LOC107767512	LOC107767512	27866	26653.1	17679.2	17410.9	20420.6	23580.1
A0A1S3XT84	dTMP kinase	LOC107768472	53435	0	44065.7	39180.6	0	0
A0A1S4AP04	rRNA methyltransferase 1, mitochondrial-like	LOC107799835	18464	0	23097.7	0	0	0
A0A1S4D8E0	inosine triphosphate pyrophosphatase-like	LOC107827163	43617	47143.2	49085.3	33916.3	50069.6	83825.9
A0A3G1CIK9	Phytochrome		268020	459983	255706	205713	327153	361074
A0A1S3XQ81	Trafficking protein particle complex subunit 2-like protein	LOC107767365	126490	108044	112810	99208.2	112229	121967
A0A1S3XQ99	CBS domain-containing protein CBSX3, mitochondrial-like	LOC107767529	3454400	2.3214e+06	3.74781e+06	2.84785e+06	3.06468e+06	2.78078e+06
A0A1S3XQA4	Coatomer subunit delta	LOC107767589	3081100	3.83974e+06	3.26959e+06	3.97468e+06	2.65767e+06	3.86378e+06
A0A1S3XQB7	Peroxidase	LOC107767390	556300	922164	329244	30324.7	567323	599520
A0A1S3XQB8	protein HASTY 1-like isoform X3	LOC107767613	118520	104692	85173.8	61267.9	66151.9	146506
A0A1S3YNS5	tropinone reductase homolog At5g06060-like	LOC107778082	187390	248270	184403	60099.1	47088.7	185458
A0A1S3XQE3	60S ribosomal protein L7-4-like	LOC107767555	263540	216777	405305	127822	249336	337791
A0A1S3XQF4	ATP synthase subunit d, mitochondrial	LOC107767566	218840	0	0	0	0	0
A0A1S3XQG2	60S acidic ribosomal protein P1-like	LOC107767644	92274	4.56681e+06	5.73189e+06	4.06853e+06	4.9971e+06	5.11651e+06
A0A1S3XQI4	60S ribosomal protein L3-2	LOC107767586	1007700	1.36754e+06	966623	1.23997e+06	977790	1.1596e+06
A0A1S4AG05	Prohibitin	LOC107797276	1363300	711730	989187	908324	1.22793e+06	1.24149e+06
A0A1S3XQI7	Aspartate--tRNA ligase	LOC107767661	4245700	5109406	5.45158e+06	4.87014e+06	3.7069e+06	6.24465e+06
A0A1S3XQK9	zinc finger CCCH domain-containing protein 14-like	LOC107767677	19982	21594.6	14754.4	8731.7	35369.4	43979.1
A0A1S3Z6V4	uncharacterized protein LOC107783477	LOC107783477	130110	197914	183984	187205	233450	143993
A0A1S3XQN2	GDSL esterase/lipase At5g03610-like	LOC107767692	50584	45044.8	34101.4	62962.2	52835.8	82245.7
A0A1S3XQR5	Fructose-bisphosphate aldolase	LOC107767727	2471400	2.29122e+06	253152	2.34196e+06	2.34755e+06	0
A0A1S3XQS5	nuclear pore complex protein NUP98A-like	LOC107767733	447500	739461	951510	693601	976762	955579
A0A1S4BDY7	COP9 signalosome complex subunit 2-like	LOC107807237	288830	164627	150776	252920	224469	105494
A0A1S3XQS7	Catalase	LOC107767654	12048000	9.68026e+06	1.12112e+07	5.00983e+06	1.1933e+07	7.76855e+06
A0A1S3XQV7	Thiamine phosphate synthase	LOC107767671	97370	6898.2	58837.1	387573	90823.4	65960.1
A0A1S3XQT4	protein RAE1-like	LOC107767524	39027	37169.4	56683.4	29646.1	63266.5	33489.2
A0A1S3XQU9	Pectin acetylesterase	LOC107767541	3926200	4.77086e+06	3.78402e+06	5.91164e+06	3.6175e+06	4699403
A0A1S3XQV5	putative late blight resistance protein homolog R1A-3	LOC107767752	237200	235399	229890	326045	202757	199900
A0A1S3XQV9	probable 2-oxoglutarate-dependent dioxygenase AOP1.2	LOC107767766	365120	453444	193420	22478.9	442711	285323
A0A1S4DCE8	protein ELC-like	LOC107828341	14282	56332	89730.5	53266.6	11933	2326.1
A0A1S3XQZ7	Asparagine--tRNA ligase	LOC107767713	0	0	0	0	95138.1	0
A0A1S3XR11	probable cadmium/zinc-transporting ATPase HMA1, chloroplastic	LOC107767810	0	0	50295.3	55060.7	46290.3	54800.6
A0A1S3XR14	Eukaryotic translation initiation factor 3 subunit K	LOC107767811	2003800	1.65797e+06	2.05919e+06	1.80532e+06	1.81106e+06	2.1591e+06
A0A1S3XR20	26S protease regulatory subunit S10B homolog B-like	LOC107767815	63692	53930.6	66900.1	0	66593.7	86547.1
A0A1S3XR52	ribosomal RNA small subunit methyltransferase NEP1-like	LOC107767617	0	17092.6	30422.6	17854.6	27476.8	0
A0A1S3XRE9	RNA polymerase II-associated protein 3 isoform X3	LOC107767865	35922	26228.8	82287	36840.7	87619.5	34976.8
A0A1S3XRA1	ADP-ribosylation factor-like protein 8B isoform X2	LOC107767879	137140	297641	179615	153298	232669	228566
A0A1S3XRA5	4-coumarate--CoA ligase	LOC107767884	231650	223403	97587	410098	246993	233667
A0A1S3Z3Y4	Translocation protein SEC62	LOC107782517	124520	387265	162816	0	143652	0
A0A1S3XRB8	signal peptide peptidase-like	LOC107767668	189910	0	0	184198	0	191172
A0A1S3XRC6	protein MRG1-like	LOC107767843	60611	30509.9	53479.4	56987.5	60477.7	55709.2
A0A1S3ZYV1	probable polyamine oxidase 5	LOC107791914	62682	84593.6	59231.1	85312.8	95782.4	99732.7
A0A1S3XRD2	AUGMIN subunit 7-like	LOC107767851	42614	0	47243.8	45507	46792.8	53524.5
A0A1S3XRL3	Sucrose-phosphatase	LOC107767908	14026	10846.5	12817.2	18618.3	13376.7	10171.6
A0A1S3XRE1	centromere-associated protein E-like	LOC107767690	37545	1.93113e+06	1.07074e+06	1.91789e+06	1.93005e+06	948778
A0A1S3XRE3	premnaspirodiene oxygenase-like	LOC107767919	63526	56616.3	86775.8	26578.8	44853.8	72923.2
A0A1S3XRF1	ubiquitin-conjugating enzyme E2 7-like	LOC107767930	508400	297652	484957	361042	138473	338821
A0A1S4A679	mitochondrial adenine nucleotide transporter ADNT1-like	LOC107794152	0	25425.1	63685.1	0	0	46312.1
A0A1S3XRF7	Succinate dehydrogenase assembly factor 4, mitochondrial	LOC107767940	44653	49972.1	54648.5	44838.6	38861.1	44448.5
A0A1S3XRI1	NADP-dependent D-sorbitol-6-phosphate dehydrogenase-like	LOC107767965	1681800	2.62988e+06	2.18169e+06	2.51717e+06	2.17975e+06	1.8015e+06
A0A1S3XRI3	protein transport protein SEC24-like	LOC107767726	168520	175508	212872	159425	143148	146100
A0A1S3XRI8	L-ascorbate oxidase homolog	LOC107767898	887970	426205	423041	809768	545498	520019
A0A1S3XRJ4	uncharacterized protein LOC107767732	LOC107767732	356490	202747	52432	303917	291979	441765
A0A1S3XRJ7	chaperonin CPN60-like 2, mitochondrial	LOC107767906	440270	710330	2.15366e+06	779867	957649	952556
A0A1S3XRJ9	Reticulon-like protein	LOC107767738	4157500	2.75257e+06	3.25932e+06	3874141	2.65962e+06	3.31661e+06
A0A1S3XRL8	uncharacterized protein LOC107767924	LOC107767924	30354	52411.7	38128.5	46468.1	0	34637.7
Q5EFR4	Chloroplast oxygen-evolving protein 16 kDa subunit	psbQ	0	286280	48555.6	0	0	0
A0A1S3XRP6	DNA-binding protein DDB_G0278111-like isoform X2	LOC107768029	219050	295137	287437	305392	292822	209345
A0A1S4D3E6	Nucleoside diphosphate kinase	LOC107825581	58984	67072.4	60220.7	67395.8	22735.7	38999.5
A0A1S3XRQ7	putative leucine-rich repeat-containing protein DDB_G0290503	LOC107767970	703790	771228	713590	658105	651418	475872
A0A1S3XRQ8	mitochondrial adenine nucleotide transporter ADNT1-like	LOC107767971	217780	173638	278021	217832	202654	460637
A0A1S4CYS9	Pre-mRNA-splicing factor SLU7	LOC107824087	47676	45075.4	19280.2	50845	64427.6	58068.6
A0A1S4B8C7	uncharacterized protein LOC107805499	LOC107805499	8463.6	6352.3	6489.6	5075.1	5395.9	7346.1
A1XEI4	CYP98A33v1		899130	793032	905315	840033	1.13051e+06	837796
A0A1S3XRS7	50S ribosomal protein L22, chloroplastic	LOC107767990	8007400	8.116e+06	9.13545e+06	6103304	7.36109e+06	6.53538e+06
A0A1S3XRT6	Peroxidase	LOC107767816	92848	28498.9	46045.8	149042	44052.3	109490
A0A1S3XRW5	O-fucosyltransferase family protein	LOC107768094	8424.9	33007.5	45782.5	49130.3	0	14853.6
A0A1S3ZF50	sugar transporter ERD6-like 7	LOC107785986	240610	5565.7	387260	36677.2	64357.8	244434
A0A1S3ZQZ0	WSC domain-containing protein ARB_07867-like	LOC107789393	58259	19355.1	56396.2	6473	41300.5	0
A0A1S3XS26	Lactoylglutathione lyase	LOC107767887	5329800	4.89322e+06	6.33549e+06	8.64192e+06	7.04892e+06	4.87537e+06
A0A1S3XSU7	uncharacterized membrane protein At1g16860-like isoform X2	LOC107768166	10880	27034.7	9491.2	22038.6	10612.6	18710.1
A0A1S4CM36	Small nuclear ribonucleoprotein Sm D1	LOC107820528	748040	808188	922642	948291	570786	851284
A0A1S3XS42	Pescadillo homolog	LOC107768178	565600	340802	780894	592015	607254	413382
A0A1S3Y2X6	protein TRI1-like	LOC107771590	83194	0	97432.4	75455	92192.1	89380.7
A0A1S3XS65	NADH:ubiquinone reductase (non-electrogenic)	LOC107767923	18056	28181.8	27380.1	24345.6	32255.9	36898.9
A0A1S3XS80	Acetyltransferase component of pyruvate dehydrogenase complex	LOC107768212	641150	709543	570276	589553	0	0
A0A1S3XS81	glutamate synthase [NADH], amyloplastic-like	LOC107767943	6366300	4.14089e+06	6.11314e+06	1.9188e+06	5.58136e+06	3.75894e+06
A0A1S3XS87	bifunctional dethiobiotin synthetase/7,8-diamino-pelargonic acid aminotransferase, mitochondrial-like isoform X2	LOC107768222	72753	67063.6	48605.5	73295.5	66139.5	55971.8
A0A1S3XS99	uncharacterized protein LOC107768163	LOC107768163	0	17217.2	22251.8	16713	13209.2	0
A0A1S3YPA0	epsin-like	LOC107778342	0	19869	2061.9	28038.2	9034.8	16729.5
A0A1S3XSB2	GDSL esterase/lipase At5g37690-like	LOC107768243	0	22329.4	11074.5	43813.9	11411	41631.9
A0A1S4AY65	Hydroxymethylbilane synthase	LOC107802603	428740	76228.3	91923.1	598370	86044.3	989960
A0A1S3XSD1	HMG1/2-like protein	LOC107767998	559790	765115	395569	140974	508547	1.00621e+06
A0A1S3XSE3	umecyanin-like	LOC107768270	217480	317652	98827.9	183290	278241	140026
A0A1S3XSF3	WD repeat-containing protein 3-like	LOC107768283	161720	32121.7	221790	200834	209621	169779
A0A1S3XSG2	Diamine oxidase [copper-containing] 1, peroxisomal	DAO1	1531400	1.89559e+06	3.2651e+06	1.00139e+06	1.75249e+06	1.74549e+06
A0A1S3XSI4	rRNA biogenesis protein RRP5	LOC107768241	545830	701943	1.04551e+06	812151	620571	822721
A0A1S4CDI2	uncharacterized protein LOC107817897	LOC107817897	0	0	2127.4	14847.5	0	1816.2
A0A1S3XSK7	Potassium transporter	LOC107768329	471460	380114	200104	419778	200548	262758
A0A1S3XSK8	oxysterol-binding protein-related protein 3A-like	LOC107768322	1866200	3.18473e+06	2.27895e+06	2.50344e+06	2.50477e+06	2.365e+06
A0A1S3XSL5	blue copper protein-like	LOC107768268	0	186333	114536	169582	171252	0
A0A1S3XSM1	uncharacterized protein LOC107768083	LOC107768083	1746200	1.43501e+06	1.48292e+06	1.6645e+06	1.89995e+06	2.04424e+06
A0A1S3ZBU8	erlin-2-B-like	LOC107785002	1329400	320168	561029	793461	419283	1.15506e+06
A0A1S3XSN1	Reticulon-like protein	LOC107768346	112760	68649.2	129748	65411	273257	0
A0A1S3XSP4	5-methyltetrahydropteroyltriglutamate--homocysteine S-methyltransferase	LOC107768359	126310	80610	101538	32500.1	114079	177448
A0A1S3XSQ1	60S ribosomal protein L23	LOC107768301	5733100	5.1234e+06	7.47766e+06	5.61353e+06	5.78503e+06	7.32415e+06
A0A1S3XSQ4	Succinate--CoA ligase [ADP-forming] subunit beta, mitochondrial	LOC107768302	5634500	8.8621e+06	8519175	7.31763e+06	7.9096e+06	9.05623e+06
A0A1S3XSR3	myb-like protein X	LOC107768377	17460	14836.7	20913.1	23677.2	16463.5	23243.9
A0A1S3XSR9	basic form of pathogenesis-related protein 1-like	LOC107768379	3266800	3.8183e+06	361873	604781	1.96992e+06	6.03402e+06
A0A1S3Z316	ultraviolet-B receptor UVR8-like	LOC107782456	313270	462848	941675	627193	467609	360857
A0A1S3XST3	uncharacterized protein LOC107768333	LOC107768333	48887	34674	37209.7	46487.4	37441	38161.8
A0A1S3XSV4	3-dehydroquinate synthase, chloroplastic-like	LOC107768348	474200	455489	512340	486288	474226	552142
A0A1S3XSW1	UDP-sulfoquinovose synthase, chloroplastic-like	LOC107768419	310070	476320	487471	245147	352544	304875
A0A1S3XSW3	shikimate O-hydroxycinnamoyltransferase-like	LOC107768362	1193000	1.30029e+06	1.0092e+06	1.32849e+06	821262	1.60428e+06
A0A1S3XSW4	ATP-dependent zinc metalloprotease FTSH 4, mitochondrial-like	LOC107768422	484160	421361	495970	334340	223709	863317
A0A1S3XSZ5	L-gulonolactone oxidase	LOC107768458	3591000	6.55174e+06	1.02037e+06	2.27614e+06	1.92543e+06	1.28909e+06
A0A1S4D6V2	protein PAF1 homolog	LOC107826626	103950	85016.8	29864.9	81924.4	96567.5	72244.1
O04859	Serine/threonine-protein phosphatase	npp4	85896	76514.8	228294	73784.6	247692	93217.3
A0A1S3Z6Y0	probable ribosome biogenesis protein RLP24	LOC107783657	59423	34982.3	99431.4	36855.4	39288.5	65329.2
A0A1S4DFX5	uncharacterized protein LOC107829188	LOC107829188	11445	4317.9	10407.2	0	8943.3	10519.2
A0A1S3XT58	uncharacterized PKHD-type hydroxylase At1g22950-like	LOC107768447	30488	68996.9	0	68773.4	26727.7	98627.6
A0A1S3XT63	AP complex subunit sigma	LOC107768459	161420	200943	29249.5	163159	332013	344847
A0A1S4CGN9	monodehydroascorbate reductase 4, peroxisomal-like	LOC107818762	45157	39142	35575.8	44581	39682.1	5844.4
A0A1S3XT86	NPL4-like protein 1	LOC107768545	861100	1.01015e+06	1.18217e+06	1.50688e+06	1.51657e+06	1.63649e+06
A0A1S3XTA6	signal recognition particle receptor subunit alpha-like	LOC107768572	225280	183151	332984	247598	324070	348682
A0A1S4C1G1	Proteasome subunit alpha type	LOC107814160	587550	996720	917844	972950	859097	840507
A0A1S3XTB4	protein SRC2-like	LOC107768315	170170	123162	102346	81615.7	268798	203791
A0A1S3XTC0	low-temperature-induced cysteine proteinase-like	LOC107768587	15357000	1.54523e+07	1.20162e+07	1.22227e+07	1.57894e+07	1.20238e+07
A0A1S3XU28	uncharacterized protein LOC107768592 isoform X2	LOC107768592	40642	86266.7	2264.3	39094.3	32088.5	0
A0A1S3XTD4	protein MODIFIER OF SNC1 11-like	LOC107768338	355290	381437	256255	796071	323916	89069.9
A0A1S3XTD5	K(+) efflux antiporter 2, chloroplastic-like	LOC107768522	1085800	876860	737342	705209	1.20994e+06	1.2566e+06
A0A1S3XTD8	serine/threonine-protein phosphatase 6 regulatory subunit 3-like isoform X3	LOC107768579	164840	157771	104142	183052	170101	92357.8
A0A1S3ZYY2	2-C-methyl-D-erythritol 4-phosphate cytidylyltransferase	LOC107791921	53645	59733.8	51426.5	61396.2	61647.1	56006.7
A0A1S3XTF3	40S ribosomal protein S7	LOC107768552	9526100	8.72486e+06	1.21958e+07	1.0338e+07	9.50847e+06	1.00035e+07
A0A1S3XTF7	40S ribosomal protein S8	LOC107768559	198020	460322	885345	224096	535941	679871
A0A1S3XTG3	uncharacterized mitochondrial protein AtMg00810-like	LOC107768628	7383300	4.69628e+06	6.36532e+06	4.95661e+06	6.45777e+06	6.02769e+06
U3PLK3	Leucine aminopeptidase	lap2	1156900	2.44606e+06	2.38878e+06	3.90716e+06	969836	2.53001e+06
A0A1S3XTH4	basic form of pathogenesis-related protein 1-like	LOC107768378	1460300	2.70916e+06	1.02805e+06	942288	1.6929e+06	2.53615e+06
A0A1S3XTH9	uncharacterized protein At3g49720-like	LOC107768381	1003800	649969	1.1282e+06	1.04472e+06	869660	927517
A0A1S3XTI7	polyadenylate-binding protein-interacting protein 11-like	LOC107768645	328340	0	201959	76274.3	61572.1	59419.3
A0A1S3XTJ7	uncharacterized protein LOC107768583	LOC107768583	23116	25393.4	24729.7	0	13219.5	25595.8
A0A1S4A1W3	DNA replication complex GINS protein PSF3-like	LOC107792848	21009	0	28336.7	23918.9	28244.4	0
Q56D10	Annexin	ann12	665590	1043970	229870	1.18721e+06	450017	594136
A0A1S3XTM5	Ribose-phosphate diphosphokinase	LOC107768671	67099	20303.1	62532.9	16228.5	81298	25708.2
A0A1S3XTM9	tankyrase-like	LOC107768617	25844	186596	2523.9	19328.7	25253.2	125707
A0A1S3XTN9	probable serine/threonine protein kinase IREH1	LOC107768627	61533	45814.6	33875	0	44186.9	0
A0A1S3XTS4	UDP-glycosyltransferase 91C1-like	LOC107768655	41674	32579.9	14447.2	32621.5	30847.2	0
A0A1S4BE72	Uroporphyrinogen decarboxylase	LOC107807289	301830	338123	452957	287315	290726	288600
A0A1S3XTT6	SART-1 family protein DOT2-like	LOC107768479	18485	17109	17835.8	16643.8	17476.6	21690.1
A0A1S4CZH2	Peroxidase	LOC107824314	132350	92102.7	129549	31728.5	158110	83170.4
A0A1S3XTU3	NKAP-like protein	LOC107768732	33415	34956.1	27025	39533.5	23931.7	12002.1
A0A1S3XTV1	phosphoethanolamine N-methyltransferase-like	LOC107768744	238570	198209	245042	149666	217667	203064
A0A1S3XU31	serine/threonine-protein kinase EDR1-like isoform X4	LOC107768748	48719	27313.6	32601.2	35991.8	57983.8	41531.8
A0A1S3XTZ2	tetratricopeptide repeat protein 7A-like	LOC107768550	7655.2	3096	86200.2	0	29813.4	8381
C3PTL6	Matrix metalloprotease 1	MMP1	79590	160188	20297.7	0	0	168872
A0A1S3XU05	uncharacterized protein LOC107768738 isoform X1	LOC107768738	32540	126398	39518	116065	97559.1	38737
A0A1S4BYM1	protein SLOW GREEN 1, chloroplastic-like	LOC107813268	331230	19828.5	688054	1.0658e+06	282300	486111
A0A1S3XU22	plastoglobulin-1, chloroplastic-like isoform X2	LOC107768802	27832	50152.6	29471.9	45487.7	33253.7	26290.9
A0A1S3XU32	BAG family molecular chaperone regulator 7-like	LOC107768598	682510	915855	1029946	1.06855e+06	1.08787e+06	965496
A0A1S3XU39	Secretory carrier-associated membrane protein	LOC107768768	1490000	1.63709e+06	1.21229e+06	637656	619296	706469
A0A1S4DDA2	60S ribosomal protein L13a-4-like	LOC107828558	556700	643561	440707	1.00157e+06	651860	815090
A0A1S3YC63	aminoacylase-1-like	LOC107774716	1511100	1.54392e+06	583234	1.61797e+06	1.45851e+06	1.60192e+06
A0A1S4CML1	21 kDa protein-like	LOC107820694	111510	61555.6	90762.9	38663.1	100535	105542
A0A1S3XU58	Cytochrome b-c1 complex subunit 6	LOC107768841	1053700	699330	840127	577149	721785	647757
A0A1S3XU62	Germin-like protein	LOC107768781	28788	27029.3	6183.2	21869.5	19617	18986.9
A0A1S3XU71	branched-chain-amino-acid aminotransferase-like protein 1	LOC107768791	1549000	1011132	1349753	1.25268e+06	959931	1.07402e+06
A0A1S3XU77	heat shock cognate protein 80-like	LOC107768797	86656000	7.06995e+07	1.01169e+08	8.7116e+07	6.15577e+07	9.05963e+07
A0A1S4DCB9	60S ribosomal protein L35a-3-like	LOC107828320	7402000	6.48449e+06	8.36645e+06	6.9907e+06	7167908	6.48588e+06
A0A1S3XUG9	RNA helicase	LOC107768863	43830	34965.9	40276.1	43825.2	40116.7	37469.4
A0A1S3XUA3	cytochrome b5-like	LOC107768820	154590	261884	412537	190586	221243	265497
A0A1S3XUA8	copper-transporting ATPase RAN1-like isoform X1	LOC107768661	267320	449332	307737	371879	246161	171923
A0A1S3ZVE8	cell division cycle protein 48 homolog	LOC107790858	29365	24397.2	40374.9	110247	116545	60019.1
A0A1S3Y076	Ribonuclease P	LOC107770656	20331	14203.5	24321.7	0	18259.6	24789.1
A0A1S3XUB8	3-oxoacyl-[acyl-carrier-protein] reductase FabG-like	LOC107768837	29665	13756.3	9416.8	0	26655.8	4965.1
A0A1S3XUC9	copper transport protein ATX1-like	LOC107768675	2476600	2.93934e+06	1.63734e+06	563180	2.4203e+06	2.42385e+06
A0A1S3XUD9	uncharacterized protein LOC107768686	LOC107768686	61184	71736.2	141399	63454.7	134949	55347.4
Q6TKR0	Ribosomal protein L3A	RPL3A	1422400	1.03746e+06	1.52392e+06	977795	1.35195e+06	839855
A0A1S3XUG1	probable 3-beta-hydroxysteroid-Delta(8),Delta(7)-isomerase	LOC107768926	622870	863148	981795	968683	623962	289271
A0A1S3XUI1	14-3-3 protein 9-like isoform X1	LOC107768942	191070	202638	1.20362e+06	1.4204e+06	1.10719e+06	1.13022e+06
A0A1S3XUI5	Glycosyltransferase	LOC107768887	56951	37225.1	0	0	0	140074
A0A1S3XUI8	Isocitrate dehydrogenase [NADP]	LOC107768947	30697000	24988795	3.266e+07	2.28216e+07	29799064	2.80232e+07
A0A1S3XUJ1	PLASMODESMATA CALLOSE-BINDING PROTEIN 3-like	LOC107768893	370040	397424	300804	288643	340953	354122
A0A1S4BA20	protein AE7-like 1	LOC107806155	15703	13012.7	20378.5	13603.7	16239.5	13473.7
A0A1S4BC15	mitochondrial import inner membrane translocase subunit TIM17-2-like	LOC107806706	0	146683	298240	246270	420177	320091
A0A1S3XUP8	ACT domain-containing protein DS12, chloroplastic-like	LOC107769014	158240	107493	27514.8	159198	73952	1.49368e+06
A0A1S3XUP9	uncharacterized protein LOC107768935	LOC107768935	970980	650144	1.00142e+06	538760	596238	809007
A0A1S3XUQ1	zinc finger CCCH domain-containing protein 17-like	LOC107768786	255000	285077	64229.7	39160.1	162836	185137
A0A1S4BNL3	Elongation factor G, mitochondrial	LOC107810234	2293200	821879	1.48173e+06	1.05339e+06	1.05283e+06	1.26142e+06
A0A1S3XUQ7	myosin-15-like	LOC107768946	75413	39013	0	0	108242	60105
A0A1S3XUQ9	uncharacterized protein LOC107768943	LOC107768943	708700	1.27382e+06	1.23185e+06	1.07785e+06	880460	1.24451e+06
A0A1S4DJH3	Ribosomal protein	LOC107830403	10776000	5.67442e+06	1.4121e+07	8.56237e+06	9.53714e+06	1.17348e+07
A0A1S3ZZ97	serine/threonine-protein kinase dst1-like	LOC107792014	0	10606.1	14862.1	20180.9	14353.9	21793.1
A0A1S3XUS2	folate synthesis bifunctional protein, mitochondrial-like	LOC107768956	293660	305088	177470	452675	381654	382779
A0A1S3XUS9	Dolichyl-diphosphooligosaccharide--protein glycosyltransferase subunit DAD1	LOC107768807	252410	328938	133140	144038	0	305715
A0A1S3XUT0	cytochrome b5-like	LOC107768957	391350	76792.5	392377	241697	294702	303505
A0A1S3XUT4	cullin-3A-like	LOC107768960	684840	563691	741202	829570	653422	602599
A0A1S3XUT7	ruBisCO large subunit-binding protein subunit alpha-like	LOC107769050	807460	1.14982e+06	1.18636e+06	877469	920020	1.0234e+06
A0A1S4A9D2	uncharacterized protein At2g27730, mitochondrial-like	LOC107795180	486160	875953	515472	755821	638912	672466
A0A1S3XUU6	Protein-synthesizing GTPase	LOC107768991	50190	39457	54742.3	50792.8	51939.8	45522.5
A0A1S3XUV2	intracellular ribonuclease LX-like isoform X2	LOC107769065	84971	116447	0	32131.3	24434.2	0
A0A1S3XUV5	endoplasmin homolog	LOC107769069	113750	544347	874771	596940	522090	849518
A0A1S3XUV8	GDSL esterase/lipase At1g28590-like	LOC107768840	704680	705716	199994	1.01524e+06	578061	972675
A0A1S3XUX1	uncharacterized protein LOC107769077	LOC107769077	106530	166486	0	133291	60809.6	0
A0A1S3XUX3	Signal peptidase complex subunit 2	LOC107768856	173070	75562.3	0	0	364422	240297
A0A1S4C9U5	DNA-directed RNA polymerase subunit	LOC107816681	0	39138.8	72107.2	63038.2	59712.2	42702.1
A0A1S3XV43	putative late blight resistance protein homolog R1B-23	LOC107768910	1018200	2.05317e+06	1.26975e+06	1236230	2.02541e+06	1.7214e+06
A0A1S3XVT1	pullulanase 1, chloroplastic-like isoform X2	LOC107769155	8573.9	10800.3	0	17087.5	10617.7	0
A0A1S3XV55	acid phosphatase 1-like	LOC107769165	1020600	1.33692e+06	860446	1.77457e+06	991209	1.41339e+06
A0A1S4DK23	Vacuolar protein sorting-associated protein 28 homolog	LOC107830635	89028	86767.5	203914	233175	245729	244415
A0A1S3XV77	nuclear pore complex protein NUP62-like	LOC107768938	232040	705639	245481	266673	635830	250734
A0A1S3XV78	60S ribosomal protein L9-1-like	LOC107769103	295290	146541	342800	170580	326711	282744
A0A1S3XV88	uncharacterized protein LOC107769117	LOC107769117	14181	24532.8	12339.4	67135.9	0	25551.4
A0A1S4AK78	protein-tyrosine-phosphatase IBR5-like	LOC107798553	15455	11111.1	12523.9	15706.5	11247.6	13586.1
A0A1S3XVA1	splicing factor 3B subunit 1-like	LOC107769132	1391500	1.43184e+06	1.73191e+06	1.93446e+06	1.44936e+06	1163847
A0A1S3XVA8	protein WVD2-like 3	LOC107768961	41333	0	112441	78387.2	120275	0
A0A1S3XVB0	3-ketoacyl-CoA thiolase 2, peroxisomal-like	LOC107769197	756540	930409	679525	546885	671856	468627
A0A1S3XVB3	uncharacterized protein LOC107769146	LOC107769146	274000	326040	240803	445742	0	163809
A0A1S3XVB5	5-epi-aristolochene synthase-like isoform X1	LOC107769201	71806	84149.6	53139.2	115430	86707.1	98344.2
A0A1S3XVD2	putative leucine-rich repeat receptor-like protein kinase At2g19210	LOC107769167	208980	187569	76736.7	28477.3	212385	83872.2
A0A1S3XVE8	anthranilate phosphoribosyltransferase-like	LOC107769231	644220	372208	602267	408305	622112	330632
A0A1S3XVG7	V-type proton ATPase subunit	LOC107769027	34702	28131.5	25573.6	22716	27226.1	16826.8
A0A1S3XVY6	glutamyl-tRNA(Gln) amidotransferase subunit A-like isoform X2	LOC107769186	63226	64285	38670.1	46161.7	67072.6	59767.8
A0A1S3XVH1	Ribonuclease	LOC107769187	1691000	953111	1.56951e+06	906054	946408	1.3179e+06
A0A1S4B3I0	probable amino-acid acetyltransferase NAGS1, chloroplastic isoform X2	LOC107804156	14997	10071.4	14773.4	10795.5	12930.7	11618.6
A0A1S3XVK6	Acyl carrier protein	LOC107769281	363090	283808	416946	166404	354825	376224
A0A1S3XVT5	glycine-rich RNA-binding protein RZ1C-like isoform X2	LOC107769283	56001	50073.8	75758.1	42563.4	64838.7	61323.5
A0A1S3XVL9	Short-chain dehydrogenase/reductase	LOC107769229	75011	62225.9	51593.1	41126.7	81941.3	62110.3
A0A1S3XVM3	20 kDa chaperonin, chloroplastic-like	LOC107769079	155310	158635	192552	167618	190046	173245
A0A1S3Z3I3	splicing regulatory glutamine/lysine-rich protein 1-like	LOC107782600	34234	27158.3	0	34262.4	32945.4	27284.6
A0A1S3XVN8	Glutathione transferase	LOC107769090	542130	613654	474124	674559	612884	438261
A0A1S3XVN9	mitochondrial amidoxime reducing component 2-like isoform X1	LOC107769249	589630	1.04866e+06	936887	458054	1.07575e+06	363813
A0A1S3Z3H3	protein SSUH2 homolog isoform X2	LOC107782364	653600	904548	499960	469084	776286	565423
A0A1S3YNX2	enoyl-[acyl-carrier-protein] reductase [NADH] 2, chloroplastic-like	LOC107777990	1121800	0	0	864782	842882	37646
A0A1S3XWE1	probable receptor-like protein kinase At5g15080 isoform X2	LOC107769330	137580	131418	125389	106476	129811	93540.4
Q5DJV4	Fas-associated factor-like protein (Fragment)		165120	204453	131264	15838.1	247928	146232
A0A1S3XVS8	Calreticulin	LOC107769282	42655	0	37014.2	0	37562.2	31309.2
A0A1S3XVS9	uncharacterized protein LOC107769288	LOC107769288	501580	768920	818012	384407	832442	830174
A0A1S3XVU5	serine/arginine repetitive matrix protein 2 isoform X2	LOC107769303	144670	320113	94657.3	368656	253467	220934
A0A1S4CBM9	Splicing factor subunit	LOC107817263	382430	388260	302201	348548	355657	316719
A0A1S4DHJ9	AP complex subunit sigma	LOC107829888	268420	243010	781193	265845	1.0044e+06	259915
A0A1S3XVW7	uncharacterized membrane protein At1g75140-like	LOC107769394	39801	38993.3	27495.8	60789.1	46140.3	52367.4
A0A1S4BYG2	interferon-related developmental regulator 1-like	LOC107813216	206830	223196	192872	273346	184528	138694
A0A1S3XW68	glutamate-rich WD repeat-containing protein 1-like isoform X2	LOC107769418	194230	204092	140990	219160	212930	192221
A0A1S3XW02	Alpha-galactosidase	LOC107769425	59558	80709.5	43712.6	107576	63210	92286
A0A1S3XW26	Short-chain dehydrogenase/reductase	LOC107769219	41438	71296.6	8126.5	74835.4	63688.8	11594.1
A0A1S3XW29	Procollagen-proline 4-dioxygenase	LOC107769382	23971	12129.2	21071.7	15203.8	13242.1	27141.9
A0A1S4D5G3	ribose-phosphate pyrophosphokinase 4-like	LOC107826214	435050	1147525	1.49838e+06	1.03301e+06	961287	746441
A0A1S3XW41	CCT-eta	LOC107769239	4986100	2.71758e+06	6539484	4.78548e+06	4.92281e+06	4.39914e+06
A0A1S3XW63	WD repeat-containing protein 26-like isoform X2	LOC107769474	60041	51106.1	58446.1	60528.1	57860.5	63017.9
A0A1S4ASJ5	enhanced ethylene response protein 5-like	LOC107800906	273550	257728	268454	186376	271768	325484
A0A1S3XW71	mucin-2-like	LOC107769481	378020	421098	341264	311077	413755	277937
A0A1S3XW99	Ubiquitinyl hydrolase 1	LOC107769508	700890	660970	681001	544649	546124	713251
A0A1S3XWA3	transcription factor bHLH66-like	LOC107769448	111800	197345	180034	133348	235793	164830
A0A1S3XWA6	Peptidyl-prolyl cis-trans isomerase	LOC107769297	307000	367013	408258	337677	399205	403304
A0A1S3XWB1	Tryptophan--tRNA ligase	LOC107769302	584370	674015	986224	816781	931570	970313
A0A1S3XWD3	Phosphoglycerate mutase (2,3-diphosphoglycerate-independent)	LOC107769473	12671000	12958044	1.60911e+07	1.52923e+07	1.64378e+07	1.29107e+07
A0A1S4BP25	CBS domain-containing protein CBSX3, mitochondrial-like	LOC107810337	47615	47676.9	25917.7	52344	46735.2	57501
A0A1S3XWD8	CO(2)-response secreted protease-like	LOC107769478	131910	170838	64580.9	190677	120779	60814.4
A0A1S4BQ96	OPA3-like protein	LOC107810743	10205	0	34538.4	5166.9	10953.7	15104.9
A0A1S3XWG0	HIPL1 protein-like	LOC107769565	18469	0	16530	13579.9	25059	13376.4
A0A1S3XWH2	SNARE-interacting protein KEULE-like	LOC107769485	954610	892027	912328	881100	924429	689486
A0A1S3XWH6	5-methylthioadenosine/S-adenosylhomocysteine nucleosidase	LOC107769361	1943300	1.96022e+06	1.34217e+06	1.37229e+06	875353	1.99154e+06
A0A1S4BBK2	Deoxyribodipyrimidine photo-lyase	LOC107806543	0	226673	0	39623.1	27801.5	0
A0A1S3XWJ3	Conserved oligomeric Golgi complex subunit 4	LOC107769525	31644	0	53511.3	59038.1	24289.3	42808.8
A0A1S3XX16	protein EMSY-LIKE 3-like isoform X2	LOC107769540	0	52715.7	0	0	42328	0
A0A1S3XWK1	Glutathione transferase	LOC107769388	42806	55212.2	27714.3	339175	81879.6	143587
A0A1S3XWN7	uncharacterized protein LOC107769629	LOC107769629	1561800	1.57191e+06	1.39624e+06	872317	1.00236e+06	1.56971e+06
A0A1S4D0P0	transmembrane protein 87A-like	LOC107824596	186830	5826.3	613150	103182	170379	216014
A0A1S3XWQ8	calcium-dependent protein kinase 11-like	LOC107769595	215340	176798	145360	186172	197496	42405.5
A0A1S3XWQ9	uncharacterized protein LOC107769653 isoform X2	LOC107769653	73019	70277.4	42857.7	61431.3	123625	70336.1
A0A1S3XWR1	Sucrose synthase	LOC107769655	2486900	3.26182e+06	2.7019e+06	4.54945e+06	2.76597e+06	1.64159e+06
A0A1S3XWU0	probable inactive beta-glucosidase 14 isoform X2	LOC107769686	130820	193900	0	192300	0	0
A0A1S3XWU1	Indole-3-glycerol-phosphate synthase	LOC107769685	18678	20252.8	19421.8	0	0	13190.3
A0A1S3XWU3	Nuclear pore complex protein	LOC107769618	535100	447222	571144	242968	467393	455140
A0A1S4A637	uncharacterized protein LOC107794167	LOC107794167	115770	246126	46140.6	179443	0	130496
A0A1S4D0E0	Exocyst subunit Exo70 family protein	LOC107824595	40938	35521.4	37267.6	30525.6	51067.4	42513.2
A0A1S3XWX6	eukaryotic translation initiation factor 3 subunit J-like isoform X2	LOC107769716	315010	121456	107304	75970.2	52728.9	58671.2
A0A1S3XWX8	Pectinesterase	LOC107769652	1026100	201949	547103	100165	792573	141604
A0A1S3XWY0	DEAD-box ATP-dependent RNA helicase 21	LOC107769656	199540	319315	272714	483757	328118	416234
A0A1S3XX03	31 kDa ribonucleoprotein, chloroplastic	LOC107769683	62738	306324	0	310646	220934	259868
A0A1S3XX29	protein GRIM REAPER-like	LOC107769707	0	11001.8	16056.2	0	29442.5	23842.7
A0A1S3XX32	uncharacterized protein LOC107769748 isoform X3	LOC107769748	0	0	0	16639.3	17257.8	11970.9
A0A1S3XX48	50S ribosomal protein L18-like	LOC107769777	13131	6241.9	23332.1	5849.8	0	15754.7
A0A1S3XX52	protein XAP5 CIRCADIAN TIMEKEEPER	LOC107769723	81296	81532.9	84586.3	91711.8	86957.8	112134
A0A1S3XX56	Translocon-associated protein subunit alpha	LOC107769724	84262	247778	77287.4	215654	221274	286164
A0A1S3XX58	Sulfotransferase	LOC107769725	179050	43948	233970	41184.6	93083	52831.2
A0A1S3XX64	Ethanolamine-phosphate cytidylyltransferase	LOC107769594	304030	104947	44276.2	177355	51434.2	49093.7
A0A1S3Z1X3	transmembrane protein 256-like	LOC107782096	37855	34530.7	30557.2	30051.3	33958.6	25269.9
A0A1S3XX96	probable glucan 1,3-alpha-glucosidase	LOC107769613	2599100	2.54995e+06	2.12254e+06	2.5233e+06	2.71942e+06	2.29955e+06
A0A1S4DBJ9	Elongator complex protein 5	LOC107827990	35720	24321.8	33610.7	25597.2	29193.8	29214.2
A0A1S3XXF1	probable glutamyl endopeptidase, chloroplastic isoform X2	LOC107769805	798410	452744	1.15065e+06	718191	1.12517e+06	931333
A0A1S3YDV1	Pre-mRNA-processing factor 19	LOC107775142	1290500	847456	912517	1.09287e+06	912488	1.02236e+06
A0A1S3XXH0	probable prolyl 4-hydroxylase 10	LOC107769895	92386	83340.5	142896	144128	71721.2	97352.5
A0A1S3ZTJ9	Chorismate synthase	LOC107790266	1979200	1.81413e+06	1.59644e+06	1.52095e+06	1.14696e+06	1.64763e+06
A0A1S4AUY8	7-dehydrocholesterol reductase-like	LOC107801501	199110	885226	486384	1.51856e+06	715188	908390
A0A1S3XXK8	ATP-dependent RNA helicase-like protein DB10 isoform X2	LOC107769931	125540	12948.2	170657	114295	199428	442492
A0A1S3XXL6	Histone H2A	LOC107769946	86657	94591.5	94787	60099.1	83238	112890
A0A1S3XXM0	vam6/Vps39-like protein	LOC107769880	655840	633326	503771	585558	679223	692858
A0A1S3XXN3	receptor-like protein 12 isoform X1	LOC107769731	891690	508108	516429	559311	1067834	989770
A0A1S3XXN4	Autophagy-related protein	LOC107769966	80383	40733.1	32506.4	0	60477.7	87813.7
A0A1S3XXN7	Glutamate-1-semialdehyde 2,1-aminomutase	LOC107769957	925790	951973	850880	674514	347056	152409
A0A1S3XY50	NAD(P)H dehydrogenase (quinone)	LOC107769898	1648200	1.44146e+06	960229	1010681	2.01041e+06	1.55488e+06
A0A1S3XXP2	Glycosyltransferase	LOC107769742	101380	123840	277711	348854	151924	159672
A0A1S3XXQ5	60S ribosomal protein L8-like	LOC107769978	1669100	1.48597e+06	1784475	1.94944e+06	1.72074e+06	1.5682e+06
A0A1S4AL46	Serine/threonine protein phosphatase 2A regulatory subunit	LOC107798666	79431	93233.4	88893.6	94990.2	68353.9	101433
A0A1S3XXR8	uncharacterized protein LOC107770005	LOC107770005	78745	59277.9	144242	95362.4	108438	114354
A0A1S3XXR9	Transmembrane 9 superfamily member	LOC107769928	78429	70141.8	81522.8	85930.1	66027.5	71788.8
A0A1S3XXU1	casein kinase II subunit alpha-like isoform X1	LOC107770013	312440	238395	217191	213600	293582	310211
A0A1S3XXV0	uncharacterized protein LOC107769785	LOC107769785	129170	192063	40340	164157	149560	114977
A0A1S3XXV4	leucine-rich repeat extensin-like protein 1 isoform X2	LOC107770037	207320	232720	121339	182461	518689	250933
A0A1S3XXV5	WPP domain-interacting protein 2-like	LOC107769791	0	0	7798.2	23657.9	18927.5	0
A0A1S3XXV7	WW domain-binding protein 2-like	LOC107769958	43812	104049	134108	0	39329.6	102491
A0A1S3XXV8	synaptotagmin-5-like	LOC107770041	66714	80058.8	49619	71669.3	75117.3	47280.2
A0A1S4B8Y3	Pyridoxal phosphate homeostasis protein	LOC107805770	1524.9	37768.6	36875.6	31852.2	79204.9	44866
A0A1S3XXX0	uncharacterized protein LOC107769803	LOC107769803	622760	394023	597269	831544	518339	915389
A0A1S3XXX3	Peptidyl-prolyl cis-trans isomerase	LOC107769985	170640	142823	160233	132463	139347	174171
A0A1S3XXX9	heat shock protein 90-6, mitochondrial-like	LOC107769814	423370	158755	580301	236590	395012	473992
A0A1S4CB43	ribosomal RNA processing protein 1 homolog	LOC107816947	0	0	0	0	16712.1	0
A0A1S3Y3W2	Mannose-1-phosphate guanylyltransferase	LOC107771893	582380	364837	390522	155124	138761	213057
A0A1S3XY03	Mechanosensitive ion channel protein	LOC107769999	0	0	61796.8	0	41798.8	64778.5
A0A1S3XY13	subtilisin-like protease SBT2.3	LOC107770087	21685	16473.7	16910.1	10352.5	18572	26829.3
A0A1S4B984	zinc finger CCCH domain-containing protein 25-like	LOC107805859	14931	13262	18158	12181.9	15230.4	12476.3
A0A1S3XY23	SART-1 family protein DOT2-like	LOC107770048	95446	83998.7	64657.7	65194.3	60422.2	55568.5
A0A1S3XY51	chaperonin CPN60-2, mitochondrial	LOC107770118	0	982099	1.23943e+06	540984	0	714308
Q402F3	Tobamovirus multiplication protein 3	TOM3	28054	79227.8	81219.6	29213.8	35771.2	21716.6
A0A1S3XY62	gamma-soluble NSF attachment protein-like	LOC107770086	720570	689805	582186	741783	664149	377188
A0A1S3XY66	monocopper oxidase-like protein SKS1	LOC107770130	1267000	1.09733e+06	957027	1.94808e+06	1.49427e+06	1732736
A0A1S3XY67	thioredoxin-like 3-2, chloroplastic	LOC107770047	245060	248882	161639	216505	218109	57624.7
A0A1S3XY79	Pectinesterase	LOC107770128	119720	191440	196902	56097.9	382754	142312
A0A1S3XY89	arginase 1, mitochondrial	LOC107770139	636820	662938	376397	343078	518031	432773
A0A1S3XY97	NADH dehydrogenase [ubiquinone] 1 alpha subcomplex subunit 13	LOC107770117	1060700	981815	279048	1.49768e+06	1.54873e+06	1.6738e+06
A0A1S3XYA3	High-affinity nitrate transporter	LOC107770078	777680	1.1835e+06	410622	2.30894e+06	345422	1013856
A0A1S3XYB6	26S protease regulatory subunit 6B homolog	LOC107770176	356550	305022	95565	84340.3	333349	123195
A0A1S3XYC6	Pectinesterase	LOC107770142	1747700	1.73616e+06	1.50237e+06	1.22239e+06	1458099	1.27067e+06
A0A1S4ATG1	uncharacterized protein LOC107801109 isoform X2	LOC107801109	54305	0	0	48002.4	0	267197
A0A1S3XYZ1	COP9 signalosome complex subunit 3-like isoform X2	LOC107770159	606160	609619	500230	476006	566367	267065
A0A1S3XYF7	ATP-dependent zinc metalloprotease FTSH 10, mitochondrial-like	LOC107770012	1979200	1.44736e+06	1.27843e+06	912137	967771	1398751
A0A1S3XYH7	cytochrome c1-2, heme protein, mitochondrial	LOC107770145	2006000	1.75234e+06	1.56073e+06	1.50563e+06	1.5366e+06	1.68362e+06
A0A1S3XYH8	60S ribosomal protein L30	LOC107770030	537300	427025	619614	370143	436197	431120
A0A1S4D5M4	probable polygalacturonase	LOC107826279	40624	232523	194797	282129	237180	236519
A0A1S3XYK9	basic blue protein-like	LOC107770257	36030	53582.9	53991.1	65161.4	58433.9	66539.1
A0A1S3XYN3	Peroxidase	LOC107770279	127210	696552	56170.7	895070	306293	511462
A0A1S4CKQ0	glycosyltransferase-like KOBITO 1	LOC107820074	12108	10325.1	10735.4	0	6475.2	15889.8
A0A1S3XYN8	Lipoxygenase	LOC107770253	1854800	2.01271e+06	832286	2404827	2.65849e+06	1.51002e+06
A0A1S3XYU6	serine/arginine-rich splicing factor RS31-like isoform X1	LOC107770246	502430	489584	610676	592060	691821	590283
A0A1S3XYP9	nascent polypeptide-associated complex subunit alpha-like protein 2	LOC107770281	1434700	670406	7.05431e+06	745993	1.52129e+06	1025946
A0A1S3XZE7	Coatomer subunit zeta	LOC107770297	22222	389365	307996	300978	111284	425444
A0A1S3XYQ4	60S ribosomal protein L13	LOC107770287	311290	120789	615614	306742	569573	615180
A0A1S3XYS0	NAP1-related protein 2-like	LOC107770224	1891900	2.14174e+06	2.29242e+06	1.33904e+06	1.8199e+06	1.38326e+06
A0A1S3XYS3	peroxisomal fatty acid beta-oxidation multifunctional protein AIM1-like	LOC107770112	381570	96756.7	299278	76057.5	373228	649977
A0A1S3XYS9	protein argonaute 4-like	LOC107770310	1195900	1.81697e+06	1330002	1.54001e+06	1.10318e+06	593437
A0A1S3XYU0	eukaryotic initiation factor 4A-3	LOC107770285	17368	8494	24481.3	11675.8	19871.9	22681.9
A0A1S3XYU5	PLASMODESMATA CALLOSE-BINDING PROTEIN 1-like isoform X2	LOC107770292	30001	0	18625.8	0	0	0
A0A1S3XYU8	cytochrome b5-like	LOC107770339	146350	196098	134546	176753	123481	217997
A0A1S3XYV0	uncharacterized protein LOC107770296	LOC107770296	683980	615305	896357	592253	682224	797994
A0A1S4CWB7	GTPase-activating protein gyp7-like isoform X2	LOC107823218	74429	0	72839.4	120616	128968	0
A0A1S3XYW5	Methionine aminopeptidase	LOC107770144	442920	386828	576800	502265	746128	464160
A0A1S3XYX0	tubulin-folding cofactor D-like	LOC107770150	324350	469344	324705	524348	532273	497823
A0A1S3XYY2	26S proteasome non-ATPase regulatory subunit 4 homolog	LOC107770355	683550	533150	902851	594897	774529	955106
A0A1S3XZ03	4-hydroxy-4-methyl-2-oxoglutarate aldolase	LOC107770371	218450	0	262828	9765.4	332044	270031
A0A1S3XZ08	putative quinone-oxidoreductase homolog, chloroplastic	LOC107770378	230190	447124	135723	462276	251905	329177
A0A1S3XZ14	probable serine/threonine-protein kinase DDB_G0291350	LOC107770357	59737	48537.4	61220.2	51196.8	53393.8	60367.6
A0A1S3XZ18	pentatricopeptide repeat-containing protein At2g37230-like	LOC107770362	328230	212818	276973	352190	244681	121495
A0A1S3Y0V4	ATP-dependent Clp protease proteolytic subunit	LOC107770894	265050	476703	298061	142960	281272	212132
Q9ZR57	Ribonucleoside-diphosphate reductase		442340	277094	869274	407307	278960	334164
A0A1S3XZ26	Protein DETOXIFICATION	LOC107770411	184900	35986.2	166427	212238	192183	222984
Q7G0Y7	Peroxin-5 (Fragment)	PEX5	92592	192862	61771.8	91518.9	105088	29034.8
A0A1S3XZ52	uncharacterized protein LOC107770417 isoform X4	LOC107770417	387100	322169	262928	252772	254741	387445
A0A1S3XZ38	clavaminate synthase-like protein At3g21360	LOC107770380	200480	250577	146168	305914	88293.6	271438
A0A1S3XZ48	uncharacterized protein LOC107770391	LOC107770391	1073000	1.00225e+06	1.06396e+06	1.10736e+06	1.08982e+06	1.02821e+06
A0A1S3XZ80	Acetohydroxy-acid synthase small subunit	LOC107770361	1207100	1305974	1104561	1.30023e+06	1.29122e+06	1568766
A0A1S4AZL0	Aquaporin TIP2-2s	LOC107802889	0	0	1.07254e+06	0	0	0
A0A1S4CHD3	uncharacterized protein LOC107819018 isoform X2	LOC107819018	110840	88320.3	117708	88591.2	98550.6	84867.7
Q14TE3	Serine C-palmitoyltransferase	NtLCB2	50761	126442	130846	82877.6	102214	172678
A0A1S3XZB0	Pyruvate dehydrogenase E1 component subunit alpha	LOC107770390	533620	0	0	52122.7	0	199985
A0A1S3XZC0	Carboxypeptidase	LOC107770482	374790	452832	388517	443438	398290	152891
A0A1S3XZC1	kanadaptin	LOC107770402	30778	37128.9	111813	37519.3	46276.9	43191.4
A0A1S3XZD2	G-box-binding factor 1-like isoform X2	LOC107770468	11455	13394.4	3751.1	5159.2	9830.1	8616.5
A0A1S3XZG8	26S protease regulatory subunit 6B homolog	LOC107770439	490280	565375	661081	459268	445588	449161
A0A1S3XZH8	uncharacterized protein LOC107770452	LOC107770452	318430	232939	197630	312984	361904	330434
A0A1S3XZH9	Germin-like protein	LOC107770542	105030	139181	82398.7	71847.5	105396	115346
A0A1S3XZJ1	ribose-phosphate pyrophosphokinase 4-like	LOC107770543	0	28193.9	58777.2	0	0	88076.3
A0A1S3XZK3	membrane steroid-binding protein 2-like	LOC107770471	899460	992455	490025	952853	752396	577702
A0A1S3YPW1	fasciclin-like arabinogalactan protein 12	LOC107778308	0	241195	0	398955	0	320214
A0A1S3XZL9	1-phosphatidylinositol-3-phosphate 5-kinase	LOC107770585	84446	22613.7	80700.9	86395.4	39461.2	43621.1
A0A1S3XZM2	two pore calcium channel protein 1A	LOC107770546	705710	905991	706079	1.09514e+06	983081	572629
A0A1S3XZM5	LOW QUALITY PROTEIN: actin cytoskeleton-regulatory complex protein pan1-like	LOC107770364	17420	16181.7	12572.8	0	0	12547.1
A0A1S3XZN4	GDSL esterase/lipase At1g29670-like	LOC107770589	24148	156514	0	121546	43646.4	0
A0A1S4BGB0	cullin-1-like isoform X3	LOC107807954	146940	112576	159904	217685	111901	247863
A0A1S3XZQ4	uncharacterized protein At4g06744-like	LOC107770612	37789	59286.6	44765	144923	205202	242026
Q6Q8A2	Phosphotransferase	Hxk4b	103060	162353	103783	134210	159887	198049
A0A1S3XZT7	Inositol-tetrakisphosphate 1-kinase	LOC107770443	441030	543188	1.06276e+06	315923	951638	655238
A0A1S3XZU6	uncharacterized protein LOC107770667	LOC107770667	20971	19771.7	0	23023.6	20580.9	26362.7
A0A1S3XZV4	RRP12-like protein	LOC107770462	66237	30726.4	95609.9	31163.3	60860	50613.5
A0A1S3XZX6	dnaJ protein P58IPK homolog	LOC107770481	522800	398725	1330401	701045	482426	1.4763e+06
A0A1S3XZY4	uncharacterized protein LOC107770564	LOC107770564	71106	66018.2	70770.5	66529.9	64399.9	71309
Q40521	Ras-related protein Rab11B	RAB11B	6911400	856554	6.80832e+06	1.05161e+06	816207	7.61034e+06
A0A1S4AJB0	AUGMIN subunit 1-like isoform X2	LOC107798242	10328	4437.1	12239.6	0	6957.9	17361.4
A0A1S3Y010	Peroxidase	LOC107770743	339070	355007	82951.3	142721	415625	314159
A0A1S3Y013	probable glucan endo-1,3-beta-glucosidase A6	LOC107770592	352480	474800	637270	450372	735944	778744
A0A1S3Y017	trafficking protein particle complex subunit 6B-like isoform X1	LOC107770517	96026	112412	75786.1	58070.1	77410.8	117820
A0A1S3Y018	HIPL1 protein-like	LOC107770599	150760	156568	189131	0	213289	135691
A0A1S3Y030	Histone deacetylase	LOC107770761	101380	64703.8	124032	133609	130787	144069
A0A1S3Y048	Peroxidase	LOC107770624	6411000	6.5653e+06	2923750	7.42759e+06	5.95745e+06	5.65035e+06
A0A1S3Y052	Glutamate--tRNA ligase	LOC107770544	5170900	3.34591e+06	3.47508e+06	3.3004e+06	3.43285e+06	4.15772e+06
A0A1S3Y064	ras-related protein RABF2a-like	LOC107770679	0	0	0	155794	0	153845
A0A1S4D2S7	cullin-4-like	LOC107825351	1813500	1.38985e+06	1.1279e+06	1.81213e+06	1.59312e+06	1.4558e+06
A0A1S3Y074	probable alpha,alpha-trehalose-phosphate synthase [UDP-forming] 9	LOC107770687	1027000	1.20143e+06	898023	735156	1282079	1.1493e+06
A0A1S3Y081	soluble starch synthase 3, chloroplastic/amyloplastic-like	LOC107770809	426050	339501	268604	351907	487739	394822
A0A1S3Y093	acyl-coenzyme A oxidase 4, peroxisomal-like	LOC107770800	54370	39902	44416.9	39524.4	0	31432
A0A1S3Y0A8	coiled-coil domain-containing protein 124-like	LOC107770818	0	95552.7	0	51205.8	0	55205.8
O04899	Caffeoyl-CoA O-methyltransferase 5	CCOAOMT5	34993	32579.9	220034	319134	28018.3	105230
A0A1S3Y0D2	Formin-like protein	LOC107770834	125980	126683	109249	123918	114798	67568.7
A0A1S4B103	auxilin-related protein 2-like	LOC107803294	38874	34122.8	39659.7	32151.7	0	34990
A0A1S3Y0E6	DEAD-box ATP-dependent RNA helicase 56-like	LOC107770853	7216600	5.74255e+06	7624294	4.04527e+06	6.08332e+06	6.29849e+06
A0A1S4BNG5	Germin-like protein	LOC107810153	156760	388894	53694.9	201980	195924	194356
A0A1S3Y0G0	early nodulin-like protein 1	LOC107770784	542710	452569	434363	551004	536250	529729
A0A1S3Y0G9	ureidoglycolate hydrolase-like	LOC107770650	546860	525408	548640	1.02531e+06	559349	654983
A0A1S3Y0H1	3-ketoacyl-CoA thiolase 2, peroxisomal-like	LOC107770901	109670	0	158986	108425	121426	136673
A0A1S3Y0H3	peptidyl-prolyl cis-trans isomerase CYP71-like	LOC107770880	790010	746799	561687	498146	519922	545134
A0A1S3Y0J3	protein NETWORKED 4A-like	LOC107770905	15295	22428.9	77121.8	51793.7	23990.3	65044.9
A0A1S3Y0J6	RNA-directed DNA polymerase homolog	LOC107770928	161230	152161	182298	0	161192	0
A0A1S3Y0J7	ABC transporter D family member 1-like	LOC107770907	369070	367965	204533	362324	259211	324313
A0A1S3Y0K7	probable rRNA-processing protein EBP2 homolog	LOC107770919	181920	147951	385245	119810	193735	386312
A0A1S4C4Q9	Glucose-6-phosphate 1-epimerase	LOC107815055	451630	627629	253452	535299	833942	779849
A0A1S4CQ23	T-complex protein 1 subunit gamma	LOC107821431	82390	56453.3	106865	48450.6	80664	103124
A0A1S3Y0M9	uncharacterized protein LOC107770717	LOC107770717	788090	827839	288764	854252	748450	762366
A0A1S4A1C1	suppressor of disruption of TFIIS-like	LOC107792716	25916	13824.1	429116	14811.2	87266	82697.2
A0A1S3Y0Q1	translation initiation factor eIF-2B subunit gamma isoform X2	LOC107770965	185510	130248	224982	10154	129277	71063.4
A0A1S3Y0R1	pentatricopeptide repeat-containing protein At1g26460, mitochondrial-like	LOC107770976	774700	337773	777502	845752	752478	554211
A0A1S3YGE0	histone chaperone ASF1B-like	LOC107775902	24922	37249.2	0	43331.6	56484.6	49869.2
A0A1S3Y0T4	elongation factor 2	LOC107770769	40440000	3.82541e+07	5.15043e+07	4.00884e+07	4.15985e+07	4.48433e+07
A0A1S3Y0U6	lysM domain-containing GPI-anchored protein 1-like	LOC107770883	240520	320375	200932	114102	260896	228226
A0A1S3Y0U8	importin-11-like	LOC107770782	142600	125349	447999	72800.7	125649	124583
A0A1S3Y0V1	S-adenosylmethionine synthase	LOC107770931	202940	149974	182727	241606	169218	244793
A0A1S3Y0V9	Phosphoinositide phospholipase C	LOC107770942	1915600	1.55267e+06	1.73091e+06	1.7159e+06	1.58243e+06	684206
A0A1S4ABX6	condensin complex subunit 3-like	LOC107795974	23780	17979.4	31778.2	30889.9	18870	29191.6
A0A1S4D0V6	casein kinase I-like	LOC107824782	68116	29556.4	75839.9	31411.9	19486.5	75751.1
A0A1S3Y0Y1	60S acidic ribosomal protein P2A-like	LOC107771057	3499700	1.39827e+06	406751	3.34068e+06	1290916	1.4933e+06
A0A1S4AD46	ER membrane protein complex subunit 6	LOC107796353	78976	68287.3	86809.7	50210.6	77669.7	93230.5
A0A1S3Y124	60S acidic ribosomal protein P2-1-like	LOC107770879	1921000	1.51429e+06	2.39985e+06	1.97055e+06	1.69392e+06	2.0739e+06
A0A1S4CZY5	cysteine-rich receptor-like protein kinase 2 isoform X2	LOC107823620	0	0	105389	136945	52236.7	187800
A0A1S3Y159	D-3-phosphoglycerate dehydrogenase	LOC107771022	1921700	2.45547e+06	2.22349e+06	3.74954e+06	1881554	3.0733e+06
A0A1S3Y170	uncharacterized protein LOC107771067	LOC107771067	65494	50694.9	4135.1	0	0	58828
A0A1S3Y172	nudix hydrolase 3-like isoform X1	LOC107770936	1802200	2440705	1765123	2.53839e+06	1.96694e+06	2.08259e+06
A0A1S3Y175	exportin-2-like	LOC107771071	2148700	2.58363e+06	2.73961e+06	2671614	2.03117e+06	2.88525e+06
A0A1S4CXP5	uncharacterized protein LOC107823721	LOC107823721	23689	27249.1	18211.8	15945.9	23219.6	25464.5
A0A1S3Y184	splicing factor 3B subunit 2-like	LOC107771044	0	69398.3	58995.7	78507.5	67638.7	33602.5
A0A1S4BKX8	Cellulose synthase	LOC107809423	377620	283601	457795	879500	200681	738403
A0A1S3YKA6	Peroxidase	LOC107777026	1001800	800534	1.00311e+06	588440	1.27838e+06	693330
A0A1S3Y189	uncharacterized protein YMR315W-like	LOC107771052	375620	347560	374232	392101	361052	445543
A0A1S4DM58	Eukaryotic translation initiation factor 3 subunit J	LOC107831054	944420	785345	1.73939e+06	1458647	976628	1.58794e+06
A0A1S3Y195	calmodulin-binding protein 60 B-like isoform X2	LOC107771176	101620	92512.8	229222	364741	97284.7	79009.7
A0A1S3Y196	molybdate transporter 2-like	LOC107771090	1061400	480301	827817	217969	1.50722e+06	470082
A0A1S3YCQ6	60S ribosomal protein L32-1-like	LOC107774850	23849	20974.5	44374	0	64018.7	187753
A0A1S3Y1D1	Acyl-coenzyme A oxidase	LOC107771125	2189800	2174655	1.67026e+06	2.31949e+06	2.18365e+06	1.30449e+06
A0A1S3Y1D2	subtilisin-like protease SBT1.7	LOC107770994	2405100	2.01927e+06	2.71966e+06	2.03704e+06	2.05953e+06	2.15758e+06
A0A1S4AJI4	ATP-dependent Clp protease ATP-binding subunit ClpA homolog CD4B, chloroplastic-like	LOC107798347	7455200	7.6213e+06	7.80834e+06	7.3982e+06	7.38606e+06	7.62177e+06
A0A1S4BGL7	Carboxypeptidase	LOC107808036	546410	410283	325982	776179	262632	529493
A0A1S3Y1F9	acyl-CoA-binding domain-containing protein 4 isoform X1	LOC107771151	599140	673392	598117	798556	573190	1.1681e+06
A0A1S3Y1G1	luminal-binding protein 5-like	LOC107771128	702030	903422	681440	1.09922e+06	1.42172e+06	864951
A0A1S3Y1H9	ER membrane protein complex subunit 3	LOC107771040	1261200	1.20165e+06	1.07214e+06	1.00279e+06	1.19566e+06	1.04531e+06
A0A1S3Y1I0	40S ribosomal protein S16-like	LOC107771141	22473	15982.7	32612.1	21495	26156.4	34825.7
A0A1S3Y1I5	protein BTR1-like	LOC107771149	1173900	161041	331089	532507	200404	230332
A0A1S3Y1J2	BAG family molecular chaperone regulator 8, chloroplastic-like	LOC107771266	40522	0	36829.7	114862	93971.9	31316.8
A0A1S4C4L3	DNA-directed RNA polymerases II and V subunit 8A-like	LOC107815072	92321	30708.9	262948	275434	283091	216845
A0A1S3Y1L0	pentatricopeptide repeat-containing protein At1g10270-like isoform X2	LOC107771189	176310	182244	240753	168140	150650	298650
A0A1S3Y1L6	cytochrome b561 and DOMON domain-containing protein At3g25290-like	LOC107771081	397680	291857	427111	367147	388857	428806
A0A1S3Y1M2	O-acyltransferase WSD1-like isoform X1	LOC107771086	214960	296778	7110.8	87278.2	0	94726.7
A0A1S3Y1M4	protein STRICTOSIDINE SYNTHASE-LIKE 6-like	LOC107771202	135360	183632	91073.2	62780.6	61356.3	135228
A0A1S3ZDB0	probable ADP-ribosylation factor GTPase-activating protein AGD8	LOC107785612	101780	206465	369813	300694	297086	388333
A0A1S3Y1N3	uncharacterized protein LOC107771098	LOC107771098	35104	36312	30401.6	33586.1	27252.8	27028.6
A0A1S3Y1N9	Vacuolar protein sorting-associated protein 35	LOC107771103	389120	335662	442553	308865	388097	380068
A0A1S3Y1P3	coiled-coil domain-containing protein SCD2-like	LOC107771219	128600	97089.1	123364	179057	195646	123743
A0A1S3Y266	nucleosome assembly protein 14-like isoform X2	LOC107771225	0	756608	238628	0	0	142709
A0A1S3Y1Q4	DEAD-box ATP-dependent RNA helicase 16-like isoform X1	LOC107771116	34062	65316.2	84949.4	92155.5	57498.8	169297
A0A1S4BII0	Ribosome production factor 2 homolog	LOC107808655	43765	39857.2	141479	30965.9	47948.7	42391.3
A0A1S4C1L7	ras-related protein RABA2a	LOC107814193	639350	915352	589009	576094	612268	2.09893e+06
A0A1S3Y1S2	ran-binding protein 1 homolog c-like	LOC107771336	493630	619023	738688	734600	531317	651025
A0A1S4CPY5	ras-related protein RABD1	LOC107821208	613160	612101	560789	132656	573375	608380
A0A1S3Y1V6	mitochondrial import receptor subunit TOM5 homolog	LOC107771285	327240	362541	312515	273550	336873	431848
A0A1S3YLM2	UDP-glucose 6-dehydrogenase	LOC107777397	2121000	1.877e+06	2.55826e+06	2.53919e+06	1.88597e+06	3.76885e+06
A0A1S3Y1W2	sugar transport protein 14-like	LOC107771372	0	61275.7	84291	30668.6	83068.5	61423.6
A0A1S3Y933	stem-specific protein TSJT1-like	LOC107773590	1196000	1.36644e+06	825274	215143	153609	129485
A0A1S3Y2D4	probable NOT transcription complex subunit VIP2 isoform X2	LOC107771307	172100	221238	178158	24667.9	13832.9	133613
A0A1S3Y1Y3	Sucrose synthase	LOC107771392	793690	940721	490364	1.01403e+06	716770	911110
A0A1S3Y1Y5	receptor-like protein kinase HERK 1	LOC107771309	166870	74012.8	0	0	0	112380
A0A1S3Y1Y6	UPF0261 protein y4oU-like isoform X1	LOC107771300	501680	229308	140272	398387	208830	666591
A0A1S3Y1Z7	Histone H2B	LOC107771320	32781000	3.13268e+07	2.91697e+07	3.33364e+07	3.16291e+07	2.60756e+07
A0A1S3Y201	Purple acid phosphatase	LOC107771325	0	66378	70057.3	102641	92599.1	141632
A0A1S3Y299	C2 domain-containing protein At1g53590-like isoform X2	LOC107771419	28568	492493	24986	34102.4	23157	0
A0A1S3Y235	bark storage protein A-like	LOC107771344	152180	624326	761412	581972	496596	554117
A0A1S3Y242	late blight resistance protein R1-A-like	LOC107771367	136350	231845	225650	0	0	15192.7
A0A1S3Y268	omega-amidase, chloroplastic-like	LOC107771474	181130	152118	179784	148304	185463	198851
A0A1S3Y274	protein SLOW GREEN 1, chloroplastic-like	LOC107771396	0	0	0	34525.7	0	17729.7
A0A1S3Y279	ALG-2 interacting protein X-like	LOC107771400	31768	105135	160991	99810.8	112743	151653
A0A1S4CQ69	glucuronoxylan 4-O-methyltransferase 1-like	LOC107821207	17103	20867.4	17671.2	155692	227634	14968.9
A0A1S3Y286	ATP-dependent Clp protease proteolytic subunit	LOC107771248	378950	980000	503502	528218	528245	420834
A0A1S3Y296	outer envelope pore protein 24B, chloroplastic-like	LOC107771415	142080	166803	134696	131793	155911	198304
A0A1S3Y2A4	B-box zinc finger protein 19-like isoform X2	LOC107771491	53345	28155.6	28505.3	39561.9	0	0
Q03685	Luminal-binding protein 5	BIP5	20638000	1.96306e+07	2.36553e+07	2.13883e+07	2.09148e+07	2.39419e+07
A0A1S3Y2B4	nuclear pore complex protein NUP50A-like	LOC107771430	226900	189144	399589	228238	346882	332530
A0A1S3Y2C8	3-hydroxyisobutyryl-CoA hydrolase-like protein 5	LOC107771448	1212400	1.05094e+06	1.33409e+06	2.35841e+06	893633	2.51386e+06
A0A1S3Y2C9	guanine nucleotide-binding protein-like NSN1	LOC107771438	29472	0	33324.4	0	25428.9	28265
Q9ZQT8	WREBP-2 protein	WREBP-2	21514	22886	0	19645.3	24899.7	0
A0A1S3Y2G0	WD repeat-containing protein VIP3-like	LOC107771470	98151	0	0	0	61877.2	0
A0A1S3Y2G1	myosin-17-like	LOC107771471	32184	32915.6	36971.3	35999.8	27303.1	24400
A0A1S4DPB8	persulfide dioxygenase ETHE1 homolog, mitochondrial-like	LOC107831711	198050	273191	56472	699456	424575	482427
A0A1S4CBE0	Non-specific serine/threonine protein kinase	LOC107817187	14128	0	16492.1	0	20284.9	0
A0A1S3Y2H9	Katanin p80 WD40 repeat-containing subunit B1 homolog	LOC107771488	2102400	1.88805e+06	2.14767e+06	2.18831e+06	1.95317e+06	1.81293e+06
F2VJ75	Fructose-bisphosphate aldolase	LOC107797422	0	211528	71104.7	147226	85082.5	188462
A0A1S3Y2J0	villin-4-like	LOC107771362	5532500	5.89629e+06	4.1536e+06	7.22163e+06	4.15892e+06	2832544
A0A1S3Y2K8	beta-ureidopropionase-like	LOC107771508	159500	237969	152652	165417	164398	205907
A0A1S3Y2L8	alpha-xylosidase 1-like	LOC107771561	1178800	3.90666e+06	1.28132e+06	1.76027e+06	1.75373e+06	2.09496e+06
A0A1S3Y2M1	mitochondrial import receptor subunit TOM40-1-like	LOC107771512	0	10703.7	0	2752.4	0	34517.8
A0A1S3Y2M3	protein argonaute 1-like	LOC107771391	496730	560772	691236	887137	813186	1.00082e+06
A0A1S3ZH39	probable histone-arginine methyltransferase 1.3 isoform X2	LOC107786682	22305	17867.9	21418.9	18405	21349.5	26560.1
A0A1S4CRZ6	60S ribosomal protein L23a-like isoform X2	LOC107821921	2264100	1.93102e+06	820695	1.758e+06	1.91135e+06	659668
A0A1S3Y2P0	transportin-1-like	LOC107771529	466320	385920	528230	505704	343861	477393
A0A1S3Y2R6	Protein disulfide-isomerase	LOC107771549	10493000	8.23005e+06	1.38227e+07	1.17756e+07	1.0777e+07	1.21674e+07
A0A1S3Y2V1	Cytochrome b561 and DOMON domain-containing protein	LOC107771464	31936	89113.1	20451.3	10808.2	0	119861
A0A1S3Y2V7	UBP1-associated proteins 1C-like	LOC107771467	80399	24926.5	86457.6	34146.7	6365.6	25679.8
A0A1S3Y2X0	Serine hydroxymethyltransferase	LOC107771579	402040	1.00242e+06	0	1.13637e+06	1.1786e+06	0
A0A1S3Y2Y7	cystathionine gamma-synthase 1, chloroplastic-like	LOC107771605	565780	1.89515e+06	1.24631e+06	971259	828661	1338868
A0A1S4BPG5	FAD-dependent urate hydroxylase-like	LOC107810458	55401	62216.1	35413.2	70553.8	51957.2	66671.4
A0A1S3Y307	Glutathione transferase	LOC107771506	218460	153845	118626	125393	118467	118415
V9TKE9	L-ascorbate oxidase	AO	344610	257040	195854	344656	423434	323916
A0A1S3Y318	la-related protein 1-like	LOC107771687	125990	51311.7	80603.1	69107	67296.6	100668
A0A1S4CT38	mediator of RNA polymerase II transcription subunit 22a-like	LOC107822383	39015	10393.4	40619.3	43669.8	32044.3	33009.4
A0A6G6ADU9	Carbonic anhydrase		111180	41489.8	0	0	121601	103615
A0A1S4ARL1	protein IQ-DOMAIN 14-like	LOC107800543	57431	54504.7	57668	65247.6	63618.9	35917.6
A0A1S3Y346	T-complex protein 1 subunit alpha	LOC107771644	3233400	2.76887e+06	4.78493e+06	3.57626e+06	4.93586e+06	3.90808e+06
A0A1S3Y350	40S ribosomal protein S8	LOC107771534	1549900	1.40494e+06	1.34147e+06	1.35924e+06	1.65991e+06	205756
A0A1S3Y351	RNA-binding protein 2-like	LOC107771652	160680	174141	134935	94874.5	153753	124961
A0A1S3Y354	uncharacterized protein LOC107771709	LOC107771709	0	96850.7	20324.6	0	145111	28023.2
A0A1S3Y367	Phosphoribosylformylglycinamidine synthase	LOC107771670	4731800	4.37665e+06	5.82855e+06	4.32034e+06	4.77782e+06	5.73593e+06
A0A1S3Y381	stress protein DDR48-like	LOC107771681	1696000	2.90216e+06	998524	5.2588e+06	1.00742e+06	3.0887e+06
A0A1S3Y3A2	eukaryotic translation initiation factor-like	LOC107771688	854520	965391	1.07005e+06	1.08539e+06	1.50783e+06	860918
A0A1S3Y3C4	5-methylthioadenosine/S-adenosylhomocysteine nucleosidase 2-like	LOC107771706	1579200	1.7752e+06	1.17608e+06	1.67743e+06	1.49355e+06	1.7214e+06
A0A1S3YV85	CBL-interacting serine/threonine-protein kinase 8-like isoform X3	LOC107780181	42192	16663.9	16779.4	18840.8	19588.3	21155.5
A0A1S3Y3D4	ER lumen protein-retaining receptor-like	LOC107771715	0	0	101199	131680	0	0
A0A1S4ADS6	54S ribosomal protein L24, mitochondrial-like	LOC107796513	216790	121434	212134	158222	165303	38085.2
A0A1S3Y3F9	pumilio homolog 2-like isoform X2	LOC107771741	137220	219062	382152	91953.5	410415	258697
A0A1S4CFN5	DNA-directed RNA polymerase subunit beta	LOC107818481	702400	429606	748264	1.09125e+06	521350	573687
A0A1S3Y3R2	uncharacterized protein LOC107771845 isoform X4	LOC107771845	0	13870	18680.7	16928.7	20440.1	18535.4
A0A1S3Y3J6	binding partner of ACD11 1-like	LOC107771769	1380300	1.11888e+06	483691	1.75221e+06	1.24694e+06	1.31705e+06
A0A1S3Y3L0	GDSL esterase/lipase 5-like isoform X1	LOC107771790	319670	395116	109618	276750	404610	251717
A0A1S4A7C4	ras-related protein RABB1b-like	LOC107794510	281300	321053	251466	255394	270010	381542
A0A1S4CKI1	protein ABHD17C-like	LOC107820050	42156	78634	0	68326.3	54496.3	50085.5
A0A1S3Y3N2	Histone acetyltransferase	LOC107771873	540770	673425	463770	711349	722884	824733
A0A1S3Y3R1	thaumatin-like protein isoform X2	LOC107771842	30389	25800.2	51214	42890.2	25837.8	57335.7
A0A1S4A9V4	Beta-galactosidase	LOC107795322	0	0	0	0	512318	0
[truncated: 6,371 more rows]
